# Supplementary material
Source: PubMed Central journal article supplement (PMC4744563)
Supplement: NIHMS743706-supplement-1.pdf [file NIHMS743706-supplement-1.pdf]

Supplementary Table S1. Prioritization of candidate FPC susceptibility genes by private heterozygous PTVs

| Gene        | Number of private heterozygous PTVs in FPC kindred | Number of private heterozygous PTVs in BCCS samples | Number FPC patient tumors with somatic mutation | DNA repair gene | Cancer driver gene | FPC susceptibility gene | Hereditary cancer gene | Hereditary pancreatitis gene |
|-------------|----------------------------------------------------|-----------------------------------------------------|-------------------------------------------------|-----------------|--------------------|-------------------------|------------------------|------------------------------|
| ATM         | 19                                                 | 1                                                   | -                                               | Yes             | Yes                | Yes                     | Yes                    | -                            |
| SSPO        | 12                                                 | 8                                                   | 1                                               | -               | -                  | -                       | -                      | -                            |
| DNAH14      | 10                                                 | 3                                                   | -                                               | -               | -                  | -                       | -                      | -                            |
| CD36        | 9                                                  | 3                                                   | -                                               | -               | -                  | -                       | -                      | -                            |
| TET2        | 9                                                  | 1                                                   | -                                               | -               | Yes                | -                       | -                      | -                            |
| MUC16       | 8                                                  | 14                                                  | -                                               | -               | -                  | -                       | -                      | -                            |
| DNHD1       | 7                                                  | 4                                                   | 1                                               | -               | -                  | -                       | -                      | -                            |
| DNMT3A      | 7                                                  | 1                                                   | -                                               | -               | Yes                | -                       | -                      | -                            |
| PKHD1L1     | 7                                                  | 9                                                   | -                                               | -               | -                  | -                       | -                      | -                            |
| DNAH3       | 6                                                  | 5                                                   | -                                               | -               | -                  | -                       | -                      | -                            |
| MYH7B       | 6                                                  | 1                                                   | -                                               | -               | -                  | -                       | -                      | -                            |
| PKD1L2      | 6                                                  | 6                                                   | -                                               | -               | -                  | -                       | -                      | -                            |
| POLN        | 6                                                  | 2                                                   | -                                               | Yes             | -                  | -                       | -                      | -                            |
| POLQ        | 6                                                  | 7                                                   | -                                               | Yes             | -                  | -                       | -                      | -                            |
| RP1L1       | 6                                                  | 6                                                   | -                                               | -               | -                  | -                       | -                      | -                            |
| TTN         | 6                                                  | 5                                                   | 4                                               | -               | -                  | -                       | -                      | -                            |
| WDR87       | 6                                                  | 7                                                   | -                                               | -               | -                  | -                       | -                      | -                            |
| ABCA13      | 5                                                  | 3                                                   | 1                                               | -               | -                  | -                       | -                      | -                            |
| ASXL1       | 5                                                  | 1                                                   | -                                               | -               | Yes                | -                       | -                      | -                            |
| BBS10       | 5                                                  | 0                                                   | -                                               | -               | -                  | -                       | -                      | -                            |
| BRC A2      | 5                                                  | 6                                                   | 1                                               | Yes             | Yes                | Yes                     | Yes                    | -                            |
| CENP1       | 5                                                  | 1                                                   | -                                               | -               | -                  | -                       | -                      | -                            |
| CEP290      | 5                                                  | 5                                                   | -                                               | -               | -                  | -                       | -                      | -                            |
| CYP3A5      | 5                                                  | 2                                                   | -                                               | -               | -                  | -                       | -                      | -                            |
| DNAH12      | 5                                                  | 6                                                   | -                                               | -               | -                  | -                       | -                      | -                            |
| DNAH6       | 5                                                  | 1                                                   | 1                                               | -               | -                  | -                       | -                      | -                            |
| EPPK1       | 5                                                  | 4                                                   | -                                               | -               | -                  | -                       | -                      | -                            |
| ESYT3       | 5                                                  | 1                                                   | -                                               | -               | -                  | -                       | -                      | -                            |
| FRAS1       | 5                                                  | 4                                                   | -                                               | -               | -                  | -                       | -                      | -                            |
| HGC6.3      | 5                                                  | 0                                                   | -                                               | -               | -                  | -                       | -                      | -                            |
| IGFN1       | 5                                                  | 5                                                   | -                                               | -               | -                  | -                       | -                      | -                            |
| KCP         | 5                                                  | 4                                                   | -                                               | -               | -                  | -                       | -                      | -                            |
| LRRC43      | 5                                                  | 0                                                   | -                                               | -               | -                  | -                       | -                      | -                            |
| MCTP2       | 5                                                  | 1                                                   | -                                               | -               | -                  | -                       | -                      | -                            |
| MPO         | 5                                                  | 1                                                   | -                                               | -               | -                  | -                       | -                      | -                            |
| MUC4        | 5                                                  | 5                                                   | -                                               | -               | -                  | -                       | -                      | -                            |
| OBSCN       | 5                                                  | 8                                                   | 2                                               | -               | -                  | -                       | -                      | -                            |
| PALB2       | 5                                                  | 0                                                   | -                                               | Yes             | -                  | Yes                     | Yes                    | -                            |
| SLCO1B3     | 5                                                  | 2                                                   | -                                               | -               | -                  | -                       | -                      | -                            |
| SYT15       | 5                                                  | 3                                                   | -                                               | -               | -                  | -                       | -                      | -                            |
| XIRP2       | 5                                                  | 3                                                   | 1                                               | -               | -                  | -                       | -                      | -                            |
| ZNF266      | 5                                                  | 2                                                   | -                                               | -               | -                  | -                       | -                      | -                            |
| ZNF530      | 5                                                  | 1                                                   | -                                               | -               | -                  | -                       | -                      | -                            |
| ACACB       | 4                                                  | 1                                                   | 1                                               | -               | -                  | -                       | -                      | -                            |
| ALS2CL      | 4                                                  | 2                                                   | -                                               | -               | -                  | -                       | -                      | -                            |
| AMER3       | 4                                                  | 0                                                   | 2                                               | -               | -                  | -                       | -                      | -                            |
| ANKRD35     | 4                                                  | 4                                                   | -                                               | -               | -                  | -                       | -                      | -                            |
| ATP10B      | 4                                                  | 1                                                   | -                                               | -               | -                  | -                       | -                      | -                            |
| ATP8B3      | 4                                                  | 6                                                   | -                                               | -               | -                  | -                       | -                      | -                            |
| C10orf95    | 4                                                  | 0                                                   | -                                               | -               | -                  | -                       | -                      | -                            |
| C2orf88     | 4                                                  | 0                                                   | -                                               | -               | -                  | -                       | -                      | -                            |
| C5orf42     | 4                                                  | 2                                                   | -                                               | -               | -                  | -                       | -                      | -                            |
| CACNA2D4    | 4                                                  | 2                                                   | -                                               | -               | -                  | -                       | -                      | -                            |
| CAPN14      | 4                                                  | 0                                                   | -                                               | -               | -                  | -                       | -                      | -                            |
| CCDC141     | 4                                                  | 1                                                   | -                                               | -               | -                  | -                       | -                      | -                            |
| CCDC142     | 4                                                  | 0                                                   | -                                               | -               | -                  | -                       | -                      | -                            |
| CCDC173     | 4                                                  | 3                                                   | -                                               | -               | -                  | -                       | -                      | -                            |
| CCDC180     | 4                                                  | 4                                                   | -                                               | -               | -                  | -                       | -                      | -                            |
| CDH26       | 4                                                  | 1                                                   | -                                               | -               | -                  | -                       | -                      | -                            |
| CDKN2A      | 4                                                  | 0                                                   | 5                                               | Yes             | Yes                | Yes                     | Yes                    | -                            |
| CEP89       | 4                                                  | 2                                                   | -                                               | -               | -                  | -                       | -                      | -                            |
| CFTR        | 4                                                  | 5                                                   | -                                               | -               | -                  | -                       | -                      | -                            |
| CLTCL1      | 4                                                  | 1                                                   | -                                               | -               | -                  | -                       | -                      | -                            |
| COL6A5      | 4                                                  | 3                                                   | -                                               | -               | -                  | -                       | -                      | -                            |
| CROT        | 4                                                  | 2                                                   | -                                               | -               | -                  | -                       | -                      | -                            |
| DHX58       | 4                                                  | 3                                                   | -                                               | -               | -                  | -                       | -                      | -                            |
| DNAH10      | 4                                                  | 4                                                   | 1                                               | -               | -                  | -                       | -                      | -                            |
| DNAH8       | 4                                                  | 5                                                   | -                                               | -               | -                  | -                       | -                      | -                            |
| DNAH9       | 4                                                  | 2                                                   | 1                                               | -               | -                  | -                       | -                      | -                            |
| DOK7        | 4                                                  | 0                                                   | -                                               | -               | -                  | -                       | -                      | -                            |
| EFCAB13     | 4                                                  | 0                                                   | 1                                               | -               | -                  | -                       | -                      | -                            |
| FAM151A     | 4                                                  | 3                                                   | -                                               | -               | -                  | -                       | -                      | -                            |
| FAM186A     | 4                                                  | 3                                                   | -                                               | -               | -                  | -                       | -                      | -                            |
| FANCG       | 4                                                  | 1                                                   | -                                               | Yes             | -                  | -                       | Yes                    | -                            |
| FETUB       | 4                                                  | 0                                                   | -                                               | -               | -                  | -                       | -                      | -                            |
| FPGT-TNNI3K | 4                                                  | 1                                                   | -                                               | -               | -                  | -                       | -                      | -                            |
| GPR155      | 4                                                  | 0                                                   | -                                               | -               | -                  | -                       | -                      | -                            |
| HARS2       | 4                                                  | 0                                                   | -                                               | -               | -                  | -                       | -                      | -                            |
| IQGAP2      | 4                                                  | 2                                                   | -                                               | -               | -                  | -                       | -                      | -                            |
| KIF6        | 4                                                  | 1                                                   | -                                               | -               | -                  | -                       | -                      | -                            |
| LOC440335   | 4                                                  | 0                                                   | -                                               | -               | -                  | -                       | -                      | -                            |
| MYH1        | 4                                                  | 2                                                   | -                                               | -               | -                  | -                       | -                      | -                            |
| MYO7B       | 4                                                  | 2                                                   | 3                                               | -               | -                  | -                       | -                      | -                            |
| MYOF        | 4                                                  | 2                                                   | -                                               | -               | -                  | -                       | -                      | -                            |
| MYO2        | 4                                                  | 3                                                   | -                                               | -               | -                  | -                       | -                      | -                            |
| NLRX1       | 4                                                  | 0                                                   | -                                               | -               | -                  | -                       | -                      | -                            |
| PCDHAC1     | 4                                                  | 2                                                   | -                                               | -               | -                  | -                       | -                      | -                            |
| PKDREJ      | 4                                                  | 3                                                   | -                                               | -               | -                  | -                       | -                      | -                            |
| PTPN22      | 4                                                  | 0                                                   | -                                               | -               | -                  | -                       | -                      | -                            |
| RANBP17     | 4                                                  | 3                                                   | -                                               | -               | -                  | -                       | -                      | -                            |
| RYR1        | 4                                                  | 5                                                   | 4                                               | -               | -                  | -                       | -                      | -                            |
| SLC4A11     | 4                                                  | 1                                                   | -                                               | -               | -                  | -                       | -                      | -                            |
| SPAG4       | 4                                                  | 0                                                   | -                                               | -               | -                  | -                       | -                      | -                            |
| SPATA31E1   | 4                                                  | 4                                                   | -                                               | -               | -                  | -                       | -                      | -                            |
| SPG7        | 4                                                  | 1                                                   | -                                               | -               | -                  | -                       | -                      | -                            |
| SPINK5      | 4                                                  | 0                                                   | -                                               | -               | -                  | -                       | -                      | -                            |
| TEX15       | 4                                                  | 7                                                   | -                                               | -               | -                  | -                       | -                      | -                            |
| TRIM47      | 4                                                  | 1                                                   | -                                               | -               | -                  | -                       | -                      | -                            |
| TLL6        | 4                                                  | 2                                                   | -                                               | -               | -                  | -                       | -                      | -                            |
| USH2A       | 4                                                  | 6                                                   | 1                                               | -               | -                  | -                       | -                      | -                            |
| USP45       | 4                                                  | 5                                                   | -                                               | -               | -                  | -                       | -                      | -                            |

|            |   |   |   |     |   |   |   |     |   |
|------------|---|---|---|-----|---|---|---|-----|---|
| ZBBX       | 4 | 1 | 1 | -   | - | - | - | -   | - |
| ZDBF2      | 4 | 1 | - | -   | - | - | - | -   | - |
| ZFR2       | 4 | 1 | - | -   | - | - | - | -   | - |
| ZNF142     | 4 | 0 | - | -   | - | - | - | -   | - |
| AARS2      | 3 | 1 | - | -   | - | - | - | -   | - |
| ABCA10     | 3 | 2 | 1 | -   | - | - | - | -   | - |
| ABCA12     | 3 | 0 | - | -   | - | - | - | -   | - |
| ABCA4      | 3 | 0 | - | -   | - | - | - | -   | - |
| ABCA7      | 3 | 4 | - | -   | - | - | - | -   | - |
| ABCB5      | 3 | 3 | - | -   | - | - | - | -   | - |
| ABCC11     | 3 | 0 | 1 | -   | - | - | - | -   | - |
| ABCC2      | 3 | 1 | - | -   | - | - | - | -   | - |
| ACBD4      | 3 | 2 | - | -   | - | - | - | -   | - |
| ADAM2      | 3 | 0 | - | -   | - | - | - | -   | - |
| ADAMTSL4   | 3 | 1 | - | -   | - | - | - | -   | - |
| ADCY10     | 3 | 3 | - | -   | - | - | - | -   | - |
| ALS2CR11   | 3 | 1 | - | -   | - | - | - | -   | - |
| ANKMY1     | 3 | 2 | - | -   | - | - | - | -   | - |
| APOBR      | 3 | 1 | - | -   | - | - | - | -   | - |
| ARHGAP10   | 3 | 1 | - | -   | - | - | - | -   | - |
| ARHGEF40   | 3 | 2 | - | -   | - | - | - | -   | - |
| ASB18      | 3 | 0 | - | -   | - | - | - | -   | - |
| ASPSCR1    | 3 | 2 | - | -   | - | - | - | -   | - |
| ATP13A5    | 3 | 0 | - | -   | - | - | - | -   | - |
| ATP1A4     | 3 | 5 | - | -   | - | - | - | -   | - |
| BANK1      | 3 | 1 | - | -   | - | - | - | -   | - |
| BBS12      | 3 | 2 | 1 | -   | - | - | - | -   | - |
| BTBD11     | 3 | 0 | - | -   | - | - | - | -   | - |
| BUB1B      | 3 | 0 | 1 | Yes | - | - | - | Yes | - |
| C16orf89   | 3 | 0 | - | -   | - | - | - | -   | - |
| HEATR9     | 3 | 0 | - | -   | - | - | - | -   | - |
| C17orf80   | 3 | 2 | - | -   | - | - | - | -   | - |
| TBC1D32    | 3 | 4 | - | -   | - | - | - | -   | - |
| C8A        | 3 | 2 | - | -   | - | - | - | -   | - |
| C9orf131   | 3 | 1 | - | -   | - | - | - | -   | - |
| C9orf84    | 3 | 0 | - | -   | - | - | - | -   | - |
| CAP52      | 3 | 2 | - | -   | - | - | - | -   | - |
| CARD14     | 3 | 3 | - | -   | - | - | - | -   | - |
| CARNS1     | 3 | 0 | - | -   | - | - | - | -   | - |
| CATSPER3   | 3 | 0 | - | -   | - | - | - | -   | - |
| CBX2       | 3 | 2 | - | -   | - | - | - | -   | - |
| CCDC129    | 3 | 1 | - | -   | - | - | - | -   | - |
| CCDC40     | 3 | 0 | 1 | -   | - | - | - | -   | - |
| CD101      | 3 | 2 | - | -   | - | - | - | -   | - |
| CEP250     | 3 | 1 | - | -   | - | - | - | -   | - |
| CHRNE      | 3 | 1 | - | -   | - | - | - | -   | - |
| CIDEB      | 3 | 1 | - | -   | - | - | - | -   | - |
| CLCA1      | 3 | 1 | 1 | -   | - | - | - | -   | - |
| CLCNKA     | 3 | 2 | - | -   | - | - | - | -   | - |
| CLIC3      | 3 | 1 | - | -   | - | - | - | -   | - |
| CLIP1      | 3 | 0 | - | -   | - | - | - | -   | - |
| COL6A6     | 3 | 3 | - | -   | - | - | - | -   | - |
| CPZ        | 3 | 1 | - | -   | - | - | - | -   | - |
| CREB3L3    | 3 | 1 | - | -   | - | - | - | -   | - |
| CSRP2BP    | 3 | 0 | - | -   | - | - | - | -   | - |
| DENND4A    | 3 | 0 | - | -   | - | - | - | -   | - |
| DNAH11     | 3 | 3 | 1 | -   | - | - | - | -   | - |
| DNAH17     | 3 | 3 | - | -   | - | - | - | -   | - |
| DNAH7      | 3 | 4 | 3 | -   | - | - | - | -   | - |
| DNAJC28    | 3 | 1 | - | -   | - | - | - | -   | - |
| DUOX1      | 3 | 1 | - | -   | - | - | - | -   | - |
| DUSP27     | 3 | 2 | - | -   | - | - | - | -   | - |
| ECT2L      | 3 | 0 | - | -   | - | - | - | -   | - |
| EFCAB6     | 3 | 6 | - | -   | - | - | - | -   | - |
| ADGRE2     | 3 | 5 | - | -   | - | - | - | -   | - |
| EPX        | 3 | 3 | - | -   | - | - | - | -   | - |
| ERAP2      | 3 | 2 | - | -   | - | - | - | -   | - |
| ERVV-2     | 3 | 0 | - | -   | - | - | - | -   | - |
| ESCO2      | 3 | 1 | - | Yes | - | - | - | -   | - |
| EYS        | 3 | 5 | 1 | -   | - | - | - | -   | - |
| FAM161A    | 3 | 1 | - | -   | - | - | - | -   | - |
| FAM185A    | 3 | 0 | - | -   | - | - | - | -   | - |
| FANCC      | 3 | 0 | - | Yes | - | - | - | Yes | - |
| FANCM      | 3 | 3 | 2 | Yes | - | - | - | Yes | - |
| FCRL6      | 3 | 2 | - | -   | - | - | - | -   | - |
| FER1L6     | 3 | 1 | - | -   | - | - | - | -   | - |
| GALK2      | 3 | 0 | - | -   | - | - | - | -   | - |
| GJB2       | 3 | 3 | - | -   | - | - | - | -   | - |
| GPIBA      | 3 | 1 | - | -   | - | - | - | -   | - |
| GPBAR1     | 3 | 0 | - | -   | - | - | - | -   | - |
| HEATR6     | 3 | 3 | - | -   | - | - | - | -   | - |
| HEMGN      | 3 | 1 | - | -   | - | - | - | -   | - |
| HGFAC      | 3 | 1 | - | -   | - | - | - | -   | - |
| IFNAR2     | 3 | 0 | - | -   | - | - | - | -   | - |
| IGSF10     | 3 | 6 | 1 | -   | - | - | - | -   | - |
| IL12RB2    | 3 | 1 | - | -   | - | - | - | -   | - |
| IQCE       | 3 | 1 | 1 | -   | - | - | - | -   | - |
| KIAA0141   | 3 | 1 | - | -   | - | - | - | -   | - |
| KIAA1217   | 3 | 1 | - | -   | - | - | - | -   | - |
| KIAA1683   | 3 | 4 | - | -   | - | - | - | -   | - |
| LAMB4      | 3 | 4 | - | -   | - | - | - | -   | - |
| LARS       | 3 | 2 | - | -   | - | - | - | -   | - |
| LEKR1      | 3 | 0 | - | -   | - | - | - | -   | - |
| LIME1      | 3 | 0 | - | -   | - | - | - | -   | - |
| LOC402160  | 3 | 0 | - | -   | - | - | - | -   | - |
| LRP1B      | 3 | 3 | 3 | -   | - | - | - | -   | - |
| LRRC26     | 3 | 0 | - | -   | - | - | - | -   | - |
| LRR1Q1     | 3 | 6 | 1 | -   | - | - | - | -   | - |
| LTBP1      | 3 | 0 | 1 | -   | - | - | - | -   | - |
| L175-CD302 | 3 | 1 | - | -   | - | - | - | -   | - |
| LZTR1      | 3 | 1 | - | -   | - | - | - | -   | - |
| MAMDC4     | 3 | 4 | - | -   | - | - | - | -   | - |
| MAN2A2     | 3 | 0 | - | -   | - | - | - | -   | - |
| MAN2C1     | 3 | 2 | - | -   | - | - | - | -   | - |
| MFI2       | 3 | 1 | - | -   | - | - | - | -   | - |
| MMP9       | 3 | 1 | - | -   | - | - | - | -   | - |



|           |   |   |   |     |     |     |     |     |     |
|-----------|---|---|---|-----|-----|-----|-----|-----|-----|
| AGR3      | 2 | 2 | - | -   | -   | -   | -   | -   | -   |
| AIFM3     | 2 | 1 | - | -   | -   | -   | -   | -   | -   |
| AIRE      | 2 | 1 | - | -   | -   | -   | -   | -   | -   |
| AKAP12    | 2 | 0 | - | -   | -   | -   | -   | -   | -   |
| AKR1D1    | 2 | 3 | - | -   | -   | -   | -   | -   | -   |
| ALDH16A1  | 2 | 2 | - | -   | -   | -   | -   | -   | -   |
| ALDH3A1   | 2 | 1 | - | -   | -   | -   | -   | -   | -   |
| ALDH3B1   | 2 | 0 | 1 | -   | -   | -   | -   | -   | -   |
| ALG13     | 2 | 0 | - | -   | -   | -   | -   | -   | -   |
| ALLC      | 2 | 0 | - | -   | -   | -   | -   | -   | -   |
| ALMS1     | 2 | 4 | - | -   | -   | -   | -   | -   | -   |
| ALOX5AP   | 2 | 0 | - | -   | -   | -   | -   | -   | -   |
| ALPK2     | 2 | 4 | - | -   | -   | -   | -   | -   | -   |
| ALPK3     | 2 | 1 | 1 | -   | -   | -   | -   | -   | -   |
| ALS2CR12  | 2 | 2 | - | -   | -   | -   | -   | -   | -   |
| CARF      | 2 | 0 | - | -   | -   | -   | -   | -   | -   |
| AMHR2     | 2 | 1 | - | -   | -   | -   | -   | -   | -   |
| AMICA1    | 2 | 2 | - | -   | -   | -   | -   | -   | -   |
| AMPD3     | 2 | 1 | - | -   | -   | -   | -   | -   | -   |
| ANGPTL4   | 2 | 2 | - | -   | -   | -   | -   | -   | -   |
| ANGPTL5   | 2 | 3 | - | -   | -   | -   | -   | -   | -   |
| ANKK1     | 2 | 3 | - | -   | -   | -   | -   | -   | -   |
| ANKRD13D  | 2 | 0 | - | -   | -   | -   | -   | -   | -   |
| ANKRD42   | 2 | 1 | - | -   | -   | -   | -   | -   | -   |
| ANKZF1    | 2 | 2 | - | -   | -   | -   | -   | -   | -   |
| ANO7      | 2 | 2 | 1 | -   | -   | -   | -   | -   | -   |
| ANXA5     | 2 | 0 | - | -   | -   | -   | -   | -   | -   |
| AOX1      | 2 | 6 | - | -   | -   | -   | -   | -   | -   |
| AP1G2     | 2 | 1 | - | -   | -   | -   | -   | -   | -   |
| APOL5     | 2 | 2 | - | -   | -   | -   | -   | -   | -   |
| APPL2     | 2 | 3 | - | -   | -   | -   | -   | -   | -   |
| LVRN      | 2 | 2 | - | -   | -   | -   | -   | -   | -   |
| ARHGAP11A | 2 | 0 | - | -   | -   | -   | -   | -   | -   |
| ARHGAP25  | 2 | 0 | - | -   | -   | -   | -   | -   | -   |
| ARHGAP9   | 2 | 0 | - | -   | -   | -   | -   | -   | -   |
| ARHGEF1   | 2 | 0 | 1 | -   | -   | -   | -   | -   | -   |
| ARHGEF10  | 2 | 2 | - | -   | -   | -   | -   | -   | -   |
| ARHGEF37  | 2 | 2 | - | -   | -   | -   | -   | -   | -   |
| ARL10     | 2 | 0 | - | -   | -   | -   | -   | -   | -   |
| ARSA      | 2 | 1 | - | -   | -   | -   | -   | -   | -   |
| ASB11     | 2 | 0 | - | -   | -   | -   | -   | -   | -   |
| ASB13     | 2 | 0 | - | -   | -   | -   | -   | -   | -   |
| ASPG      | 2 | 2 | - | -   | -   | -   | -   | -   | -   |
| ASPM      | 2 | 1 | - | -   | -   | -   | -   | -   | -   |
| ASTE1     | 2 | 2 | - | Yes | -   | -   | -   | -   | -   |
| ASXL3     | 2 | 0 | - | -   | -   | -   | -   | -   | -   |
| ATF7IP2   | 2 | 0 | - | -   | -   | -   | -   | -   | -   |
| ATG2B     | 2 | 1 | - | -   | -   | -   | -   | -   | -   |
| ATG9B     | 2 | 1 | - | -   | -   | -   | -   | -   | -   |
| ATP2C2    | 2 | 3 | - | -   | -   | -   | -   | -   | -   |
| ATP6V0A4  | 2 | 0 | - | -   | -   | -   | -   | -   | -   |
| ATR       | 2 | 5 | - | Yes | -   | -   | -   | -   | -   |
| B3GNTL1   | 2 | 1 | - | -   | -   | -   | -   | -   | -   |
| BBS4      | 2 | 0 | - | -   | -   | -   | -   | -   | -   |
| BEST3     | 2 | 2 | - | -   | -   | -   | -   | -   | -   |
| BIRC6     | 2 | 1 | 1 | -   | -   | -   | -   | -   | -   |
| BLVRB     | 2 | 0 | - | -   | -   | -   | -   | -   | -   |
| BNIP1     | 2 | 1 | - | -   | -   | -   | -   | -   | -   |
| BRC1A1    | 2 | 2 | - | Yes | Yes | Yes | Yes | Yes | -   |
| BRICD5    | 2 | 2 | - | -   | -   | -   | -   | -   | -   |
| BRIP1     | 2 | 4 | - | Yes | -   | -   | -   | Yes | -   |
| BSG       | 2 | 0 | - | -   | -   | -   | -   | -   | -   |
| BTN2A2    | 2 | 2 | - | -   | -   | -   | -   | -   | -   |
| C11orf16  | 2 | 1 | - | -   | -   | -   | -   | -   | -   |
| C11orf40  | 2 | 2 | - | -   | -   | -   | -   | -   | -   |
| C11orf42  | 2 | 1 | - | -   | -   | -   | -   | -   | -   |
| C11orf49  | 2 | 1 | - | -   | -   | -   | -   | -   | -   |
| RIT1A1    | 2 | 1 | - | -   | -   | -   | -   | -   | -   |
| C14orf159 | 2 | 3 | - | -   | -   | -   | -   | -   | -   |
| C16orf13  | 2 | 0 | - | -   | -   | -   | -   | -   | -   |
| C16orf58  | 2 | 1 | - | -   | -   | -   | -   | -   | -   |
| C1orf100  | 2 | 0 | 1 | -   | -   | -   | -   | -   | -   |
| C1orf101  | 2 | 2 | - | -   | -   | -   | -   | -   | -   |
| C1orf112  | 2 | 1 | - | -   | -   | -   | -   | -   | -   |
| C1orf116  | 2 | 0 | - | -   | -   | -   | -   | -   | -   |
| C1orf177  | 2 | 2 | - | -   | -   | -   | -   | -   | -   |
| C1orf204  | 2 | 0 | - | -   | -   | -   | -   | -   | -   |
| C1QTNF7   | 2 | 0 | - | -   | -   | -   | -   | -   | -   |
| C21orf58  | 2 | 1 | - | -   | -   | -   | -   | -   | -   |
| C22orf23  | 2 | 1 | - | -   | -   | -   | -   | -   | -   |
| PRR34     | 2 | 0 | - | -   | -   | -   | -   | -   | -   |
| C22orf29  | 2 | 0 | - | -   | -   | -   | -   | -   | -   |
| C2orf16   | 2 | 0 | - | -   | -   | -   | -   | -   | -   |
| ZGRF1     | 2 | 3 | - | -   | -   | -   | -   | -   | -   |
| C4orf29   | 2 | 2 | - | -   | -   | -   | -   | -   | -   |
| C5orf45   | 2 | 2 | - | -   | -   | -   | -   | -   | -   |
| C6orf1    | 2 | 1 | - | -   | -   | -   | -   | -   | -   |
| C7orf72   | 2 | 0 | - | -   | -   | -   | -   | -   | -   |
| C7orf76   | 2 | 0 | - | -   | -   | -   | -   | -   | -   |
| C8orf34   | 2 | 1 | - | -   | -   | -   | -   | -   | Yes |
| C9orf116  | 2 | 0 | - | -   | -   | -   | -   | -   | -   |
| C9orf156  | 2 | 1 | - | -   | -   | -   | -   | -   | -   |
| C9orf3    | 2 | 0 | - | -   | -   | -   | -   | -   | -   |
| CABP2     | 2 | 1 | 1 | -   | -   | -   | -   | -   | -   |
| CADPS2    | 2 | 0 | - | -   | -   | -   | -   | -   | -   |
| CALCR     | 2 | 2 | 1 | -   | -   | -   | -   | -   | -   |
| CAPN12    | 2 | 0 | - | -   | -   | -   | -   | -   | -   |
| CAPN3     | 2 | 0 | - | -   | -   | -   | -   | -   | -   |
| CAPNS2    | 2 | 1 | - | -   | -   | -   | -   | -   | -   |
| CATSPER4  | 2 | 1 | - | -   | -   | -   | -   | -   | -   |
| CBLB      | 2 | 0 | - | -   | -   | -   | -   | -   | -   |
| CC2D2B    | 2 | 1 | - | -   | -   | -   | -   | -   | -   |
| CFAP36    | 2 | 2 | - | -   | -   | -   | -   | -   | -   |
| CCDC110   | 2 | 0 | - | -   | -   | -   | -   | -   | -   |
| CCDC113   | 2 | 0 | - | -   | -   | -   | -   | -   | -   |
| VPS50     | 2 | 0 | - | -   | -   | -   | -   | -   | -   |

|             |   |   |   |   |     |   |   |   |   |
|-------------|---|---|---|---|-----|---|---|---|---|
| CCDC14      | 2 | 1 | - | - | -   | - | - | - | - |
| CCDC154     | 2 | 1 | - | - | -   | - | - | - | - |
| CCDC170     | 2 | 1 | - | - | -   | - | - | - | - |
| CCDC171     | 2 | 2 | - | - | -   | - | - | - | - |
| CCDC38      | 2 | 3 | - | - | -   | - | - | - | - |
| CCDC42      | 2 | 0 | - | - | -   | - | - | - | - |
| CCDC59      | 2 | 0 | - | - | -   | - | - | - | - |
| CCDC60      | 2 | 1 | - | - | -   | - | - | - | - |
| CCDC66      | 2 | 7 | - | - | -   | - | - | - | - |
| CCDC84      | 2 | 1 | - | - | -   | - | - | - | - |
| CD109       | 2 | 5 | - | - | -   | - | - | - | - |
| CD177       | 2 | 0 | 1 | - | -   | - | - | - | - |
| CD180       | 2 | 1 | - | - | -   | - | - | - | - |
| CD6         | 2 | 0 | - | - | -   | - | - | - | - |
| CDC45       | 2 | 0 | - | - | Yes | - | - | - | - |
| CDC7        | 2 | 0 | 1 | - | -   | - | - | - | - |
| CDK5RAP3    | 2 | 1 | - | - | -   | - | - | - | - |
| CDKL3       | 2 | 0 | - | - | -   | - | - | - | - |
| CEACAM1     | 2 | 1 | - | - | -   | - | - | - | - |
| CECR5       | 2 | 1 | - | - | -   | - | - | - | - |
| CENPF       | 2 | 3 | - | - | -   | - | - | - | - |
| CENPO       | 2 | 2 | - | - | -   | - | - | - | - |
| CEP104      | 2 | 2 | 1 | - | -   | - | - | - | - |
| CEP152      | 2 | 1 | - | - | -   | - | - | - | - |
| CEP192      | 2 | 3 | - | - | -   | - | - | - | - |
| CES2        | 2 | 1 | - | - | -   | - | - | - | - |
| CHD1L       | 2 | 3 | - | - | Yes | - | - | - | - |
| CHD3        | 2 | 0 | - | - | -   | - | - | - | - |
| CHID1       | 2 | 1 | - | - | -   | - | - | - | - |
| CHST15      | 2 | 1 | - | - | -   | - | - | - | - |
| CISD3       | 2 | 0 | - | - | -   | - | - | - | - |
| CIZ1        | 2 | 0 | - | - | -   | - | - | - | - |
| CKM         | 2 | 0 | - | - | -   | - | - | - | - |
| CLCNKB      | 2 | 2 | - | - | -   | - | - | - | - |
| CLDN24      | 2 | 0 | - | - | -   | - | - | - | - |
| CMYA5       | 2 | 3 | - | - | -   | - | - | - | - |
| CNGB3       | 2 | 0 | - | - | -   | - | - | - | - |
| CNKSR1      | 2 | 3 | - | - | -   | - | - | - | - |
| CNTN4       | 2 | 1 | - | - | -   | - | - | - | - |
| COA1        | 2 | 1 | - | - | -   | - | - | - | - |
| COL16A1     | 2 | 0 | - | - | -   | - | - | - | - |
| COL20A1     | 2 | 3 | - | - | -   | - | - | - | - |
| COL22A1     | 2 | 1 | - | - | -   | - | - | - | - |
| COL28A1     | 2 | 1 | - | - | -   | - | - | - | - |
| COL9A1      | 2 | 3 | - | - | -   | - | - | - | - |
| COP22       | 2 | 0 | - | - | -   | - | - | - | - |
| CORIN       | 2 | 1 | - | - | -   | - | - | - | - |
| CORO7-PAM16 | 2 | 2 | - | - | -   | - | - | - | - |
| CPA2        | 2 | 1 | - | - | -   | - | - | - | - |
| CPQ         | 2 | 1 | - | - | -   | - | - | - | - |
| CPXM2       | 2 | 0 | - | - | -   | - | - | - | - |
| CR3         | 2 | 0 | - | - | -   | - | - | - | - |
| CRIP2       | 2 | 1 | - | - | -   | - | - | - | - |
| CRY1        | 2 | 0 | - | - | Yes | - | - | - | - |
| CRYBG3      | 2 | 0 | - | - | -   | - | - | - | - |
| CRYL1       | 2 | 0 | - | - | -   | - | - | - | - |
| CRYZ        | 2 | 1 | - | - | -   | - | - | - | - |
| CSNK2A3     | 2 | 0 | - | - | -   | - | - | - | - |
| CSRNP1      | 2 | 0 | - | - | -   | - | - | - | - |
| CTH         | 2 | 1 | - | - | -   | - | - | - | - |
| CTNNA3      | 2 | 0 | - | - | -   | - | - | - | - |
| CTTNBP2     | 2 | 1 | - | - | -   | - | - | - | - |
| CXCR1       | 2 | 0 | - | - | -   | - | - | - | - |
| CYHR1       | 2 | 1 | - | - | -   | - | - | - | - |
| CYP1A2      | 2 | 1 | - | - | -   | - | - | - | - |
| CYP27A1     | 2 | 1 | - | - | -   | - | - | - | - |
| CYP4A11     | 2 | 2 | - | - | -   | - | - | - | - |
| DAO         | 2 | 0 | - | - | -   | - | - | - | - |
| ACKR1       | 2 | 1 | - | - | -   | - | - | - | - |
| DCBLD2      | 2 | 0 | - | - | -   | - | - | - | - |
| DCDC2B      | 2 | 0 | - | - | -   | - | - | - | - |
| DCLRE1C     | 2 | 0 | - | - | Yes | - | - | - | - |
| DCT         | 2 | 0 | - | - | -   | - | - | - | - |
| DCXR        | 2 | 2 | - | - | -   | - | - | - | - |
| DDX60L      | 2 | 3 | 1 | - | -   | - | - | - | - |
| DENND1C     | 2 | 0 | - | - | -   | - | - | - | - |
| DENND4B     | 2 | 1 | - | - | -   | - | - | - | - |
| DENND4C     | 2 | 0 | - | - | -   | - | - | - | - |
| DGKG        | 2 | 0 | - | - | -   | - | - | - | - |
| DGKH        | 2 | 1 | - | - | -   | - | - | - | - |
| DGKQ        | 2 | 1 | - | - | -   | - | - | - | - |
| DHODH       | 2 | 0 | - | - | -   | - | - | - | - |
| DHRS7B      | 2 | 2 | - | - | -   | - | - | - | - |
| DHX57       | 2 | 2 | 1 | - | -   | - | - | - | - |
| DIO2        | 2 | 0 | - | - | -   | - | - | - | - |
| DIS3L       | 2 | 2 | - | - | -   | - | - | - | - |
| DLEC1       | 2 | 3 | - | - | -   | - | - | - | - |
| DMBT1       | 2 | 0 | 1 | - | -   | - | - | - | - |
| DMGDH       | 2 | 1 | - | - | -   | - | - | - | - |
| DNAH1       | 2 | 3 | - | - | -   | - | - | - | - |
| DNAH2       | 2 | 1 | - | - | -   | - | - | - | - |
| DNAH5       | 2 | 6 | 1 | - | -   | - | - | - | - |
| DNAJC21     | 2 | 2 | - | - | -   | - | - | - | - |
| DNAJC3      | 2 | 0 | - | - | -   | - | - | - | - |
| DNASE1      | 2 | 1 | - | - | -   | - | - | - | - |
| DOC2A       | 2 | 0 | - | - | -   | - | - | - | - |
| DOCK7       | 2 | 0 | - | - | -   | - | - | - | - |
| DOK3        | 2 | 1 | 1 | - | -   | - | - | - | - |
| DSC1        | 2 | 0 | - | - | -   | - | - | - | - |
| DSC3        | 2 | 3 | - | - | -   | - | - | - | - |
| DSN1        | 2 | 1 | - | - | -   | - | - | - | - |
| DTHD1       | 2 | 2 | - | - | -   | - | - | - | - |
| DUOX2       | 2 | 0 | - | - | -   | - | - | - | - |
| DYNC2H1     | 2 | 0 | 2 | - | -   | - | - | - | - |
| EBPL        | 2 | 1 | - | - | -   | - | - | - | - |
| EFCAB12     | 2 | 2 | - | - | -   | - | - | - | - |

|          |   |   |   |     |   |   |   |     |   |
|----------|---|---|---|-----|---|---|---|-----|---|
| EFHB     | 2 | 2 | - | -   | - | - | - | -   | - |
| EFR3A    | 2 | 0 | - | -   | - | - | - | -   | - |
| EFTUD1   | 2 | 1 | - | -   | - | - | - | -   | - |
| ELAC2    | 2 | 0 | - | -   | - | - | - | -   | - |
| EMC1     | 2 | 4 | - | -   | - | - | - | -   | - |
| EME2     | 2 | 1 | - | Yes | - | - | - | -   | - |
| EML6     | 2 | 1 | - | -   | - | - | - | -   | - |
| ENKD1    | 2 | 2 | - | -   | - | - | - | -   | - |
| ENO1     | 2 | 1 | - | -   | - | - | - | -   | - |
| EPB41L4A | 2 | 1 | - | -   | - | - | - | -   | - |
| EPHA1    | 2 | 0 | - | -   | - | - | - | -   | - |
| EPHA10   | 2 | 2 | - | -   | - | - | - | -   | - |
| EPHA2    | 2 | 0 | - | -   | - | - | - | -   | - |
| EPYC     | 2 | 0 | - | -   | - | - | - | -   | - |
| ERCC2    | 2 | 1 | - | Yes | - | - | - | Yes | - |
| EXD3     | 2 | 1 | - | -   | - | - | - | -   | - |
| EXO1     | 2 | 2 | - | Yes | - | - | - | -   | - |
| FAAH2    | 2 | 1 | - | -   | - | - | - | -   | - |
| FAM111A  | 2 | 1 | - | -   | - | - | - | -   | - |
| FAM111B  | 2 | 2 | 1 | -   | - | - | - | -   | - |
| FAM160A1 | 2 | 1 | - | -   | - | - | - | -   | - |
| FAM184B  | 2 | 1 | - | -   | - | - | - | -   | - |
| FAM186B  | 2 | 1 | - | -   | - | - | - | -   | - |
| FAM188B  | 2 | 1 | - | -   | - | - | - | -   | - |
| ERIC6B   | 2 | 1 | - | -   | - | - | - | -   | - |
| FAM200B  | 2 | 3 | - | -   | - | - | - | -   | - |
| FAM216B  | 2 | 0 | - | -   | - | - | - | -   | - |
| FAM228B  | 2 | 0 | - | -   | - | - | - | -   | - |
| FAM26D   | 2 | 1 | - | -   | - | - | - | -   | - |
| FAM71A   | 2 | 0 | - | -   | - | - | - | -   | - |
| FAM81B   | 2 | 1 | - | -   | - | - | - | -   | - |
| FAM92B   | 2 | 1 | - | -   | - | - | - | -   | - |
| FANCF    | 2 | 1 | - | Yes | - | - | - | Yes | - |
| FAT3     | 2 | 0 | - | -   | - | - | - | -   | - |
| FBF1     | 2 | 0 | - | -   | - | - | - | -   | - |
| FBN3     | 2 | 2 | - | -   | - | - | - | -   | - |
| FBXL21   | 2 | 2 | - | -   | - | - | - | -   | - |
| FBXW10   | 2 | 1 | - | -   | - | - | - | -   | - |
| FCER2    | 2 | 0 | - | -   | - | - | - | -   | - |
| FDXACB1  | 2 | 0 | - | -   | - | - | - | -   | - |
| FLJ22184 | 2 | 0 | - | -   | - | - | - | -   | - |
| FNI      | 2 | 1 | - | -   | - | - | - | -   | - |
| FNBP1L   | 2 | 0 | - | -   | - | - | - | -   | - |
| FOXF2    | 2 | 0 | - | -   | - | - | - | -   | - |
| FOXJ2    | 2 | 0 | - | -   | - | - | - | -   | - |
| FPGT     | 2 | 1 | - | -   | - | - | - | -   | - |
| FSIP2    | 2 | 1 | - | -   | - | - | - | -   | - |
| FUT4     | 2 | 1 | - | -   | - | - | - | -   | - |
| GABRR2   | 2 | 0 | - | -   | - | - | - | -   | - |
| GANC     | 2 | 1 | 1 | -   | - | - | - | -   | - |
| GAPDH    | 2 | 0 | - | -   | - | - | - | -   | - |
| GAS2L2   | 2 | 1 | - | -   | - | - | - | -   | - |
| GBGT1    | 2 | 1 | - | -   | - | - | - | -   | - |
| GDPD4    | 2 | 0 | - | -   | - | - | - | -   | - |
| GFR44    | 2 | 0 | - | -   | - | - | - | -   | - |
| GGT7     | 2 | 0 | - | -   | - | - | - | -   | - |
| GIMAP6   | 2 | 0 | - | -   | - | - | - | -   | - |
| GIN1     | 2 | 0 | - | -   | - | - | - | -   | - |
| GJB6     | 2 | 0 | - | -   | - | - | - | -   | - |
| GLB1L3   | 2 | 0 | - | -   | - | - | - | -   | - |
| GLIPR1L2 | 2 | 0 | - | -   | - | - | - | -   | - |
| GNL2     | 2 | 1 | - | -   | - | - | - | -   | - |
| GNPTAB   | 2 | 1 | - | -   | - | - | - | -   | - |
| GPATCH3  | 2 | 2 | - | -   | - | - | - | -   | - |
| ADGRG7   | 2 | 0 | - | -   | - | - | - | -   | - |
| GPR152   | 2 | 0 | - | -   | - | - | - | -   | - |
| GPR179   | 2 | 3 | - | -   | - | - | - | -   | - |
| ADGRG3   | 2 | 0 | - | -   | - | - | - | -   | - |
| GPRIN3   | 2 | 0 | - | -   | - | - | - | -   | - |
| GRAMD1C  | 2 | 2 | - | -   | - | - | - | -   | - |
| GRIN2C   | 2 | 1 | - | -   | - | - | - | -   | - |
| GRIN3B   | 2 | 4 | - | -   | - | - | - | -   | - |
| GRM2     | 2 | 0 | - | -   | - | - | - | -   | - |
| GSS      | 2 | 1 | - | -   | - | - | - | -   | - |
| GSTM2    | 2 | 1 | - | -   | - | - | - | -   | - |
| GTSE1    | 2 | 0 | - | -   | - | - | - | -   | - |
| GUCY2C   | 2 | 1 | - | -   | - | - | - | -   | - |
| GUCY2D   | 2 | 0 | - | -   | - | - | - | -   | - |
| GUCY2F   | 2 | 1 | - | -   | - | - | - | -   | - |
| HACL1    | 2 | 2 | 1 | -   | - | - | - | -   | - |
| HAS1     | 2 | 0 | - | -   | - | - | - | -   | - |
| HCAR3    | 2 | 0 | - | -   | - | - | - | -   | - |
| HEATR4   | 2 | 2 | - | -   | - | - | - | -   | - |
| HELQ     | 2 | 2 | - | -   | - | - | - | -   | - |
| HERCS    | 2 | 3 | - | -   | - | - | - | -   | - |
| HIP1R    | 2 | 1 | 1 | -   | - | - | - | -   | - |
| HIST1H3J | 2 | 0 | - | -   | - | - | - | -   | - |
| HIST1H4B | 2 | 0 | 1 | -   | - | - | - | -   | - |
| HOOK1    | 2 | 0 | - | -   | - | - | - | -   | - |
| HOOK2    | 2 | 0 | - | -   | - | - | - | -   | - |
| HOXD10   | 2 | 0 | - | -   | - | - | - | -   | - |
| HSD3B7   | 2 | 1 | - | -   | - | - | - | -   | - |
| HSPA9    | 2 | 0 | 1 | -   | - | - | - | -   | - |
| HTR5A    | 2 | 0 | - | -   | - | - | - | -   | - |
| HYAL4    | 2 | 0 | - | -   | - | - | - | -   | - |
| HYDIN    | 2 | 0 | 1 | -   | - | - | - | -   | - |
| LAH1     | 2 | 0 | 1 | -   | - | - | - | -   | - |
| ID12     | 2 | 0 | - | -   | - | - | - | -   | - |
| IDUA     | 2 | 0 | - | -   | - | - | - | -   | - |
| IFT1     | 2 | 1 | - | -   | - | - | - | -   | - |
| IFT140   | 2 | 0 | - | -   | - | - | - | -   | - |
| IFT88    | 2 | 0 | - | -   | - | - | - | -   | - |
| IL17F    | 2 | 0 | - | -   | - | - | - | -   | - |
| IL17RD   | 2 | 2 | - | -   | - | - | - | -   | - |
| IL1F10   | 2 | 1 | - | -   | - | - | - | -   | - |
| ILDRI    | 2 | 0 | 1 | -   | - | - | - | -   | - |

|           |   |   |   |   |     |   |   |   |   |
|-----------|---|---|---|---|-----|---|---|---|---|
| INPP5K    | 2 | 1 | - | - | -   | - | - | - | - |
| INSRR     | 2 | 1 | - | - | -   | - | - | - | - |
| IQCC      | 2 | 3 | - | - | -   | - | - | - | - |
| IQCD      | 2 | 0 | - | - | -   | - | - | - | - |
| IQUB      | 2 | 0 | - | - | -   | - | - | - | - |
| IRAK2     | 2 | 0 | - | - | -   | - | - | - | - |
| ITFG3     | 2 | 0 | - | - | -   | - | - | - | - |
| ITGA2     | 2 | 0 | - | - | -   | - | - | - | - |
| ITGAD     | 2 | 1 | - | - | -   | - | - | - | - |
| ITGB6     | 2 | 0 | - | - | -   | - | - | - | - |
| ITIH2     | 2 | 2 | - | - | -   | - | - | - | - |
| IVL       | 2 | 0 | 1 | - | -   | - | - | - | - |
| JMJD4     | 2 | 0 | - | - | -   | - | - | - | - |
| JRK       | 2 | 0 | - | - | -   | - | - | - | - |
| JSRP1     | 2 | 0 | - | - | -   | - | - | - | - |
| KANK2     | 2 | 0 | - | - | -   | - | - | - | - |
| KANSL1L   | 2 | 1 | - | - | -   | - | - | - | - |
| KAZALD1   | 2 | 0 | - | - | -   | - | - | - | - |
| KBTBD12   | 2 | 0 | - | - | -   | - | - | - | - |
| KBTBD7    | 2 | 0 | - | - | -   | - | - | - | - |
| KCNAB3    | 2 | 0 | - | - | -   | - | - | - | - |
| KCNV4     | 2 | 0 | - | - | -   | - | - | - | - |
| KCNJ1     | 2 | 1 | - | - | -   | - | - | - | - |
| KCNMA1    | 2 | 2 | - | - | -   | - | - | - | - |
| KDEL3     | 2 | 1 | - | - | -   | - | - | - | - |
| KDM3A     | 2 | 0 | 1 | - | -   | - | - | - | - |
| KEL       | 2 | 4 | - | - | -   | - | - | - | - |
| KIAA0100  | 2 | 1 | - | - | -   | - | - | - | - |
| KIAA0196  | 2 | 0 | - | - | -   | - | - | - | - |
| KIAA0226L | 2 | 0 | - | - | -   | - | - | - | - |
| KIAA0408  | 2 | 0 | - | - | -   | - | - | - | - |
| KIAA0556  | 2 | 3 | 1 | - | -   | - | - | - | - |
| KIAA0586  | 2 | 1 | - | - | -   | - | - | - | - |
| KIAA1407  | 2 | 3 | 1 | - | -   | - | - | - | - |
| KIAA1586  | 2 | 1 | - | - | -   | - | - | - | - |
| CEP295    | 2 | 1 | - | - | -   | - | - | - | - |
| KIF14     | 2 | 1 | - | - | -   | - | - | - | - |
| KIF16B    | 2 | 1 | - | - | -   | - | - | - | - |
| KIF7      | 2 | 1 | - | - | -   | - | - | - | - |
| KLHL33    | 2 | 0 | - | - | -   | - | - | - | - |
| KLHL35    | 2 | 0 | - | - | -   | - | - | - | - |
| KLHL6     | 2 | 0 | - | - | -   | - | - | - | - |
| KRBA1     | 2 | 0 | - | - | -   | - | - | - | - |
| KRR1      | 2 | 0 | - | - | -   | - | - | - | - |
| KRT4      | 2 | 2 | - | - | -   | - | - | - | - |
| KRT79     | 2 | 0 | - | - | -   | - | - | - | - |
| KRT9      | 2 | 0 | - | - | -   | - | - | - | - |
| KRTAP6-2  | 2 | 0 | - | - | -   | - | - | - | - |
| L2HGDH    | 2 | 0 | - | - | -   | - | - | - | - |
| LAMB2     | 2 | 0 | - | - | -   | - | - | - | - |
| LANCL1    | 2 | 0 | - | - | -   | - | - | - | - |
| LARP7     | 2 | 1 | 1 | - | -   | - | - | - | - |
| LCTL      | 2 | 0 | - | - | -   | - | - | - | - |
| LDHB      | 2 | 0 | - | - | -   | - | - | - | - |
| P3H2      | 2 | 1 | - | - | -   | - | - | - | - |
| LGR4      | 2 | 0 | - | - | -   | - | - | - | - |
| LHCGR     | 2 | 2 | - | - | -   | - | - | - | - |
| LIG3      | 2 | 0 | - | - | Yes | - | - | - | - |
| LILRB5    | 2 | 0 | - | - | -   | - | - | - | - |
| LMF2      | 2 | 1 | - | - | -   | - | - | - | - |
| LMLN      | 2 | 1 | 1 | - | -   | - | - | - | - |
| LMOD3     | 2 | 1 | - | - | -   | - | - | - | - |
| LONP2     | 2 | 2 | - | - | -   | - | - | - | - |
| LPO       | 2 | 1 | - | - | -   | - | - | - | - |
| LRRC14B   | 2 | 3 | - | - | -   | - | - | - | - |
| LRRCC1    | 2 | 1 | - | - | -   | - | - | - | - |
| LRRK1     | 2 | 0 | - | - | -   | - | - | - | - |
| LTA4H     | 2 | 1 | - | - | -   | - | - | - | - |
| LTK       | 2 | 0 | - | - | -   | - | - | - | - |
| LUC7L2    | 2 | 0 | - | - | -   | - | - | - | - |
| MAATS1    | 2 | 0 | - | - | -   | - | - | - | - |
| MADCAM1   | 2 | 1 | - | - | -   | - | - | - | - |
| MANBA     | 2 | 0 | - | - | -   | - | - | - | - |
| MAP3K19   | 2 | 0 | - | - | -   | - | - | - | - |
| MAP3K6    | 2 | 0 | - | - | -   | - | - | - | - |
| MAPKBP1   | 2 | 2 | - | - | -   | - | - | - | - |
| MATN2     | 2 | 1 | - | - | -   | - | - | - | - |
| MBD1      | 2 | 0 | - | - | -   | - | - | - | - |
| MCCC1     | 2 | 1 | - | - | -   | - | - | - | - |
| MCAM8     | 2 | 0 | - | - | -   | - | - | - | - |
| MELK      | 2 | 1 | - | - | -   | - | - | - | - |
| MESP1     | 2 | 0 | - | - | -   | - | - | - | - |
| METTL4    | 2 | 0 | - | - | -   | - | - | - | - |
| MFRP      | 2 | 0 | - | - | -   | - | - | - | - |
| MFSD12    | 2 | 1 | - | - | -   | - | - | - | - |
| MFSD7     | 2 | 1 | - | - | -   | - | - | - | - |
| MFSD9     | 2 | 0 | - | - | -   | - | - | - | - |
| MGAT2     | 2 | 0 | - | - | -   | - | - | - | - |
| MICAL1    | 2 | 0 | - | - | -   | - | - | - | - |
| MICALCL   | 2 | 2 | - | - | -   | - | - | - | - |
| MIF4GD    | 2 | 1 | - | - | -   | - | - | - | - |
| MIS18BP1  | 2 | 1 | - | - | -   | - | - | - | - |
| MMEL1     | 2 | 2 | 2 | - | -   | - | - | - | - |
| MMP1      | 2 | 2 | - | - | -   | - | - | - | - |
| MMP25     | 2 | 2 | - | - | -   | - | - | - | - |
| MMRN1     | 2 | 1 | - | - | -   | - | - | - | - |
| MNDA      | 2 | 3 | - | - | -   | - | - | - | - |
| MNT       | 2 | 0 | - | - | -   | - | - | - | - |
| MPDZ      | 2 | 2 | - | - | -   | - | - | - | - |
| MPP4      | 2 | 0 | - | - | -   | - | - | - | - |
| MPZL2     | 2 | 1 | - | - | -   | - | - | - | - |
| MROH8     | 2 | 2 | - | - | -   | - | - | - | - |
| MSH3      | 2 | 1 | - | - | Yes | - | - | - | - |
| MSLN      | 2 | 0 | - | - | -   | - | - | - | - |
| MST1R     | 2 | 2 | - | - | -   | - | - | - | - |
| MTBP      | 2 | 1 | - | - | -   | - | - | - | - |

|          |   |   |   |     |   |   |   |   |     |   |
|----------|---|---|---|-----|---|---|---|---|-----|---|
| MTMR8    | 2 | 0 | - | -   | - | - | - | - | -   | - |
| MUC17    | 2 | 5 | - | -   | - | - | - | - | -   | - |
| MUC6     | 2 | 2 | - | -   | - | - | - | - | -   | - |
| MYBPC3   | 2 | 1 | - | -   | - | - | - | - | -   | - |
| MYF6     | 2 | 0 | - | -   | - | - | - | - | -   | - |
| MYH8     | 2 | 2 | 1 | -   | - | - | - | - | -   | - |
| MYLK     | 2 | 1 | - | -   | - | - | - | - | -   | - |
| MYO18B   | 2 | 1 | - | -   | - | - | - | - | -   | - |
| MYO1A    | 2 | 1 | - | -   | - | - | - | - | -   | - |
| MYO3A    | 2 | 2 | 1 | -   | - | - | - | - | -   | - |
| MYRIP    | 2 | 2 | 1 | -   | - | - | - | - | -   | - |
| NAA60    | 2 | 0 | - | -   | - | - | - | - | -   | - |
| NANOS1   | 2 | 0 | - | -   | - | - | - | - | -   | - |
| NBAS     | 2 | 5 | - | -   | - | - | - | - | -   | - |
| NBEAL2   | 2 | 0 | 1 | -   | - | - | - | - | -   | - |
| NBPF7    | 2 | 1 | - | -   | - | - | - | - | -   | - |
| NCOR2    | 2 | 4 | - | -   | - | - | - | - | -   | - |
| NDOR1    | 2 | 1 | - | -   | - | - | - | - | -   | - |
| NDUFAF6  | 2 | 0 | - | -   | - | - | - | - | -   | - |
| NEBL     | 2 | 0 | - | -   | - | - | - | - | -   | - |
| NEDD4    | 2 | 2 | - | -   | - | - | - | - | -   | - |
| NEFH     | 2 | 1 | - | -   | - | - | - | - | -   | - |
| NEGF     | 2 | 0 | - | -   | - | - | - | - | -   | - |
| NHSL1    | 2 | 1 | - | -   | - | - | - | - | -   | - |
| NKX1-2   | 2 | 0 | - | -   | - | - | - | - | -   | - |
| NLRP12   | 2 | 0 | 1 | -   | - | - | - | - | -   | - |
| NLRP13   | 2 | 0 | - | -   | - | - | - | - | -   | - |
| NLRP4    | 2 | 1 | 1 | -   | - | - | - | - | -   | - |
| NME1     | 2 | 2 | - | Yes | - | - | - | - | -   | - |
| NME4     | 2 | 0 | - | -   | - | - | - | - | -   | - |
| NNMT     | 2 | 1 | - | -   | - | - | - | - | -   | - |
| NOC2L    | 2 | 1 | - | -   | - | - | - | - | -   | - |
| NOC3L    | 2 | 2 | - | -   | - | - | - | - | -   | - |
| NOD2     | 2 | 0 | - | -   | - | - | - | - | -   | - |
| NOL3     | 2 | 1 | - | -   | - | - | - | - | -   | - |
| NPC1     | 2 | 0 | - | -   | - | - | - | - | -   | - |
| NR1I2    | 2 | 2 | 1 | -   | - | - | - | - | -   | - |
| NR1I3    | 2 | 0 | - | -   | - | - | - | - | -   | - |
| NRG1     | 2 | 0 | - | -   | - | - | - | - | -   | - |
| NRIP1    | 2 | 0 | - | -   | - | - | - | - | -   | - |
| NTSE     | 2 | 0 | 1 | -   | - | - | - | - | -   | - |
| NTN5     | 2 | 2 | - | -   | - | - | - | - | -   | - |
| NUDT6    | 2 | 0 | - | -   | - | - | - | - | -   | - |
| NUDT7    | 2 | 0 | - | -   | - | - | - | - | -   | - |
| NUP210   | 2 | 2 | - | -   | - | - | - | - | -   | - |
| OBSL1    | 2 | 2 | 1 | -   | - | - | - | - | -   | - |
| OCEL1    | 2 | 0 | - | -   | - | - | - | - | -   | - |
| ODAM     | 2 | 2 | - | -   | - | - | - | - | -   | - |
| OLFML2B  | 2 | 1 | - | -   | - | - | - | - | -   | - |
| OPLAH    | 2 | 1 | - | -   | - | - | - | - | -   | - |
| OR10A3   | 2 | 1 | - | -   | - | - | - | - | -   | - |
| OR10W1   | 2 | 0 | - | -   | - | - | - | - | -   | - |
| OR13H1   | 2 | 0 | - | -   | - | - | - | - | -   | - |
| OR1E1    | 2 | 1 | - | -   | - | - | - | - | -   | - |
| OR1J2    | 2 | 0 | - | -   | - | - | - | - | -   | - |
| OR2B2    | 2 | 1 | - | -   | - | - | - | - | -   | - |
| OR2T11   | 2 | 0 | - | -   | - | - | - | - | -   | - |
| OR2T27   | 2 | 1 | - | -   | - | - | - | - | -   | - |
| OR2T3    | 2 | 0 | - | -   | - | - | - | - | -   | - |
| OR4A16   | 2 | 1 | - | -   | - | - | - | - | -   | - |
| OR52B6   | 2 | 0 | - | -   | - | - | - | - | -   | - |
| OR52M1   | 2 | 0 | - | -   | - | - | - | - | -   | - |
| OR9A4    | 2 | 1 | - | -   | - | - | - | - | -   | - |
| OR9K2    | 2 | 0 | - | -   | - | - | - | - | -   | - |
| OSCAR    | 2 | 1 | - | -   | - | - | - | - | -   | - |
| OSMR     | 2 | 3 | - | -   | - | - | - | - | -   | - |
| OTOGL    | 2 | 5 | - | -   | - | - | - | - | -   | - |
| PADI1    | 2 | 2 | - | -   | - | - | - | - | -   | - |
| PADI3    | 2 | 0 | - | -   | - | - | - | - | -   | - |
| PAEP     | 2 | 0 | - | -   | - | - | - | - | -   | - |
| PARP3    | 2 | 0 | - | Yes | - | - | - | - | -   | - |
| PCDHA12  | 2 | 1 | - | -   | - | - | - | - | -   | - |
| PCDHB1   | 2 | 0 | - | -   | - | - | - | - | -   | - |
| PCDHGA5  | 2 | 1 | 1 | -   | - | - | - | - | -   | - |
| PCDHGB7  | 2 | 0 | - | -   | - | - | - | - | -   | - |
| PCLO     | 2 | 0 | 2 | -   | - | - | - | - | -   | - |
| PCNT     | 2 | 0 | 1 | -   | - | - | - | - | -   | - |
| PCSK5    | 2 | 1 | - | -   | - | - | - | - | -   | - |
| PDCD11   | 2 | 0 | - | -   | - | - | - | - | -   | - |
| PDE3B    | 2 | 1 | - | -   | - | - | - | - | -   | - |
| PDZD3    | 2 | 1 | - | -   | - | - | - | - | -   | - |
| PEX12    | 2 | 2 | - | -   | - | - | - | - | -   | - |
| PEX6     | 2 | 2 | - | -   | - | - | - | - | -   | - |
| PHTF1    | 2 | 2 | - | -   | - | - | - | - | -   | - |
| PIDD1    | 2 | 0 | 1 | -   | - | - | - | - | -   | - |
| PIEZO1   | 2 | 4 | - | -   | - | - | - | - | -   | - |
| PIF1     | 2 | 1 | - | -   | - | - | - | - | -   | - |
| PIK3C2G  | 2 | 2 | 1 | -   | - | - | - | - | -   | - |
| PIK3R6   | 2 | 1 | 1 | -   | - | - | - | - | -   | - |
| PILRB    | 2 | 0 | - | -   | - | - | - | - | -   | - |
| PINX1    | 2 | 0 | - | -   | - | - | - | - | -   | - |
| PKD1L1   | 2 | 3 | - | -   | - | - | - | - | -   | - |
| PKD1L3   | 2 | 6 | - | -   | - | - | - | - | -   | - |
| PLA2G4E  | 2 | 0 | - | -   | - | - | - | - | -   | - |
| PLAC4    | 2 | 1 | - | -   | - | - | - | - | -   | - |
| PLCD1    | 2 | 0 | - | -   | - | - | - | - | -   | - |
| PLD1     | 2 | 2 | - | -   | - | - | - | - | -   | - |
| PLEKHD1  | 2 | 0 | - | -   | - | - | - | - | -   | - |
| PLEKHG1  | 2 | 1 | - | -   | - | - | - | - | -   | - |
| PLIN4    | 2 | 1 | - | -   | - | - | - | - | -   | - |
| PLK5     | 2 | 0 | - | -   | - | - | - | - | -   | - |
| PMS1     | 2 | 1 | - | Yes | - | - | - | - | Yes | - |
| PNKD     | 2 | 0 | - | -   | - | - | - | - | -   | - |
| PNLIPRP1 | 2 | 1 | - | -   | - | - | - | - | -   | - |
| PNLIPRP3 | 2 | 1 | - | -   | - | - | - | - | -   | - |
| PNPLA8   | 2 | 0 | 1 | -   | - | - | - | - | -   | - |



|          |   |   |   |     |   |   |   |   |   |
|----------|---|---|---|-----|---|---|---|---|---|
| POLG     | 2 | 0 | - | Yes | - | - | - | - | - |
| POLK     | 2 | 0 | - | Yes | - | - | - | - | - |
| POLL     | 2 | 0 | - | Yes | - | - | - | - | - |
| POLR3B   | 2 | 1 | - | -   | - | - | - | - | - |
| POLRMT   | 2 | 2 | - | -   | - | - | - | - | - |
| POTE4    | 2 | 1 | - | -   | - | - | - | - | - |
| POU2F3   | 2 | 1 | - | -   | - | - | - | - | - |
| POU6F2   | 2 | 0 | - | -   | - | - | - | - | - |
| PPFIBP1  | 2 | 0 | - | -   | - | - | - | - | - |
| PPFIBP2  | 2 | 3 | - | -   | - | - | - | - | - |
| PPM1D    | 2 | 1 | - | Yes | - | - | - | - | - |
| PPP1R12B | 2 | 3 | - | -   | - | - | - | - | - |
| PPP1R15A | 2 | 0 | - | -   | - | - | - | - | - |
| PPP3CC   | 2 | 0 | - | -   | - | - | - | - | - |
| PRDM7    | 2 | 0 | 1 | -   | - | - | - | - | - |
| PRELID2  | 2 | 0 | - | -   | - | - | - | - | - |
| PREPL    | 2 | 0 | - | -   | - | - | - | - | - |
| PRIM2    | 2 | 1 | - | -   | - | - | - | - | - |
| PROCA1   | 2 | 0 | - | -   | - | - | - | - | - |
| PRPH     | 2 | 0 | 1 | -   | - | - | - | - | - |
| PRRT3    | 2 | 0 | - | -   | - | - | - | - | - |
| PRSS12   | 2 | 3 | - | -   | - | - | - | - | - |
| PRSS33   | 2 | 0 | - | -   | - | - | - | - | - |
| PRSS41   | 2 | 0 | - | -   | - | - | - | - | - |
| PRSS42   | 2 | 1 | - | -   | - | - | - | - | - |
| PTGER1   | 2 | 0 | - | -   | - | - | - | - | - |
| PTPRD    | 2 | 1 | - | -   | - | - | - | - | - |
| PUS7L    | 2 | 1 | 1 | -   | - | - | - | - | - |
| PWP1     | 2 | 1 | - | -   | - | - | - | - | - |
| PXMP2    | 2 | 0 | - | -   | - | - | - | - | - |
| PZP      | 2 | 1 | - | -   | - | - | - | - | - |
| RAB25    | 2 | 2 | - | -   | - | - | - | - | - |
| RAB41    | 2 | 1 | - | -   | - | - | - | - | - |
| RBBP6    | 2 | 0 | - | -   | - | - | - | - | - |
| RBM5     | 2 | 1 | - | -   | - | - | - | - | - |
| RBPJL    | 2 | 2 | - | -   | - | - | - | - | - |
| RETSAT   | 2 | 2 | - | -   | - | - | - | - | - |
| RFC1     | 2 | 0 | 1 | Yes | - | - | - | - | - |
| RFC4     | 2 | 0 | - | Yes | - | - | - | - | - |
| RGS12    | 2 | 0 | - | -   | - | - | - | - | - |
| RGS3     | 2 | 2 | 1 | -   | - | - | - | - | - |
| RHBDD3   | 2 | 2 | - | -   | - | - | - | - | - |
| RHNO1    | 2 | 1 | - | -   | - | - | - | - | - |
| RIMS1    | 2 | 2 | 2 | -   | - | - | - | - | - |
| RNASEL   | 2 | 2 | - | -   | - | - | - | - | - |
| RNF215   | 2 | 0 | - | -   | - | - | - | - | - |
| RNFT1    | 2 | 0 | - | -   | - | - | - | - | - |
| RNPBP    | 2 | 3 | - | -   | - | - | - | - | - |
| ROCK1    | 2 | 0 | - | -   | - | - | - | - | - |
| RPGRIPI  | 2 | 1 | 1 | -   | - | - | - | - | - |
| RUFY4    | 2 | 1 | - | -   | - | - | - | - | - |
| SAA1     | 2 | 0 | - | -   | - | - | - | - | - |
| SAMHD1   | 2 | 0 | - | -   | - | - | - | - | - |
| SCLT1    | 2 | 0 | - | -   | - | - | - | - | - |
| SCN11A   | 2 | 1 | 1 | -   | - | - | - | - | - |
| SCYL3    | 2 | 0 | 1 | -   | - | - | - | - | - |
| SDCCAG8  | 2 | 1 | - | -   | - | - | - | - | - |
| SDPR     | 2 | 1 | - | -   | - | - | - | - | - |
| SEC63    | 2 | 1 | - | -   | - | - | - | - | - |
| SEMA3G   | 2 | 4 | - | -   | - | - | - | - | - |
| SEMG2    | 2 | 1 | - | -   | - | - | - | - | - |
| SERGEF   | 2 | 0 | - | -   | - | - | - | - | - |
| SFPQ     | 2 | 1 | - | Yes | - | - | - | - | - |
| SFT2D3   | 2 | 0 | - | -   | - | - | - | - | - |
| SGK494   | 2 | 0 | - | -   | - | - | - | - | - |
| SH2D4A   | 2 | 1 | - | -   | - | - | - | - | - |
| SH2D4B   | 2 | 0 | - | -   | - | - | - | - | - |
| SH2D7    | 2 | 2 | - | -   | - | - | - | - | - |
| SHANK3   | 2 | 1 | - | -   | - | - | - | - | - |
| SHISA6   | 2 | 1 | - | -   | - | - | - | - | - |
| SIGLEC5  | 2 | 2 | 1 | -   | - | - | - | - | - |
| SIGLECL1 | 2 | 0 | - | -   | - | - | - | - | - |
| SIRT3    | 2 | 1 | - | -   | - | - | - | - | - |
| SLC12A7  | 2 | 0 | - | -   | - | - | - | - | - |
| SLC16A11 | 2 | 0 | - | -   | - | - | - | - | - |
| SLC16A3  | 2 | 1 | - | -   | - | - | - | - | - |
| SLC22A10 | 2 | 1 | - | -   | - | - | - | - | - |
| SLC22A16 | 2 | 2 | - | -   | - | - | - | - | - |
| SLC22A2  | 2 | 0 | - | -   | - | - | - | - | - |
| SLC27A1  | 2 | 0 | - | -   | - | - | - | - | - |
| SLC27A3  | 2 | 0 | 1 | -   | - | - | - | - | - |
| SLC35B2  | 2 | 0 | - | -   | - | - | - | - | - |
| SLC38A6  | 2 | 1 | - | -   | - | - | - | - | - |
| SLC39A11 | 2 | 2 | - | -   | - | - | - | - | - |
| SLC45A2  | 2 | 1 | - | -   | - | - | - | - | - |
| SLC4A5   | 2 | 0 | - | -   | - | - | - | - | - |
| SLC5A2   | 2 | 1 | - | -   | - | - | - | - | - |
| SLC6A20  | 2 | 0 | - | -   | - | - | - | - | - |
| SLC7A2   | 2 | 1 | - | -   | - | - | - | - | - |
| SLC7A9   | 2 | 0 | 1 | -   | - | - | - | - | - |
| SLFN12   | 2 | 2 | - | -   | - | - | - | - | - |
| SMC4     | 2 | 3 | - | -   | - | - | - | - | - |
| SMYD4    | 2 | 0 | - | -   | - | - | - | - | - |
| SNAPC4   | 2 | 2 | - | -   | - | - | - | - | - |
| SNTG2    | 2 | 0 | - | -   | - | - | - | - | - |
| SNUPN    | 2 | 0 | - | -   | - | - | - | - | - |
| SNX9     | 2 | 0 | - | -   | - | - | - | - | - |
| SOX12    | 2 | 0 | - | -   | - | - | - | - | - |
| SP110    | 2 | 2 | - | -   | - | - | - | - | - |
| SPATASL1 | 2 | 1 | - | -   | - | - | - | - | - |
| SPG11    | 2 | 1 | 1 | -   | - | - | - | - | - |
| SQRDL    | 2 | 1 | - | -   | - | - | - | - | - |
| SSC5D    | 2 | 1 | - | -   | - | - | - | - | - |
| STAB1    | 2 | 3 | - | -   | - | - | - | - | - |
| STEAP2   | 2 | 0 | - | -   | - | - | - | - | - |
| STEAP3   | 2 | 0 | - | -   | - | - | - | - | - |

|               |   |   |    |     |     |     |     |     |   |
|---------------|---|---|----|-----|-----|-----|-----|-----|---|
| STK3          | 2 | 0 | -  | -   | -   | -   | -   | -   | - |
| STK31         | 2 | 1 | -  | -   | -   | -   | -   | -   | - |
| STON1-GTF2AIL | 2 | 3 | -  | -   | -   | -   | -   | -   | - |
| STX8          | 2 | 2 | -  | -   | -   | -   | -   | -   | - |
| STYX          | 2 | 0 | -  | -   | -   | -   | -   | -   | - |
| SYCE1         | 2 | 1 | -  | -   | -   | -   | -   | -   | - |
| SYNM          | 2 | 4 | 1  | -   | -   | -   | -   | -   | - |
| SYTL2         | 2 | 2 | -  | -   | -   | -   | -   | -   | - |
| TAF1C         | 2 | 1 | -  | -   | -   | -   | -   | -   | - |
| TANC1         | 2 | 1 | -  | -   | -   | -   | -   | -   | - |
| TARBP1        | 2 | 1 | -  | -   | -   | -   | -   | -   | - |
| TARM1         | 2 | 2 | -  | -   | -   | -   | -   | -   | - |
| TASIR3        | 2 | 0 | -  | -   | -   | -   | -   | -   | - |
| TAS2R14       | 2 | 1 | -  | -   | -   | -   | -   | -   | - |
| TATDN3        | 2 | 0 | -  | -   | -   | -   | -   | -   | - |
| TBC1D1        | 2 | 0 | -  | -   | -   | -   | -   | -   | - |
| TBX6          | 2 | 0 | -  | -   | -   | -   | -   | -   | - |
| TCIRG1        | 2 | 0 | -  | -   | -   | -   | -   | -   | - |
| TCN2          | 2 | 1 | -  | -   | -   | -   | -   | -   | - |
| TCTN2         | 2 | 0 | -  | -   | -   | -   | -   | -   | - |
| TDRD10        | 2 | 2 | -  | -   | -   | -   | -   | -   | - |
| TGM6          | 2 | 4 | -  | -   | -   | -   | -   | -   | - |
| THEG          | 2 | 0 | -  | -   | -   | -   | -   | -   | - |
| TLE6          | 2 | 1 | -  | -   | -   | -   | -   | -   | - |
| TLR1          | 2 | 4 | -  | -   | -   | -   | -   | -   | - |
| TLR10         | 2 | 1 | -  | -   | -   | -   | -   | -   | - |
| TLR2          | 2 | 2 | -  | -   | -   | -   | -   | -   | - |
| TMC2          | 2 | 2 | -  | -   | -   | -   | -   | -   | - |
| TMC3          | 2 | 1 | -  | -   | -   | -   | -   | -   | - |
| TMC4          | 2 | 0 | -  | -   | -   | -   | -   | -   | - |
| TMEM143       | 2 | 1 | -  | -   | -   | -   | -   | -   | - |
| TMEM232       | 2 | 0 | -  | -   | -   | -   | -   | -   | - |
| TMEM255B      | 2 | 0 | -  | -   | -   | -   | -   | -   | - |
| TMEM308       | 2 | 0 | -  | -   | -   | -   | -   | -   | - |
| TMEM44        | 2 | 0 | 1  | -   | -   | -   | -   | -   | - |
| TMPRSS15      | 2 | 0 | -  | -   | -   | -   | -   | -   | - |
| TMPRSS5       | 2 | 2 | -  | -   | -   | -   | -   | -   | - |
| TP53          | 2 | 0 | 28 | Yes | Yes | Yes | Yes | Yes | - |
| TP53I13       | 2 | 0 | -  | -   | -   | -   | -   | -   | - |
| TPRG1L        | 2 | 2 | -  | -   | -   | -   | -   | -   | - |
| TPSG1         | 2 | 1 | -  | -   | -   | -   | -   | -   | - |
| TRIM16        | 2 | 0 | -  | -   | -   | -   | -   | -   | - |
| TRIM38        | 2 | 2 | -  | -   | -   | -   | -   | -   | - |
| TRIM4         | 2 | 1 | -  | -   | -   | -   | -   | -   | - |
| TRIM42        | 2 | 0 | -  | -   | -   | -   | -   | -   | - |
| TRIM60        | 2 | 3 | -  | -   | -   | -   | -   | -   | - |
| TRIOBP        | 2 | 3 | -  | -   | -   | -   | -   | -   | - |
| TRMT44        | 2 | 1 | -  | -   | -   | -   | -   | -   | - |
| TRPM1         | 2 | 2 | -  | -   | -   | -   | -   | -   | - |
| TRPV3         | 2 | 2 | -  | -   | -   | -   | -   | -   | - |
| TSR3          | 2 | 0 | -  | -   | -   | -   | -   | -   | - |
| TSSC4         | 2 | 1 | -  | -   | -   | -   | -   | -   | - |
| TTC27         | 2 | 0 | -  | -   | -   | -   | -   | -   | - |
| TTC29         | 2 | 2 | -  | -   | -   | -   | -   | -   | - |
| TTC34         | 2 | 0 | -  | -   | -   | -   | -   | -   | - |
| TTC39B        | 2 | 1 | -  | -   | -   | -   | -   | -   | - |
| CFAP46        | 2 | 1 | -  | -   | -   | -   | -   | -   | - |
| TLL2          | 2 | 0 | -  | -   | -   | -   | -   | -   | - |
| TLL3          | 2 | 2 | -  | -   | -   | -   | -   | -   | - |
| TUFM          | 2 | 1 | -  | -   | -   | -   | -   | -   | - |
| TXNRD3NB      | 2 | 1 | -  | -   | -   | -   | -   | -   | - |
| TYR           | 2 | 1 | -  | -   | -   | -   | -   | -   | - |
| UCP2          | 2 | 1 | -  | Yes | -   | -   | -   | -   | - |
| UFSP1         | 2 | 0 | -  | -   | -   | -   | -   | -   | - |
| UGGT2         | 2 | 1 | -  | -   | -   | -   | -   | -   | - |
| UGT3A1        | 2 | 0 | -  | -   | -   | -   | -   | -   | - |
| URB2          | 2 | 2 | -  | -   | -   | -   | -   | -   | - |
| USP10         | 2 | 0 | -  | -   | -   | -   | -   | -   | - |
| USP37         | 2 | 0 | -  | -   | -   | -   | -   | -   | - |
| USP53         | 2 | 0 | -  | -   | -   | -   | -   | -   | - |
| VIPAS39       | 2 | 1 | 1  | -   | -   | -   | -   | -   | - |
| VPS13C        | 2 | 7 | -  | -   | -   | -   | -   | -   | - |
| VPS33B        | 2 | 0 | -  | -   | -   | -   | -   | -   | - |
| VRK2          | 2 | 0 | 1  | -   | -   | -   | -   | -   | - |
| VWA1          | 2 | 1 | -  | -   | -   | -   | -   | -   | - |
| VWA5A         | 2 | 1 | -  | -   | -   | -   | -   | -   | - |
| VWA5B1        | 2 | 1 | -  | -   | -   | -   | -   | -   | - |
| VWDE          | 2 | 0 | -  | -   | -   | -   | -   | -   | - |
| WDR25         | 2 | 0 | -  | -   | -   | -   | -   | -   | - |
| WDR34         | 2 | 0 | -  | -   | -   | -   | -   | -   | - |
| WDR64         | 2 | 2 | -  | -   | -   | -   | -   | -   | - |
| CFAP57        | 2 | 2 | -  | -   | -   | -   | -   | -   | - |
| WDR66         | 2 | 3 | 1  | -   | -   | -   | -   | -   | - |
| TBC1D31       | 2 | 1 | -  | -   | -   | -   | -   | -   | - |
| WDR73         | 2 | 0 | -  | -   | -   | -   | -   | -   | - |
| WDR75         | 2 | 0 | -  | -   | -   | -   | -   | -   | - |
| WDR90         | 2 | 2 | -  | -   | -   | -   | -   | -   | - |
| WNK4          | 2 | 4 | 1  | -   | -   | -   | -   | -   | - |
| XRCC1         | 2 | 0 | -  | Yes | -   | -   | -   | -   | - |
| ZAN           | 2 | 2 | -  | -   | -   | -   | -   | -   | - |
| ZBTB40        | 2 | 1 | -  | -   | -   | -   | -   | -   | - |
| ZDHHC1        | 2 | 0 | -  | -   | -   | -   | -   | -   | - |
| ZFAND1        | 2 | 0 | -  | -   | -   | -   | -   | -   | - |
| ZFP1          | 2 | 0 | -  | -   | -   | -   | -   | -   | - |
| RBSN          | 2 | 0 | -  | -   | -   | -   | -   | -   | - |
| ZMPSTE24      | 2 | 1 | -  | -   | -   | -   | -   | -   | - |
| ZMYM5         | 2 | 0 | -  | -   | -   | -   | -   | -   | - |
| ZNF135        | 2 | 1 | -  | -   | -   | -   | -   | -   | - |
| ZNF18         | 2 | 0 | -  | -   | -   | -   | -   | -   | - |
| ZNF180        | 2 | 0 | -  | -   | -   | -   | -   | -   | - |
| ZNF197        | 2 | 1 | -  | -   | -   | -   | -   | -   | - |
| ZNF276        | 2 | 0 | -  | -   | -   | -   | -   | -   | - |
| ZNF318        | 2 | 2 | -  | -   | -   | -   | -   | -   | - |
| ZNF391        | 2 | 2 | -  | -   | -   | -   | -   | -   | - |
| ZNF407        | 2 | 0 | -  | -   | -   | -   | -   | -   | - |
| ZNF419        | 2 | 1 | -  | -   | -   | -   | -   | -   | - |

|          |   |   |   |   |     |   |   |   |   |
|----------|---|---|---|---|-----|---|---|---|---|
| ZNF433   | 2 | 2 | - | - | -   | - | - | - | - |
| ZNF438   | 2 | 0 | - | - | -   | - | - | - | - |
| ZNF468   | 2 | 1 | - | - | -   | - | - | - | - |
| ZNF471   | 2 | 0 | - | - | -   | - | - | - | - |
| ZNF488   | 2 | 1 | - | - | -   | - | - | - | - |
| ZNF510   | 2 | 1 | - | - | -   | - | - | - | - |
| ZNF540   | 2 | 2 | - | - | -   | - | - | - | - |
| ZNF547   | 2 | 0 | - | - | -   | - | - | - | - |
| ZNF587   | 2 | 1 | - | - | -   | - | - | - | - |
| ZNF669   | 2 | 1 | - | - | -   | - | - | - | - |
| ZNF71    | 2 | 1 | - | - | -   | - | - | - | - |
| ZNF764   | 2 | 1 | - | - | -   | - | - | - | - |
| ZNF774   | 2 | 1 | - | - | -   | - | - | - | - |
| ZNF776   | 2 | 1 | - | - | -   | - | - | - | - |
| ZNF782   | 2 | 0 | - | - | -   | - | - | - | - |
| ZNF878   | 2 | 2 | - | - | -   | - | - | - | - |
| ZP1      | 2 | 0 | - | - | -   | - | - | - | - |
| ZP3      | 2 | 0 | - | - | -   | - | - | - | - |
| ZSCAN2   | 2 | 0 | - | - | -   | - | - | - | - |
| ZSCAN9   | 2 | 0 | - | - | -   | - | - | - | - |
| ZSWIM1   | 2 | 0 | - | - | -   | - | - | - | - |
| ZSWIM7   | 2 | 0 | - | - | Yes | - | - | - | - |
| SEPT4    | 1 | 1 | - | - | -   | - | - | - | - |
| SEPT10   | 1 | 0 | - | - | -   | - | - | - | - |
| SEPT12   | 1 | 1 | - | - | -   | - | - | - | - |
| A1BG     | 1 | 1 | - | - | -   | - | - | - | - |
| A2M      | 1 | 0 | - | - | -   | - | - | - | - |
| AACS     | 1 | 4 | - | - | -   | - | - | - | - |
| AARSD1   | 1 | 0 | - | - | -   | - | - | - | - |
| AATF     | 1 | 4 | - | - | Yes | - | - | - | - |
| ABCA1    | 1 | 2 | 1 | - | -   | - | - | - | - |
| ABCA6    | 1 | 1 | 1 | - | -   | - | - | - | - |
| ABCC1    | 1 | 0 | - | - | -   | - | - | - | - |
| ABCC12   | 1 | 1 | - | - | -   | - | - | - | - |
| ABCC8    | 1 | 0 | - | - | -   | - | - | - | - |
| ABCF3    | 1 | 0 | - | - | -   | - | - | - | - |
| ABCG1    | 1 | 0 | - | - | -   | - | - | - | - |
| ABCG4    | 1 | 0 | 1 | - | -   | - | - | - | - |
| ABCG8    | 1 | 3 | - | - | -   | - | - | - | - |
| ABHD10   | 1 | 0 | - | - | -   | - | - | - | - |
| ABHD12   | 1 | 1 | - | - | -   | - | - | - | - |
| ABI3BP   | 1 | 1 | 1 | - | -   | - | - | - | - |
| ABLIM2   | 1 | 1 | - | - | -   | - | - | - | - |
| ABO      | 1 | 1 | - | - | -   | - | - | - | - |
| ACACA    | 1 | 0 | 1 | - | -   | - | - | - | - |
| ACAD9    | 1 | 0 | - | - | -   | - | - | - | - |
| ACADL    | 1 | 3 | - | - | -   | - | - | - | - |
| ACADM    | 1 | 0 | - | - | -   | - | - | - | - |
| ACADSB   | 1 | 1 | - | - | -   | - | - | - | - |
| ACBD5    | 1 | 0 | - | - | -   | - | - | - | - |
| ACD      | 1 | 0 | - | - | -   | - | - | - | - |
| ACER1    | 1 | 1 | - | - | -   | - | - | - | - |
| ACO1     | 1 | 2 | - | - | -   | - | - | - | - |
| ACOT1    | 1 | 0 | - | - | -   | - | - | - | - |
| ACOT12   | 1 | 0 | - | - | -   | - | - | - | - |
| ACOT13   | 1 | 1 | - | - | -   | - | - | - | - |
| ACOT9    | 1 | 0 | - | - | -   | - | - | - | - |
| ACOX2    | 1 | 1 | - | - | -   | - | - | - | - |
| ACRBP    | 1 | 1 | - | - | -   | - | - | - | - |
| ACSBG2   | 1 | 1 | - | - | -   | - | - | - | - |
| ACSL3    | 1 | 1 | - | - | -   | - | - | - | - |
| ACSL6    | 1 | 1 | - | - | -   | - | - | - | - |
| ACSM4    | 1 | 3 | - | - | -   | - | - | - | - |
| ACSS3    | 1 | 1 | - | - | -   | - | - | - | - |
| ACTB     | 1 | 0 | - | - | -   | - | - | - | - |
| ACTG1    | 1 | 0 | - | - | -   | - | - | - | - |
| ACTL6B   | 1 | 0 | - | - | -   | - | - | - | - |
| ACTL8    | 1 | 0 | - | - | -   | - | - | - | - |
| ACY1     | 1 | 1 | - | - | -   | - | - | - | - |
| ADAL     | 1 | 0 | - | - | -   | - | - | - | - |
| ADAM18   | 1 | 2 | - | - | -   | - | - | - | - |
| ADAM28   | 1 | 2 | - | - | -   | - | - | - | - |
| ADAM32   | 1 | 0 | - | - | -   | - | - | - | - |
| ADAM7    | 1 | 2 | - | - | -   | - | - | - | - |
| ADAMDECI | 1 | 3 | - | - | -   | - | - | - | - |
| ADAMTS13 | 1 | 1 | - | - | -   | - | - | - | - |
| ADAMTS14 | 1 | 1 | - | - | -   | - | - | - | - |
| ADAMTS17 | 1 | 0 | - | - | -   | - | - | - | - |
| ADAMTS19 | 1 | 1 | - | - | -   | - | - | - | - |
| ADAMTS20 | 1 | 3 | - | - | -   | - | - | - | - |
| ADAMTS5  | 1 | 1 | - | - | -   | - | - | - | - |
| ADAMTSL1 | 1 | 0 | - | - | -   | - | - | - | - |
| ADAMTSL5 | 1 | 0 | - | - | -   | - | - | - | - |
| ADAT1    | 1 | 0 | - | - | -   | - | - | - | - |
| ADCY4    | 1 | 0 | - | - | -   | - | - | - | - |
| ADCY9    | 1 | 0 | - | - | -   | - | - | - | - |
| ADD2     | 1 | 0 | 1 | - | -   | - | - | - | - |
| ADD3     | 1 | 0 | - | - | -   | - | - | - | - |
| ADH6     | 1 | 2 | - | - | -   | - | - | - | - |
| ADHFE1   | 1 | 1 | - | - | -   | - | - | - | - |
| ADH1     | 1 | 1 | - | - | -   | - | - | - | - |
| ADIRF    | 1 | 0 | - | - | -   | - | - | - | - |
| ADNP     | 1 | 1 | - | - | -   | - | - | - | - |
| ADORA2B  | 1 | 1 | - | - | -   | - | - | - | - |
| ADPRH    | 1 | 1 | - | - | -   | - | - | - | - |
| ADRA2B   | 1 | 0 | 1 | - | -   | - | - | - | - |
| ADSL     | 1 | 1 | - | - | -   | - | - | - | - |
| ADSS     | 1 | 1 | - | - | -   | - | - | - | - |
| ADSSL1   | 1 | 0 | - | - | -   | - | - | - | - |
| ADTRP    | 1 | 0 | - | - | -   | - | - | - | - |
| AEN      | 1 | 0 | - | - | -   | - | - | - | - |
| AFM      | 1 | 1 | - | - | -   | - | - | - | - |
| AFTPH    | 1 | 1 | - | - | -   | - | - | - | - |
| AGBL2    | 1 | 2 | - | - | -   | - | - | - | - |
| AGGF1    | 1 | 0 | - | - | -   | - | - | - | - |
| AGL      | 1 | 0 | - | - | -   | - | - | - | - |

|          |   |   |   |     |     |   |   |     |
|----------|---|---|---|-----|-----|---|---|-----|
| AGMAT    | 1 | 1 | - | -   | -   | - | - | -   |
| AGPAT2   | 1 | 0 | - | -   | -   | - | - | -   |
| AGPAT9   | 1 | 0 | - | -   | -   | - | - | -   |
| HYKK     | 1 | 1 | - | -   | -   | - | - | -   |
| AGTR2    | 1 | 0 | - | -   | -   | - | - | -   |
| ETNPPL   | 1 | 0 | - | -   | -   | - | - | -   |
| PHYKPL   | 1 | 1 | - | -   | -   | - | - | -   |
| AHCYL1   | 1 | 0 | - | -   | -   | - | - | -   |
| AHH1     | 1 | 4 | - | -   | -   | - | - | -   |
| AHNAK2   | 1 | 4 | - | -   | -   | - | - | -   |
| AHR      | 1 | 0 | - | Yes | -   | - | - | -   |
| AIG1     | 1 | 0 | - | -   | -   | - | - | -   |
| AIM1     | 1 | 4 | - | -   | -   | - | - | -   |
| AIM2     | 1 | 1 | - | -   | -   | - | - | -   |
| AIMP1    | 1 | 1 | - | -   | -   | - | - | -   |
| AK5      | 1 | 0 | - | -   | -   | - | - | -   |
| AKAP3    | 1 | 0 | - | -   | -   | - | - | -   |
| AKAP9    | 1 | 1 | - | -   | -   | - | - | -   |
| AKIP1    | 1 | 0 | - | -   | -   | - | - | -   |
| ALDH1L2  | 1 | 4 | - | -   | -   | - | - | -   |
| ALDH2    | 1 | 0 | - | -   | -   | - | - | -   |
| ALDH3B2  | 1 | 0 | - | -   | -   | - | - | -   |
| ALDH5A1  | 1 | 1 | - | -   | -   | - | - | -   |
| ALDH7A1  | 1 | 0 | - | -   | -   | - | - | -   |
| ALG1     | 1 | 0 | - | -   | -   | - | - | -   |
| ALG12    | 1 | 0 | - | -   | -   | - | - | -   |
| ALG8     | 1 | 0 | - | -   | -   | - | - | -   |
| ALG9     | 1 | 0 | 1 | -   | -   | - | - | -   |
| ALK      | 1 | 1 | - | -   | Yes | - | - | Yes |
| ALKBH2   | 1 | 0 | - | Yes | -   | - | - | -   |
| ALKBH3   | 1 | 1 | - | Yes | -   | - | - | -   |
| ALKBH7   | 1 | 0 | - | -   | -   | - | - | -   |
| ALOX12   | 1 | 0 | - | -   | -   | - | - | -   |
| ALOX15   | 1 | 2 | - | -   | -   | - | - | -   |
| ALOX15B  | 1 | 2 | - | -   | -   | - | - | -   |
| ALPI     | 1 | 2 | - | -   | -   | - | - | -   |
| ALPK1    | 1 | 3 | - | -   | -   | - | - | -   |
| ALS2     | 1 | 1 | - | -   | -   | - | - | -   |
| AMACR    | 1 | 0 | - | -   | -   | - | - | -   |
| AMBP     | 1 | 0 | - | -   | -   | - | - | -   |
| AMFR     | 1 | 0 | - | -   | -   | - | - | -   |
| AMIGO3   | 1 | 0 | - | -   | -   | - | - | -   |
| AMMECR1  | 1 | 0 | - | -   | -   | - | - | -   |
| AMN      | 1 | 1 | - | -   | -   | - | - | -   |
| AMPD2    | 1 | 1 | - | -   | -   | - | - | -   |
| AMT      | 1 | 0 | - | -   | -   | - | - | -   |
| AMY2B    | 1 | 0 | - | -   | -   | - | - | -   |
| AMZ1     | 1 | 2 | - | -   | -   | - | - | -   |
| AMZ2     | 1 | 0 | - | -   | -   | - | - | -   |
| ANAPC11  | 1 | 0 | - | -   | -   | - | - | -   |
| ANAPC13  | 1 | 0 | - | -   | -   | - | - | -   |
| ANGEL1   | 1 | 2 | - | -   | -   | - | - | -   |
| ANGEL2   | 1 | 0 | - | -   | -   | - | - | -   |
| ANGPTL1  | 1 | 0 | - | -   | -   | - | - | -   |
| ANGPTL3  | 1 | 2 | - | -   | -   | - | - | -   |
| ANGPTL6  | 1 | 0 | - | -   | -   | - | - | -   |
| ANGPTL7  | 1 | 2 | - | -   | -   | - | - | -   |
| ANK3     | 1 | 0 | - | -   | -   | - | - | -   |
| ANKDD1A  | 1 | 1 | - | -   | -   | - | - | -   |
| ANKDD1B  | 1 | 0 | 1 | -   | -   | - | - | -   |
| ANKEF1   | 1 | 0 | - | -   | -   | - | - | -   |
| ANKRA2   | 1 | 0 | - | -   | -   | - | - | -   |
| ANKRD12  | 1 | 0 | - | -   | -   | - | - | -   |
| ANKRD23  | 1 | 2 | - | -   | -   | - | - | -   |
| ANKRD24  | 1 | 0 | - | -   | -   | - | - | -   |
| ANKRD26  | 1 | 3 | - | -   | -   | - | - | -   |
| ANKRD27  | 1 | 2 | - | -   | -   | - | - | -   |
| ANKRD30A | 1 | 2 | - | -   | -   | - | - | -   |
| ANKRD31  | 1 | 3 | - | -   | -   | - | - | -   |
| ANKRD34A | 1 | 0 | - | -   | -   | - | - | -   |
| ANKRD6   | 1 | 1 | - | -   | -   | - | - | -   |
| ANKRD61  | 1 | 0 | - | -   | -   | - | - | -   |
| ANKS6    | 1 | 0 | - | -   | -   | - | - | -   |
| ANO10    | 1 | 4 | - | -   | -   | - | - | -   |
| ANO2     | 1 | 0 | 2 | -   | -   | - | - | -   |
| ANO5     | 1 | 1 | - | -   | -   | - | - | -   |
| ANO6     | 1 | 2 | - | -   | -   | - | - | -   |
| ANO9     | 1 | 2 | - | -   | -   | - | - | -   |
| AOAH     | 1 | 1 | - | -   | -   | - | - | -   |
| AOC2     | 1 | 3 | - | -   | -   | - | - | -   |
| APIAR    | 1 | 0 | - | -   | -   | - | - | -   |
| APIM2    | 1 | 1 | - | -   | -   | - | - | -   |
| AP3B2    | 1 | 0 | - | Yes | -   | - | - | -   |
| AP3M2    | 1 | 0 | - | -   | -   | - | - | -   |
| AP4B1    | 1 | 0 | 1 | -   | -   | - | - | -   |
| APAF1    | 1 | 2 | - | -   | -   | - | - | -   |
| APBA3    | 1 | 3 | - | -   | -   | - | - | -   |
| APBB2    | 1 | 0 | - | -   | -   | - | - | -   |
| APC      | 1 | 0 | - | -   | Yes | - | - | Yes |
| APEX1    | 1 | 1 | - | Yes | -   | - | - | -   |
| APLF     | 1 | 1 | - | Yes | -   | - | - | -   |
| APOA1BP  | 1 | 0 | - | -   | -   | - | - | -   |
| APOA5    | 1 | 1 | - | -   | -   | - | - | -   |
| APOBEC3B | 1 | 0 | - | -   | -   | - | - | -   |
| APOBEC3H | 1 | 0 | - | -   | -   | - | - | -   |
| APOBEC4  | 1 | 1 | - | -   | -   | - | - | -   |
| APOC3    | 1 | 0 | - | -   | -   | - | - | -   |
| APTY     | 1 | 0 | - | Yes | -   | - | - | -   |
| ARAP2    | 1 | 1 | - | -   | -   | - | - | -   |
| ARFGEF1  | 1 | 0 | 1 | -   | -   | - | - | -   |
| ARHGAP24 | 1 | 0 | - | -   | -   | - | - | -   |
| ARHGAP31 | 1 | 0 | - | -   | -   | - | - | -   |
| ARHGEF11 | 1 | 1 | - | -   | -   | - | - | -   |
| ARHGEF16 | 1 | 0 | - | -   | -   | - | - | -   |
| ARHGEF19 | 1 | 0 | - | -   | -   | - | - | -   |
| ARHGEF25 | 1 | 0 | - | -   | -   | - | - | -   |

|               |   |   |   |     |     |   |   |     |   |
|---------------|---|---|---|-----|-----|---|---|-----|---|
| ARHGEF38      | 1 | 0 | - | -   | -   | - | - | -   | - |
| ARHGEF39      | 1 | 1 | - | -   | -   | - | - | -   | - |
| ARID2         | 1 | 0 | 1 | -   | Yes | - | - | -   | - |
| ARID5A        | 1 | 0 | - | -   | -   | - | - | -   | - |
| ARL16         | 1 | 0 | - | -   | -   | - | - | -   | - |
| ARL4A         | 1 | 0 | - | -   | -   | - | - | -   | - |
| ARL6IP5       | 1 | 0 | - | -   | -   | - | - | -   | - |
| ARMC10        | 1 | 0 | - | -   | -   | - | - | -   | - |
| ARMC9         | 1 | 0 | - | -   | -   | - | - | -   | - |
| ARMCX5        | 1 | 0 | 1 | -   | -   | - | - | -   | - |
| ARNTL2        | 1 | 1 | - | -   | -   | - | - | -   | - |
| ARRDC1        | 1 | 2 | - | -   | -   | - | - | -   | - |
| ARV1          | 1 | 1 | - | -   | -   | - | - | -   | - |
| ASB10         | 1 | 0 | - | -   | -   | - | - | -   | - |
| ASB16         | 1 | 0 | - | -   | -   | - | - | -   | - |
| ASB4          | 1 | 1 | - | -   | -   | - | - | -   | - |
| ASB8          | 1 | 0 | - | -   | -   | - | - | -   | - |
| ASCL1         | 1 | 0 | - | -   | -   | - | - | -   | - |
| ASCL3         | 1 | 0 | - | -   | -   | - | - | -   | - |
| ASGR2         | 1 | 0 | - | -   | -   | - | - | -   | - |
| ASH2L         | 1 | 0 | - | -   | -   | - | - | -   | - |
| ASIC3         | 1 | 1 | - | -   | -   | - | - | -   | - |
| ASIC5         | 1 | 1 | - | -   | -   | - | - | -   | - |
| ASMT          | 1 | 0 | - | -   | -   | - | - | -   | - |
| ASMTL         | 1 | 0 | - | -   | -   | - | - | -   | - |
| ASPA          | 1 | 0 | - | -   | -   | - | - | -   | - |
| ASTL          | 1 | 0 | 1 | -   | -   | - | - | -   | - |
| ATAD2         | 1 | 0 | - | -   | -   | - | - | -   | - |
| ATAD3A        | 1 | 0 | - | -   | -   | - | - | -   | - |
| ATAD3B        | 1 | 0 | 1 | -   | -   | - | - | -   | - |
| ATF5          | 1 | 1 | - | -   | -   | - | - | -   | - |
| ATG10         | 1 | 0 | - | -   | -   | - | - | -   | - |
| ATG12         | 1 | 0 | - | -   | -   | - | - | -   | - |
| ATG16L2       | 1 | 0 | - | -   | -   | - | - | -   | - |
| ATP10A        | 1 | 0 | - | -   | -   | - | - | -   | - |
| ATP10D        | 1 | 1 | 1 | -   | -   | - | - | -   | - |
| ATP11A        | 1 | 1 | - | -   | -   | - | - | -   | - |
| ATP11C        | 1 | 0 | - | -   | -   | - | - | -   | - |
| ATP13A1       | 1 | 0 | - | -   | -   | - | - | -   | - |
| ATP4B         | 1 | 0 | - | -   | -   | - | - | -   | - |
| ATP5J2-PTCD1  | 1 | 1 | - | -   | -   | - | - | -   | - |
| ATP5SL        | 1 | 0 | - | -   | -   | - | - | -   | - |
| ATP6V0D2      | 1 | 1 | - | -   | -   | - | - | -   | - |
| ATP7B         | 1 | 1 | - | -   | -   | - | - | -   | - |
| ATXN1         | 1 | 0 | - | -   | -   | - | - | -   | - |
| ATXN3         | 1 | 1 | - | Yes | -   | - | - | -   | - |
| ATXN7         | 1 | 1 | - | -   | -   | - | - | -   | - |
| AUH           | 1 | 0 | - | -   | -   | - | - | -   | - |
| AUNIP         | 1 | 0 | - | -   | -   | - | - | -   | - |
| AURKC         | 1 | 0 | - | -   | -   | - | - | -   | - |
| AVIL          | 1 | 2 | - | -   | -   | - | - | -   | - |
| AVPR2         | 1 | 0 | - | -   | -   | - | - | -   | - |
| AXDND1        | 1 | 4 | - | -   | -   | - | - | -   | - |
| CEP131        | 1 | 1 | - | -   | -   | - | - | -   | - |
| B3GALT5       | 1 | 2 | - | -   | -   | - | - | -   | - |
| B3GLCT        | 1 | 0 | - | -   | -   | - | - | -   | - |
| B3GNT3        | 1 | 0 | - | -   | -   | - | - | -   | - |
| B3GNT4        | 1 | 2 | - | -   | -   | - | - | -   | - |
| B3GNT5        | 1 | 0 | - | -   | -   | - | - | -   | - |
| B3GNT6        | 1 | 0 | - | -   | -   | - | - | -   | - |
| B3GNT8        | 1 | 0 | - | -   | -   | - | - | -   | - |
| B4GALNT1      | 1 | 1 | - | -   | -   | - | - | -   | - |
| B4GALNT3      | 1 | 1 | - | -   | -   | - | - | -   | - |
| B4GALT6       | 1 | 0 | - | -   | -   | - | - | -   | - |
| BACE1         | 1 | 1 | - | -   | -   | - | - | -   | - |
| BAG5          | 1 | 0 | - | -   | -   | - | - | -   | - |
| BAGE3         | 1 | 0 | - | -   | -   | - | - | -   | - |
| ADGRB2        | 1 | 0 | 1 | -   | -   | - | - | -   | - |
| BALAP2L1      | 1 | 0 | - | -   | -   | - | - | -   | - |
| BAMB1         | 1 | 0 | - | -   | -   | - | - | -   | - |
| BANF2         | 1 | 0 | - | -   | -   | - | - | -   | - |
| BAP1          | 1 | 0 | - | Yes | Yes | - | - | Yes | - |
| BAX           | 1 | 0 | - | Yes | -   | - | - | -   | - |
| BAZ1B         | 1 | 1 | - | Yes | -   | - | - | -   | - |
| BAZ2B         | 1 | 0 | - | -   | -   | - | - | -   | - |
| BBS2          | 1 | 0 | - | -   | -   | - | - | -   | - |
| BBS9          | 1 | 1 | - | -   | -   | - | - | -   | - |
| BCAM          | 1 | 0 | - | -   | -   | - | - | -   | - |
| BCAN          | 1 | 0 | - | -   | -   | - | - | -   | - |
| BCAR3         | 1 | 0 | - | -   | -   | - | - | -   | - |
| BCAT1         | 1 | 1 | - | -   | -   | - | - | -   | - |
| BCHE          | 1 | 0 | - | -   | -   | - | - | -   | - |
| BCKDHB        | 1 | 0 | - | -   | -   | - | - | -   | - |
| BCL2L12       | 1 | 0 | - | -   | -   | - | - | -   | - |
| BCL2L2-PABPN1 | 1 | 1 | - | -   | -   | - | - | -   | - |
| BCL7C         | 1 | 1 | - | -   | -   | - | - | -   | - |
| BCLAF1        | 1 | 3 | 1 | -   | -   | - | - | -   | - |
| BCO1          | 1 | 0 | - | -   | -   | - | - | -   | - |
| BCO2          | 1 | 2 | - | -   | -   | - | - | -   | - |
| BDH1          | 1 | 0 | - | -   | -   | - | - | -   | - |
| BDKRB1        | 1 | 0 | - | -   | -   | - | - | -   | - |
| BDNF          | 1 | 2 | - | -   | -   | - | - | -   | - |
| BGLAP         | 1 | 0 | - | -   | -   | - | - | -   | - |
| BHLHA15       | 1 | 1 | - | -   | -   | - | - | -   | - |
| BHLHA9        | 1 | 0 | - | -   | -   | - | - | -   | - |
| BHMT2         | 1 | 1 | - | -   | -   | - | - | -   | - |
| BICD2         | 1 | 0 | 1 | -   | -   | - | - | -   | - |
| BIN1          | 1 | 0 | 1 | -   | -   | - | - | -   | - |
| BIRC5         | 1 | 0 | - | -   | -   | - | - | -   | - |
| BIRC7         | 1 | 0 | - | -   | -   | - | - | -   | - |
| BLM           | 1 | 3 | - | Yes | -   | - | - | Yes | - |
| BLNK          | 1 | 0 | - | -   | -   | - | - | -   | - |
| BLOCS4        | 1 | 0 | - | -   | -   | - | - | -   | - |
| BMP1          | 1 | 0 | - | -   | -   | - | - | -   | - |
| BMP8A         | 1 | 0 | - | -   | -   | - | - | -   | - |
| BMPER         | 1 | 1 | - | -   | -   | - | - | -   | - |

|           |   |   |   |     |   |   |   |   |   |
|-----------|---|---|---|-----|---|---|---|---|---|
| BNC1      | 1 | 0 | - | -   | - | - | - | - | - |
| BNIP2     | 1 | 0 | - | -   | - | - | - | - | - |
| BOK       | 1 | 0 | - | -   | - | - | - | - | - |
| BPGM      | 1 | 0 | - | -   | - | - | - | - | - |
| BPIFA1    | 1 | 0 | - | -   | - | - | - | - | - |
| BPIFB3    | 1 | 0 | - | -   | - | - | - | - | - |
| BPIFB4    | 1 | 0 | - | -   | - | - | - | - | - |
| BPIFB6    | 1 | 0 | - | -   | - | - | - | - | - |
| BPIFC     | 1 | 0 | - | -   | - | - | - | - | - |
| BRAT1     | 1 | 2 | - | -   | - | - | - | - | - |
| BRD8      | 1 | 1 | - | -   | - | - | - | - | - |
| BRDT      | 1 | 1 | - | -   | - | - | - | - | - |
| BRF1      | 1 | 1 | - | -   | - | - | - | - | - |
| BRWD1     | 1 | 0 | - | -   | - | - | - | - | - |
| BTBD6     | 1 | 0 | - | -   | - | - | - | - | - |
| BTBD7     | 1 | 0 | - | -   | - | - | - | - | - |
| BTN2A1    | 1 | 2 | - | -   | - | - | - | - | - |
| ACSM6     | 1 | 1 | - | -   | - | - | - | - | - |
| C10orf2   | 1 | 0 | - | -   | - | - | - | - | - |
| C10orf35  | 1 | 1 | - | -   | - | - | - | - | - |
| C10orf55  | 1 | 1 | - | -   | - | - | - | - | - |
| C10orf88  | 1 | 0 | - | -   | - | - | - | - | - |
| C10orf90  | 1 | 0 | 1 | -   | - | - | - | - | - |
| C11orf24  | 1 | 0 | - | -   | - | - | - | - | - |
| C11orf30  | 1 | 0 | - | Yes | - | - | - | - | - |
| C11orf31  | 1 | 2 | - | -   | - | - | - | - | - |
| C11orf52  | 1 | 0 | - | -   | - | - | - | - | - |
| C11orf54  | 1 | 2 | - | -   | - | - | - | - | - |
| C11orf63  | 1 | 0 | - | -   | - | - | - | - | - |
| C11orf65  | 1 | 2 | - | -   | - | - | - | - | - |
| C11orf73  | 1 | 0 | - | -   | - | - | - | - | - |
| C11orf74  | 1 | 0 | - | -   | - | - | - | - | - |
| C11orf80  | 1 | 1 | - | -   | - | - | - | - | - |
| C12orf10  | 1 | 1 | - | -   | - | - | - | - | - |
| C12orf40  | 1 | 0 | - | -   | - | - | - | - | - |
| C12orf42  | 1 | 1 | - | -   | - | - | - | - | - |
| C12orf56  | 1 | 0 | - | -   | - | - | - | - | - |
| C14orf105 | 1 | 1 | - | -   | - | - | - | - | - |
| LRRC74A   | 1 | 1 | - | -   | - | - | - | - | - |
| C14orf180 | 1 | 0 | - | -   | - | - | - | - | - |
| LINC01588 | 1 | 0 | - | -   | - | - | - | - | - |
| LINC01599 | 1 | 0 | - | -   | - | - | - | - | - |
| C14orf28  | 1 | 1 | - | -   | - | - | - | - | - |
| C14orf37  | 1 | 0 | - | -   | - | - | - | - | - |
| C14orf79  | 1 | 1 | - | -   | - | - | - | - | - |
| C14orf80  | 1 | 1 | - | -   | - | - | - | - | - |
| C15orf41  | 1 | 2 | - | -   | - | - | - | - | - |
| C15orf48  | 1 | 0 | - | -   | - | - | - | - | - |
| C15orf52  | 1 | 1 | - | -   | - | - | - | - | - |
| C16orf46  | 1 | 0 | - | -   | - | - | - | - | - |
| SPATA33   | 1 | 0 | - | -   | - | - | - | - | - |
| C16orf59  | 1 | 0 | - | -   | - | - | - | - | - |
| C16orf86  | 1 | 0 | - | -   | - | - | - | - | - |
| C16orf90  | 1 | 0 | - | -   | - | - | - | - | - |
| C16orf92  | 1 | 1 | - | -   | - | - | - | - | - |
| C16orf93  | 1 | 1 | 1 | -   | - | - | - | - | - |
| C16orf97  | 1 | 0 | - | -   | - | - | - | - | - |
| C17orf102 | 1 | 1 | - | -   | - | - | - | - | - |
| NATD1     | 1 | 0 | - | -   | - | - | - | - | - |
| C17orf47  | 1 | 1 | - | -   | - | - | - | - | - |
| C17orf51  | 1 | 1 | - | -   | - | - | - | - | - |
| C17orf53  | 1 | 0 | - | -   | - | - | - | - | - |
| C17orf58  | 1 | 0 | - | -   | - | - | - | - | - |
| C17orf64  | 1 | 0 | - | -   | - | - | - | - | - |
| C17orf74  | 1 | 1 | - | -   | - | - | - | - | - |
| C17orf99  | 1 | 1 | - | -   | - | - | - | - | - |
| C18orf32  | 1 | 0 | - | -   | - | - | - | - | - |
| C18orf63  | 1 | 0 | - | -   | - | - | - | - | - |
| C19orf24  | 1 | 0 | - | -   | - | - | - | - | - |
| C19orf44  | 1 | 0 | - | -   | - | - | - | - | - |
| C19orf45  | 1 | 0 | - | -   | - | - | - | - | - |
| C19orf48  | 1 | 0 | - | -   | - | - | - | - | - |
| PROSER3   | 1 | 3 | - | -   | - | - | - | - | - |
| C19orf71  | 1 | 0 | - | -   | - | - | - | - | - |
| SMIM24    | 1 | 0 | - | -   | - | - | - | - | - |
| C19orf80  | 1 | 0 | - | -   | - | - | - | - | - |
| C1orf105  | 1 | 1 | - | -   | - | - | - | - | - |
| C1orf106  | 1 | 0 | - | -   | - | - | - | - | - |
| C1orf123  | 1 | 1 | - | -   | - | - | - | - | - |
| C1orf131  | 1 | 0 | - | -   | - | - | - | - | - |
| C1orf141  | 1 | 0 | - | -   | - | - | - | - | - |
| C1orf168  | 1 | 0 | - | -   | - | - | - | - | - |
| C1orf186  | 1 | 1 | - | -   | - | - | - | - | - |
| C1orf189  | 1 | 1 | - | -   | - | - | - | - | - |
| C1orf194  | 1 | 0 | - | -   | - | - | - | - | - |
| C1orf198  | 1 | 0 | - | -   | - | - | - | - | - |
| C1orf216  | 1 | 0 | - | -   | - | - | - | - | - |
| C1orf53   | 1 | 0 | - | -   | - | - | - | - | - |
| C1orf56   | 1 | 0 | - | -   | - | - | - | - | - |
| C1orf61   | 1 | 0 | - | -   | - | - | - | - | - |
| RSRP1     | 1 | 1 | - | -   | - | - | - | - | - |
| CCDC185   | 1 | 0 | - | -   | - | - | - | - | - |
| FAAP20    | 1 | 2 | - | -   | - | - | - | - | - |
| C1orf87   | 1 | 0 | - | -   | - | - | - | - | - |
| C1orf94   | 1 | 0 | - | -   | - | - | - | - | - |
| C1QBP     | 1 | 0 | - | -   | - | - | - | - | - |
| C1QTNF3   | 1 | 0 | - | -   | - | - | - | - | - |
| C1QTNF8   | 1 | 0 | - | -   | - | - | - | - | - |
| C20orf144 | 1 | 0 | - | -   | - | - | - | - | - |
| C20orf173 | 1 | 0 | - | -   | - | - | - | - | - |
| CFAP61    | 1 | 3 | 1 | -   | - | - | - | - | - |
| C20orf27  | 1 | 0 | - | -   | - | - | - | - | - |
| C20orf85  | 1 | 0 | - | -   | - | - | - | - | - |
| C21orf59  | 1 | 0 | - | -   | - | - | - | - | - |
| C2CD3     | 1 | 2 | - | -   | - | - | - | - | - |
| C2CD4B    | 1 | 0 | - | -   | - | - | - | - | - |



|                |   |   |   |   |     |   |   |     |   |
|----------------|---|---|---|---|-----|---|---|-----|---|
| CCDC148        | 1 | 2 | - | - | -   | - | - | -   | - |
| CCDC15         | 1 | 1 | - | - | -   | - | - | -   | - |
| CCDC153        | 1 | 0 | - | - | -   | - | - | -   | - |
| CCDC157        | 1 | 0 | - | - | -   | - | - | -   | - |
| CCDC158        | 1 | 0 | - | - | -   | - | - | -   | - |
| CCDC168        | 1 | 3 | - | - | -   | - | - | -   | - |
| CCDC169-SOHLH2 | 1 | 0 | - | - | -   | - | - | -   | - |
| CCDC17         | 1 | 1 | - | - | -   | - | - | -   | - |
| CCDC172        | 1 | 0 | - | - | -   | - | - | -   | - |
| CCDC175        | 1 | 2 | 1 | - | -   | - | - | -   | - |
| CCDC178        | 1 | 1 | - | - | -   | - | - | -   | - |
| CCDC181        | 1 | 0 | - | - | -   | - | - | -   | - |
| CCDC27         | 1 | 3 | - | - | -   | - | - | -   | - |
| CCDC28B        | 1 | 0 | - | - | -   | - | - | -   | - |
| CCDC34         | 1 | 1 | - | - | -   | - | - | -   | - |
| CCDC37         | 1 | 0 | - | - | -   | - | - | -   | - |
| CCDC57         | 1 | 2 | - | - | -   | - | - | -   | - |
| CCDC64B        | 1 | 0 | - | - | -   | - | - | -   | - |
| CCDC73         | 1 | 1 | - | - | -   | - | - | -   | - |
| CCDC74A        | 1 | 0 | - | - | -   | - | - | -   | - |
| CCDC78         | 1 | 0 | - | - | -   | - | - | -   | - |
| CCDC81         | 1 | 1 | - | - | -   | - | - | -   | - |
| CCDC82         | 1 | 0 | - | - | -   | - | - | -   | - |
| CCDC87         | 1 | 2 | - | - | -   | - | - | -   | - |
| CCDC88B        | 1 | 2 | - | - | -   | - | - | -   | - |
| CCDC90B        | 1 | 1 | - | - | -   | - | - | -   | - |
| CCDC96         | 1 | 0 | - | - | -   | - | - | -   | - |
| CCCL11         | 1 | 0 | - | - | -   | - | - | -   | - |
| CCNJL          | 1 | 0 | - | - | -   | - | - | -   | - |
| CCP110         | 1 | 1 | - | - | -   | - | - | -   | - |
| CCR3           | 1 | 1 | - | - | -   | - | - | -   | - |
| CCR7           | 1 | 0 | - | - | -   | - | - | -   | - |
| NOCT           | 1 | 0 | - | - | -   | - | - | -   | - |
| CCS            | 1 | 1 | - | - | -   | - | - | -   | - |
| CCT5           | 1 | 0 | - | - | -   | - | - | -   | - |
| CD160          | 1 | 0 | - | - | -   | - | - | -   | - |
| CD163L1        | 1 | 1 | 1 | - | -   | - | - | -   | - |
| CD1B           | 1 | 0 | - | - | -   | - | - | -   | - |
| CD1C           | 1 | 1 | - | - | -   | - | - | -   | - |
| CD209          | 1 | 0 | - | - | -   | - | - | -   | - |
| CD22           | 1 | 0 | - | - | -   | - | - | -   | - |
| CD247          | 1 | 0 | - | - | -   | - | - | -   | - |
| CD248          | 1 | 0 | - | - | -   | - | - | -   | - |
| CD276          | 1 | 0 | - | - | -   | - | - | -   | - |
| CD2AP          | 1 | 1 | - | - | -   | - | - | -   | - |
| CD300LB        | 1 | 0 | - | - | -   | - | - | -   | - |
| CD38           | 1 | 1 | - | - | -   | - | - | -   | - |
| CD70           | 1 | 0 | 1 | - | -   | - | - | -   | - |
| CD72           | 1 | 1 | - | - | -   | - | - | -   | - |
| CD88           | 1 | 1 | - | - | -   | - | - | -   | - |
| CDADC1         | 1 | 2 | - | - | -   | - | - | -   | - |
| CDAN1          | 1 | 0 | - | - | -   | - | - | -   | - |
| CDG14A         | 1 | 0 | - | - | -   | - | - | -   | - |
| CDG20B         | 1 | 1 | - | - | -   | - | - | -   | - |
| CDG25C         | 1 | 0 | - | - | Yes | - | - | -   | - |
| CDG27          | 1 | 0 | - | - | -   | - | - | -   | - |
| CDG42BPG       | 1 | 0 | - | - | -   | - | - | -   | - |
| CDG42EP5       | 1 | 0 | - | - | -   | - | - | -   | - |
| CDG6           | 1 | 1 | - | - | Yes | - | - | -   | - |
| CDCA2          | 1 | 1 | - | - | -   | - | - | -   | - |
| CDCA8          | 1 | 0 | - | - | -   | - | - | -   | - |
| CDCP1          | 1 | 1 | - | - | -   | - | - | -   | - |
| CDCP2          | 1 | 3 | - | - | -   | - | - | -   | - |
| CDH10          | 1 | 0 | - | - | -   | - | - | -   | - |
| CDH13          | 1 | 0 | - | - | Yes | - | - | -   | - |
| CDH17          | 1 | 1 | - | - | -   | - | - | -   | - |
| CDH18          | 1 | 0 | - | - | -   | - | - | -   | - |
| CDH19          | 1 | 0 | 2 | - | -   | - | - | -   | - |
| CDH22          | 1 | 1 | 1 | - | -   | - | - | -   | - |
| CDH23          | 1 | 0 | 1 | - | -   | - | - | -   | - |
| CDH24          | 1 | 0 | - | - | -   | - | - | -   | - |
| CDH8           | 1 | 0 | 1 | - | -   | - | - | -   | - |
| CDHR3          | 1 | 2 | - | - | -   | - | - | -   | - |
| CDK10          | 1 | 1 | - | - | -   | - | - | -   | - |
| CDK11A         | 1 | 0 | - | - | -   | - | - | -   | - |
| CDK15          | 1 | 2 | - | - | -   | - | - | -   | - |
| CDK3           | 1 | 1 | - | - | -   | - | - | -   | - |
| CDK4           | 1 | 0 | - | - | Yes | - | - | Yes | - |
| CDK5R1         | 1 | 0 | - | - | -   | - | - | -   | - |
| CDK5RAP2       | 1 | 4 | - | - | -   | - | - | -   | - |
| CDKL1          | 1 | 0 | - | - | -   | - | - | -   | - |
| CDKN1A         | 1 | 1 | - | - | -   | - | - | -   | - |
| CDON           | 1 | 2 | - | - | -   | - | - | -   | - |
| CDPF1          | 1 | 0 | - | - | -   | - | - | -   | - |
| CDRT15L2       | 1 | 0 | - | - | -   | - | - | -   | - |
| CEACAM4        | 1 | 0 | - | - | -   | - | - | -   | - |
| CEACAM5        | 1 | 0 | - | - | -   | - | - | -   | - |
| CELA2A         | 1 | 1 | - | - | -   | - | - | -   | - |
| CELA2B         | 1 | 0 | - | - | -   | - | - | -   | - |
| CELF6          | 1 | 1 | 1 | - | -   | - | - | -   | - |
| CELSR1         | 1 | 2 | - | - | -   | - | - | -   | - |
| CENPH          | 1 | 1 | - | - | -   | - | - | -   | - |
| CENPM          | 1 | 0 | - | - | -   | - | - | -   | - |
| CENPO          | 1 | 1 | - | - | -   | - | - | -   | - |
| CEP112         | 1 | 3 | - | - | -   | - | - | -   | - |
| CEP135         | 1 | 4 | - | - | -   | - | - | -   | - |
| CEP164         | 1 | 1 | - | - | Yes | - | - | -   | - |
| CEP170B        | 1 | 0 | - | - | -   | - | - | -   | - |
| CEP350         | 1 | 1 | - | - | -   | - | - | -   | - |
| CEP44          | 1 | 0 | - | - | -   | - | - | -   | - |
| CEP55          | 1 | 1 | - | - | -   | - | - | -   | - |
| CEP63          | 1 | 2 | - | - | -   | - | - | -   | - |
| CEP70          | 1 | 1 | - | - | -   | - | - | -   | - |
| CEP78          | 1 | 0 | - | - | -   | - | - | -   | - |
| CEP85          | 1 | 1 | - | - | -   | - | - | -   | - |
| CEP85L         | 1 | 0 | - | - | -   | - | - | -   | - |



|             |   |   |   |     |   |   |   |     |   |
|-------------|---|---|---|-----|---|---|---|-----|---|
| CEP95       | 1 | 2 | - | -   | - | - | - | -   | - |
| CEP97       | 1 | 2 | - | -   | - | - | - | -   | - |
| CERCAM      | 1 | 2 | - | -   | - | - | - | -   | - |
| CERS4       | 1 | 0 | 1 | -   | - | - | - | -   | - |
| CESSA       | 1 | 4 | - | -   | - | - | - | -   | - |
| CETP        | 1 | 0 | - | -   | - | - | - | -   | - |
| CFD         | 1 | 0 | - | -   | - | - | - | -   | - |
| CFHR3       | 1 | 0 | - | -   | - | - | - | -   | - |
| CFI         | 1 | 2 | - | -   | - | - | - | -   | - |
| CFL2        | 1 | 0 | - | -   | - | - | - | -   | - |
| CFLAR       | 1 | 0 | - | -   | - | - | - | -   | - |
| CGREF1      | 1 | 1 | - | -   | - | - | - | -   | - |
| CGRRF1      | 1 | 0 | - | -   | - | - | - | -   | - |
| CHAC2       | 1 | 0 | - | -   | - | - | - | -   | - |
| CHAT        | 1 | 0 | - | -   | - | - | - | -   | - |
| CFAP47      | 1 | 0 | - | -   | - | - | - | -   | - |
| CHDH        | 1 | 1 | - | -   | - | - | - | -   | - |
| CHEK2       | 1 | 3 | - | Yes | - | - | - | Yes | - |
| CHIA        | 1 | 2 | - | -   | - | - | - | -   | - |
| CHMP1A      | 1 | 0 | - | -   | - | - | - | -   | - |
| CHMP4A      | 1 | 0 | - | -   | - | - | - | -   | - |
| CHMP7       | 1 | 0 | - | -   | - | - | - | -   | - |
| CHPF        | 1 | 1 | - | -   | - | - | - | -   | - |
| CHPF2       | 1 | 2 | - | -   | - | - | - | -   | - |
| CHRD        | 1 | 0 | 1 | -   | - | - | - | -   | - |
| CHRNA5      | 1 | 1 | - | -   | - | - | - | -   | - |
| CHRNA6      | 1 | 1 | - | -   | - | - | - | -   | - |
| CHRNA9      | 1 | 2 | - | -   | - | - | - | -   | - |
| CHRNA9      | 1 | 1 | - | -   | - | - | - | -   | - |
| CHST5       | 1 | 0 | - | -   | - | - | - | -   | - |
| CHST8       | 1 | 0 | - | -   | - | - | - | -   | - |
| CHTF18      | 1 | 1 | - | -   | - | - | - | -   | - |
| CHURC1      | 1 | 0 | - | -   | - | - | - | -   | - |
| CHURC1-FNTB | 1 | 1 | - | -   | - | - | - | -   | - |
| CIB4        | 1 | 0 | - | -   | - | - | - | -   | - |
| CIDEA       | 1 | 1 | - | -   | - | - | - | -   | - |
| CIT         | 1 | 0 | - | -   | - | - | - | -   | - |
| CITED4      | 1 | 0 | - | -   | - | - | - | -   | - |
| CKAP2       | 1 | 1 | - | -   | - | - | - | -   | - |
| CLC         | 1 | 0 | - | -   | - | - | - | -   | - |
| CLCA4       | 1 | 1 | - | -   | - | - | - | -   | - |
| CLCC1       | 1 | 0 | - | -   | - | - | - | -   | - |
| CLCN1       | 1 | 3 | - | -   | - | - | - | -   | - |
| CLCN6       | 1 | 0 | - | -   | - | - | - | -   | - |
| CLDN17      | 1 | 0 | - | -   | - | - | - | -   | - |
| CLDN23      | 1 | 0 | - | -   | - | - | - | -   | - |
| CLEC10A     | 1 | 1 | - | -   | - | - | - | -   | - |
| CLEC11A     | 1 | 0 | - | -   | - | - | - | -   | - |
| CLEC12A     | 1 | 1 | - | -   | - | - | - | -   | - |
| CLEC1A      | 1 | 1 | - | -   | - | - | - | -   | - |
| CLEC2L      | 1 | 1 | - | -   | - | - | - | -   | - |
| CLEC4C      | 1 | 1 | - | -   | - | - | - | -   | - |
| CLEC7A      | 1 | 1 | - | -   | - | - | - | -   | - |
| CLGN        | 1 | 0 | - | -   | - | - | - | -   | - |
| CLHC1       | 1 | 0 | - | -   | - | - | - | -   | - |
| CLK1        | 1 | 1 | - | -   | - | - | - | -   | - |
| CLMN        | 1 | 0 | - | -   | - | - | - | -   | - |
| CLNS1A      | 1 | 2 | - | -   | - | - | - | -   | - |
| CLPSL1      | 1 | 2 | - | -   | - | - | - | -   | - |
| CLPTMIL     | 1 | 1 | - | -   | - | - | - | -   | - |
| CLRNI       | 1 | 1 | - | -   | - | - | - | -   | - |
| CLUL1       | 1 | 1 | - | -   | - | - | - | -   | - |
| CLYBL       | 1 | 0 | - | -   | - | - | - | -   | - |
| CMC2        | 1 | 1 | - | -   | - | - | - | -   | - |
| CMTM5       | 1 | 1 | - | -   | - | - | - | -   | - |
| CNBD1       | 1 | 1 | - | -   | - | - | - | -   | - |
| CNBD2       | 1 | 1 | - | -   | - | - | - | -   | - |
| CNBP        | 1 | 0 | - | -   | - | - | - | -   | - |
| CNGB1       | 1 | 1 | - | -   | - | - | - | -   | - |
| CNOT4       | 1 | 0 | - | -   | - | - | - | -   | - |
| CNTD1       | 1 | 0 | - | -   | - | - | - | -   | - |
| CNTD2       | 1 | 0 | - | -   | - | - | - | -   | - |
| CNTLN       | 1 | 1 | - | Yes | - | - | - | -   | - |
| CNTN2       | 1 | 0 | - | -   | - | - | - | -   | - |
| CNTN5       | 1 | 1 | - | -   | - | - | - | -   | - |
| CNTRL       | 1 | 6 | - | -   | - | - | - | -   | - |
| COASY       | 1 | 0 | - | -   | - | - | - | -   | - |
| COG1        | 1 | 2 | - | -   | - | - | - | -   | - |
| COG5        | 1 | 1 | - | -   | - | - | - | -   | - |
| COG7        | 1 | 1 | - | -   | - | - | - | -   | - |
| COL13A1     | 1 | 0 | - | -   | - | - | - | -   | - |
| COL14A1     | 1 | 2 | - | -   | - | - | - | -   | - |
| COL18A1     | 1 | 1 | - | -   | - | - | - | -   | - |
| COL24A1     | 1 | 3 | - | -   | - | - | - | -   | - |
| COL26A1     | 1 | 0 | - | -   | - | - | - | -   | - |
| COL4A2      | 1 | 2 | - | -   | - | - | - | -   | - |
| COL4A4      | 1 | 0 | - | -   | - | - | - | -   | - |
| COL6A3      | 1 | 1 | - | -   | - | - | - | -   | - |
| COL9A3      | 1 | 1 | - | -   | - | - | - | -   | - |
| COMMDD6     | 1 | 0 | - | -   | - | - | - | -   | - |
| COMP        | 1 | 1 | - | -   | - | - | - | -   | - |
| COPG2       | 1 | 1 | - | -   | - | - | - | -   | - |
| COPZ1       | 1 | 0 | - | -   | - | - | - | -   | - |
| COQ4        | 1 | 0 | - | -   | - | - | - | -   | - |
| COQ5        | 1 | 0 | - | -   | - | - | - | -   | - |
| COQ9        | 1 | 0 | 1 | -   | - | - | - | -   | - |
| CORO1C      | 1 | 0 | - | -   | - | - | - | -   | - |
| COX20       | 1 | 0 | - | -   | - | - | - | -   | - |
| CPA1        | 1 | 1 | - | -   | - | - | - | Yes | - |
| CPA3        | 1 | 0 | - | -   | - | - | - | -   | - |
| CPB1        | 1 | 1 | 1 | -   | - | - | - | -   | - |
| CPEB3       | 1 | 1 | - | -   | - | - | - | -   | - |
| CPM         | 1 | 0 | - | -   | - | - | - | -   | - |
| CPN1        | 1 | 1 | - | -   | - | - | - | -   | - |
| CPNE1       | 1 | 0 | - | -   | - | - | - | -   | - |
| CPPED1      | 1 | 0 | - | -   | - | - | - | -   | - |





|            |   |   |   |     |     |   |   |     |   |
|------------|---|---|---|-----|-----|---|---|-----|---|
| EIF5A      | 1 | 0 | - | -   | -   | - | - | -   | - |
| ELF5       | 1 | 0 | - | -   | -   | - | - | -   | - |
| ELK3       | 1 | 0 | - | -   | -   | - | - | -   | - |
| ELMO2      | 1 | 0 | 1 | -   | -   | - | - | -   | - |
| ELN        | 1 | 0 | - | -   | -   | - | - | -   | - |
| ADGRL4     | 1 | 0 | - | -   | -   | - | - | -   | - |
| EME1       | 1 | 2 | - | Yes | -   | - | - | -   | - |
| EMILIN3    | 1 | 0 | - | -   | -   | - | - | -   | - |
| EML1       | 1 | 0 | - | -   | -   | - | - | -   | - |
| EML2       | 1 | 0 | - | -   | -   | - | - | -   | - |
| EML3       | 1 | 0 | - | -   | -   | - | - | -   | - |
| EML4       | 1 | 2 | - | -   | -   | - | - | -   | - |
| EML5       | 1 | 1 | - | -   | -   | - | - | -   | - |
| EMP2       | 1 | 1 | - | -   | -   | - | - | -   | - |
| ENAM       | 1 | 0 | - | -   | -   | - | - | -   | - |
| ENDOD1     | 1 | 1 | - | -   | -   | - | - | -   | - |
| ENDOG      | 1 | 1 | - | -   | -   | - | - | -   | - |
| ENDOU      | 1 | 1 | - | -   | -   | - | - | -   | - |
| ENDOV      | 1 | 0 | - | -   | -   | - | - | -   | - |
| ENOSF1     | 1 | 1 | - | -   | -   | - | - | -   | - |
| ENOX1      | 1 | 0 | - | -   | -   | - | - | -   | - |
| ENPEP      | 1 | 0 | - | -   | -   | - | - | -   | - |
| ENPP6      | 1 | 0 | - | -   | -   | - | - | -   | - |
| ENPP7      | 1 | 0 | - | -   | -   | - | - | -   | - |
| ENTPD2     | 1 | 0 | - | -   | -   | - | - | -   | - |
| ENTPD6     | 1 | 1 | - | -   | -   | - | - | -   | - |
| ENTPD8     | 1 | 0 | - | -   | -   | - | - | -   | - |
| EP300      | 1 | 0 | - | Yes | Yes | - | - | Yes | - |
| EPB41L3    | 1 | 1 | - | -   | -   | - | - | -   | - |
| EPDR1      | 1 | 1 | - | -   | -   | - | - | -   | - |
| EPHA8      | 1 | 1 | 1 | -   | -   | - | - | -   | - |
| EPHB1      | 1 | 0 | 1 | -   | -   | - | - | -   | - |
| EPHX2      | 1 | 1 | - | -   | -   | - | - | -   | - |
| EPN2       | 1 | 1 | - | -   | -   | - | - | -   | - |
| EPN3       | 1 | 0 | - | -   | -   | - | - | -   | - |
| EPS8L2     | 1 | 0 | - | -   | -   | - | - | -   | - |
| EPS8L3     | 1 | 0 | - | -   | -   | - | - | -   | - |
| EPST11     | 1 | 0 | - | -   | -   | - | - | -   | - |
| EPT1       | 1 | 0 | 1 | -   | -   | - | - | -   | - |
| EQTN       | 1 | 1 | - | -   | -   | - | - | -   | - |
| ERAL1      | 1 | 0 | - | -   | -   | - | - | -   | - |
| ERBB3      | 1 | 3 | - | -   | -   | - | - | -   | - |
| ERC1       | 1 | 0 | - | -   | -   | - | - | -   | - |
| ERCC1      | 1 | 0 | - | Yes | -   | - | - | -   | - |
| ERCC3      | 1 | 3 | - | Yes | -   | - | - | Yes | - |
| ERCC6      | 1 | 3 | - | Yes | -   | - | - | -   | - |
| ERCC6L     | 1 | 0 | - | -   | -   | - | - | -   | - |
| ERF        | 1 | 0 | 1 | -   | -   | - | - | -   | - |
| ERGIC3     | 1 | 1 | - | -   | -   | - | - | -   | - |
| ERL2       | 1 | 3 | - | -   | -   | - | - | -   | - |
| ERICH1     | 1 | 0 | - | -   | -   | - | - | -   | - |
| ERN2       | 1 | 1 | - | -   | -   | - | - | -   | - |
| ERO1B      | 1 | 2 | - | -   | -   | - | - | -   | - |
| ERV3-1     | 1 | 0 | - | -   | -   | - | - | -   | - |
| ERVMER34-1 | 1 | 2 | - | -   | -   | - | - | -   | - |
| ESAM       | 1 | 0 | - | -   | -   | - | - | -   | - |
| ESD        | 1 | 2 | - | -   | -   | - | - | -   | - |
| ESPNL      | 1 | 1 | 1 | -   | -   | - | - | -   | - |
| ESR2       | 1 | 0 | - | -   | -   | - | - | -   | - |
| ESYT1      | 1 | 2 | - | -   | -   | - | - | -   | - |
| ETS2       | 1 | 0 | - | Yes | -   | - | - | -   | - |
| ETV2       | 1 | 0 | - | -   | -   | - | - | -   | - |
| ETV3       | 1 | 0 | - | -   | -   | - | - | -   | - |
| ETV4       | 1 | 0 | - | -   | -   | - | - | -   | - |
| ETV7       | 1 | 2 | - | Yes | -   | - | - | -   | - |
| EVC        | 1 | 2 | 1 | -   | -   | - | - | -   | - |
| EVC2       | 1 | 2 | - | -   | -   | - | - | -   | - |
| EVL        | 1 | 0 | - | -   | -   | - | - | -   | - |
| EYPL       | 1 | 2 | 2 | -   | -   | - | - | -   | - |
| EXOC3L1    | 1 | 0 | 1 | -   | -   | - | - | -   | - |
| EXOC3L4    | 1 | 1 | - | -   | -   | - | - | -   | - |
| EXOSC7     | 1 | 0 | - | -   | -   | - | - | -   | - |
| F13A1      | 1 | 0 | - | -   | -   | - | - | -   | - |
| F13B       | 1 | 0 | - | -   | -   | - | - | -   | - |
| F2R        | 1 | 1 | - | -   | -   | - | - | -   | - |
| F2RL1      | 1 | 1 | - | -   | -   | - | - | -   | - |
| F2RL3      | 1 | 0 | - | -   | -   | - | - | -   | - |
| FAAH       | 1 | 0 | - | -   | -   | - | - | -   | - |
| FABP4      | 1 | 0 | - | -   | -   | - | - | -   | - |
| FAF1       | 1 | 0 | - | -   | -   | - | - | -   | - |
| FAHD1      | 1 | 2 | - | -   | -   | - | - | -   | - |
| FAIM       | 1 | 0 | - | -   | -   | - | - | -   | - |
| FAM102B    | 1 | 0 | - | -   | -   | - | - | -   | - |
| FAM103A    | 1 | 0 | - | -   | -   | - | - | -   | - |
| OTULIN     | 1 | 0 | - | -   | -   | - | - | -   | - |
| FAM107A    | 1 | 0 | - | -   | -   | - | - | -   | - |
| FAM109B    | 1 | 0 | - | -   | -   | - | - | -   | - |
| FAM118A    | 1 | 0 | - | -   | -   | - | - | -   | - |
| FAM124B    | 1 | 1 | - | -   | -   | - | - | -   | - |
| FAM129A    | 1 | 1 | - | -   | -   | - | - | -   | - |
| FAM129B    | 1 | 0 | - | -   | -   | - | - | -   | - |
| FAM133A    | 1 | 0 | - | -   | -   | - | - | -   | - |
| FAM135A    | 1 | 1 | 1 | -   | -   | - | - | -   | - |
| FAM136A    | 1 | 0 | - | -   | -   | - | - | -   | - |
| FAM13A     | 1 | 3 | - | -   | -   | - | - | -   | - |
| FAM149B1   | 1 | 1 | - | -   | -   | - | - | -   | - |
| FAM151B    | 1 | 1 | - | -   | -   | - | - | -   | - |
| FAM159A    | 1 | 1 | - | -   | -   | - | - | -   | - |
| FAM166A    | 1 | 3 | - | -   | -   | - | - | -   | - |
| FAM170B    | 1 | 1 | - | -   | -   | - | - | -   | - |
| FAM174A    | 1 | 1 | - | -   | -   | - | - | -   | - |
| FAM179A    | 1 | 0 | - | -   | -   | - | - | -   | - |
| FAM181A    | 1 | 0 | - | -   | -   | - | - | -   | - |
| FAM184A    | 1 | 1 | - | -   | -   | - | - | -   | - |
| FAM189A1   | 1 | 1 | - | -   | -   | - | - | -   | - |
| FAM189B    | 1 | 1 | - | -   | -   | - | - | -   | - |

|          |   |   |   |   |     |   |   |   |     |
|----------|---|---|---|---|-----|---|---|---|-----|
| FAM192A  | 1 | 0 | - | - | -   | - | - | - | -   |
| FAM193B  | 1 | 0 | - | - | -   | - | - | - | -   |
| ERICH6   | 1 | 2 | - | - | -   | - | - | - | -   |
| FAM198B  | 1 | 0 | - | - | -   | - | - | - | -   |
| FAM200A  | 1 | 2 | - | - | -   | - | - | - | -   |
| FAM205A  | 1 | 1 | - | - | -   | - | - | - | -   |
| FAM206A  | 1 | 1 | - | - | -   | - | - | - | -   |
| FAM20C   | 1 | 0 | - | - | -   | - | - | - | -   |
| FAM212B  | 1 | 2 | - | - | -   | - | - | - | -   |
| FAM213B  | 1 | 0 | - | - | -   | - | - | - | -   |
| FAM214A  | 1 | 0 | - | - | -   | - | - | - | -   |
| FAM218A  | 1 | 0 | - | - | -   | - | - | - | -   |
| FAM21A   | 1 | 0 | - | - | -   | - | - | - | -   |
| FAM227B  | 1 | 3 | - | - | -   | - | - | - | -   |
| FAM26E   | 1 | 0 | - | - | -   | - | - | - | -   |
| FAM3B    | 1 | 1 | - | - | -   | - | - | - | -   |
| FAM47A   | 1 | 1 | - | - | -   | - | - | - | -   |
| FAM63A   | 1 | 4 | - | - | -   | - | - | - | -   |
| FAM64A   | 1 | 0 | - | - | -   | - | - | - | -   |
| FAM65B   | 1 | 1 | - | - | -   | - | - | - | -   |
| FAM71B   | 1 | 0 | - | - | -   | - | - | - | -   |
| FAM71C   | 1 | 2 | - | - | -   | - | - | - | -   |
| FAM71E1  | 1 | 0 | - | - | -   | - | - | - | -   |
| FAM71F1  | 1 | 2 | - | - | -   | - | - | - | -   |
| FAM71F2  | 1 | 0 | - | - | -   | - | - | - | -   |
| FAM73B   | 1 | 0 | - | - | -   | - | - | - | -   |
| FAM83D   | 1 | 1 | - | - | -   | - | - | - | -   |
| FAM89A   | 1 | 0 | - | - | -   | - | - | - | -   |
| FAM9B    | 1 | 0 | - | - | -   | - | - | - | -   |
| FANCD2   | 1 | 0 | - | - | Yes | - | - | - | Yes |
| FANCD2OS | 1 | 0 | - | - | -   | - | - | - | -   |
| FANCI    | 1 | 2 | - | - | Yes | - | - | - | Yes |
| FANK1    | 1 | 1 | - | - | -   | - | - | - | -   |
| FAP      | 1 | 1 | - | - | -   | - | - | - | -   |
| FASTKD1  | 1 | 1 | - | - | -   | - | - | - | -   |
| FASTKD3  | 1 | 2 | - | - | -   | - | - | - | -   |
| FAT1     | 1 | 6 | 1 | - | -   | - | - | - | -   |
| FBLIM1   | 1 | 0 | - | - | -   | - | - | - | -   |
| FBLN1    | 1 | 0 | 1 | - | -   | - | - | - | -   |
| FBLN2    | 1 | 1 | - | - | -   | - | - | - | -   |
| FBXL13   | 1 | 2 | 1 | - | -   | - | - | - | -   |
| FBXL14   | 1 | 0 | - | - | -   | - | - | - | -   |
| FBXL15   | 1 | 0 | - | - | -   | - | - | - | -   |
| FBXL18   | 1 | 0 | - | - | -   | - | - | - | -   |
| FBXL6    | 1 | 1 | - | - | -   | - | - | - | -   |
| FBXO16   | 1 | 2 | - | - | -   | - | - | - | -   |
| FBXO21   | 1 | 0 | 1 | - | -   | - | - | - | -   |
| FBXO22   | 1 | 0 | - | - | -   | - | - | - | -   |
| FBXO24   | 1 | 2 | - | - | -   | - | - | - | -   |
| FBXO38   | 1 | 1 | - | - | -   | - | - | - | -   |
| FBXO7    | 1 | 2 | - | - | -   | - | - | - | -   |
| FBXW8    | 1 | 0 | - | - | -   | - | - | - | -   |
| FCAMR    | 1 | 0 | - | - | -   | - | - | - | -   |
| FCER1A   | 1 | 0 | - | - | -   | - | - | - | -   |
| FCGBP    | 1 | 3 | - | - | -   | - | - | - | -   |
| FCN2     | 1 | 1 | - | - | -   | - | - | - | -   |
| FCN3     | 1 | 1 | - | - | -   | - | - | - | -   |
| FCRL1    | 1 | 1 | - | - | -   | - | - | - | -   |
| FCRL2    | 1 | 0 | - | - | -   | - | - | - | -   |
| FCRL3    | 1 | 2 | - | - | -   | - | - | - | -   |
| FDXR     | 1 | 0 | - | - | -   | - | - | - | -   |
| FER1L5   | 1 | 0 | - | - | -   | - | - | - | -   |
| FERMT1   | 1 | 0 | - | - | -   | - | - | - | -   |
| FFAR1    | 1 | 0 | 1 | - | -   | - | - | - | -   |
| FG4      | 1 | 4 | - | - | -   | - | - | - | -   |
| FGD2     | 1 | 1 | - | - | -   | - | - | - | -   |
| FGD4     | 1 | 0 | - | - | -   | - | - | - | -   |
| FGF12    | 1 | 0 | - | - | -   | - | - | - | -   |
| FGF22    | 1 | 0 | - | - | -   | - | - | - | -   |
| FGFBP1   | 1 | 1 | - | - | -   | - | - | - | -   |
| FGFBP2   | 1 | 0 | - | - | -   | - | - | - | -   |
| FGFR1    | 1 | 1 | - | - | -   | - | - | - | -   |
| FGFR4    | 1 | 1 | - | - | -   | - | - | - | -   |
| FGGY     | 1 | 2 | - | - | -   | - | - | - | -   |
| FHAD1    | 1 | 1 | - | - | -   | - | - | - | -   |
| FIBIN    | 1 | 0 | - | - | -   | - | - | - | -   |
| FIBP     | 1 | 0 | - | - | -   | - | - | - | -   |
| FIG4     | 1 | 1 | - | - | -   | - | - | - | -   |
| FIGN     | 1 | 0 | - | - | -   | - | - | - | -   |
| FIGNL1   | 1 | 0 | - | - | -   | - | - | - | -   |
| FIP1L1   | 1 | 0 | - | - | -   | - | - | - | -   |
| FITM1    | 1 | 0 | - | - | -   | - | - | - | -   |
| FKBP11   | 1 | 2 | - | - | -   | - | - | - | -   |
| FKBP14   | 1 | 1 | - | - | -   | - | - | - | -   |
| FKBP7    | 1 | 0 | - | - | -   | - | - | - | -   |
| FKRP     | 1 | 0 | 1 | - | -   | - | - | - | -   |
| FKN      | 1 | 0 | - | - | -   | - | - | - | -   |
| FLCN     | 1 | 1 | 1 | - | -   | - | - | - | Yes |
| FLII     | 1 | 3 | - | - | -   | - | - | - | -   |
| FLJ44313 | 1 | 0 | - | - | -   | - | - | - | -   |
| FLNA     | 1 | 0 | - | - | -   | - | - | - | -   |
| FLYWCH1  | 1 | 1 | - | - | -   | - | - | - | -   |
| FLYWCH2  | 1 | 0 | - | - | -   | - | - | - | -   |
| FMNL3    | 1 | 0 | - | - | -   | - | - | - | -   |
| FMO2     | 1 | 3 | - | - | -   | - | - | - | -   |
| FMO3     | 1 | 1 | 1 | - | -   | - | - | - | -   |
| FNDC3A   | 1 | 0 | - | - | -   | - | - | - | -   |
| FNDC7    | 1 | 0 | - | - | -   | - | - | - | -   |
| FOCAD    | 1 | 1 | - | - | -   | - | - | - | -   |
| FOXB2    | 1 | 0 | 1 | - | -   | - | - | - | -   |
| FOXH1    | 1 | 2 | - | - | -   | - | - | - | -   |
| FOXP2    | 1 | 0 | - | - | -   | - | - | - | -   |
| FOXP1    | 1 | 0 | - | - | -   | - | - | - | -   |
| FOXPRED2 | 1 | 0 | - | - | -   | - | - | - | -   |
| FPGS     | 1 | 0 | - | - | -   | - | - | - | -   |
| FREM2    | 1 | 1 | - | - | -   | - | - | - | -   |

|               |   |   |   |     |   |   |   |   |
|---------------|---|---|---|-----|---|---|---|---|
| FRK           | 1 | 0 | - | -   | - | - | - | - |
| FRYL          | 1 | 0 | - | -   | - | - | - | - |
| FSCB          | 1 | 1 | - | -   | - | - | - | - |
| FSCN2         | 1 | 0 | - | -   | - | - | - | - |
| FSCN3         | 1 | 1 | - | -   | - | - | - | - |
| FSIP1         | 1 | 3 | - | -   | - | - | - | - |
| FUBP3         | 1 | 0 | - | -   | - | - | - | - |
| FUCA1         | 1 | 0 | - | -   | - | - | - | - |
| FUCA2         | 1 | 0 | - | -   | - | - | - | - |
| FUK           | 1 | 2 | - | -   | - | - | - | - |
| FUOM          | 1 | 0 | - | -   | - | - | - | - |
| FUT1          | 1 | 0 | - | -   | - | - | - | - |
| FUT10         | 1 | 1 | - | -   | - | - | - | - |
| FUT2          | 1 | 1 | - | -   | - | - | - | - |
| FXYD3         | 1 | 0 | - | -   | - | - | - | - |
| FXYD5         | 1 | 0 | - | -   | - | - | - | - |
| FYN           | 1 | 0 | - | -   | - | - | - | - |
| G6PC2         | 1 | 2 | - | -   | - | - | - | - |
| GABRA6        | 1 | 1 | 1 | -   | - | - | - | - |
| GABRD         | 1 | 1 | - | -   | - | - | - | - |
| GABRR3        | 1 | 1 | - | -   | - | - | - | - |
| GAL3ST2       | 1 | 0 | - | -   | - | - | - | - |
| GALNT3        | 1 | 0 | - | -   | - | - | - | - |
| GALNT7        | 1 | 1 | - | -   | - | - | - | - |
| GALNTL5       | 1 | 0 | - | -   | - | - | - | - |
| GALP          | 1 | 0 | - | -   | - | - | - | - |
| GARNL3        | 1 | 0 | - | -   | - | - | - | - |
| GAST          | 1 | 0 | - | -   | - | - | - | - |
| GATC          | 1 | 0 | - | -   | - | - | - | - |
| GBA2          | 1 | 0 | - | -   | - | - | - | - |
| GBP1          | 1 | 2 | - | -   | - | - | - | - |
| GBP3          | 1 | 0 | - | -   | - | - | - | - |
| GBP7          | 1 | 1 | - | -   | - | - | - | - |
| GCC2          | 1 | 3 | - | -   | - | - | - | - |
| GCDH          | 1 | 1 | - | -   | - | - | - | - |
| GCGR          | 1 | 0 | - | -   | - | - | - | - |
| GCKR          | 1 | 3 | - | -   | - | - | - | - |
| GCNT1         | 1 | 0 | - | -   | - | - | - | - |
| GCOM1         | 1 | 1 | - | -   | - | - | - | - |
| GDAP2         | 1 | 0 | - | -   | - | - | - | - |
| GDE1          | 1 | 0 | - | -   | - | - | - | - |
| GDF1          | 1 | 0 | - | -   | - | - | - | - |
| GDF3          | 1 | 0 | - | -   | - | - | - | - |
| GD12          | 1 | 0 | - | -   | - | - | - | - |
| GDPD3         | 1 | 0 | - | -   | - | - | - | - |
| GEMIN5        | 1 | 1 | 1 | -   | - | - | - | - |
| GEN1          | 1 | 2 | - | Yes | - | - | - | - |
| GF11B         | 1 | 0 | - | -   | - | - | - | - |
| GFFT2         | 1 | 2 | - | -   | - | - | - | - |
| GFRA1         | 1 | 0 | - | -   | - | - | - | - |
| GFRAL         | 1 | 0 | - | -   | - | - | - | - |
| GGA CT        | 1 | 0 | - | -   | - | - | - | - |
| GGCT          | 1 | 0 | - | -   | - | - | - | - |
| GGT6          | 1 | 0 | - | -   | - | - | - | - |
| GHRHR         | 1 | 1 | - | -   | - | - | - | - |
| GHRL          | 1 | 0 | - | -   | - | - | - | - |
| GIMAP1-GIMAP5 | 1 | 0 | - | -   | - | - | - | - |
| GIMAP7        | 1 | 0 | - | -   | - | - | - | - |
| GIMD1         | 1 | 0 | - | -   | - | - | - | - |
| GINS2         | 1 | 0 | - | -   | - | - | - | - |
| GINS3         | 1 | 0 | - | -   | - | - | - | - |
| GINS4         | 1 | 0 | - | -   | - | - | - | - |
| GIPC2         | 1 | 2 | - | -   | - | - | - | - |
| GIPC3         | 1 | 0 | - | -   | - | - | - | - |
| GJB4          | 1 | 0 | - | -   | - | - | - | - |
| GJB7          | 1 | 1 | - | -   | - | - | - | - |
| GJD4          | 1 | 2 | - | -   | - | - | - | - |
| GK2           | 1 | 1 | - | -   | - | - | - | - |
| GLB1L         | 1 | 0 | - | -   | - | - | - | - |
| GLDC          | 1 | 1 | - | -   | - | - | - | - |
| GLDN          | 1 | 1 | - | -   | - | - | - | - |
| GLI4          | 1 | 1 | - | -   | - | - | - | - |
| GLI PR2       | 1 | 1 | - | -   | - | - | - | - |
| GLRX2         | 1 | 1 | - | -   | - | - | - | - |
| GLS2          | 1 | 1 | - | -   | - | - | - | - |
| GLT8D2        | 1 | 1 | - | -   | - | - | - | - |
| GLTPD2        | 1 | 0 | - | -   | - | - | - | - |
| GLYAT         | 1 | 0 | - | -   | - | - | - | - |
| GMFG          | 1 | 0 | - | -   | - | - | - | - |
| GMIP          | 1 | 0 | 1 | -   | - | - | - | - |
| GMPR2         | 1 | 0 | - | -   | - | - | - | - |
| GNA15         | 1 | 0 | - | -   | - | - | - | - |
| GNAT2         | 1 | 1 | - | -   | - | - | - | - |
| GNB5          | 1 | 0 | - | -   | - | - | - | - |
| GNE           | 1 | 0 | - | -   | - | - | - | - |
| GOLGA1        | 1 | 0 | - | -   | - | - | - | - |
| GOLGA7B       | 1 | 0 | - | -   | - | - | - | - |
| GON4L         | 1 | 0 | - | -   | - | - | - | - |
| GORAB         | 1 | 0 | - | -   | - | - | - | - |
| GOSR2         | 1 | 0 | - | -   | - | - | - | - |
| GOTIL1        | 1 | 0 | - | -   | - | - | - | - |
| GP2           | 1 | 0 | - | -   | - | - | - | - |
| GP5           | 1 | 0 | - | -   | - | - | - | - |
| GP6           | 1 | 2 | - | -   | - | - | - | - |
| GPAM          | 1 | 0 | - | -   | - | - | - | - |
| GPATCH2       | 1 | 0 | - | -   | - | - | - | - |
| GPATCH2L      | 1 | 0 | - | -   | - | - | - | - |
| GPC2          | 1 | 0 | - | -   | - | - | - | - |
| GPD2          | 1 | 0 | - | -   | - | - | - | - |
| GPER1         | 1 | 0 | - | -   | - | - | - | - |
| GPLD1         | 1 | 1 | - | -   | - | - | - | - |
| GPR1          | 1 | 1 | - | -   | - | - | - | - |
| ADGRF1        | 1 | 1 | - | -   | - | - | - | - |
| ADGRA1        | 1 | 0 | - | -   | - | - | - | - |
| ADGRA2        | 1 | 0 | - | -   | - | - | - | - |
| GPR135        | 1 | 0 | - | -   | - | - | - | - |

|           |   |   |   |   |     |   |   |   |   |
|-----------|---|---|---|---|-----|---|---|---|---|
| GPR137    | 1 | 1 | - | - | -   | - | - | - | - |
| GPR137B   | 1 | 0 | - | - | -   | - | - | - | - |
| GPR146    | 1 | 0 | - | - | -   | - | - | - | - |
| GPR149    | 1 | 3 | - | - | -   | - | - | - | - |
| GPR150    | 1 | 1 | - | - | -   | - | - | - | - |
| GPR151    | 1 | 1 | - | - | -   | - | - | - | - |
| GPR156    | 1 | 3 | 1 | - | -   | - | - | - | - |
| GPR158    | 1 | 0 | - | - | -   | - | - | - | - |
| GPR17     | 1 | 2 | - | - | -   | - | - | - | - |
| GPR171    | 1 | 0 | - | - | -   | - | - | - | - |
| GPR18     | 1 | 0 | - | - | -   | - | - | - | - |
| GPR31     | 1 | 1 | - | - | -   | - | - | - | - |
| GPR39     | 1 | 2 | 1 | - | -   | - | - | - | - |
| GPR68     | 1 | 0 | - | - | -   | - | - | - | - |
| GPR78     | 1 | 0 | - | - | -   | - | - | - | - |
| GPR84     | 1 | 2 | - | - | -   | - | - | - | - |
| GPR88     | 1 | 0 | - | - | -   | - | - | - | - |
| GPRASP1   | 1 | 0 | - | - | -   | - | - | - | - |
| GPRCSC    | 1 | 0 | - | - | -   | - | - | - | - |
| GPXI      | 1 | 0 | - | - | -   | - | - | - | - |
| GPX6      | 1 | 0 | - | - | -   | - | - | - | - |
| GRAMD3    | 1 | 3 | - | - | -   | - | - | - | - |
| GREB1     | 1 | 0 | - | - | -   | - | - | - | - |
| GRHPR     | 1 | 0 | - | - | -   | - | - | - | - |
| GRIK1     | 1 | 1 | - | - | -   | - | - | - | - |
| GRIK5     | 1 | 0 | - | - | -   | - | - | - | - |
| GRINA     | 1 | 0 | - | - | -   | - | - | - | - |
| GRK1      | 1 | 0 | 1 | - | -   | - | - | - | - |
| GRK7      | 1 | 3 | 1 | - | -   | - | - | - | - |
| GRM4      | 1 | 0 | - | - | -   | - | - | - | - |
| GRM6      | 1 | 2 | - | - | -   | - | - | - | - |
| GRSF1     | 1 | 1 | - | - | -   | - | - | - | - |
| GSAP      | 1 | 1 | - | - | -   | - | - | - | - |
| GSCC      | 1 | 1 | - | - | -   | - | - | - | - |
| GSDMC     | 1 | 1 | - | - | -   | - | - | - | - |
| GSG2      | 1 | 0 | - | - | -   | - | - | - | - |
| GSR       | 1 | 0 | - | - | -   | - | - | - | - |
| GSTA3     | 1 | 1 | - | - | -   | - | - | - | - |
| GSTCD     | 1 | 0 | - | - | Yes | - | - | - | - |
| GSTM3     | 1 | 0 | - | - | -   | - | - | - | - |
| GSTM5     | 1 | 1 | - | - | -   | - | - | - | - |
| GTDC1     | 1 | 0 | - | - | -   | - | - | - | - |
| GTF2A2    | 1 | 0 | - | - | -   | - | - | - | - |
| GTF2F1    | 1 | 1 | - | - | -   | - | - | - | - |
| GTF3A     | 1 | 1 | - | - | -   | - | - | - | - |
| GTF3C5    | 1 | 0 | - | - | -   | - | - | - | - |
| MTG2      | 1 | 1 | - | - | -   | - | - | - | - |
| GUCA1B    | 1 | 0 | - | - | -   | - | - | - | - |
| GUCA1C    | 1 | 0 | - | - | -   | - | - | - | - |
| GUF1      | 1 | 2 | - | - | -   | - | - | - | - |
| GXYLT1    | 1 | 0 | - | - | -   | - | - | - | - |
| GZMA      | 1 | 3 | - | - | -   | - | - | - | - |
| H6PD      | 1 | 1 | - | - | -   | - | - | - | - |
| HACE1     | 1 | 0 | - | - | -   | - | - | - | - |
| HAGH      | 1 | 0 | - | - | -   | - | - | - | - |
| HAGHL     | 1 | 0 | - | - | -   | - | - | - | - |
| HAL       | 1 | 4 | - | - | -   | - | - | - | - |
| HAO1      | 1 | 1 | - | - | -   | - | - | - | - |
| HAP1      | 1 | 0 | - | - | -   | - | - | - | - |
| HAPLN2    | 1 | 1 | - | - | -   | - | - | - | - |
| HAPLN4    | 1 | 0 | - | - | -   | - | - | - | - |
| HARS      | 1 | 0 | - | - | -   | - | - | - | - |
| HAUS4     | 1 | 0 | - | - | -   | - | - | - | - |
| HAUS6     | 1 | 1 | - | - | -   | - | - | - | - |
| HAX1      | 1 | 0 | - | - | -   | - | - | - | - |
| HBE1      | 1 | 0 | - | - | -   | - | - | - | - |
| HBS1L     | 1 | 0 | - | - | -   | - | - | - | - |
| HDAC4     | 1 | 0 | - | - | -   | - | - | - | - |
| HDC       | 1 | 0 | - | - | -   | - | - | - | - |
| HDDC3     | 1 | 0 | - | - | -   | - | - | - | - |
| HDHD2     | 1 | 0 | - | - | -   | - | - | - | - |
| HEATR5A   | 1 | 1 | - | - | -   | - | - | - | - |
| HEATR5B   | 1 | 3 | - | - | -   | - | - | - | - |
| HECW2     | 1 | 0 | - | - | -   | - | - | - | - |
| HELZ2     | 1 | 1 | - | - | -   | - | - | - | - |
| HEPHL1    | 1 | 5 | - | - | -   | - | - | - | - |
| HEFN1     | 1 | 0 | 1 | - | -   | - | - | - | - |
| HERC1     | 1 | 3 | 1 | - | -   | - | - | - | - |
| HERC6     | 1 | 2 | - | - | -   | - | - | - | - |
| HERPUD1   | 1 | 0 | - | - | -   | - | - | - | - |
| HEXA      | 1 | 4 | - | - | -   | - | - | - | - |
| HEXB      | 1 | 2 | - | - | -   | - | - | - | - |
| HEXDC     | 1 | 0 | - | - | -   | - | - | - | - |
| HFM1      | 1 | 1 | 1 | - | -   | - | - | - | - |
| HGSNAT    | 1 | 0 | - | - | -   | - | - | - | - |
| HHATL     | 1 | 1 | - | - | -   | - | - | - | - |
| HHIPL2    | 1 | 0 | - | - | -   | - | - | - | - |
| HHLA1     | 1 | 0 | - | - | -   | - | - | - | - |
| HIF3A     | 1 | 1 | - | - | -   | - | - | - | - |
| HIPK3     | 1 | 0 | - | - | -   | - | - | - | - |
| HIPK4     | 1 | 0 | - | - | -   | - | - | - | - |
| HIST1H2AA | 1 | 0 | - | - | -   | - | - | - | - |
| HIST1H2AB | 1 | 0 | - | - | -   | - | - | - | - |
| HIST1H2AJ | 1 | 0 | - | - | -   | - | - | - | - |
| HIST1H2AK | 1 | 0 | - | - | -   | - | - | - | - |
| HIST1H2BE | 1 | 0 | - | - | -   | - | - | - | - |
| HIST1H2BH | 1 | 0 | - | - | -   | - | - | - | - |
| HIST1H3A  | 1 | 2 | - | - | -   | - | - | - | - |
| HIST1H3E  | 1 | 0 | - | - | -   | - | - | - | - |
| HIST1H3H  | 1 | 0 | - | - | -   | - | - | - | - |
| HIST1H4E  | 1 | 5 | - | - | -   | - | - | - | - |
| HIST1H4H  | 1 | 0 | - | - | -   | - | - | - | - |
| HIST2H2AC | 1 | 0 | - | - | -   | - | - | - | - |
| HIST3H2A  | 1 | 0 | - | - | -   | - | - | - | - |
| HIVEP3    | 1 | 1 | 1 | - | -   | - | - | - | - |
| HKDC1     | 1 | 1 | - | - | -   | - | - | - | - |

|          |   |   |   |   |   |     |   |   |   |   |
|----------|---|---|---|---|---|-----|---|---|---|---|
| HKR1     | 1 | 2 | - | - | - | -   | - | - | - | - |
| HLC5     | 1 | 1 | - | - | - | -   | - | - | - | - |
| HLCF     | 1 | 2 | - | - | - | -   | - | - | - | - |
| HMCN1    | 1 | 1 | 1 | - | - | -   | - | - | - | - |
| HMGCS2   | 1 | 0 | - | - | - | -   | - | - | - | - |
| HMHA1    | 1 | 0 | - | - | - | -   | - | - | - | - |
| HMOX2    | 1 | 0 | - | - | - | -   | - | - | - | - |
| HNF4A    | 1 | 1 | - | - | - | -   | - | - | - | - |
| HNF4G    | 1 | 0 | - | - | - | -   | - | - | - | - |
| HNMT     | 1 | 0 | - | - | - | -   | - | - | - | - |
| HNRNP1   | 1 | 0 | - | - | - | -   | - | - | - | - |
| HNRNPUL1 | 1 | 0 | - | - | - | -   | - | - | - | - |
| HOXB2    | 1 | 0 | - | - | - | -   | - | - | - | - |
| HOXB3    | 1 | 0 | - | - | - | -   | - | - | - | - |
| HOXD1    | 1 | 0 | - | - | - | -   | - | - | - | - |
| HOXD11   | 1 | 0 | - | - | - | -   | - | - | - | - |
| HOXD8    | 1 | 0 | - | - | - | -   | - | - | - | - |
| HP1BP3   | 1 | 0 | - | - | - | -   | - | - | - | - |
| HPRT1    | 1 | 0 | - | - | - | -   | - | - | - | - |
| HPSE2    | 1 | 2 | - | - | - | -   | - | - | - | - |
| HRASLS5  | 1 | 1 | - | - | - | -   | - | - | - | - |
| HS3ST3A1 | 1 | 0 | - | - | - | -   | - | - | - | - |
| HS6ST2   | 1 | 0 | - | - | - | -   | - | - | - | - |
| HSD11B1L | 1 | 0 | - | - | - | -   | - | - | - | - |
| HSD17B11 | 1 | 0 | - | - | - | -   | - | - | - | - |
| HSD17B2  | 1 | 0 | 1 | - | - | -   | - | - | - | - |
| HSD17B3  | 1 | 0 | 1 | - | - | -   | - | - | - | - |
| HSD17B4  | 1 | 0 | - | - | - | -   | - | - | - | - |
| HSP90B1  | 1 | 0 | - | - | - | -   | - | - | - | - |
| HSPA6    | 1 | 1 | 1 | - | - | -   | - | - | - | - |
| HSPBP1   | 1 | 1 | - | - | - | -   | - | - | - | - |
| HSPG2    | 1 | 1 | 1 | - | - | -   | - | - | - | - |
| HTR3D    | 1 | 0 | - | - | - | -   | - | - | - | - |
| HYAL3    | 1 | 0 | - | - | - | -   | - | - | - | - |
| HYI      | 1 | 0 | - | - | - | -   | - | - | - | - |
| HYLS1    | 1 | 0 | - | - | - | -   | - | - | - | - |
| LARS     | 1 | 2 | 1 | - | - | -   | - | - | - | - |
| ICA1L    | 1 | 2 | - | - | - | -   | - | - | - | - |
| ICAM2    | 1 | 0 | - | - | - | -   | - | - | - | - |
| ICAM3    | 1 | 0 | - | - | - | -   | - | - | - | - |
| IDH3G    | 1 | 0 | - | - | - | -   | - | - | - | - |
| IDO2     | 1 | 2 | - | - | - | -   | - | - | - | - |
| IFI16    | 1 | 0 | - | - | - | Yes | - | - | - | - |
| IFI27    | 1 | 1 | - | - | - | -   | - | - | - | - |
| IFI27L1  | 1 | 0 | - | - | - | -   | - | - | - | - |
| IFI27L2  | 1 | 1 | - | - | - | -   | - | - | - | - |
| IFI30    | 1 | 0 | - | - | - | -   | - | - | - | - |
| IFI35    | 1 | 1 | - | - | - | -   | - | - | - | - |
| IFI44    | 1 | 0 | - | - | - | -   | - | - | - | - |
| IFITM10  | 1 | 0 | - | - | - | -   | - | - | - | - |
| LMNTD1   | 1 | 1 | - | - | - | -   | - | - | - | - |
| IFNL2    | 1 | 0 | - | - | - | -   | - | - | - | - |
| IFNLR1   | 1 | 0 | - | - | - | -   | - | - | - | - |
| IFT122   | 1 | 1 | - | - | - | -   | - | - | - | - |
| IFT172   | 1 | 1 | - | - | - | -   | - | - | - | - |
| IFT43    | 1 | 1 | - | - | - | -   | - | - | - | - |
| IGDCC4   | 1 | 1 | - | - | - | -   | - | - | - | - |
| IGF1     | 1 | 0 | - | - | - | Yes | - | - | - | - |
| IGF2     | 1 | 1 | - | - | - | -   | - | - | - | - |
| IGFALS   | 1 | 0 | - | - | - | -   | - | - | - | - |
| IGFBP2   | 1 | 0 | - | - | - | -   | - | - | - | - |
| IGFBP4   | 1 | 0 | - | - | - | -   | - | - | - | - |
| IGFLR1   | 1 | 2 | - | - | - | -   | - | - | - | - |
| IGHMBP2  | 1 | 1 | - | - | - | Yes | - | - | - | - |
| IGLL5    | 1 | 1 | - | - | - | -   | - | - | - | - |
| IK       | 1 | 1 | - | - | - | -   | - | - | - | - |
| IL11RA   | 1 | 0 | - | - | - | -   | - | - | - | - |
| IL13     | 1 | 0 | - | - | - | -   | - | - | - | - |
| IL15RA   | 1 | 1 | - | - | - | -   | - | - | - | - |
| IL16     | 1 | 1 | - | - | - | -   | - | - | - | - |
| IL17B    | 1 | 0 | 1 | - | - | -   | - | - | - | - |
| IL1R2    | 1 | 2 | - | - | - | -   | - | - | - | - |
| IL20     | 1 | 1 | - | - | - | -   | - | - | - | - |
| IL23R    | 1 | 1 | - | - | - | -   | - | - | - | - |
| IL27     | 1 | 0 | - | - | - | -   | - | - | - | - |
| IL27RA   | 1 | 0 | - | - | - | -   | - | - | - | - |
| IL31RA   | 1 | 1 | - | - | - | -   | - | - | - | - |
| IL36B    | 1 | 2 | - | - | - | -   | - | - | - | - |
| IL36G    | 1 | 0 | - | - | - | -   | - | - | - | - |
| IL37     | 1 | 2 | - | - | - | -   | - | - | - | - |
| IL3RA    | 1 | 0 | - | - | - | -   | - | - | - | - |
| IL4R     | 1 | 0 | - | - | - | -   | - | - | - | - |
| IL5RA    | 1 | 0 | - | - | - | -   | - | - | - | - |
| CXCL8    | 1 | 0 | - | - | - | -   | - | - | - | - |
| ILVBL    | 1 | 1 | - | - | - | -   | - | - | - | - |
| IMPACT   | 1 | 0 | - | - | - | -   | - | - | - | - |
| IMPACT   | 1 | 0 | - | - | - | -   | - | - | - | - |
| IMPACT   | 1 | 3 | - | - | - | -   | - | - | - | - |
| INADL    | 1 | 1 | - | - | - | -   | - | - | - | - |
| INCENP   | 1 | 2 | - | - | - | -   | - | - | - | - |
| INF2     | 1 | 1 | - | - | - | -   | - | - | - | - |
| ING1     | 1 | 1 | - | - | - | -   | - | - | - | - |
| ING4     | 1 | 0 | - | - | - | -   | - | - | - | - |
| INHBC    | 1 | 1 | - | - | - | -   | - | - | - | - |
| INO80E   | 1 | 0 | - | - | - | -   | - | - | - | - |
| INPP4A   | 1 | 0 | - | - | - | -   | - | - | - | - |
| INPP5D   | 1 | 0 | - | - | - | -   | - | - | - | - |
| INPP5E   | 1 | 0 | - | - | - | -   | - | - | - | - |
| INSM2    | 1 | 0 | - | - | - | -   | - | - | - | - |
| INTS9    | 1 | 0 | - | - | - | -   | - | - | - | - |
| INTU     | 1 | 0 | - | - | - | -   | - | - | - | - |
| INVS     | 1 | 0 | - | - | - | -   | - | - | - | - |
| IP6K3    | 1 | 1 | - | - | - | -   | - | - | - | - |
| IPO4     | 1 | 2 | - | - | - | -   | - | - | - | - |
| IPO9     | 1 | 0 | - | - | - | -   | - | - | - | - |
| IQCF1    | 1 | 0 | - | - | - | -   | - | - | - | - |



|               |   |   |   |   |   |   |   |   |   |
|---------------|---|---|---|---|---|---|---|---|---|
| IQCG          | 1 | 1 | - | - | - | - | - | - | - |
| IQGAP1        | 1 | 0 | - | - | - | - | - | - | - |
| IRAK3         | 1 | 3 | - | - | - | - | - | - | - |
| IRF7          | 1 | 1 | - | - | - | - | - | - | - |
| IRGQ          | 1 | 1 | - | - | - | - | - | - | - |
| IRX4          | 1 | 0 | - | - | - | - | - | - | - |
| IRX6          | 1 | 0 | 1 | - | - | - | - | - | - |
| ISLR          | 1 | 0 | 1 | - | - | - | - | - | - |
| ISLR2         | 1 | 0 | - | - | - | - | - | - | - |
| ISOC2         | 1 | 0 | - | - | - | - | - | - | - |
| ITGA10        | 1 | 0 | - | - | - | - | - | - | - |
| ITGA5         | 1 | 0 | - | - | - | - | - | - | - |
| ITGA7         | 1 | 0 | 1 | - | - | - | - | - | - |
| ITGA8         | 1 | 1 | - | - | - | - | - | - | - |
| ITGB1         | 1 | 0 | - | - | - | - | - | - | - |
| ITGB1BP1      | 1 | 0 | - | - | - | - | - | - | - |
| ITGB4         | 1 | 1 | - | - | - | - | - | - | - |
| ITIH1         | 1 | 1 | - | - | - | - | - | - | - |
| ITIH3         | 1 | 0 | - | - | - | - | - | - | - |
| ITIH6         | 1 | 0 | - | - | - | - | - | - | - |
| ITLN1         | 1 | 1 | - | - | - | - | - | - | - |
| ITPKC         | 1 | 0 | - | - | - | - | - | - | - |
| ITPR2         | 1 | 0 | - | - | - | - | - | - | - |
| ITPRIP        | 1 | 0 | - | - | - | - | - | - | - |
| ITPRIP1       | 1 | 0 | - | - | - | - | - | - | - |
| ITSN2         | 1 | 1 | - | - | - | - | - | - | - |
| IWS1          | 1 | 0 | - | - | - | - | - | - | - |
| JAGN1         | 1 | 0 | - | - | - | - | - | - | - |
| JMJD7-PLA2G4B | 1 | 1 | - | - | - | - | - | - | - |
| KANK1         | 1 | 0 | - | - | - | - | - | - | - |
| KANK3         | 1 | 0 | - | - | - | - | - | - | - |
| KANK4         | 1 | 0 | - | - | - | - | - | - | - |
| KATNAL2       | 1 | 0 | - | - | - | - | - | - | - |
| KCNA7         | 1 | 0 | 1 | - | - | - | - | - | - |
| KCNE2         | 1 | 0 | - | - | - | - | - | - | - |
| KCNE4         | 1 | 0 | - | - | - | - | - | - | - |
| KCNH5         | 1 | 0 | - | - | - | - | - | - | - |
| KCNIP3        | 1 | 0 | - | - | - | - | - | - | - |
| KCNJ14        | 1 | 1 | - | - | - | - | - | - | - |
| KCNJ16        | 1 | 0 | - | - | - | - | - | - | - |
| KCNJ18        | 1 | 1 | - | - | - | - | - | - | - |
| KCNK1         | 1 | 1 | - | - | - | - | - | - | - |
| KCNK12        | 1 | 0 | - | - | - | - | - | - | - |
| KCNK15        | 1 | 0 | 1 | - | - | - | - | - | - |
| KCNK7         | 1 | 0 | - | - | - | - | - | - | - |
| KCNMB3        | 1 | 1 | 1 | - | - | - | - | - | - |
| KCNN4         | 1 | 0 | - | - | - | - | - | - | - |
| KCNQ1         | 1 | 0 | - | - | - | - | - | - | - |
| KCNT1         | 1 | 0 | - | - | - | - | - | - | - |
| KDM2B         | 1 | 0 | - | - | - | - | - | - | - |
| KDM4A         | 1 | 1 | - | - | - | - | - | - | - |
| KDM4D         | 1 | 0 | - | - | - | - | - | - | - |
| KDR           | 1 | 0 | - | - | - | - | - | - | - |
| KDSR          | 1 | 0 | - | - | - | - | - | - | - |
| KHDRBS2       | 1 | 1 | - | - | - | - | - | - | - |
| KIAA0020      | 1 | 2 | - | - | - | - | - | - | - |
| SPDR          | 1 | 0 | - | - | - | - | - | - | - |
| KIAA0195      | 1 | 1 | - | - | - | - | - | - | - |
| KIAA0319      | 1 | 2 | - | - | - | - | - | - | - |
| KIAA0319L     | 1 | 0 | - | - | - | - | - | - | - |
| KIAA0368      | 1 | 2 | - | - | - | - | - | - | - |
| KIAA0825      | 1 | 2 | - | - | - | - | - | - | - |
| KIAA1107      | 1 | 0 | - | - | - | - | - | - | - |
| KIAA1143      | 1 | 0 | - | - | - | - | - | - | - |
| KIAA1191      | 1 | 2 | - | - | - | - | - | - | - |
| ARFGEF3       | 1 | 0 | 1 | - | - | - | - | - | - |
| KIAA1324      | 1 | 0 | - | - | - | - | - | - | - |
| KIAA1429      | 1 | 1 | - | - | - | - | - | - | - |
| KIAA1462      | 1 | 0 | 1 | - | - | - | - | - | - |
| KIAA1468      | 1 | 0 | - | - | - | - | - | - | - |
| KIAA1549L     | 1 | 0 | - | - | - | - | - | - | - |
| KIAA1551      | 1 | 1 | - | - | - | - | - | - | - |
| CFAP74        | 1 | 1 | - | - | - | - | - | - | - |
| KIAA1755      | 1 | 2 | 1 | - | - | - | - | - | - |
| KIAA1804      | 1 | 0 | - | - | - | - | - | - | - |
| CCDC183       | 1 | 0 | - | - | - | - | - | - | - |
| KIF13A        | 1 | 0 | 1 | - | - | - | - | - | - |
| KIF13B        | 1 | 2 | - | - | - | - | - | - | - |
| KIF15         | 1 | 2 | - | - | - | - | - | - | - |
| KIF17         | 1 | 1 | - | - | - | - | - | - | - |
| KIF19         | 1 | 1 | - | - | - | - | - | - | - |
| KIF20A        | 1 | 1 | - | - | - | - | - | - | - |
| KIF21A        | 1 | 1 | - | - | - | - | - | - | - |
| KIF24         | 1 | 1 | - | - | - | - | - | - | - |
| KIF26A        | 1 | 0 | 1 | - | - | - | - | - | - |
| KIF26B        | 1 | 1 | - | - | - | - | - | - | - |
| KIF27         | 1 | 2 | - | - | - | - | - | - | - |
| KIF2C         | 1 | 0 | - | - | - | - | - | - | - |
| KIRREL3       | 1 | 0 | - | - | - | - | - | - | - |
| KL8           | 1 | 1 | - | - | - | - | - | - | - |
| KLC3          | 1 | 1 | - | - | - | - | - | - | - |
| KLF1          | 1 | 0 | - | - | - | - | - | - | - |
| KLF17         | 1 | 1 | 1 | - | - | - | - | - | - |
| KLHDC4        | 1 | 2 | - | - | - | - | - | - | - |
| KLHDC7A       | 1 | 0 | 1 | - | - | - | - | - | - |
| KLHDC8A       | 1 | 0 | - | - | - | - | - | - | - |
| KLHDC9        | 1 | 0 | - | - | - | - | - | - | - |
| KLHL24        | 1 | 0 | - | - | - | - | - | - | - |
| KLHL38        | 1 | 2 | - | - | - | - | - | - | - |
| KLHL4         | 1 | 0 | - | - | - | - | - | - | - |
| KLHL42        | 1 | 0 | - | - | - | - | - | - | - |
| KLHL5         | 1 | 1 | - | - | - | - | - | - | - |
| CLK10         | 1 | 0 | - | - | - | - | - | - | - |
| CLK14         | 1 | 0 | - | - | - | - | - | - | - |
| CLKB1         | 1 | 1 | - | - | - | - | - | - | - |
| KNG1          | 1 | 0 | - | - | - | - | - | - | - |

|              |   |   |   |   |     |   |   |   |   |
|--------------|---|---|---|---|-----|---|---|---|---|
| KNTC1        | 1 | 2 | 1 | - | -   | - | - | - | - |
| KPNV7        | 1 | 2 | - | - | -   | - | - | - | - |
| KPTN         | 1 | 0 | - | - | -   | - | - | - | - |
| KRI1         | 1 | 0 | - | - | -   | - | - | - | - |
| KRT1         | 1 | 2 | - | - | -   | - | - | - | - |
| KRT20        | 1 | 0 | - | - | -   | - | - | - | - |
| KRT24        | 1 | 1 | 1 | - | -   | - | - | - | - |
| KRT26        | 1 | 1 | - | - | -   | - | - | - | - |
| KRT32        | 1 | 1 | - | - | -   | - | - | - | - |
| KRT35        | 1 | 0 | - | - | -   | - | - | - | - |
| KRT38        | 1 | 0 | - | - | -   | - | - | - | - |
| KRT39        | 1 | 0 | - | - | -   | - | - | - | - |
| KRT40        | 1 | 0 | - | - | -   | - | - | - | - |
| KRT5         | 1 | 0 | - | - | Yes | - | - | - | - |
| KRT74        | 1 | 0 | - | - | -   | - | - | - | - |
| KRT75        | 1 | 1 | - | - | -   | - | - | - | - |
| KRT77        | 1 | 0 | - | - | -   | - | - | - | - |
| KRT81        | 1 | 0 | - | - | -   | - | - | - | - |
| KRTAP10-10   | 1 | 1 | - | - | -   | - | - | - | - |
| KRTAP12-1    | 1 | 0 | - | - | -   | - | - | - | - |
| KRTAP19-2    | 1 | 0 | - | - | -   | - | - | - | - |
| KRTAP29-1    | 1 | 0 | - | - | -   | - | - | - | - |
| KRTAP9-1     | 1 | 0 | - | - | -   | - | - | - | - |
| KTNI         | 1 | 0 | - | - | -   | - | - | - | - |
| KYNU         | 1 | 1 | - | - | -   | - | - | - | - |
| L1TD1        | 1 | 5 | - | - | -   | - | - | - | - |
| L3MBTL1      | 1 | 2 | - | - | -   | - | - | - | - |
| LACE1        | 1 | 0 | - | - | -   | - | - | - | - |
| LAG3         | 1 | 0 | - | - | -   | - | - | - | - |
| LAMA2        | 1 | 3 | - | - | -   | - | - | - | - |
| LAMA4        | 1 | 1 | - | - | -   | - | - | - | - |
| LAMA5        | 1 | 2 | 1 | - | -   | - | - | - | - |
| LBP          | 1 | 0 | - | - | -   | - | - | - | - |
| LBR          | 1 | 0 | - | - | -   | - | - | - | - |
| LCASL        | 1 | 1 | - | - | -   | - | - | - | - |
| LCE24        | 1 | 0 | - | - | -   | - | - | - | - |
| LCN6         | 1 | 1 | - | - | -   | - | - | - | - |
| LCNL1        | 1 | 0 | - | - | -   | - | - | - | - |
| LCT          | 1 | 2 | - | - | -   | - | - | - | - |
| LDLRAD2      | 1 | 0 | - | - | -   | - | - | - | - |
| LECT1        | 1 | 0 | - | - | -   | - | - | - | - |
| LEPROT       | 1 | 0 | - | - | -   | - | - | - | - |
| LETM2        | 1 | 1 | - | - | -   | - | - | - | - |
| LGALS12      | 1 | 1 | - | - | -   | - | - | - | - |
| LGALS2       | 1 | 0 | - | - | -   | - | - | - | - |
| LGALS3       | 1 | 0 | - | - | -   | - | - | - | - |
| LGALS8       | 1 | 0 | - | - | -   | - | - | - | - |
| LILRB4       | 1 | 0 | - | - | -   | - | - | - | - |
| LIMA1        | 1 | 1 | - | - | -   | - | - | - | - |
| LINS2        | 1 | 0 | - | - | -   | - | - | - | - |
| LIPC         | 1 | 1 | - | - | -   | - | - | - | - |
| LIPF         | 1 | 1 | 1 | - | -   | - | - | - | - |
| LIPH         | 1 | 0 | 1 | - | -   | - | - | - | - |
| LIPJ         | 1 | 0 | - | - | -   | - | - | - | - |
| LIPK         | 1 | 1 | - | - | -   | - | - | - | - |
| LIPM         | 1 | 0 | - | - | -   | - | - | - | - |
| LIPN         | 1 | 0 | - | - | -   | - | - | - | - |
| LIPT2        | 1 | 0 | - | - | -   | - | - | - | - |
| LMAN1L       | 1 | 2 | - | - | -   | - | - | - | - |
| LMAN2L       | 1 | 1 | - | - | -   | - | - | - | - |
| LMBR1        | 1 | 1 | - | - | -   | - | - | - | - |
| LMF1         | 1 | 1 | - | - | -   | - | - | - | - |
| LMO7         | 1 | 2 | - | - | Yes | - | - | - | - |
| LOC100129924 | 1 | 0 | - | - | -   | - | - | - | - |
| LOC100506388 | 1 | 0 | - | - | -   | - | - | - | - |
| LOC100506422 | 1 | 0 | - | - | -   | - | - | - | - |
| LOC100507003 | 1 | 0 | - | - | -   | - | - | - | - |
| LOC100653515 | 1 | 0 | - | - | -   | - | - | - | - |
| LOC149373    | 1 | 0 | - | - | -   | - | - | - | - |
| LOC283710    | 1 | 0 | - | - | -   | - | - | - | - |
| LOC339862    | 1 | 0 | - | - | -   | - | - | - | - |
| LOC401052    | 1 | 0 | - | - | -   | - | - | - | - |
| LOC440563    | 1 | 2 | - | - | -   | - | - | - | - |
| LOC643669    | 1 | 0 | - | - | -   | - | - | - | - |
| LOC728819    | 1 | 0 | - | - | -   | - | - | - | - |
| LOC730183    | 1 | 0 | - | - | -   | - | - | - | - |
| LOC81691     | 1 | 2 | - | - | -   | - | - | - | - |
| LOXRF2       | 1 | 0 | - | - | -   | - | - | - | - |
| LOXHD1       | 1 | 3 | - | - | -   | - | - | - | - |
| LOXL1        | 1 | 0 | - | - | -   | - | - | - | - |
| LOXL2        | 1 | 0 | - | - | -   | - | - | - | - |
| LPA          | 1 | 1 | 1 | - | -   | - | - | - | - |
| LPIN1        | 1 | 0 | - | - | -   | - | - | - | - |
| LPPR5        | 1 | 0 | - | - | -   | - | - | - | - |
| LRCH3        | 1 | 1 | - | - | -   | - | - | - | - |
| LRCOL1       | 1 | 0 | - | - | -   | - | - | - | - |
| LRGUK        | 1 | 0 | - | - | -   | - | - | - | - |
| LRIG1        | 1 | 2 | - | - | -   | - | - | - | - |
| LRIG3        | 1 | 2 | - | - | -   | - | - | - | - |
| LRIT1        | 1 | 0 | - | - | -   | - | - | - | - |
| LRIT2        | 1 | 2 | - | - | -   | - | - | - | - |
| LRP3         | 1 | 0 | - | - | -   | - | - | - | - |
| LRPAP1       | 1 | 0 | - | - | -   | - | - | - | - |
| LRR1         | 1 | 1 | - | - | -   | - | - | - | - |
| LRRC16B      | 1 | 1 | - | - | -   | - | - | - | - |
| LRRC2        | 1 | 0 | - | - | -   | - | - | - | - |
| LRRC20       | 1 | 0 | - | - | -   | - | - | - | - |
| LRRC23       | 1 | 1 | - | - | -   | - | - | - | - |
| LRRC24       | 1 | 0 | 1 | - | -   | - | - | - | - |
| LRRC29       | 1 | 0 | - | - | -   | - | - | - | - |
| LRRC3        | 1 | 1 | - | - | -   | - | - | - | - |
| LRRC30       | 1 | 0 | - | - | -   | - | - | - | - |
| LRRC31       | 1 | 0 | - | - | -   | - | - | - | - |
| LRRC36       | 1 | 0 | - | - | -   | - | - | - | - |
| LRRC39       | 1 | 1 | - | - | -   | - | - | - | - |
| LRRC56       | 1 | 1 | - | - | -   | - | - | - | - |

|          |   |   |   |   |     |     |   |     |   |
|----------|---|---|---|---|-----|-----|---|-----|---|
| LRRC6    | 1 | 2 | - | - | -   | -   | - | -   | - |
| LRRC72   | 1 | 0 | - | - | -   | -   | - | -   | - |
| LRRK2    | 1 | 1 | 1 | - | -   | -   | - | -   | - |
| LSMEM2   | 1 | 1 | - | - | -   | -   | - | -   | - |
| LSP1     | 1 | 0 | - | - | -   | -   | - | -   | - |
| LSR      | 1 | 3 | - | - | -   | -   | - | -   | - |
| LTB4R2   | 1 | 0 | - | - | -   | -   | - | -   | - |
| LTC4S    | 1 | 1 | - | - | -   | -   | - | -   | - |
| LUZP4    | 1 | 0 | - | - | -   | -   | - | -   | - |
| LY6H     | 1 | 0 | - | - | -   | -   | - | -   | - |
| LY9      | 1 | 1 | - | - | -   | -   | - | -   | - |
| LYG1     | 1 | 1 | - | - | -   | -   | - | -   | - |
| LYG2     | 1 | 1 | - | - | -   | -   | - | -   | - |
| LYL1     | 1 | 0 | - | - | -   | -   | - | -   | - |
| LYN      | 1 | 0 | - | - | -   | -   | - | -   | - |
| LYNX1    | 1 | 0 | 1 | - | -   | -   | - | -   | - |
| LYPD4    | 1 | 0 | - | - | -   | -   | - | -   | - |
| LYPD5    | 1 | 0 | - | - | -   | -   | - | -   | - |
| LYPLAL1  | 1 | 1 | - | - | -   | -   | - | -   | - |
| LYRM2    | 1 | 0 | - | - | -   | -   | - | -   | - |
| LYZ      | 1 | 0 | - | - | -   | -   | - | -   | - |
| LYZL1    | 1 | 0 | - | - | -   | -   | - | -   | - |
| LZIC     | 1 | 0 | - | - | -   | -   | - | -   | - |
| MAB21L3  | 1 | 0 | - | - | -   | -   | - | -   | - |
| MAD2L2   | 1 | 0 | - | - | -   | -   | - | -   | - |
| MAGEA4   | 1 | 0 | - | - | -   | -   | - | -   | - |
| MAGEC3   | 1 | 0 | - | - | -   | -   | - | -   | - |
| MAGED2   | 1 | 0 | - | - | -   | -   | - | -   | - |
| MAGEH1   | 1 | 0 | - | - | -   | -   | - | -   | - |
| MAMLI1   | 1 | 0 | - | - | -   | -   | - | -   | - |
| MAMSTR   | 1 | 0 | - | - | -   | -   | - | -   | - |
| MAN2B2   | 1 | 0 | - | - | -   | -   | - | -   | - |
| MAP10    | 1 | 0 | - | - | -   | -   | - | -   | - |
| MAP2K2   | 1 | 0 | - | - | -   | -   | - | -   | - |
| MAP2K3   | 1 | 1 | - | - | -   | -   | - | -   | - |
| MAP2K7   | 1 | 0 | - | - | -   | -   | - | -   | - |
| MAP3K14  | 1 | 0 | - | - | -   | -   | - | -   | - |
| MAP3K15  | 1 | 2 | - | - | -   | -   | - | -   | - |
| MAP3K7   | 1 | 0 | - | - | -   | -   | - | -   | - |
| MAP4K5   | 1 | 0 | - | - | -   | -   | - | -   | - |
| MAPK13   | 1 | 0 | - | - | -   | -   | - | -   | - |
| MAPK15   | 1 | 1 | 1 | - | -   | -   | - | -   | - |
| MARK2    | 1 | 1 | - | - | -   | -   | - | -   | - |
| MARS     | 1 | 0 | - | - | -   | -   | - | -   | - |
| MASP1    | 1 | 2 | - | - | -   | -   | - | -   | - |
| MASF4    | 1 | 0 | - | - | -   | -   | - | -   | - |
| MAT2A    | 1 | 0 | - | - | -   | -   | - | -   | - |
| MATR3    | 1 | 0 | - | - | -   | -   | - | -   | - |
| MBD2     | 1 | 0 | - | - | Yes | -   | - | -   | - |
| MBD5     | 1 | 0 | 1 | - | -   | -   | - | -   | - |
| MBLAC1   | 1 | 0 | - | - | -   | -   | - | -   | - |
| MBOAT7   | 1 | 1 | - | - | -   | -   | - | -   | - |
| MC1R     | 1 | 1 | - | - | Yes | -   | - | -   | - |
| MC3R     | 1 | 0 | - | - | -   | -   | - | -   | - |
| MC4R     | 1 | 0 | - | - | -   | -   | - | -   | - |
| MCAM     | 1 | 1 | - | - | -   | -   | - | -   | - |
| MCAT     | 1 | 0 | - | - | -   | -   | - | -   | - |
| MCCC2    | 1 | 1 | - | - | -   | -   | - | -   | - |
| MCF2L2   | 1 | 0 | 1 | - | -   | -   | - | -   | - |
| MCM3     | 1 | 2 | - | - | -   | -   | - | -   | - |
| MCM7     | 1 | 1 | - | - | -   | -   | - | -   | - |
| MCM9     | 1 | 0 | - | - | -   | -   | - | -   | - |
| MCOLN3   | 1 | 1 | - | - | -   | -   | - | -   | - |
| MCPH1    | 1 | 2 | - | - | Yes | -   | - | -   | - |
| MCU      | 1 | 0 | - | - | -   | -   | - | -   | - |
| MDF1     | 1 | 0 | - | - | -   | -   | - | -   | - |
| MDN1     | 1 | 2 | 1 | - | -   | -   | - | -   | - |
| MEAF6    | 1 | 0 | - | - | -   | -   | - | -   | - |
| MECR     | 1 | 1 | - | - | -   | -   | - | -   | - |
| MED16    | 1 | 2 | - | - | -   | -   | - | -   | - |
| MED17    | 1 | 1 | - | - | Yes | -   | - | -   | - |
| MED22    | 1 | 1 | - | - | -   | -   | - | -   | - |
| MED26    | 1 | 1 | - | - | -   | -   | - | -   | - |
| MEDAG    | 1 | 0 | - | - | -   | -   | - | -   | - |
| MEF2B    | 1 | 0 | - | - | -   | -   | - | -   | - |
| MEGF11   | 1 | 1 | - | - | -   | -   | - | -   | - |
| MEGF6    | 1 | 2 | - | - | -   | -   | - | -   | - |
| MEIOB    | 1 | 1 | - | - | -   | -   | - | -   | - |
| MEPE     | 1 | 1 | - | - | -   | -   | - | -   | - |
| MERTK    | 1 | 0 | - | - | -   | -   | - | -   | - |
| MET      | 1 | 0 | - | - | -   | Yes | - | Yes | - |
| METRN    | 1 | 0 | - | - | -   | -   | - | -   | - |
| METTL11B | 1 | 0 | - | - | -   | -   | - | -   | - |
| METTL12  | 1 | 0 | - | - | -   | -   | - | -   | - |
| METTL17  | 1 | 0 | - | - | -   | -   | - | -   | - |
| METTL18  | 1 | 0 | - | - | -   | -   | - | -   | - |
| METTL21A | 1 | 1 | - | - | -   | -   | - | -   | - |
| METTL7A  | 1 | 1 | - | - | -   | -   | - | -   | - |
| METTL7B  | 1 | 0 | - | - | -   | -   | - | -   | - |
| MFGES    | 1 | 0 | - | - | -   | -   | - | -   | - |
| MFHAS1   | 1 | 1 | - | - | -   | -   | - | -   | - |
| MFN1     | 1 | 1 | - | - | -   | -   | - | -   | - |
| MFSD10   | 1 | 3 | - | - | -   | -   | - | -   | - |
| MFSD2B   | 1 | 1 | - | - | -   | -   | - | -   | - |
| MFSD3    | 1 | 2 | - | - | -   | -   | - | -   | - |
| MFSD6L   | 1 | 3 | - | - | -   | -   | - | -   | - |
| MGAM     | 1 | 4 | - | - | -   | -   | - | -   | - |
| MGAT4C   | 1 | 0 | - | - | -   | -   | - | -   | - |
| MGMT     | 1 | 0 | - | - | Yes | -   | - | -   | - |
| MGP      | 1 | 0 | - | - | -   | -   | - | -   | - |
| MGST2    | 1 | 0 | - | - | -   | -   | - | -   | - |
| MGST3    | 1 | 1 | - | - | -   | -   | - | -   | - |
| MIB2     | 1 | 1 | - | - | -   | -   | - | -   | - |
| MICU1    | 1 | 0 | - | - | -   | -   | - | -   | - |
| MICU2    | 1 | 0 | - | - | -   | -   | - | -   | - |
| MICU3    | 1 | 0 | - | - | -   | -   | - | -   | - |

|         |   |   |   |     |     |     |     |   |
|---------|---|---|---|-----|-----|-----|-----|---|
| MIER2   | 1 | 0 | - | -   | -   | -   | -   | - |
| MIP     | 1 | 2 | - | -   | -   | -   | -   | - |
| MIOX    | 1 | 0 | - | -   | -   | -   | -   | - |
| MIP     | 1 | 1 | - | -   | -   | -   | -   | - |
| MITF    | 1 | 0 | - | -   | -   | -   | -   | - |
| MK167   | 1 | 1 | - | -   | -   | -   | -   | - |
| NFK     | 1 | 1 | - | -   | -   | -   | -   | - |
| MKKS    | 1 | 2 | - | -   | -   | -   | -   | - |
| MKS1    | 1 | 0 | - | -   | -   | -   | -   | - |
| MLANA   | 1 | 0 | - | -   | -   | -   | -   | - |
| MLF1    | 1 | 0 | - | -   | -   | -   | -   | - |
| MLH3    | 1 | 0 | - | Yes | -   | -   | -   | - |
| MLKL    | 1 | 1 | - | -   | -   | -   | -   | - |
| MLLT10  | 1 | 0 | - | -   | -   | -   | -   | - |
| MLNR    | 1 | 1 | - | -   | -   | -   | -   | - |
| MMAA    | 1 | 1 | - | -   | -   | -   | -   | - |
| MMACHC  | 1 | 1 | - | -   | -   | -   | -   | - |
| MMP19   | 1 | 2 | - | -   | -   | -   | -   | - |
| MMP20   | 1 | 0 | - | -   | -   | -   | -   | - |
| MMP21   | 1 | 1 | - | -   | -   | -   | -   | - |
| MMP24   | 1 | 0 | - | -   | -   | -   | -   | - |
| MMP26   | 1 | 0 | - | -   | -   | -   | -   | - |
| MMP27   | 1 | 0 | 1 | -   | -   | -   | -   | - |
| MMP7    | 1 | 0 | - | -   | -   | -   | -   | - |
| MMP8    | 1 | 3 | - | -   | -   | -   | -   | - |
| MMRN2   | 1 | 0 | - | -   | -   | -   | -   | - |
| MND1    | 1 | 1 | - | -   | -   | -   | -   | - |
| MOCOS   | 1 | 2 | - | -   | -   | -   | -   | - |
| MOGAT1  | 1 | 0 | 1 | -   | -   | -   | -   | - |
| MOGS    | 1 | 1 | - | -   | -   | -   | -   | - |
| MORC3   | 1 | 0 | - | -   | -   | -   | -   | - |
| MPL     | 1 | 2 | - | -   | Yes | -   | -   | - |
| MPP7    | 1 | 0 | - | -   | -   | -   | -   | - |
| MPRIIP  | 1 | 1 | - | -   | -   | -   | -   | - |
| MPST    | 1 | 0 | - | -   | -   | -   | -   | - |
| MPZ3    | 1 | 0 | - | -   | -   | -   | -   | - |
| MRE11A  | 1 | 0 | 1 | Yes | -   | -   | -   | - |
| MRGPRD  | 1 | 0 | - | -   | -   | -   | -   | - |
| MRGPRG  | 1 | 1 | - | -   | -   | -   | -   | - |
| MRII    | 1 | 1 | - | -   | -   | -   | -   | - |
| MRO     | 1 | 0 | - | -   | -   | -   | -   | - |
| MROH2B  | 1 | 2 | - | -   | -   | -   | -   | - |
| MROH5   | 1 | 4 | - | -   | -   | -   | -   | - |
| MROH6   | 1 | 1 | 1 | -   | -   | -   | -   | - |
| MROH7   | 1 | 0 | - | -   | -   | -   | -   | - |
| MROH9   | 1 | 1 | - | -   | -   | -   | -   | - |
| MRPL14  | 1 | 0 | - | -   | -   | -   | -   | - |
| MRPL23  | 1 | 0 | - | -   | -   | -   | -   | - |
| MRPL30  | 1 | 1 | 1 | -   | -   | -   | -   | - |
| MRPL36  | 1 | 1 | - | -   | -   | -   | -   | - |
| MRPL37  | 1 | 0 | - | -   | -   | -   | -   | - |
| MRPL39  | 1 | 0 | - | -   | -   | -   | -   | - |
| MRPL45  | 1 | 0 | - | -   | -   | -   | -   | - |
| MRPL9   | 1 | 0 | - | -   | -   | -   | -   | - |
| MRPS15  | 1 | 0 | - | -   | -   | -   | -   | - |
| MRPS18A | 1 | 0 | - | -   | -   | -   | -   | - |
| MRPS30  | 1 | 2 | - | -   | -   | -   | -   | - |
| MRPS35  | 1 | 0 | - | -   | -   | -   | -   | - |
| MSA12   | 1 | 0 | - | -   | -   | -   | -   | - |
| MSA14   | 1 | 2 | 1 | -   | -   | -   | -   | - |
| MSA44A  | 1 | 1 | - | -   | -   | -   | -   | - |
| MSA45   | 1 | 0 | - | -   | -   | -   | -   | - |
| MSGN1   | 1 | 0 | - | -   | -   | -   | -   | - |
| MSH2    | 1 | 0 | - | Yes | Yes | Yes | Yes | - |
| MSR1    | 1 | 2 | - | -   | -   | -   | -   | - |
| MSTO1   | 1 | 0 | - | -   | -   | -   | -   | - |
| MTIX    | 1 | 0 | - | -   | -   | -   | -   | - |
| MTA1    | 1 | 0 | - | -   | -   | -   | -   | - |
| MTCH1   | 1 | 0 | - | -   | -   | -   | -   | - |
| MTERF1  | 1 | 1 | - | -   | -   | -   | -   | - |
| MTFP1   | 1 | 0 | - | -   | -   | -   | -   | - |
| MTFR1   | 1 | 0 | - | -   | -   | -   | -   | - |
| MTHFS   | 1 | 0 | - | -   | -   | -   | -   | - |
| MTHFSD  | 1 | 2 | - | -   | -   | -   | -   | - |
| MTIF3   | 1 | 1 | - | -   | -   | -   | -   | - |
| MTMR12  | 1 | 0 | 1 | -   | -   | -   | -   | - |
| MTMR3   | 1 | 1 | - | -   | -   | -   | -   | - |
| MTNRI1A | 1 | 1 | - | -   | -   | -   | -   | - |
| MTO1    | 1 | 2 | - | -   | -   | -   | -   | - |
| MTRF1   | 1 | 2 | - | -   | -   | -   | -   | - |
| MTRF1L  | 1 | 0 | - | -   | -   | -   | -   | - |
| MITP    | 1 | 2 | - | -   | -   | -   | -   | - |
| MTUS1   | 1 | 0 | - | -   | -   | -   | -   | - |
| MTX3    | 1 | 0 | - | -   | -   | -   | -   | - |
| MUC12   | 1 | 3 | - | -   | -   | -   | -   | - |
| MUC15   | 1 | 0 | - | -   | -   | -   | -   | - |
| MUC20   | 1 | 1 | 1 | -   | -   | -   | -   | - |
| MUC7    | 1 | 0 | - | -   | -   | -   | -   | - |
| MUCL1   | 1 | 1 | - | -   | -   | -   | -   | - |
| MUS81   | 1 | 0 | - | Yes | -   | -   | -   | - |
| MUT     | 1 | 0 | - | -   | -   | -   | -   | - |
| MVB12B  | 1 | 0 | - | -   | -   | -   | -   | - |
| MX1     | 1 | 0 | - | -   | -   | -   | -   | - |
| MX2     | 1 | 2 | - | -   | -   | -   | -   | - |
| MXR48   | 1 | 0 | - | -   | -   | -   | -   | - |
| MYBBP1A | 1 | 2 | - | -   | -   | -   | -   | - |
| MYBPC2  | 1 | 0 | - | -   | -   | -   | -   | - |
| MYBPHL  | 1 | 1 | - | -   | -   | -   | -   | - |
| MYCBP2  | 1 | 1 | 1 | -   | -   | -   | -   | - |
| MYCBPAP | 1 | 1 | - | -   | -   | -   | -   | - |
| MYEOV   | 1 | 0 | - | -   | -   | -   | -   | - |
| MYEOV2  | 1 | 0 | - | -   | -   | -   | -   | - |
| MYH10   | 1 | 0 | - | -   | -   | -   | -   | - |
| MYH13   | 1 | 1 | 1 | -   | -   | -   | -   | - |
| MYH3    | 1 | 0 | - | -   | -   | -   | -   | - |
| MYH7    | 1 | 0 | - | -   | -   | -   | -   | - |

|           |   |   |   |     |     |   |   |     |
|-----------|---|---|---|-----|-----|---|---|-----|
| MYL6      | 1 | 0 | - | -   | -   | - | - | -   |
| MYO15A    | 1 | 1 | - | -   | -   | - | - | -   |
| MYO16     | 1 | 0 | - | -   | -   | - | - | -   |
| MYO18A    | 1 | 2 | 1 | -   | -   | - | - | -   |
| MYO19     | 1 | 0 | - | -   | -   | - | - | -   |
| MYO1B     | 1 | 0 | - | -   | -   | - | - | -   |
| MYO1C     | 1 | 4 | - | -   | -   | - | - | -   |
| MYO5A     | 1 | 0 | - | -   | -   | - | - | -   |
| MYO5C     | 1 | 1 | 1 | -   | -   | - | - | -   |
| MYO6      | 1 | 0 | - | -   | -   | - | - | -   |
| MYO7A     | 1 | 3 | - | -   | -   | - | - | -   |
| MYO9A     | 1 | 0 | - | -   | -   | - | - | -   |
| MYOC      | 1 | 1 | - | -   | -   | - | - | -   |
| MYOM1     | 1 | 2 | - | -   | -   | - | - | -   |
| MYOT      | 1 | 0 | - | -   | -   | - | - | -   |
| MYOZ3     | 1 | 1 | - | -   | -   | - | - | -   |
| MYSM1     | 1 | 1 | - | -   | -   | - | - | -   |
| NAA16     | 1 | 0 | - | -   | -   | - | - | -   |
| NAALADL2  | 1 | 4 | - | -   | -   | - | - | -   |
| NAE1      | 1 | 0 | - | -   | -   | - | - | -   |
| NAGK      | 1 | 1 | - | -   | -   | - | - | -   |
| NAIP      | 1 | 0 | - | -   | -   | - | - | -   |
| NANOGNB   | 1 | 1 | - | -   | -   | - | - | -   |
| NAPA      | 1 | 0 | - | -   | -   | - | - | -   |
| NAPSA     | 1 | 0 | 1 | -   | -   | - | - | -   |
| NARF      | 1 | 0 | - | -   | -   | - | - | -   |
| NARS2     | 1 | 0 | - | -   | -   | - | - | -   |
| NAT1      | 1 | 0 | - | -   | -   | - | - | -   |
| NAT10     | 1 | 1 | - | -   | -   | - | - | -   |
| NBL1      | 1 | 0 | - | -   | -   | - | - | -   |
| NBN       | 1 | 1 | - | Yes | -   | - | - | Yes |
| NCAPG     | 1 | 0 | - | -   | -   | - | - | -   |
| NCAPH     | 1 | 0 | - | -   | -   | - | - | -   |
| NCEH1     | 1 | 0 | - | -   | -   | - | - | -   |
| NCF2      | 1 | 1 | - | -   | -   | - | - | -   |
| NCOA7     | 1 | 0 | - | -   | -   | - | - | -   |
| NCR2      | 1 | 0 | - | -   | -   | - | - | -   |
| NDC80     | 1 | 0 | - | -   | -   | - | - | -   |
| NDN       | 1 | 0 | 1 | -   | -   | - | - | -   |
| NDRG3     | 1 | 0 | - | -   | -   | - | - | -   |
| NDS1      | 1 | 0 | 1 | -   | -   | - | - | -   |
| NDS13     | 1 | 0 | - | -   | -   | - | - | -   |
| NDUFA12   | 1 | 1 | - | -   | -   | - | - | -   |
| NDUFA4L2  | 1 | 1 | - | -   | -   | - | - | -   |
| NDUFA9    | 1 | 0 | - | -   | -   | - | - | -   |
| NDUFAF3   | 1 | 0 | 1 | -   | -   | - | - | -   |
| NDUFB5    | 1 | 0 | - | -   | -   | - | - | -   |
| NDUFB7    | 1 | 0 | - | -   | -   | - | - | -   |
| NDUFC1    | 1 | 0 | - | -   | -   | - | - | -   |
| NEB       | 1 | 4 | 4 | -   | -   | - | - | -   |
| NEK11     | 1 | 2 | - | -   | -   | - | - | -   |
| NEK2      | 1 | 0 | - | -   | -   | - | - | -   |
| NEK4      | 1 | 0 | - | -   | -   | - | - | -   |
| NEK9      | 1 | 3 | - | -   | -   | - | - | -   |
| NELFB     | 1 | 1 | - | -   | -   | - | - | -   |
| NEMF      | 1 | 0 | 1 | -   | -   | - | - | -   |
| NEU2      | 1 | 0 | - | -   | -   | - | - | -   |
| NEURL1    | 1 | 0 | - | -   | -   | - | - | -   |
| NF1       | 1 | 1 | - | -   | Yes | - | - | Yes |
| NF2       | 1 | 0 | - | -   | Yes | - | - | Yes |
| NFASC     | 1 | 0 | - | -   | -   | - | - | -   |
| NFATC1    | 1 | 0 | - | -   | -   | - | - | -   |
| NFATC3    | 1 | 1 | - | -   | -   | - | - | -   |
| NFATC4    | 1 | 0 | - | -   | -   | - | - | -   |
| NFE2      | 1 | 0 | - | -   | -   | - | - | -   |
| NFE2L2    | 1 | 0 | - | -   | Yes | - | - | -   |
| NFKB1B    | 1 | 1 | - | -   | -   | - | - | -   |
| NFKB1E    | 1 | 0 | - | -   | -   | - | - | -   |
| NFYA      | 1 | 0 | - | -   | -   | - | - | -   |
| NIN1      | 1 | 0 | - | -   | -   | - | - | -   |
| NIP42     | 1 | 0 | - | -   | -   | - | - | -   |
| NIPSNAP3A | 1 | 0 | - | -   | -   | - | - | -   |
| NIPSNAP3B | 1 | 1 | - | -   | -   | - | - | -   |
| NIT1      | 1 | 0 | - | -   | -   | - | - | -   |
| NKIRAS2   | 1 | 0 | - | -   | -   | - | - | -   |
| NKTR      | 1 | 0 | - | -   | -   | - | - | -   |
| NKY6-3    | 1 | 0 | 1 | -   | -   | - | - | -   |
| NLRP14    | 1 | 3 | - | -   | -   | - | - | -   |
| NLRP5     | 1 | 0 | 2 | -   | -   | - | - | -   |
| NLRP7     | 1 | 2 | - | -   | -   | - | - | -   |
| NLRP9     | 1 | 2 | - | -   | -   | - | - | -   |
| NMD3      | 1 | 0 | - | -   | -   | - | - | -   |
| NME7      | 1 | 0 | - | -   | -   | - | - | -   |
| NME8      | 1 | 3 | - | -   | -   | - | - | -   |
| NMI       | 1 | 2 | - | -   | -   | - | - | -   |
| NMU       | 1 | 0 | - | -   | -   | - | - | -   |
| NOBOX     | 1 | 0 | - | -   | -   | - | - | -   |
| NOD1      | 1 | 1 | - | -   | -   | - | - | -   |
| NOL8      | 1 | 2 | - | -   | -   | - | - | -   |
| NOL9      | 1 | 0 | - | -   | -   | - | - | -   |
| NOLC1     | 1 | 0 | - | -   | -   | - | - | -   |
| NOS2      | 1 | 0 | - | -   | -   | - | - | -   |
| NOSIP     | 1 | 0 | - | -   | -   | - | - | -   |
| NOTO      | 1 | 0 | - | -   | -   | - | - | -   |
| NOX3      | 1 | 0 | - | -   | -   | - | - | -   |
| NOXA1     | 1 | 3 | - | -   | -   | - | - | -   |
| NPAS1     | 1 | 0 | - | -   | -   | - | - | -   |
| NPAT      | 1 | 0 | - | -   | -   | - | - | -   |
| NPHP3     | 1 | 2 | - | -   | -   | - | - | -   |
| NPHP4     | 1 | 3 | - | -   | -   | - | - | -   |
| NPR2      | 1 | 0 | - | -   | -   | - | - | -   |
| NPSR1     | 1 | 0 | - | -   | -   | - | - | -   |
| NPTXR     | 1 | 0 | - | -   | -   | - | - | -   |
| NPW       | 1 | 0 | - | -   | -   | - | - | -   |
| NPY1R     | 1 | 0 | - | -   | -   | - | - | -   |
| NPY4R     | 1 | 0 | - | -   | -   | - | - | -   |





|         |   |   |   |   |   |     |   |   |
|---------|---|---|---|---|---|-----|---|---|
| PCDHGB3 | 1 | 1 | - | - | - | -   | - | - |
| PCE11A  | 1 | 0 | - | - | - | -   | - | - |
| PCGF3   | 1 | 0 | - | - | - | -   | - | - |
| PCK2    | 1 | 3 | - | - | - | -   | - | - |
| PCMI    | 1 | 1 | - | - | - | -   | - | - |
| PCNX    | 1 | 1 | - | - | - | -   | - | - |
| PCNXL4  | 1 | 2 | - | - | - | -   | - | - |
| PCP2    | 1 | 0 | - | - | - | -   | - | - |
| PCSK4   | 1 | 1 | 1 | - | - | -   | - | - |
| PCSK9   | 1 | 2 | - | - | - | -   | - | - |
| PCTP    | 1 | 0 | - | - | - | -   | - | - |
| PCYOX1  | 1 | 1 | - | - | - | -   | - | - |
| PCYT2   | 1 | 1 | - | - | - | -   | - | - |
| PDCD6   | 1 | 1 | - | - | - | -   | - | - |
| PDE11A  | 1 | 1 | - | - | - | -   | - | - |
| PDE12   | 1 | 0 | - | - | - | -   | - | - |
| PDE1A   | 1 | 0 | - | - | - | -   | - | - |
| PDE1C   | 1 | 1 | - | - | - | -   | - | - |
| PDE4D   | 1 | 0 | - | - | - | -   | - | - |
| PDE5A   | 1 | 0 | - | - | - | -   | - | - |
| PDE9A   | 1 | 0 | - | - | - | -   | - | - |
| PDGFRB  | 1 | 2 | - | - | - | -   | - | - |
| PDGFRL  | 1 | 0 | - | - | - | -   | - | - |
| PDHA1   | 1 | 0 | - | - | - | -   | - | - |
| PDHB    | 1 | 0 | - | - | - | -   | - | - |
| PDLA2   | 1 | 3 | - | - | - | -   | - | - |
| PDK4    | 1 | 0 | - | - | - | -   | - | - |
| PDLIM2  | 1 | 0 | - | - | - | -   | - | - |
| PDPK1   | 1 | 0 | - | - | - | -   | - | - |
| PDX1    | 1 | 1 | - | - | - | -   | - | - |
| PDZRN4  | 1 | 0 | 1 | - | - | -   | - | - |
| PEAK1   | 1 | 0 | - | - | - | -   | - | - |
| PEAR1   | 1 | 1 | 2 | - | - | -   | - | - |
| PEBP4   | 1 | 0 | - | - | - | -   | - | - |
| PEF1    | 1 | 0 | - | - | - | -   | - | - |
| PER2    | 1 | 1 | - | - | - | -   | - | - |
| PER3    | 1 | 1 | - | - | - | -   | - | - |
| PEX11A  | 1 | 0 | - | - | - | -   | - | - |
| PEX11G  | 1 | 0 | - | - | - | -   | - | - |
| PEX16   | 1 | 0 | - | - | - | -   | - | - |
| PEX5    | 1 | 0 | - | - | - | -   | - | - |
| PFDN5   | 1 | 0 | - | - | - | -   | - | - |
| PFKFB1  | 1 | 2 | - | - | - | -   | - | - |
| PFKM    | 1 | 2 | - | - | - | -   | - | - |
| PFKP    | 1 | 2 | - | - | - | -   | - | - |
| PGAM2   | 1 | 0 | - | - | - | -   | - | - |
| PGAP1   | 1 | 2 | - | - | - | -   | - | - |
| PGAP2   | 1 | 1 | - | - | - | -   | - | - |
| PGRD2   | 1 | 1 | - | - | - | -   | - | - |
| PGC     | 1 | 2 | - | - | - | -   | - | - |
| PGLS    | 1 | 1 | - | - | - | -   | - | - |
| PGLYRP1 | 1 | 1 | - | - | - | -   | - | - |
| PGM5    | 1 | 0 | - | - | - | -   | - | - |
| PGPEP1L | 1 | 0 | - | - | - | -   | - | - |
| PHF11   | 1 | 0 | - | - | - | -   | - | - |
| PHF3    | 1 | 0 | - | - | - | -   | - | - |
| PHIP    | 1 | 0 | - | - | - | -   | - | - |
| PHKA1   | 1 | 0 | - | - | - | -   | - | - |
| PHKB    | 1 | 2 | - | - | - | -   | - | - |
| PHLDB1  | 1 | 0 | - | - | - | -   | - | - |
| PHLDB3  | 1 | 0 | - | - | - | -   | - | - |
| PHPT1   | 1 | 0 | - | - | - | -   | - | - |
| PI16    | 1 | 0 | - | - | - | -   | - | - |
| PI4KA   | 1 | 1 | - | - | - | -   | - | - |
| PIAS2   | 1 | 0 | - | - | - | -   | - | - |
| PIGB    | 1 | 1 | - | - | - | -   | - | - |
| PIGG    | 1 | 3 | - | - | - | -   | - | - |
| PIGL    | 1 | 0 | - | - | - | -   | - | - |
| PIGP    | 1 | 0 | - | - | - | -   | - | - |
| PIGZ    | 1 | 1 | - | - | - | -   | - | - |
| PIK3C2A | 1 | 0 | - | - | - | -   | - | - |
| PIK3C2B | 1 | 1 | - | - | - | -   | - | - |
| PIK3C3  | 1 | 0 | - | - | - | -   | - | - |
| PIK3R1  | 1 | 2 | - | - | - | Yes | - | - |
| PIIRA   | 1 | 0 | - | - | - | -   | - | - |
| PIPSK1B | 1 | 0 | - | - | - | -   | - | - |
| PIPSKL1 | 1 | 0 | - | - | - | -   | - | - |
| PITRM1  | 1 | 0 | - | - | - | -   | - | - |
| PKD2    | 1 | 0 | - | - | - | -   | - | - |
| PKP3    | 1 | 0 | - | - | - | -   | - | - |
| PLA2G10 | 1 | 0 | - | - | - | -   | - | - |
| PLA2G1B | 1 | 0 | - | - | - | -   | - | - |
| PLA2G2F | 1 | 0 | - | - | - | -   | - | - |
| PLA2G4C | 1 | 1 | - | - | - | -   | - | - |
| PLA2G4D | 1 | 2 | - | - | - | -   | - | - |
| PLA2G6  | 1 | 0 | - | - | - | -   | - | - |
| PLA2R1  | 1 | 3 | - | - | - | -   | - | - |
| OOSP2   | 1 | 0 | - | - | - | -   | - | - |
| PLAUR   | 1 | 2 | - | - | - | -   | - | - |
| PLCD3   | 1 | 0 | - | - | - | -   | - | - |
| PLCD4   | 1 | 0 | 1 | - | - | -   | - | - |
| PLCE1   | 1 | 0 | - | - | - | -   | - | - |
| PLCG1   | 1 | 0 | - | - | - | -   | - | - |
| PLCZ1   | 1 | 1 | - | - | - | -   | - | - |
| PLD2    | 1 | 2 | - | - | - | -   | - | - |
| PLD5    | 1 | 0 | - | - | - | -   | - | - |
| PLD6    | 1 | 1 | - | - | - | -   | - | - |
| PLEC    | 1 | 2 | 2 | - | - | -   | - | - |
| PLEKHA7 | 1 | 0 | - | - | - | -   | - | - |
| PLEKHG3 | 1 | 0 | 1 | - | - | -   | - | - |
| PLEKHH3 | 1 | 1 | - | - | - | -   | - | - |
| PLEKHN1 | 1 | 0 | - | - | - | -   | - | - |
| PLEKHS1 | 1 | 0 | - | - | - | -   | - | - |
| PLIN5   | 1 | 0 | - | - | - | -   | - | - |
| KIZ     | 1 | 2 | - | - | - | -   | - | - |
| PLK4    | 1 | 1 | - | - | - | -   | - | - |



|             |   |   |   |     |   |     |   |     |
|-------------|---|---|---|-----|---|-----|---|-----|
| PLS3        | 1 | 0 | - | -   | - | -   | - | -   |
| PLSCR2      | 1 | 0 | - | -   | - | -   | - | -   |
| PLSCR4      | 1 | 0 | - | -   | - | -   | - | -   |
| PLSCR5      | 1 | 1 | - | -   | - | -   | - | -   |
| PLXNA1      | 1 | 0 | - | -   | - | -   | - | -   |
| PLXNB1      | 1 | 0 | - | -   | - | -   | - | -   |
| PM20D1      | 1 | 0 | - | -   | - | -   | - | -   |
| PMEL        | 1 | 1 | - | -   | - | -   | - | -   |
| PMEPA1      | 1 | 0 | - | -   | - | -   | - | -   |
| PMF1-BGLAP  | 1 | 2 | - | -   | - | -   | - | -   |
| PMM1        | 1 | 0 | - | -   | - | -   | - | -   |
| PMPCA       | 1 | 1 | - | -   | - | -   | - | -   |
| PMS2        | 1 | 0 | - | Yes | - | Yes | - | Yes |
| PNLIP       | 1 | 0 | 1 | -   | - | -   | - | -   |
| PNMA3       | 1 | 1 | - | -   | - | -   | - | -   |
| PNMAL1      | 1 | 0 | - | -   | - | -   | - | -   |
| PNPLA3      | 1 | 1 | - | -   | - | -   | - | -   |
| PNPLA7      | 1 | 1 | - | -   | - | -   | - | -   |
| PNPO        | 1 | 2 | - | -   | - | -   | - | -   |
| PODXL       | 1 | 0 | - | -   | - | -   | - | -   |
| POLB        | 1 | 0 | - | Yes | - | -   | - | -   |
| POLD1       | 1 | 1 | - | Yes | - | -   | - | Yes |
| POLE3       | 1 | 0 | - | -   | - | -   | - | -   |
| POLI        | 1 | 1 | - | Yes | - | -   | - | -   |
| POLM        | 1 | 2 | - | -   | - | -   | - | -   |
| POLR1C      | 1 | 1 | - | -   | - | -   | - | -   |
| POLR2C      | 1 | 1 | - | -   | - | -   | - | -   |
| POLR3A      | 1 | 0 | - | -   | - | -   | - | -   |
| POLR3C      | 1 | 1 | - | -   | - | -   | - | -   |
| POLR3GL     | 1 | 0 | - | -   | - | -   | - | -   |
| POM121L12   | 1 | 1 | - | -   | - | -   | - | -   |
| POM121L2    | 1 | 2 | - | -   | - | -   | - | -   |
| POMGNT1     | 1 | 2 | - | -   | - | -   | - | -   |
| POMT1       | 1 | 0 | - | -   | - | -   | - | -   |
| POMZP3      | 1 | 0 | - | -   | - | -   | - | -   |
| POP1        | 1 | 1 | - | -   | - | -   | - | -   |
| POR         | 1 | 2 | - | -   | - | -   | - | -   |
| POSTN       | 1 | 3 | - | -   | - | -   | - | -   |
| POUSF2      | 1 | 0 | - | -   | - | -   | - | -   |
| PP2D1       | 1 | 0 | - | -   | - | -   | - | -   |
| PPAN-P2RY11 | 1 | 1 | - | -   | - | -   | - | -   |
| PPAP2A      | 1 | 0 | - | -   | - | -   | - | -   |
| PPAP2C      | 1 | 1 | - | -   | - | -   | - | -   |
| PPHLN1      | 1 | 2 | - | -   | - | -   | - | -   |
| PPIL4       | 1 | 0 | - | -   | - | -   | - | -   |
| PPM1E       | 1 | 1 | - | -   | - | -   | - | -   |
| PPM1M       | 1 | 0 | - | -   | - | -   | - | -   |
| PPOX        | 1 | 0 | - | -   | - | -   | - | -   |
| PPP1R12A    | 1 | 0 | - | -   | - | -   | - | -   |
| PPP1R13L    | 1 | 0 | - | -   | - | -   | - | -   |
| PPP1R17     | 1 | 1 | - | -   | - | -   | - | -   |
| PPP1R26     | 1 | 1 | - | -   | - | -   | - | -   |
| PPP1R32     | 1 | 1 | 1 | -   | - | -   | - | -   |
| PPP1R35     | 1 | 1 | - | -   | - | -   | - | -   |
| PPP1R36     | 1 | 0 | - | -   | - | -   | - | -   |
| PPP1R3A     | 1 | 1 | - | -   | - | -   | - | -   |
| PPP1R3E     | 1 | 0 | - | -   | - | -   | - | -   |
| PPP1R3G     | 1 | 2 | - | -   | - | -   | - | -   |
| PPP1R9B     | 1 | 0 | - | -   | - | -   | - | -   |
| PPP6R1      | 1 | 0 | - | -   | - | -   | - | -   |
| PRDM12      | 1 | 0 | - | -   | - | -   | - | -   |
| PRDM15      | 1 | 3 | - | -   | - | -   | - | -   |
| PRDM4       | 1 | 0 | - | -   | - | -   | - | -   |
| PRDM5       | 1 | 0 | - | -   | - | -   | - | -   |
| PRDX1       | 1 | 0 | - | -   | - | -   | - | -   |
| PREX1       | 1 | 0 | - | -   | - | -   | - | -   |
| PRG2        | 1 | 0 | - | -   | - | -   | - | -   |
| PRH2        | 1 | 0 | - | -   | - | -   | - | -   |
| PRICKLE4    | 1 | 0 | - | -   | - | -   | - | -   |
| PRKAA2      | 1 | 0 | - | -   | - | -   | - | -   |
| PRKACG      | 1 | 1 | - | -   | - | -   | - | -   |
| PRKD2       | 1 | 0 | 1 | -   | - | -   | - | -   |
| PRLR        | 1 | 0 | - | -   | - | -   | - | -   |
| PRM3        | 1 | 1 | - | -   | - | -   | - | -   |
| PRMT9       | 1 | 0 | - | -   | - | -   | - | -   |
| PRMT2       | 1 | 0 | - | -   | - | -   | - | -   |
| PRMT6       | 1 | 0 | - | Yes | - | -   | - | -   |
| PRMT7       | 1 | 0 | - | -   | - | -   | - | -   |
| PRODH2      | 1 | 0 | - | -   | - | -   | - | -   |
| PROM2       | 1 | 0 | - | -   | - | -   | - | -   |
| PROP1       | 1 | 0 | - | -   | - | -   | - | -   |
| PROS1       | 1 | 1 | - | -   | - | -   | - | -   |
| PROSC       | 1 | 2 | - | -   | - | -   | - | -   |
| PROSER1     | 1 | 0 | - | -   | - | -   | - | -   |
| PROX2       | 1 | 2 | 1 | -   | - | -   | - | -   |
| PROZ        | 1 | 1 | - | -   | - | -   | - | -   |
| PRPF40A     | 1 | 3 | - | -   | - | -   | - | -   |
| PRPF6       | 1 | 0 | 1 | -   | - | -   | - | -   |
| PRR18       | 1 | 0 | - | -   | - | -   | - | -   |
| PRR22       | 1 | 1 | - | -   | - | -   | - | -   |
| PRR25       | 1 | 1 | - | -   | - | -   | - | -   |
| PRR5        | 1 | 0 | - | -   | - | -   | - | -   |
| PRR5L       | 1 | 0 | - | -   | - | -   | - | -   |
| PRR9        | 1 | 0 | - | -   | - | -   | - | -   |
| PRRG3       | 1 | 0 | - | -   | - | -   | - | -   |
| PRRX2       | 1 | 0 | - | -   | - | -   | - | -   |
| PRSS23      | 1 | 0 | - | -   | - | -   | - | -   |
| PRSS35      | 1 | 0 | 1 | -   | - | -   | - | -   |
| PRSS36      | 1 | 0 | - | -   | - | -   | - | -   |
| PRSS37      | 1 | 0 | - | -   | - | -   | - | -   |
| PRSS45      | 1 | 1 | - | -   | - | -   | - | -   |
| PRSS53      | 1 | 3 | - | -   | - | -   | - | -   |
| PRSS55      | 1 | 0 | - | -   | - | -   | - | -   |
| PRSS56      | 1 | 0 | - | -   | - | -   | - | -   |
| PRSS57      | 1 | 3 | - | -   | - | -   | - | -   |
| PRTFDC1     | 1 | 1 | - | -   | - | -   | - | -   |

|          |   |   |   |     |     |   |   |     |   |
|----------|---|---|---|-----|-----|---|---|-----|---|
| PRTN3    | 1 | 1 | - | -   | -   | - | - | -   | - |
| PRUNE2   | 1 | 1 | 1 | -   | -   | - | - | -   | - |
| PSAPL1   | 1 | 1 | - | -   | -   | - | - | -   | - |
| PSD2     | 1 | 1 | - | -   | -   | - | - | -   | - |
| PSEN2    | 1 | 0 | - | -   | -   | - | - | -   | - |
| PSENE1   | 1 | 0 | - | -   | -   | - | - | -   | - |
| PSM48    | 1 | 0 | - | -   | -   | - | - | -   | - |
| PSMB2    | 1 | 0 | - | -   | -   | - | - | -   | - |
| PSMC4    | 1 | 0 | - | -   | -   | - | - | -   | - |
| PSMD8    | 1 | 0 | - | -   | -   | - | - | -   | - |
| PSMF1    | 1 | 0 | - | -   | -   | - | - | -   | - |
| PSMG3    | 1 | 0 | - | -   | -   | - | - | -   | - |
| PSTK     | 1 | 1 | 1 | -   | -   | - | - | -   | - |
| PTCD3    | 1 | 2 | - | -   | -   | - | - | -   | - |
| PTCHD3   | 1 | 2 | - | -   | -   | - | - | -   | - |
| PTER     | 1 | 1 | - | -   | -   | - | - | -   | - |
| PTGES2   | 1 | 0 | - | -   | -   | - | - | -   | - |
| PTGR1    | 1 | 1 | - | -   | -   | - | - | -   | - |
| PTGR2    | 1 | 0 | - | -   | -   | - | - | -   | - |
| HACD1    | 1 | 1 | - | -   | -   | - | - | -   | - |
| PTPMT1   | 1 | 0 | - | -   | -   | - | - | -   | - |
| PTPN12   | 1 | 0 | 1 | -   | -   | - | - | -   | - |
| PTPN21   | 1 | 3 | - | -   | -   | - | - | -   | - |
| PTPN23   | 1 | 0 | - | -   | -   | - | - | -   | - |
| PTPN4    | 1 | 0 | - | -   | -   | - | - | -   | - |
| PTPN7    | 1 | 0 | - | -   | -   | - | - | -   | - |
| PTPRC    | 1 | 1 | - | -   | -   | - | - | -   | - |
| PTPRE    | 1 | 0 | - | -   | -   | - | - | -   | - |
| PTPRM    | 1 | 0 | - | -   | -   | - | - | -   | - |
| PTPRQ    | 1 | 0 | - | -   | -   | - | - | -   | - |
| PTPRU    | 1 | 1 | - | -   | -   | - | - | -   | - |
| PTPRZ1   | 1 | 0 | - | -   | -   | - | - | -   | - |
| PTX4     | 1 | 1 | - | -   | -   | - | - | -   | - |
| PUS7     | 1 | 0 | - | -   | -   | - | - | -   | - |
| PUSL1    | 1 | 0 | - | -   | -   | - | - | -   | - |
| PXD1     | 1 | 1 | 1 | -   | -   | - | - | -   | - |
| PXDNL    | 1 | 0 | 2 | -   | -   | - | - | -   | - |
| PYCRL    | 1 | 0 | - | -   | -   | - | - | -   | - |
| PYDC1    | 1 | 1 | - | -   | -   | - | - | -   | - |
| PYGL     | 1 | 1 | - | -   | -   | - | - | -   | - |
| PYG01    | 1 | 0 | 1 | -   | -   | - | - | -   | - |
| PYHIN1   | 1 | 2 | - | -   | -   | - | - | -   | - |
| PYROXD1  | 1 | 1 | - | -   | -   | - | - | -   | - |
| PYROXD2  | 1 | 4 | - | -   | -   | - | - | -   | - |
| QPCT     | 1 | 0 | - | -   | -   | - | - | -   | - |
| QRFPR    | 1 | 0 | - | -   | -   | - | - | -   | - |
| QRICH2   | 1 | 0 | - | -   | -   | - | - | -   | - |
| QTRTD1   | 1 | 0 | - | -   | -   | - | - | -   | - |
| R3HCC1   | 1 | 0 | - | -   | -   | - | - | -   | - |
| R3HCC1L  | 1 | 3 | - | -   | -   | - | - | -   | - |
| RAB17    | 1 | 0 | - | -   | -   | - | - | -   | - |
| RAB34    | 1 | 1 | - | -   | -   | - | - | -   | - |
| RAB39A   | 1 | 0 | - | -   | -   | - | - | -   | - |
| RAB3GAP1 | 1 | 0 | - | -   | -   | - | - | -   | - |
| RAB3GAP2 | 1 | 1 | - | -   | -   | - | - | -   | - |
| RAB3L1   | 1 | 0 | - | -   | -   | - | - | -   | - |
| RAB44    | 1 | 0 | - | -   | -   | - | - | -   | - |
| RABEP2   | 1 | 0 | - | -   | -   | - | - | -   | - |
| RABL3    | 1 | 0 | - | -   | -   | - | - | -   | - |
| RAD1     | 1 | 2 | - | Yes | -   | - | - | -   | - |
| RAD17    | 1 | 0 | - | Yes | -   | - | - | -   | - |
| RAD18    | 1 | 0 | - | Yes | -   | - | - | -   | - |
| RAD51AP2 | 1 | 0 | - | -   | -   | - | - | -   | - |
| RAD54B   | 1 | 3 | - | Yes | -   | - | - | -   | - |
| RADIL    | 1 | 1 | 1 | -   | -   | - | - | -   | - |
| RAG1     | 1 | 1 | 1 | -   | -   | - | - | -   | - |
| RAI1     | 1 | 0 | - | -   | -   | - | - | -   | - |
| RALYL    | 1 | 0 | - | -   | -   | - | - | -   | - |
| RANBP2   | 1 | 0 | - | -   | -   | - | - | -   | - |
| RANBP6   | 1 | 1 | - | -   | -   | - | - | -   | - |
| RAP1A    | 1 | 0 | - | -   | -   | - | - | -   | - |
| RAP1GDS1 | 1 | 0 | - | -   | -   | - | - | -   | - |
| RARG     | 1 | 0 | - | -   | -   | - | - | -   | - |
| RARS2    | 1 | 4 | - | -   | -   | - | - | -   | - |
| RASAL3   | 1 | 0 | 1 | -   | -   | - | - | -   | - |
| RASEF    | 1 | 0 | - | -   | -   | - | - | -   | - |
| RASGRF1  | 1 | 0 | - | Yes | -   | - | - | -   | - |
| RASGRF2  | 1 | 0 | - | -   | -   | - | - | -   | - |
| RASL10A  | 1 | 1 | - | -   | -   | - | - | -   | - |
| RASSF1   | 1 | 1 | - | Yes | -   | - | - | -   | - |
| RASSF2   | 1 | 0 | - | -   | -   | - | - | -   | - |
| RASSF4   | 1 | 1 | - | -   | -   | - | - | -   | - |
| RASSF6   | 1 | 0 | - | -   | -   | - | - | -   | - |
| RASSF7   | 1 | 0 | - | -   | -   | - | - | -   | - |
| RB1      | 1 | 0 | 1 | Yes | Yes | - | - | Yes | - |
| RBBP8    | 1 | 0 | - | Yes | -   | - | - | -   | - |
| RBCK1    | 1 | 0 | - | -   | -   | - | - | -   | - |
| RBFA     | 1 | 1 | - | -   | -   | - | - | -   | - |
| RBKS     | 1 | 2 | - | -   | -   | - | - | -   | - |
| RBM14    | 1 | 0 | - | Yes | -   | - | - | -   | - |
| RBM23    | 1 | 2 | - | -   | -   | - | - | -   | - |
| RBM28    | 1 | 0 | - | -   | -   | - | - | -   | - |
| RBM44    | 1 | 2 | - | -   | -   | - | - | -   | - |
| RBMS1    | 1 | 1 | - | -   | -   | - | - | -   | - |
| RBMY     | 1 | 2 | - | -   | -   | - | - | -   | - |
| RCBTB1   | 1 | 1 | - | -   | -   | - | - | -   | - |
| RCBTB2   | 1 | 1 | - | -   | -   | - | - | -   | - |
| RCOR2    | 1 | 0 | - | -   | -   | - | - | -   | - |
| RCS1     | 1 | 0 | - | -   | -   | - | - | -   | - |
| RDH13    | 1 | 0 | - | -   | -   | - | - | -   | - |
| RECQL    | 1 | 2 | 1 | Yes | -   | - | - | -   | - |
| RECQL5   | 1 | 1 | - | Yes | -   | - | - | -   | - |
| REG4     | 1 | 0 | - | -   | -   | - | - | -   | - |
| REM2     | 1 | 1 | - | -   | -   | - | - | -   | - |
| RENB1    | 1 | 0 | - | -   | -   | - | - | -   | - |
| REPS2    | 1 | 0 | - | -   | -   | - | - | -   | - |

|           |   |   |   |     |   |   |   |   |   |
|-----------|---|---|---|-----|---|---|---|---|---|
| RERGL     | 1 | 1 | - | -   | - | - | - | - | - |
| RESP18    | 1 | 0 | - | -   | - | - | - | - | - |
| REST      | 1 | 1 | - | -   | - | - | - | - | - |
| RFC2      | 1 | 0 | - | Yes | - | - | - | - | - |
| RFC3      | 1 | 0 | - | Yes | - | - | - | - | - |
| RFIG      | 1 | 2 | - | -   | - | - | - | - | - |
| RFL4B     | 1 | 1 | - | -   | - | - | - | - | - |
| RFTN2     | 1 | 0 | - | -   | - | - | - | - | - |
| RFX2      | 1 | 0 | - | -   | - | - | - | - | - |
| RFX3      | 1 | 2 | - | -   | - | - | - | - | - |
| RFX8      | 1 | 1 | - | -   | - | - | - | - | - |
| RFXANK    | 1 | 0 | - | -   | - | - | - | - | - |
| RGL3      | 1 | 0 | - | -   | - | - | - | - | - |
| RGL4      | 1 | 2 | - | -   | - | - | - | - | - |
| RGMA      | 1 | 0 | - | -   | - | - | - | - | - |
| RGMB      | 1 | 0 | - | -   | - | - | - | - | - |
| RGS11     | 1 | 1 | - | -   | - | - | - | - | - |
| RGS13     | 1 | 0 | - | -   | - | - | - | - | - |
| RGS18     | 1 | 1 | - | -   | - | - | - | - | - |
| RGS20     | 1 | 0 | 1 | -   | - | - | - | - | - |
| RGSL1     | 1 | 2 | - | -   | - | - | - | - | - |
| RHBDD2    | 1 | 0 | - | -   | - | - | - | - | - |
| RHBDF1    | 1 | 0 | - | -   | - | - | - | - | - |
| RHOBTB1   | 1 | 0 | - | -   | - | - | - | - | - |
| RHOBTB3   | 1 | 1 | - | -   | - | - | - | - | - |
| RHOD      | 1 | 0 | - | -   | - | - | - | - | - |
| RHPN1     | 1 | 0 | - | -   | - | - | - | - | - |
| RHAD1     | 1 | 0 | - | -   | - | - | - | - | - |
| RIMKLB    | 1 | 0 | - | -   | - | - | - | - | - |
| RINT1     | 1 | 2 | - | -   | - | - | - | - | - |
| RIOK2     | 1 | 0 | - | -   | - | - | - | - | - |
| RIPK2     | 1 | 0 | - | -   | - | - | - | - | - |
| RIPK4     | 1 | 2 | - | -   | - | - | - | - | - |
| RIPPLY2   | 1 | 0 | - | -   | - | - | - | - | - |
| RIT1      | 1 | 0 | - | -   | - | - | - | - | - |
| RLN1      | 1 | 0 | - | -   | - | - | - | - | - |
| RLTPR     | 1 | 1 | - | -   | - | - | - | - | - |
| RMDN2     | 1 | 0 | - | -   | - | - | - | - | - |
| RNASE2    | 1 | 1 | - | -   | - | - | - | - | - |
| RNASE4    | 1 | 0 | - | -   | - | - | - | - | - |
| RNASE6    | 1 | 0 | - | -   | - | - | - | - | - |
| RNASEH2B  | 1 | 0 | - | -   | - | - | - | - | - |
| RNF115    | 1 | 0 | - | -   | - | - | - | - | - |
| RNF13     | 1 | 0 | - | -   | - | - | - | - | - |
| RNF145    | 1 | 0 | - | -   | - | - | - | - | - |
| RNF148    | 1 | 0 | - | -   | - | - | - | - | - |
| RNF166    | 1 | 0 | - | -   | - | - | - | - | - |
| RNF168    | 1 | 0 | 1 | Yes | - | - | - | - | - |
| RNF17     | 1 | 1 | 1 | -   | - | - | - | - | - |
| RNF181    | 1 | 0 | - | -   | - | - | - | - | - |
| RNF183    | 1 | 0 | - | -   | - | - | - | - | - |
| RNF186    | 1 | 0 | - | -   | - | - | - | - | - |
| RNF20     | 1 | 0 | - | -   | - | - | - | - | - |
| RNF212    | 1 | 2 | - | -   | - | - | - | - | - |
| RNF217    | 1 | 1 | - | -   | - | - | - | - | - |
| RNF219    | 1 | 0 | - | -   | - | - | - | - | - |
| RNF224    | 1 | 0 | - | -   | - | - | - | - | - |
| RNF24     | 1 | 0 | - | -   | - | - | - | - | - |
| RNF25     | 1 | 0 | - | -   | - | - | - | - | - |
| RNF4      | 1 | 0 | - | -   | - | - | - | - | - |
| RNF40     | 1 | 0 | - | -   | - | - | - | - | - |
| RNF6      | 1 | 1 | - | -   | - | - | - | - | - |
| RNGTT     | 1 | 0 | - | -   | - | - | - | - | - |
| ROBO1     | 1 | 4 | - | -   | - | - | - | - | - |
| ROGDI     | 1 | 1 | - | -   | - | - | - | - | - |
| ROM1      | 1 | 0 | - | -   | - | - | - | - | - |
| ROPN1B    | 1 | 1 | - | -   | - | - | - | - | - |
| ROS1      | 1 | 1 | - | -   | - | - | - | - | - |
| RP1       | 1 | 2 | 1 | -   | - | - | - | - | - |
| RPAP1     | 1 | 1 | - | -   | - | - | - | - | - |
| RPAP2     | 1 | 1 | - | -   | - | - | - | - | - |
| RPAP3     | 1 | 0 | - | -   | - | - | - | - | - |
| RPGRIPL   | 1 | 2 | - | -   | - | - | - | - | - |
| RPH3A     | 1 | 1 | - | -   | - | - | - | - | - |
| RPL27     | 1 | 0 | - | -   | - | - | - | - | - |
| RPL28     | 1 | 1 | - | -   | - | - | - | - | - |
| RPP25     | 1 | 0 | - | -   | - | - | - | - | - |
| RPP25L    | 1 | 0 | - | -   | - | - | - | - | - |
| RPS6KB2   | 1 | 0 | - | -   | - | - | - | - | - |
| RPTN      | 1 | 0 | - | -   | - | - | - | - | - |
| RPUSD3    | 1 | 0 | - | -   | - | - | - | - | - |
| RRAD      | 1 | 0 | - | Yes | - | - | - | - | - |
| RRAGC     | 1 | 0 | - | -   | - | - | - | - | - |
| RRH       | 1 | 1 | - | -   | - | - | - | - | - |
| RRM2      | 1 | 0 | - | -   | - | - | - | - | - |
| RRNAD1    | 1 | 1 | - | -   | - | - | - | - | - |
| RRP1      | 1 | 1 | - | -   | - | - | - | - | - |
| RRP12     | 1 | 0 | - | -   | - | - | - | - | - |
| RRP1B     | 1 | 1 | - | -   | - | - | - | - | - |
| RRP8      | 1 | 1 | - | -   | - | - | - | - | - |
| RSBN1     | 1 | 0 | - | -   | - | - | - | - | - |
| RSPH1     | 1 | 2 | - | -   | - | - | - | - | - |
| RSPH10B   | 1 | 0 | - | -   | - | - | - | - | - |
| RSPH64    | 1 | 1 | - | -   | - | - | - | - | - |
| RTF1      | 1 | 0 | - | -   | - | - | - | - | - |
| RTKN2     | 1 | 0 | - | -   | - | - | - | - | - |
| RTN3      | 1 | 1 | - | -   | - | - | - | - | - |
| RTP2      | 1 | 1 | - | -   | - | - | - | - | - |
| RUNDC1    | 1 | 0 | 1 | -   | - | - | - | - | - |
| RUSC1-AS1 | 1 | 0 | - | -   | - | - | - | - | - |
| RWDD4     | 1 | 0 | - | -   | - | - | - | - | - |
| RXFP2     | 1 | 0 | - | -   | - | - | - | - | - |
| RXFP3     | 1 | 1 | - | -   | - | - | - | - | - |
| S100A14   | 1 | 0 | - | -   | - | - | - | - | - |
| S100A2    | 1 | 0 | - | -   | - | - | - | - | - |
| SAMD15    | 1 | 0 | 1 | -   | - | - | - | - | - |

|           |   |   |   |     |   |   |   |   |     |   |
|-----------|---|---|---|-----|---|---|---|---|-----|---|
| SAMD3     | 1 | 2 | - | -   | - | - | - | - | -   | - |
| SAMD9     | 1 | 3 | - | -   | - | - | - | - | -   | - |
| SAMM50    | 1 | 1 | - | -   | - | - | - | - | -   | - |
| SAP18     | 1 | 0 | - | -   | - | - | - | - | -   | - |
| SAP25     | 1 | 0 | - | -   | - | - | - | - | -   | - |
| SAR1B     | 1 | 1 | - | -   | - | - | - | - | -   | - |
| SARDH     | 1 | 1 | - | -   | - | - | - | - | -   | - |
| SASS6     | 1 | 1 | - | -   | - | - | - | - | -   | - |
| SATL1     | 1 | 0 | - | -   | - | - | - | - | -   | - |
| SBF2      | 1 | 1 | 1 | -   | - | - | - | - | -   | - |
| SBNO1     | 1 | 0 | - | -   | - | - | - | - | -   | - |
| SBNO2     | 1 | 0 | - | -   | - | - | - | - | -   | - |
| SBSN      | 1 | 0 | - | -   | - | - | - | - | -   | - |
| SCAF1     | 1 | 0 | - | -   | - | - | - | - | -   | - |
| SCAF4     | 1 | 0 | 1 | -   | - | - | - | - | -   | - |
| SCAMP3    | 1 | 0 | - | -   | - | - | - | - | -   | - |
| ZBED9     | 1 | 0 | - | -   | - | - | - | - | -   | - |
| SCAP      | 1 | 2 | - | -   | - | - | - | - | -   | - |
| SCCPDH    | 1 | 0 | - | -   | - | - | - | - | -   | - |
| SCEL      | 1 | 0 | - | -   | - | - | - | - | -   | - |
| SCG3      | 1 | 0 | - | -   | - | - | - | - | -   | - |
| SCG5      | 1 | 0 | - | -   | - | - | - | - | -   | - |
| SCGB1C1   | 1 | 1 | - | -   | - | - | - | - | -   | - |
| SCGB1D2   | 1 | 0 | - | -   | - | - | - | - | -   | - |
| SCN2B     | 1 | 0 | - | -   | - | - | - | - | -   | - |
| SCN7A     | 1 | 3 | - | -   | - | - | - | - | -   | - |
| SCO1      | 1 | 2 | - | -   | - | - | - | - | -   | - |
| SCO2      | 1 | 2 | - | -   | - | - | - | - | -   | - |
| SCPEP1    | 1 | 1 | - | -   | - | - | - | - | -   | - |
| SCT       | 1 | 0 | - | -   | - | - | - | - | -   | - |
| SCTR      | 1 | 1 | - | -   | - | - | - | - | -   | - |
| SDCCAG3   | 1 | 0 | - | -   | - | - | - | - | -   | - |
| SDF2L1    | 1 | 0 | - | -   | - | - | - | - | -   | - |
| SDF4      | 1 | 0 | 1 | -   | - | - | - | - | -   | - |
| SDHB      | 1 | 0 | - | -   | - | - | - | - | Yes | - |
| SDHC      | 1 | 2 | - | -   | - | - | - | - | Yes | - |
| SDK2      | 1 | 0 | - | -   | - | - | - | - | -   | - |
| SEBOX     | 1 | 1 | - | -   | - | - | - | - | -   | - |
| SEC14L2   | 1 | 0 | - | -   | - | - | - | - | -   | - |
| SEC14L4   | 1 | 1 | - | -   | - | - | - | - | -   | - |
| SEC14L5   | 1 | 2 | - | -   | - | - | - | - | -   | - |
| SEC16B    | 1 | 0 | - | -   | - | - | - | - | -   | - |
| SEC23IP   | 1 | 0 | - | -   | - | - | - | - | -   | - |
| SEC24A    | 1 | 0 | 1 | -   | - | - | - | - | -   | - |
| SEC31B    | 1 | 3 | - | -   | - | - | - | - | -   | - |
| SECTM1    | 1 | 0 | - | -   | - | - | - | - | -   | - |
| SELENBP1  | 1 | 0 | - | -   | - | - | - | - | -   | - |
| SELL      | 1 | 0 | - | -   | - | - | - | - | -   | - |
| SELP      | 1 | 1 | - | -   | - | - | - | - | -   | - |
| SEM43E    | 1 | 1 | - | -   | - | - | - | - | -   | - |
| SEM44A    | 1 | 0 | - | -   | - | - | - | - | -   | - |
| SEM44F    | 1 | 1 | - | -   | - | - | - | - | -   | - |
| SENP5     | 1 | 0 | - | -   | - | - | - | - | -   | - |
| SEPN1     | 1 | 0 | - | -   | - | - | - | - | -   | - |
| SEPP1     | 1 | 1 | - | -   | - | - | - | - | -   | - |
| SEPW1     | 1 | 0 | - | -   | - | - | - | - | -   | - |
| SERHL2    | 1 | 3 | - | -   | - | - | - | - | -   | - |
| SERINC3   | 1 | 0 | - | -   | - | - | - | - | -   | - |
| SERPINA12 | 1 | 0 | - | -   | - | - | - | - | -   | - |
| SERPINA3  | 1 | 0 | - | -   | - | - | - | - | -   | - |
| SERPINB13 | 1 | 1 | - | -   | - | - | - | - | -   | - |
| SERPINB5  | 1 | 2 | - | -   | - | - | - | - | -   | - |
| SERPINB6  | 1 | 0 | - | -   | - | - | - | - | -   | - |
| SERPINB8  | 1 | 0 | - | -   | - | - | - | - | -   | - |
| SERPINI2  | 1 | 2 | - | -   | - | - | - | - | -   | - |
| SETD1B    | 1 | 1 | - | -   | - | - | - | - | -   | - |
| SETD4     | 1 | 2 | - | -   | - | - | - | - | -   | - |
| SETD9     | 1 | 0 | - | -   | - | - | - | - | -   | - |
| SETDB1    | 1 | 1 | 1 | -   | - | - | - | - | -   | - |
| SEZ6L2    | 1 | 0 | - | -   | - | - | - | - | -   | - |
| SFT2D2    | 1 | 0 | - | -   | - | - | - | - | -   | - |
| SFTPD     | 1 | 2 | - | -   | - | - | - | - | -   | - |
| SFXN5     | 1 | 1 | - | -   | - | - | - | - | -   | - |
| SGK223    | 1 | 1 | - | -   | - | - | - | - | -   | - |
| SGK3      | 1 | 1 | - | -   | - | - | - | - | -   | - |
| SGSM3     | 1 | 0 | - | -   | - | - | - | - | -   | - |
| SH2D2A    | 1 | 0 | - | -   | - | - | - | - | -   | - |
| SH2D3A    | 1 | 0 | - | -   | - | - | - | - | -   | - |
| SH3BGRL   | 1 | 0 | - | -   | - | - | - | - | -   | - |
| SH3BGRL3  | 1 | 0 | - | -   | - | - | - | - | -   | - |
| SH3BP2    | 1 | 0 | - | -   | - | - | - | - | -   | - |
| SH3BP4    | 1 | 1 | - | -   | - | - | - | - | -   | - |
| SH3D21    | 1 | 2 | - | -   | - | - | - | - | -   | - |
| SH3GLB1   | 1 | 0 | - | -   | - | - | - | - | -   | - |
| SH3PXD2B  | 1 | 1 | - | -   | - | - | - | - | -   | - |
| SH3RF3    | 1 | 1 | - | -   | - | - | - | - | -   | - |
| SH3TC1    | 1 | 1 | - | -   | - | - | - | - | -   | - |
| SH3YL1    | 1 | 1 | - | -   | - | - | - | - | -   | - |
| SHANK2    | 1 | 0 | - | -   | - | - | - | - | -   | - |
| SHBG      | 1 | 1 | - | -   | - | - | - | - | -   | - |
| SHCBP1L   | 1 | 3 | - | -   | - | - | - | - | -   | - |
| SHD       | 1 | 0 | - | -   | - | - | - | - | -   | - |
| SHF       | 1 | 0 | - | -   | - | - | - | - | -   | - |
| SHISA5    | 1 | 0 | - | -   | - | - | - | - | -   | - |
| SHMT1     | 1 | 0 | - | -   | - | - | - | - | -   | - |
| SHPK      | 1 | 1 | - | -   | - | - | - | - | -   | - |
| SHPRH     | 1 | 0 | - | Yes | - | - | - | - | -   | - |
| SHROOM1   | 1 | 0 | - | -   | - | - | - | - | -   | - |
| SI        | 1 | 2 | - | -   | - | - | - | - | -   | - |
| SIAH2     | 1 | 0 | - | -   | - | - | - | - | -   | - |
| SIAH3     | 1 | 0 | 1 | -   | - | - | - | - | -   | - |
| SIDT1     | 1 | 0 | - | -   | - | - | - | - | -   | - |
| SIGLEC1   | 1 | 2 | - | -   | - | - | - | - | -   | - |
| SIGLEC10  | 1 | 1 | - | -   | - | - | - | - | -   | - |
| SIGLEC12  | 1 | 2 | - | -   | - | - | - | - | -   | - |
| SIGLEC6   | 1 | 2 | 1 | -   | - | - | - | - | -   | - |

|          |   |   |   |   |   |   |   |   |   |
|----------|---|---|---|---|---|---|---|---|---|
| SIGLEC8  | 1 | 2 | - | - | - | - | - | - | - |
| SIGLEC9  | 1 | 2 | - | - | - | - | - | - | - |
| SIPA1L3  | 1 | 0 | - | - | - | - | - | - | - |
| SIRPB1   | 1 | 0 | - | - | - | - | - | - | - |
| SIRPG    | 1 | 0 | - | - | - | - | - | - | - |
| SKA1     | 1 | 0 | - | - | - | - | - | - | - |
| SKIV2L2  | 1 | 2 | - | - | - | - | - | - | - |
| SLA2     | 1 | 0 | - | - | - | - | - | - | - |
| SLAIN1   | 1 | 0 | - | - | - | - | - | - | - |
| SLAMP6   | 1 | 0 | - | - | - | - | - | - | - |
| SLAMP8   | 1 | 1 | - | - | - | - | - | - | - |
| SLC12A9  | 1 | 2 | - | - | - | - | - | - | - |
| SLC13A1  | 1 | 2 | - | - | - | - | - | - | - |
| SLC13A2  | 1 | 1 | - | - | - | - | - | - | - |
| SLC13A5  | 1 | 0 | - | - | - | - | - | - | - |
| SLC14A2  | 1 | 2 | 1 | - | - | - | - | - | - |
| SLC15A2  | 1 | 1 | - | - | - | - | - | - | - |
| SLC15A3  | 1 | 1 | 1 | - | - | - | - | - | - |
| SLC15A4  | 1 | 0 | - | - | - | - | - | - | - |
| SLC16A7  | 1 | 1 | - | - | - | - | - | - | - |
| SLC17A3  | 1 | 0 | - | - | - | - | - | - | - |
| SLC17A8  | 1 | 1 | - | - | - | - | - | - | - |
| SLC17A9  | 1 | 0 | - | - | - | - | - | - | - |
| SLC18A1  | 1 | 0 | 1 | - | - | - | - | - | - |
| SLC18A2  | 1 | 0 | - | - | - | - | - | - | - |
| SLC19A1  | 1 | 0 | - | - | - | - | - | - | - |
| SLC1A1   | 1 | 0 | - | - | - | - | - | - | - |
| SLC22A13 | 1 | 1 | - | - | - | - | - | - | - |
| SLC22A18 | 1 | 0 | - | - | - | - | - | - | - |
| SLC22A24 | 1 | 0 | - | - | - | - | - | - | - |
| SLC22A25 | 1 | 3 | - | - | - | - | - | - | - |
| SLC22A6  | 1 | 0 | - | - | - | - | - | - | - |
| SLC23A3  | 1 | 0 | 1 | - | - | - | - | - | - |
| SLC25A10 | 1 | 0 | - | - | - | - | - | - | - |
| SLC25A13 | 1 | 0 | - | - | - | - | - | - | - |
| SLC25A18 | 1 | 0 | - | - | - | - | - | - | - |
| SLC25A2  | 1 | 0 | - | - | - | - | - | - | - |
| SLC25A24 | 1 | 2 | - | - | - | - | - | - | - |
| SLC25A34 | 1 | 0 | - | - | - | - | - | - | - |
| SLC25A41 | 1 | 0 | - | - | - | - | - | - | - |
| SLC25A45 | 1 | 0 | - | - | - | - | - | - | - |
| SLC25A48 | 1 | 1 | - | - | - | - | - | - | - |
| SLC26A1  | 1 | 1 | - | - | - | - | - | - | - |
| SLC26A11 | 1 | 1 | - | - | - | - | - | - | - |
| SLC26A2  | 1 | 1 | - | - | - | - | - | - | - |
| SLC26A3  | 1 | 1 | - | - | - | - | - | - | - |
| SLC26A9  | 1 | 1 | - | - | - | - | - | - | - |
| SLC27A6  | 1 | 1 | 1 | - | - | - | - | - | - |
| SLC2A11  | 1 | 1 | - | - | - | - | - | - | - |
| SLC2A3   | 1 | 0 | - | - | - | - | - | - | - |
| SLC2A5   | 1 | 0 | - | - | - | - | - | - | - |
| SLC2A8   | 1 | 0 | - | - | - | - | - | - | - |
| SLC30A6  | 1 | 0 | - | - | - | - | - | - | - |
| SLC31A2  | 1 | 0 | - | - | - | - | - | - | - |
| SLC34A1  | 1 | 1 | 1 | - | - | - | - | - | - |
| SLC35B3  | 1 | 0 | - | - | - | - | - | - | - |
| SLC35C2  | 1 | 1 | - | - | - | - | - | - | - |
| SLC35E4  | 1 | 1 | - | - | - | - | - | - | - |
| SLC35F2  | 1 | 0 | - | - | - | - | - | - | - |
| SLC35F4  | 1 | 1 | - | - | - | - | - | - | - |
| SLC36A2  | 1 | 2 | - | - | - | - | - | - | - |
| SLC36A4  | 1 | 0 | - | - | - | - | - | - | - |
| SLC37A3  | 1 | 1 | - | - | - | - | - | - | - |
| SLC39A1  | 1 | 0 | - | - | - | - | - | - | - |
| SLC39A2  | 1 | 2 | - | - | - | - | - | - | - |
| SLC39A8  | 1 | 0 | - | - | - | - | - | - | - |
| SLC3A1   | 1 | 3 | - | - | - | - | - | - | - |
| SLC41A2  | 1 | 0 | - | - | - | - | - | - | - |
| SLC41A3  | 1 | 0 | - | - | - | - | - | - | - |
| SLC44A3  | 1 | 0 | - | - | - | - | - | - | - |
| SLC46A1  | 1 | 0 | 1 | - | - | - | - | - | - |
| SLC47A2  | 1 | 1 | - | - | - | - | - | - | - |
| SLC5A10  | 1 | 4 | 1 | - | - | - | - | - | - |
| SLC5A6   | 1 | 1 | - | - | - | - | - | - | - |
| SLC6A16  | 1 | 0 | - | - | - | - | - | - | - |
| SLC6A18  | 1 | 3 | - | - | - | - | - | - | - |
| SLC7A13  | 1 | 0 | - | - | - | - | - | - | - |
| SLC7A4   | 1 | 0 | - | - | - | - | - | - | - |
| SLC7A5   | 1 | 0 | - | - | - | - | - | - | - |
| SLC9A3R1 | 1 | 1 | - | - | - | - | - | - | - |
| SLC9A5   | 1 | 1 | - | - | - | - | - | - | - |
| SLC9A9   | 1 | 1 | - | - | - | - | - | - | - |
| SLC9C1   | 1 | 0 | - | - | - | - | - | - | - |
| SLC9C2   | 1 | 0 | - | - | - | - | - | - | - |
| SLCO1A2  | 1 | 1 | - | - | - | - | - | - | - |
| SLCO1C1  | 1 | 0 | 1 | - | - | - | - | - | - |
| SLCO4C1  | 1 | 0 | - | - | - | - | - | - | - |
| SLCO6A1  | 1 | 1 | - | - | - | - | - | - | - |
| SLFN12L  | 1 | 2 | - | - | - | - | - | - | - |
| SLFN14   | 1 | 0 | - | - | - | - | - | - | - |
| SLFN5    | 1 | 0 | - | - | - | - | - | - | - |
| SLIRP    | 1 | 0 | - | - | - | - | - | - | - |
| SLIT3    | 1 | 1 | 1 | - | - | - | - | - | - |
| SLPI     | 1 | 0 | - | - | - | - | - | - | - |
| SLX4     | 1 | 0 | - | - | - | - | - | - | - |
| SMAP1    | 1 | 0 | - | - | - | - | - | - | - |
| SMC5     | 1 | 0 | - | - | - | - | - | - | - |
| SMC6     | 1 | 2 | - | - | - | - | - | - | - |
| SMCO2    | 1 | 0 | - | - | - | - | - | - | - |
| SMCP     | 1 | 0 | - | - | - | - | - | - | - |
| MIEF2    | 1 | 1 | - | - | - | - | - | - | - |
| SMCR8    | 1 | 0 | - | - | - | - | - | - | - |
| SMG1     | 1 | 1 | 3 | - | - | - | - | - | - |
| SMIM12   | 1 | 0 | - | - | - | - | - | - | - |
| SMTN     | 1 | 1 | - | - | - | - | - | - | - |
| SMTNL1   | 1 | 0 | - | - | - | - | - | - | - |



|          |   |   |   |     |   |   |   |     |   |
|----------|---|---|---|-----|---|---|---|-----|---|
| SVIL     | 1 | 1 | - | -   | - | - | - | -   | - |
| SVOPL    | 1 | 1 | - | -   | - | - | - | -   | - |
| SYCN     | 1 | 0 | - | -   | - | - | - | -   | - |
| SYCP2L   | 1 | 0 | - | -   | - | - | - | -   | - |
| SYDE2    | 1 | 2 | - | -   | - | - | - | -   | - |
| SYK      | 1 | 0 | - | -   | - | - | - | -   | - |
| SYMPK    | 1 | 0 | - | -   | - | - | - | -   | - |
| SYN3     | 1 | 0 | - | -   | - | - | - | -   | - |
| SYNC     | 1 | 0 | - | -   | - | - | - | -   | - |
| SYNE1    | 1 | 4 | 2 | -   | - | - | - | -   | - |
| SYNE2    | 1 | 7 | - | -   | - | - | - | -   | - |
| SYNE4    | 1 | 0 | - | -   | - | - | - | -   | - |
| SYNGR4   | 1 | 1 | - | -   | - | - | - | -   | - |
| SYNJ1    | 1 | 1 | 1 | -   | - | - | - | -   | - |
| SYNPO2   | 1 | 1 | - | -   | - | - | - | -   | - |
| SYNPO2L  | 1 | 1 | - | -   | - | - | - | -   | - |
| SYPL2    | 1 | 0 | - | -   | - | - | - | -   | - |
| SYT17    | 1 | 0 | - | -   | - | - | - | -   | - |
| SYT3     | 1 | 0 | - | -   | - | - | - | -   | - |
| SYT8     | 1 | 1 | - | -   | - | - | - | -   | - |
| SYTL1    | 1 | 0 | - | -   | - | - | - | -   | - |
| SYTL3    | 1 | 2 | - | -   | - | - | - | -   | - |
| SYTL4    | 1 | 0 | - | -   | - | - | - | -   | - |
| TAAR1    | 1 | 1 | - | -   | - | - | - | -   | - |
| TAAR5    | 1 | 0 | - | -   | - | - | - | -   | - |
| TAC3     | 1 | 0 | - | -   | - | - | - | -   | - |
| TACR1    | 1 | 0 | - | -   | - | - | - | -   | - |
| TAD42A   | 1 | 1 | - | -   | - | - | - | -   | - |
| TAD43    | 1 | 0 | - | -   | - | - | - | -   | - |
| TAF1A    | 1 | 1 | - | -   | - | - | - | -   | - |
| TAF1B    | 1 | 1 | - | -   | - | - | - | -   | - |
| TAF1D    | 1 | 1 | - | -   | - | - | - | -   | - |
| TAF6L    | 1 | 1 | - | -   | - | - | - | -   | - |
| TANK     | 1 | 0 | 1 | -   | - | - | - | -   | - |
| TARP     | 1 | 0 | - | -   | - | - | - | -   | - |
| TARS     | 1 | 0 | - | -   | - | - | - | -   | - |
| TAS1R1   | 1 | 0 | 1 | -   | - | - | - | -   | - |
| TAS2R10  | 1 | 0 | - | -   | - | - | - | -   | - |
| TAS2R19  | 1 | 0 | - | -   | - | - | - | -   | - |
| TAS2R3   | 1 | 0 | - | -   | - | - | - | -   | - |
| TBC1D17  | 1 | 0 | - | -   | - | - | - | -   | - |
| TBC1D26  | 1 | 0 | - | -   | - | - | - | -   | - |
| TBC1D4   | 1 | 1 | - | -   | - | - | - | -   | - |
| TBCCD1   | 1 | 0 | - | -   | - | - | - | -   | - |
| TBCD     | 1 | 0 | - | -   | - | - | - | -   | - |
| TBL1X    | 1 | 0 | - | -   | - | - | - | -   | - |
| TBPL2    | 1 | 0 | - | -   | - | - | - | -   | - |
| TCEB3B   | 1 | 0 | - | -   | - | - | - | -   | - |
| TCF3     | 1 | 1 | - | -   | - | - | - | -   | - |
| TCHHL1   | 1 | 0 | - | -   | - | - | - | -   | - |
| TCHP     | 1 | 2 | - | Yes | - | - | - | -   | - |
| TCN1     | 1 | 0 | - | -   | - | - | - | -   | - |
| TCP10L2  | 1 | 0 | - | -   | - | - | - | -   | - |
| TCP11L2  | 1 | 2 | - | -   | - | - | - | -   | - |
| TCTE1    | 1 | 0 | - | -   | - | - | - | -   | - |
| TCTEX1D4 | 1 | 2 | - | -   | - | - | - | -   | - |
| TCTN3    | 1 | 3 | - | -   | - | - | - | -   | - |
| TDP1     | 1 | 0 | - | Yes | - | - | - | -   | - |
| TDRD1    | 1 | 0 | - | -   | - | - | - | -   | - |
| TDRD9    | 1 | 2 | 1 | -   | - | - | - | -   | - |
| TECPR1   | 1 | 0 | - | -   | - | - | - | -   | - |
| TECPR2   | 1 | 0 | - | -   | - | - | - | -   | - |
| TECTA    | 1 | 2 | - | -   | - | - | - | -   | - |
| TEFM     | 1 | 0 | - | -   | - | - | - | -   | - |
| TEKT1    | 1 | 2 | - | -   | - | - | - | -   | - |
| TEKT3    | 1 | 2 | 2 | -   | - | - | - | -   | - |
| TEP1     | 1 | 5 | - | -   | - | - | - | -   | - |
| TERT     | 1 | 0 | - | -   | - | - | - | Yes | - |
| TES      | 1 | 0 | - | -   | - | - | - | -   | - |
| TESK2    | 1 | 0 | - | -   | - | - | - | -   | - |
| TEX30    | 1 | 0 | - | -   | - | - | - | -   | - |
| TEX33    | 1 | 1 | - | -   | - | - | - | -   | - |
| TEX38    | 1 | 1 | - | -   | - | - | - | -   | - |
| TEX40    | 1 | 0 | - | -   | - | - | - | -   | - |
| TFB1M    | 1 | 1 | - | -   | - | - | - | -   | - |
| TFB2M    | 1 | 0 | - | -   | - | - | - | -   | - |
| TGM5     | 1 | 1 | - | -   | - | - | - | -   | - |
| TGM7     | 1 | 3 | - | -   | - | - | - | -   | - |
| TGS1     | 1 | 3 | - | -   | - | - | - | -   | - |
| THADA    | 1 | 3 | - | -   | - | - | - | -   | - |
| THAP2    | 1 | 0 | 1 | -   | - | - | - | -   | - |
| THAP8    | 1 | 0 | - | -   | - | - | - | -   | - |
| THAP9    | 1 | 1 | - | -   | - | - | - | -   | - |
| THBS2    | 1 | 1 | - | -   | - | - | - | -   | - |
| THEG5    | 1 | 0 | - | -   | - | - | - | -   | - |
| THEM5    | 1 | 1 | - | -   | - | - | - | -   | - |
| THEM6    | 1 | 1 | - | -   | - | - | - | -   | - |
| THNSL2   | 1 | 0 | - | -   | - | - | - | -   | - |
| THSD4    | 1 | 1 | - | -   | - | - | - | -   | - |
| THSD7B   | 1 | 0 | 1 | -   | - | - | - | -   | - |
| THYN1    | 1 | 1 | - | -   | - | - | - | -   | - |
| TICRR    | 1 | 0 | - | -   | - | - | - | -   | - |
| TIGD3    | 1 | 0 | - | -   | - | - | - | -   | - |
| TIGD6    | 1 | 1 | - | -   | - | - | - | -   | - |
| TIMD4    | 1 | 0 | - | -   | - | - | - | -   | - |
| TIMM17B  | 1 | 0 | - | -   | - | - | - | -   | - |
| TIMP4    | 1 | 0 | - | -   | - | - | - | -   | - |
| TJP3     | 1 | 1 | 1 | -   | - | - | - | -   | - |
| TKTL2    | 1 | 1 | - | -   | - | - | - | -   | - |
| TLCD2    | 1 | 0 | - | -   | - | - | - | -   | - |
| TLK2     | 1 | 0 | - | -   | - | - | - | -   | - |
| TLN2     | 1 | 1 | - | -   | - | - | - | -   | - |
| TLR4     | 1 | 2 | - | -   | - | - | - | -   | - |
| TLR5     | 1 | 0 | - | -   | - | - | - | -   | - |
| TMA16    | 1 | 0 | - | -   | - | - | - | -   | - |
| TMC5     | 1 | 0 | - | -   | - | - | - | -   | - |

|                |   |   |   |   |   |   |   |   |   |
|----------------|---|---|---|---|---|---|---|---|---|
| TMCO2          | 1 | 0 | - | - | - | - | - | - | - |
| TMCO6          | 1 | 1 | - | - | - | - | - | - | - |
| TMED10         | 1 | 1 | - | - | - | - | - | - | - |
| TMED3          | 1 | 1 | - | - | - | - | - | - | - |
| TMED4          | 1 | 0 | - | - | - | - | - | - | - |
| TMED7-TICAM2   | 1 | 2 | - | - | - | - | - | - | - |
| TMEM100        | 1 | 0 | - | - | - | - | - | - | - |
| TMEM102        | 1 | 1 | - | - | - | - | - | - | - |
| TMEM106C       | 1 | 0 | - | - | - | - | - | - | - |
| TMEM110-MUSTN1 | 1 | 1 | - | - | - | - | - | - | - |
| TMEM116        | 1 | 0 | - | - | - | - | - | - | - |
| TMEM120A       | 1 | 0 | - | - | - | - | - | - | - |
| TMEM128        | 1 | 1 | - | - | - | - | - | - | - |
| TMEM129        | 1 | 0 | - | - | - | - | - | - | - |
| TMEM132C       | 1 | 1 | - | - | - | - | - | - | - |
| TMEM134        | 1 | 0 | - | - | - | - | - | - | - |
| TMEM136        | 1 | 1 | - | - | - | - | - | - | - |
| TMEM151A       | 1 | 0 | - | - | - | - | - | - | - |
| TMEM160        | 1 | 0 | - | - | - | - | - | - | - |
| TMEM170A       | 1 | 1 | - | - | - | - | - | - | - |
| TMEM178B       | 1 | 0 | - | - | - | - | - | - | - |
| TMEM186        | 1 | 0 | - | - | - | - | - | - | - |
| TMEM2          | 1 | 0 | 1 | - | - | - | - | - | - |
| TMEM200A       | 1 | 0 | - | - | - | - | - | - | - |
| TMEM200B       | 1 | 0 | - | - | - | - | - | - | - |
| TMEM200C       | 1 | 0 | - | - | - | - | - | - | - |
| TMEM205        | 1 | 0 | - | - | - | - | - | - | - |
| TMEM211        | 1 | 0 | - | - | - | - | - | - | - |
| TMEM213        | 1 | 0 | 1 | - | - | - | - | - | - |
| TMEM214        | 1 | 0 | - | - | - | - | - | - | - |
| TMEM217        | 1 | 0 | - | - | - | - | - | - | - |
| TMEM218        | 1 | 0 | - | - | - | - | - | - | - |
| TMEM219        | 1 | 0 | - | - | - | - | - | - | - |
| TMEM229A       | 1 | 0 | - | - | - | - | - | - | - |
| TMEM231        | 1 | 1 | - | - | - | - | - | - | - |
| TMEM235        | 1 | 0 | - | - | - | - | - | - | - |
| TMEM242        | 1 | 0 | - | - | - | - | - | - | - |
| TMEM245        | 1 | 1 | - | - | - | - | - | - | - |
| TMEM249        | 1 | 0 | - | - | - | - | - | - | - |
| TMEM253        | 1 | 0 | - | - | - | - | - | - | - |
| TMEM45B        | 1 | 1 | - | - | - | - | - | - | - |
| TMEM5          | 1 | 0 | 1 | - | - | - | - | - | - |
| TMEM52B        | 1 | 0 | - | - | - | - | - | - | - |
| TMEM62         | 1 | 0 | - | - | - | - | - | - | - |
| TMEM63C        | 1 | 0 | 1 | - | - | - | - | - | - |
| TMEM67         | 1 | 1 | - | - | - | - | - | - | - |
| TMEM81         | 1 | 0 | - | - | - | - | - | - | - |
| TMEM88B        | 1 | 0 | - | - | - | - | - | - | - |
| TMEM8A         | 1 | 3 | - | - | - | - | - | - | - |
| TMEM91         | 1 | 0 | - | - | - | - | - | - | - |
| TMEM97         | 1 | 0 | - | - | - | - | - | - | - |
| TMPO           | 1 | 0 | - | - | - | - | - | - | - |
| TMPRSS11A      | 1 | 0 | - | - | - | - | - | - | - |
| TMPRSS11B      | 1 | 0 | - | - | - | - | - | - | - |
| TMPRSS11F      | 1 | 0 | - | - | - | - | - | - | - |
| TMPRSS12       | 1 | 0 | - | - | - | - | - | - | - |
| TMPRSS7        | 1 | 0 | - | - | - | - | - | - | - |
| TMPRSS9        | 1 | 1 | - | - | - | - | - | - | - |
| TMTC1          | 1 | 0 | - | - | - | - | - | - | - |
| TMTC2          | 1 | 0 | - | - | - | - | - | - | - |
| TMTC3          | 1 | 0 | 1 | - | - | - | - | - | - |
| TNF-ALP6       | 1 | 1 | 1 | - | - | - | - | - | - |
| TNFRSF18       | 1 | 2 | - | - | - | - | - | - | - |
| TNFRSF6B       | 1 | 0 | - | - | - | - | - | - | - |
| TNFRSF9        | 1 | 0 | - | - | - | - | - | - | - |
| TNIK           | 1 | 0 | - | - | - | - | - | - | - |
| TNIP3          | 1 | 0 | - | - | - | - | - | - | - |
| TNK2           | 1 | 0 | - | - | - | - | - | - | - |
| TNNT1          | 1 | 0 | - | - | - | - | - | - | - |
| TNPO3          | 1 | 0 | - | - | - | - | - | - | - |
| TNRC6A         | 1 | 0 | - | - | - | - | - | - | - |
| TOLLIP         | 1 | 0 | - | - | - | - | - | - | - |
| TOP1MT         | 1 | 3 | - | - | - | - | - | - | - |
| TOP2B          | 1 | 0 | - | - | - | - | - | - | - |
| TOP3B          | 1 | 1 | - | - | - | - | - | - | - |
| TP53INP1       | 1 | 0 | - | - | - | - | - | - | - |
| TPBG           | 1 | 1 | - | - | - | - | - | - | - |
| TPBGL          | 1 | 0 | - | - | - | - | - | - | - |
| TPGS2          | 1 | 0 | - | - | - | - | - | - | - |
| TPO            | 1 | 2 | - | - | - | - | - | - | - |
| TPP1           | 1 | 2 | - | - | - | - | - | - | - |
| TRABD24        | 1 | 1 | - | - | - | - | - | - | - |
| TRAF3IP2       | 1 | 0 | - | - | - | - | - | - | - |
| TRAF5          | 1 | 0 | - | - | - | - | - | - | - |
| TRAK1          | 1 | 0 | - | - | - | - | - | - | - |
| TRANK1         | 1 | 0 | - | - | - | - | - | - | - |
| TRAP1          | 1 | 2 | - | - | - | - | - | - | - |
| TRAPPC11       | 1 | 0 | - | - | - | - | - | - | - |
| TRAPPC3L       | 1 | 0 | - | - | - | - | - | - | - |
| TRAPPC9        | 1 | 1 | - | - | - | - | - | - | - |
| TRDN           | 1 | 0 | - | - | - | - | - | - | - |
| TRHR           | 1 | 1 | - | - | - | - | - | - | - |
| TRIM16L        | 1 | 1 | - | - | - | - | - | - | - |
| TRIM2          | 1 | 0 | - | - | - | - | - | - | - |
| TRIM25         | 1 | 0 | - | - | - | - | - | - | - |
| TRIM45         | 1 | 2 | - | - | - | - | - | - | - |
| TRIM5          | 1 | 0 | - | - | - | - | - | - | - |
| TRIM52         | 1 | 0 | - | - | - | - | - | - | - |
| TRIM58         | 1 | 0 | - | - | - | - | - | - | - |
| TRIM59         | 1 | 1 | - | - | - | - | - | - | - |
| TRIM65         | 1 | 3 | - | - | - | - | - | - | - |
| TRIM66         | 1 | 0 | - | - | - | - | - | - | - |
| TRIM67         | 1 | 0 | - | - | - | - | - | - | - |
| TRIM72         | 1 | 0 | - | - | - | - | - | - | - |
| TRIM77         | 1 | 0 | - | - | - | - | - | - | - |
| TRIP4          | 1 | 0 | - | - | - | - | - | - | - |



|          |   |   |   |   |     |   |   |   |   |
|----------|---|---|---|---|-----|---|---|---|---|
| TRIT1    | 1 | 2 | - | - | -   | - | - | - | - |
| TRMT10C  | 1 | 0 | 1 | - | -   | - | - | - | - |
| TRMT11   | 1 | 0 | - | - | -   | - | - | - | - |
| TRMT112  | 1 | 1 | - | - | -   | - | - | - | - |
| TRMT5    | 1 | 1 | - | - | -   | - | - | - | - |
| TRMT61B  | 1 | 0 | - | - | -   | - | - | - | - |
| TRNT1    | 1 | 3 | - | - | -   | - | - | - | - |
| TRPA1    | 1 | 1 | - | - | -   | - | - | - | - |
| TRPC7    | 1 | 0 | - | - | -   | - | - | - | - |
| TRPM5    | 1 | 3 | 1 | - | -   | - | - | - | - |
| TRPM6    | 1 | 2 | - | - | -   | - | - | - | - |
| TRPM8    | 1 | 2 | - | - | -   | - | - | - | - |
| TRUB2    | 1 | 1 | - | - | -   | - | - | - | - |
| TSACC    | 1 | 0 | - | - | -   | - | - | - | - |
| TSGA10IP | 1 | 0 | - | - | -   | - | - | - | - |
| TSHB     | 1 | 0 | - | - | -   | - | - | - | - |
| TSNAXIP1 | 1 | 3 | - | - | -   | - | - | - | - |
| TSPAN10  | 1 | 0 | 1 | - | -   | - | - | - | - |
| TSPAN18  | 1 | 0 | - | - | -   | - | - | - | - |
| TSPAN32  | 1 | 0 | - | - | -   | - | - | - | - |
| TSPEAR   | 1 | 5 | 1 | - | -   | - | - | - | - |
| TSRI     | 1 | 3 | - | - | -   | - | - | - | - |
| TSSK3    | 1 | 0 | - | - | -   | - | - | - | - |
| TSTA3    | 1 | 0 | - | - | -   | - | - | - | - |
| TSTD2    | 1 | 1 | - | - | -   | - | - | - | - |
| TSTD3    | 1 | 0 | - | - | -   | - | - | - | - |
| TTC12    | 1 | 1 | - | - | -   | - | - | - | - |
| TTC16    | 1 | 0 | - | - | -   | - | - | - | - |
| CFAP70   | 1 | 2 | - | - | -   | - | - | - | - |
| TTC21A   | 1 | 1 | - | - | -   | - | - | - | - |
| TTC22    | 1 | 0 | - | - | -   | - | - | - | - |
| TTC26    | 1 | 0 | - | - | -   | - | - | - | - |
| TTC30B   | 1 | 0 | - | - | -   | - | - | - | - |
| TTC37    | 1 | 1 | - | - | -   | - | - | - | - |
| TTC39A   | 1 | 0 | - | - | -   | - | - | - | - |
| TTC39C   | 1 | 0 | - | - | -   | - | - | - | - |
| TKK      | 1 | 2 | - | - | -   | - | - | - | - |
| TLL110   | 1 | 2 | - | - | -   | - | - | - | - |
| TLL4     | 1 | 0 | - | - | -   | - | - | - | - |
| TLL9     | 1 | 1 | - | - | -   | - | - | - | - |
| TUBE1    | 1 | 0 | - | - | -   | - | - | - | - |
| TUBGCP2  | 1 | 4 | - | - | -   | - | - | - | - |
| TUT1     | 1 | 2 | - | - | -   | - | - | - | - |
| TXK      | 1 | 0 | - | - | -   | - | - | - | - |
| TXNDC11  | 1 | 0 | - | - | -   | - | - | - | - |
| TXNDC5   | 1 | 1 | - | - | -   | - | - | - | - |
| TXNRD2   | 1 | 2 | - | - | -   | - | - | - | - |
| TXNRD3   | 1 | 0 | - | - | -   | - | - | - | - |
| TYMP     | 1 | 0 | - | - | -   | - | - | - | - |
| TYW1B    | 1 | 0 | - | - | -   | - | - | - | - |
| TYW3     | 1 | 0 | - | - | -   | - | - | - | - |
| UACA     | 1 | 3 | - | - | -   | - | - | - | - |
| UAP1L1   | 1 | 0 | - | - | -   | - | - | - | - |
| UBA6     | 1 | 0 | - | - | -   | - | - | - | - |
| UBAC2    | 1 | 0 | - | - | -   | - | - | - | - |
| UBAP1L   | 1 | 0 | - | - | -   | - | - | - | - |
| UBAP2    | 1 | 1 | - | - | -   | - | - | - | - |
| UBASH3A  | 1 | 2 | - | - | -   | - | - | - | - |
| UBE2C    | 1 | 0 | - | - | -   | - | - | - | - |
| UBE2D3   | 1 | 0 | - | - | Yes | - | - | - | - |
| UBE4B    | 1 | 1 | - | - | Yes | - | - | - | - |
| UBL4B    | 1 | 0 | - | - | -   | - | - | - | - |
| UBL7     | 1 | 0 | - | - | -   | - | - | - | - |
| UBQLNL   | 1 | 0 | - | - | -   | - | - | - | - |
| UBR3     | 1 | 0 | 1 | - | -   | - | - | - | - |
| UBR4     | 1 | 3 | 2 | - | -   | - | - | - | - |
| UBR7     | 1 | 0 | - | - | -   | - | - | - | - |
| UBTF     | 1 | 2 | - | - | -   | - | - | - | - |
| UBXN10   | 1 | 0 | - | - | -   | - | - | - | - |
| UBXN11   | 1 | 0 | - | - | -   | - | - | - | - |
| UCKL1    | 1 | 0 | - | - | -   | - | - | - | - |
| UGT1A4   | 1 | 1 | - | - | -   | - | - | - | - |
| UGT2A1   | 1 | 0 | - | - | -   | - | - | - | - |
| UGT2A3   | 1 | 0 | - | - | -   | - | - | - | - |
| UGT2B4   | 1 | 1 | - | - | -   | - | - | - | - |
| ULBP3    | 1 | 0 | - | - | -   | - | - | - | - |
| UMODL1   | 1 | 1 | - | - | -   | - | - | - | - |
| UNC13B   | 1 | 0 | - | - | -   | - | - | - | - |
| UNC13C   | 1 | 2 | - | - | -   | - | - | - | - |
| UNC5A    | 1 | 0 | 1 | - | -   | - | - | - | - |
| UNC5CL   | 1 | 2 | - | - | -   | - | - | - | - |
| UNC80    | 1 | 2 | - | - | -   | - | - | - | - |
| UNKL     | 1 | 0 | - | - | -   | - | - | - | - |
| UPK2     | 1 | 1 | - | - | -   | - | - | - | - |
| UPK3A    | 1 | 2 | 1 | - | -   | - | - | - | - |
| UQCC1    | 1 | 1 | - | - | -   | - | - | - | - |
| UR11     | 1 | 1 | - | - | -   | - | - | - | - |
| UROCI    | 1 | 1 | - | - | -   | - | - | - | - |
| USH1C    | 1 | 0 | - | - | -   | - | - | - | - |
| USH1G    | 1 | 0 | - | - | -   | - | - | - | - |
| USMG5    | 1 | 0 | - | - | -   | - | - | - | - |
| USP28    | 1 | 1 | - | - | Yes | - | - | - | - |
| USP35    | 1 | 0 | 1 | - | -   | - | - | - | - |
| USP38    | 1 | 0 | - | - | -   | - | - | - | - |
| USP40    | 1 | 4 | - | - | -   | - | - | - | - |
| USP42    | 1 | 0 | - | - | -   | - | - | - | - |
| USP47    | 1 | 0 | - | - | -   | - | - | - | - |
| USP6     | 1 | 0 | - | - | -   | - | - | - | - |
| UTRN     | 1 | 1 | - | - | -   | - | - | - | - |
| UVSSA    | 1 | 0 | - | - | -   | - | - | - | - |
| VASH1    | 1 | 0 | - | - | -   | - | - | - | - |
| VAT1L    | 1 | 1 | - | - | -   | - | - | - | - |
| VAV1     | 1 | 0 | - | - | -   | - | - | - | - |
| VAV3     | 1 | 1 | - | - | -   | - | - | - | - |
| VCAM1    | 1 | 1 | - | - | -   | - | - | - | - |
| VEGFB    | 1 | 0 | - | - | -   | - | - | - | - |

|         |   |   |   |     |   |   |   |     |   |
|---------|---|---|---|-----|---|---|---|-----|---|
| VEPH1   | 1 | 3 | - | -   | - | - | - | -   | - |
| VHLL    | 1 | 1 | 1 | -   | - | - | - | -   | - |
| VIPR1   | 1 | 1 | - | -   | - | - | - | -   | - |
| VMAC    | 1 | 0 | - | -   | - | - | - | -   | - |
| YMO1    | 1 | 0 | - | -   | - | - | - | -   | - |
| VN1R2   | 1 | 0 | - | -   | - | - | - | -   | - |
| VN1R4   | 1 | 0 | - | -   | - | - | - | -   | - |
| VPS11   | 1 | 0 | - | -   | - | - | - | -   | - |
| VPS13B  | 1 | 2 | - | -   | - | - | - | -   | - |
| VPS16   | 1 | 0 | - | -   | - | - | - | -   | - |
| VPS28   | 1 | 0 | - | -   | - | - | - | -   | - |
| VPS37B  | 1 | 0 | - | -   | - | - | - | -   | - |
| VPS8    | 1 | 0 | 1 | -   | - | - | - | -   | - |
| VRK3    | 1 | 1 | 1 | -   | - | - | - | -   | - |
| VSIG10L | 1 | 0 | - | -   | - | - | - | -   | - |
| VSIG4   | 1 | 1 | - | -   | - | - | - | -   | - |
| VSTM2B  | 1 | 0 | - | -   | - | - | - | -   | - |
| VW42    | 1 | 0 | - | -   | - | - | - | -   | - |
| VW43A   | 1 | 1 | - | -   | - | - | - | -   | - |
| VW43B   | 1 | 0 | 1 | -   | - | - | - | -   | - |
| VW45B2  | 1 | 1 | - | -   | - | - | - | -   | - |
| VW49    | 1 | 1 | - | -   | - | - | - | -   | - |
| VWCE    | 1 | 0 | 1 | -   | - | - | - | -   | - |
| WBP2NL  | 1 | 1 | - | -   | - | - | - | -   | - |
| WDR11   | 1 | 3 | - | -   | - | - | - | -   | - |
| CFAP52  | 1 | 1 | - | Yes | - | - | - | -   | - |
| WDR17   | 1 | 2 | 1 | -   | - | - | - | -   | - |
| WDR19   | 1 | 0 | - | -   | - | - | - | -   | - |
| WDR27   | 1 | 1 | - | -   | - | - | - | -   | - |
| WDR3    | 1 | 0 | 1 | -   | - | - | - | -   | - |
| WDR31   | 1 | 2 | - | -   | - | - | - | -   | - |
| WDR35   | 1 | 0 | - | -   | - | - | - | -   | - |
| WDR36   | 1 | 1 | - | -   | - | - | - | -   | - |
| WDR38   | 1 | 1 | - | -   | - | - | - | -   | - |
| WDR49   | 1 | 1 | - | -   | - | - | - | -   | - |
| CFAP44  | 1 | 3 | - | -   | - | - | - | -   | - |
| WDR5B   | 1 | 1 | - | -   | - | - | - | -   | - |
| WDR70   | 1 | 0 | - | -   | - | - | - | -   | - |
| WDR72   | 1 | 1 | - | -   | - | - | - | -   | - |
| WDR76   | 1 | 0 | - | -   | - | - | - | -   | - |
| WDR77   | 1 | 0 | - | -   | - | - | - | -   | - |
| WDR78   | 1 | 0 | 1 | -   | - | - | - | -   | - |
| WDR81   | 1 | 0 | 1 | -   | - | - | - | -   | - |
| WDR83   | 1 | 1 | - | -   | - | - | - | -   | - |
| WDR89   | 1 | 1 | - | -   | - | - | - | -   | - |
| WDSUB1  | 1 | 0 | - | -   | - | - | - | -   | - |
| WEE2    | 1 | 0 | - | -   | - | - | - | -   | - |
| WFDC1   | 1 | 0 | - | -   | - | - | - | -   | - |
| WFDC10B | 1 | 0 | - | -   | - | - | - | -   | - |
| WFDC5   | 1 | 0 | - | -   | - | - | - | -   | - |
| WFS1    | 1 | 1 | 1 | -   | - | - | - | -   | - |
| WHAMM   | 1 | 1 | - | -   | - | - | - | -   | - |
| WISP2   | 1 | 0 | - | -   | - | - | - | -   | - |
| WISP3   | 1 | 0 | - | -   | - | - | - | -   | - |
| WNK2    | 1 | 1 | - | -   | - | - | - | -   | - |
| WRN     | 1 | 2 | - | Yes | - | - | - | Yes | - |
| WWP2    | 1 | 1 | - | Yes | - | - | - | -   | - |
| XDH     | 1 | 2 | - | -   | - | - | - | -   | - |
| XIRP1   | 1 | 0 | - | -   | - | - | - | -   | - |
| XKR5    | 1 | 2 | 1 | -   | - | - | - | -   | - |
| XXYLT1  | 1 | 0 | - | -   | - | - | - | -   | - |
| XYLB    | 1 | 0 | - | -   | - | - | - | -   | - |
| XYLT2   | 1 | 0 | - | -   | - | - | - | -   | - |
| YBX3    | 1 | 0 | - | -   | - | - | - | -   | - |
| YDJC    | 1 | 1 | - | -   | - | - | - | -   | - |
| YJEFN3  | 1 | 0 | - | -   | - | - | - | -   | - |
| YLPM1   | 1 | 2 | - | -   | - | - | - | -   | - |
| ZACN    | 1 | 3 | - | -   | - | - | - | -   | - |
| ZAP70   | 1 | 1 | - | -   | - | - | - | -   | - |
| ZBED3   | 1 | 0 | - | -   | - | - | - | -   | - |
| ZBTB21  | 1 | 0 | 1 | -   | - | - | - | -   | - |
| ZBTB3   | 1 | 0 | - | -   | - | - | - | -   | - |
| ZBTB32  | 1 | 0 | - | -   | - | - | - | -   | - |
| ZC2HC1B | 1 | 1 | - | -   | - | - | - | -   | - |
| ZC3H12C | 1 | 0 | - | -   | - | - | - | -   | - |
| ZC3H6   | 1 | 0 | - | -   | - | - | - | -   | - |
| ZC3HAV1 | 1 | 0 | - | -   | - | - | - | -   | - |
| ZCCHC2  | 1 | 0 | - | -   | - | - | - | -   | - |
| ZCCHC3  | 1 | 0 | - | -   | - | - | - | -   | - |
| ZCWPW2  | 1 | 0 | - | -   | - | - | - | -   | - |
| ZDHH11  | 1 | 0 | - | -   | - | - | - | -   | - |
| ZDHH13  | 1 | 0 | - | -   | - | - | - | -   | - |
| ZDHH15  | 1 | 0 | - | -   | - | - | - | -   | - |
| ZDHH14  | 1 | 1 | - | -   | - | - | - | -   | - |
| ZDHH16  | 1 | 0 | - | -   | - | - | - | -   | - |
| ZDHH18  | 1 | 0 | - | -   | - | - | - | -   | - |
| ZFAND6  | 1 | 0 | - | -   | - | - | - | -   | - |
| ZFP14   | 1 | 0 | - | -   | - | - | - | -   | - |
| ZFP28   | 1 | 1 | - | -   | - | - | - | -   | - |
| ZFP37   | 1 | 1 | - | -   | - | - | - | -   | - |
| ZFP64   | 1 | 0 | - | -   | - | - | - | -   | - |
| ZFP92   | 1 | 0 | - | -   | - | - | - | -   | - |
| ZFYVE19 | 1 | 1 | - | -   | - | - | - | -   | - |
| ZFYVE27 | 1 | 0 | - | -   | - | - | - | -   | - |
| ZIK1    | 1 | 0 | - | -   | - | - | - | -   | - |
| ZKSCAN3 | 1 | 0 | - | -   | - | - | - | -   | - |
| ZKSCAN7 | 1 | 1 | - | -   | - | - | - | -   | - |
| ZMYND15 | 1 | 1 | - | -   | - | - | - | -   | - |
| ZNF106  | 1 | 0 | - | -   | - | - | - | -   | - |
| ZNF114  | 1 | 1 | - | -   | - | - | - | -   | - |
| ZNF14   | 1 | 1 | - | -   | - | - | - | -   | - |
| ZNF154  | 1 | 0 | - | -   | - | - | - | -   | - |
| ZNF17   | 1 | 2 | - | -   | - | - | - | -   | - |
| ZNF177  | 1 | 0 | - | -   | - | - | - | -   | - |
| ZNF181  | 1 | 0 | - | -   | - | - | - | -   | - |
| ZNF195  | 1 | 0 | - | -   | - | - | - | -   | - |

|          |   |   |   |   |   |   |   |   |
|----------|---|---|---|---|---|---|---|---|
| ZNF200   | 1 | 0 | - | - | - | - | - | - |
| ZNF214   | 1 | 1 | - | - | - | - | - | - |
| ZNF215   | 1 | 2 | - | - | - | - | - | - |
| ZNF221   | 1 | 1 | - | - | - | - | - | - |
| ZNF225   | 1 | 1 | - | - | - | - | - | - |
| ZNF234   | 1 | 1 | 1 | - | - | - | - | - |
| ZNF236   | 1 | 0 | - | - | - | - | - | - |
| ZNF251   | 1 | 1 | - | - | - | - | - | - |
| ZPR1     | 1 | 0 | - | - | - | - | - | - |
| ZNF263   | 1 | 0 | - | - | - | - | - | - |
| ZNF280C  | 1 | 0 | - | - | - | - | - | - |
| ZNF283   | 1 | 0 | - | - | - | - | - | - |
| ZNF3     | 1 | 1 | - | - | - | - | - | - |
| ZNF300   | 1 | 0 | - | - | - | - | - | - |
| ZNF333   | 1 | 1 | - | - | - | - | - | - |
| ZNF334   | 1 | 0 | - | - | - | - | - | - |
| ZNF335   | 1 | 0 | - | - | - | - | - | - |
| ZNF337   | 1 | 1 | 1 | - | - | - | - | - |
| ZNF338   | 1 | 1 | - | - | - | - | - | - |
| ZNF34    | 1 | 0 | - | - | - | - | - | - |
| ZNF341   | 1 | 0 | - | - | - | - | - | - |
| ZNF347   | 1 | 1 | - | - | - | - | - | - |
| ZNF354C  | 1 | 0 | - | - | - | - | - | - |
| ZNF365   | 1 | 0 | - | - | - | - | - | - |
| ZNF366   | 1 | 0 | - | - | - | - | - | - |
| ZNF385B  | 1 | 0 | - | - | - | - | - | - |
| ZNF396   | 1 | 1 | - | - | - | - | - | - |
| ZNF417   | 1 | 2 | - | - | - | - | - | - |
| ZNF425   | 1 | 0 | - | - | - | - | - | - |
| ZNF44    | 1 | 1 | - | - | - | - | - | - |
| ZNF443   | 1 | 0 | - | - | - | - | - | - |
| ZNF461   | 1 | 1 | - | - | - | - | - | - |
| ZNF467   | 1 | 1 | - | - | - | - | - | - |
| ZNF469   | 1 | 0 | - | - | - | - | - | - |
| ZNF470   | 1 | 2 | - | - | - | - | - | - |
| ZNF484   | 1 | 0 | - | - | - | - | - | - |
| ZNF501   | 1 | 1 | - | - | - | - | - | - |
| ZNF502   | 1 | 0 | - | - | - | - | - | - |
| ZNF511   | 1 | 1 | - | - | - | - | - | - |
| ZNF512B  | 1 | 0 | - | - | - | - | - | - |
| ZNF526   | 1 | 2 | - | - | - | - | - | - |
| ZNF534   | 1 | 2 | - | - | - | - | - | - |
| ZNF536   | 1 | 0 | - | - | - | - | - | - |
| ZNF544   | 1 | 2 | - | - | - | - | - | - |
| ZNF546   | 1 | 2 | - | - | - | - | - | - |
| ZNF550   | 1 | 1 | - | - | - | - | - | - |
| ZNF557   | 1 | 0 | - | - | - | - | - | - |
| ZNF559   | 1 | 1 | - | - | - | - | - | - |
| ZNF560   | 1 | 3 | - | - | - | - | - | - |
| ZNF565   | 1 | 1 | - | - | - | - | - | - |
| ZNF566   | 1 | 0 | - | - | - | - | - | - |
| ZNF567   | 1 | 0 | - | - | - | - | - | - |
| ZNF568   | 1 | 1 | - | - | - | - | - | - |
| ZNF576   | 1 | 1 | - | - | - | - | - | - |
| ZNF582   | 1 | 2 | - | - | - | - | - | - |
| ZNF593   | 1 | 0 | - | - | - | - | - | - |
| ZNF607   | 1 | 1 | - | - | - | - | - | - |
| ZNF615   | 1 | 1 | - | - | - | - | - | - |
| ZNF618   | 1 | 0 | - | - | - | - | - | - |
| ZNF626   | 1 | 0 | - | - | - | - | - | - |
| ZNF648   | 1 | 1 | - | - | - | - | - | - |
| ZNF665   | 1 | 0 | - | - | - | - | - | - |
| ZNF674   | 1 | 1 | - | - | - | - | - | - |
| ZNF677   | 1 | 1 | - | - | - | - | - | - |
| ZNF678   | 1 | 0 | - | - | - | - | - | - |
| ZNF688   | 1 | 0 | - | - | - | - | - | - |
| ZNF691   | 1 | 0 | - | - | - | - | - | - |
| ZNF7     | 1 | 1 | - | - | - | - | - | - |
| ZNF700   | 1 | 0 | - | - | - | - | - | - |
| ZNF708   | 1 | 0 | - | - | - | - | - | - |
| ZNF713   | 1 | 0 | - | - | - | - | - | - |
| ZNF727   | 1 | 1 | - | - | - | - | - | - |
| ZNF729   | 1 | 0 | - | - | - | - | - | - |
| ZNF76    | 1 | 0 | - | - | - | - | - | - |
| ZNF766   | 1 | 1 | - | - | - | - | - | - |
| ZNF780A  | 1 | 1 | - | - | - | - | - | - |
| ZNF789   | 1 | 0 | - | - | - | - | - | - |
| ZNF79    | 1 | 0 | - | - | - | - | - | - |
| ZNF790   | 1 | 1 | - | - | - | - | - | - |
| ZNF793   | 1 | 1 | - | - | - | - | - | - |
| ZNF804A  | 1 | 1 | - | - | - | - | - | - |
| ZNF814   | 1 | 1 | - | - | - | - | - | - |
| ZNF831   | 1 | 0 | - | - | - | - | - | - |
| ZNF835   | 1 | 2 | - | - | - | - | - | - |
| ZNF836   | 1 | 0 | - | - | - | - | - | - |
| ZNF837   | 1 | 1 | - | - | - | - | - | - |
| ZNF839   | 1 | 0 | - | - | - | - | - | - |
| ZNF84    | 1 | 0 | - | - | - | - | - | - |
| ZNF841   | 1 | 0 | 1 | - | - | - | - | - |
| ZNF843   | 1 | 0 | - | - | - | - | - | - |
| ZNF844   | 1 | 0 | - | - | - | - | - | - |
| ZNF862   | 1 | 0 | - | - | - | - | - | - |
| ZNF883   | 1 | 0 | - | - | - | - | - | - |
| ZNFX1    | 1 | 2 | 1 | - | - | - | - | - |
| ZNHIT1   | 1 | 0 | - | - | - | - | - | - |
| ZP4      | 1 | 2 | - | - | - | - | - | - |
| ZPLD1    | 1 | 1 | - | - | - | - | - | - |
| ZRANB3   | 1 | 3 | - | - | - | - | - | - |
| ZRSR2    | 1 | 0 | - | - | - | - | - | - |
| ZSCAN23  | 1 | 0 | - | - | - | - | - | - |
| ZSCAN25  | 1 | 0 | - | - | - | - | - | - |
| ZSCAN31  | 1 | 0 | - | - | - | - | - | - |
| ZSCAN32  | 1 | 0 | - | - | - | - | - | - |
| ZSCAN35B | 1 | 1 | - | - | - | - | - | - |
| ZSWIM4   | 1 | 1 | - | - | - | - | - | - |
| ZXDC     | 1 | 0 | - | - | - | - | - | - |

BCCS - Bipolar Case Control Study. FPC - familial pancreatic cancer. PTVs - premature truncating variants.

**Supplementary Table S2.** FPC patients harboring a private PTVs *ASXL1*, *DNMT3A*, and *TET2*

| Gene          | Transcript   | Sample ID | Type         | Consequence | Genomic change <sup>a</sup>               | Amino acid change <sup>b</sup> | Percentage of reads supporting the variant |
|---------------|--------------|-----------|--------------|-------------|-------------------------------------------|--------------------------------|--------------------------------------------|
| <i>ASXL1</i>  | NM_015338    | FPC0083   | Insertion    | Frameshift  | g.chr20:31022414_T>TA                     | p.H633fs                       | 26.7                                       |
|               |              | FPC0172   | Deletion     | Frameshift  | g.chr20:31023040_ATG>A                    | p.842_843del                   | 16.7                                       |
|               |              | FPC0206   | Deletion     | Frameshift  | g.chr20:31022674_AC>A                     | p.D720fs                       | 16.7                                       |
|               |              | FPC0500   | Substitution | Nonsense    | g.chr20:31022245_C>G                      | p.S577X                        | 22.2                                       |
|               |              | FPC0511   | Deletion     | Frameshift  | g.chr20:31022402_TCACCCTGCCATAGAGAGCGGC>T | p.630_637del                   | 13.9                                       |
| <i>DNMT3A</i> | NM_175629    | FPC0003   | Insertion    | Frameshift  | g.chr2:25463554_A>AGG                     | p.C710fs                       | 11.6                                       |
|               |              | FPC0113   | Deletion     | Frameshift  | g.chr2:25468162_TC>T                      | p.E505fs                       | 28.6                                       |
|               |              | FPC0291   | Deletion     | Frameshift  | g.chr2:25469529_GC>G                      | p.G413fs                       | 34.3                                       |
|               |              | FPC0306   | Substitution | Nonsense    | g.chr2:25462023_C>T                       | p.W795X                        | 20.0                                       |
|               |              | FPC0306   | Substitution | Nonsense    | g.chr2:25470583_C>T                       | p.W297X                        | 21.4                                       |
|               |              | FPC0443   | Substitution | Splicing    | g.chr2:25470905_C>T                       | sp                             | 36.6                                       |
|               |              | FPC0557   | Deletion     | Frameshift  | g.chr2:25463577_TCGAATGGGCCCA>T           | p.698_702del                   | 18.0                                       |
| <i>TET2</i>   | NM_001127208 | FPC0072   | Substitution | Nonsense    | g.chr4:106196537_C>T                      | p.Q1624X                       | 33.3                                       |
|               |              | FPC0113   | Deletion     | Frameshift  | g.chr4:106158407_ATT>A                    | p.1103_1104del                 | 35.0                                       |
|               |              | FPC0267   | Insertion    | Frameshift  | g.chr4:106197096_C>CT                     | p.A1810fs                      | 12.8                                       |
|               |              | FPC0274   | Insertion    | Frameshift  | g.chr4:106157833_G>GC                     | p.A912fs                       | 28.2                                       |
|               |              | FPC0319   | Substitution | Nonsense    | g.chr4:106156729_C>T                      | p.R544X                        | 25.0                                       |
|               |              | FPC0399   | Substitution | Nonsense    | g.chr4:106197276_C>A                      | p.S1870X                       | 28.6                                       |
|               |              | FPC0637   | Deletion     | Frameshift  | g.chr4:106156656_TG>T                     | p.G520fs                       | 32.4                                       |
|               |              | FPC0639   | Substitution | Nonsense    | g.chr4:106190903_T>A                      | p.L1394X                       | 35.7                                       |
|               |              | FPC0694   | Deletion     | Frameshift  | g.chr4:106157427_TG>T                     | p.G777fs                       | 52.5                                       |

<sup>a</sup>Genomic coordinates are in hg19 human genome format and are on the + strand. All changes are heterozygous. g - genomic sequence. <sup>b</sup>p - protein sequence; fs - frameshift; sp - splicing variant. FPC - familial pancreatic cancer.

**Supplementary Table S3.** 87 genes analyzed in-depth in FPC patients and kindreds

| <b>Gene</b>                | <b>FPC susceptibility gene</b> | <b>Hereditary cancer gene</b> | <b>Hereditary pancreatitis gene</b> |
|----------------------------|--------------------------------|-------------------------------|-------------------------------------|
| <i>ATM</i>                 | X                              | X                             |                                     |
| <i>BRCA1</i>               | X                              | X                             |                                     |
| <i>BRCA2</i> <sup>a</sup>  | X                              | X                             |                                     |
| <i>CDKN2A</i>              | X                              | X                             |                                     |
| <i>MLH1</i>                | X                              | X                             |                                     |
| <i>MSH2</i>                | X                              | X                             |                                     |
| <i>MSH6</i>                | X                              | X                             |                                     |
| <i>PALB2</i> <sup>b</sup>  | X                              | X                             |                                     |
| <i>PMS2</i>                | X                              | X                             |                                     |
| <i>PRSS1</i>               | X                              | X                             | X                                   |
| <i>STK11</i>               | X                              | X                             |                                     |
| <i>TP53</i>                | X                              | X                             |                                     |
| <i>BRIP1</i> <sup>c</sup>  |                                | X                             |                                     |
| <i>ERCC4</i> <sup>d</sup>  |                                | X                             |                                     |
| <i>FANCA</i>               |                                | X                             |                                     |
| <i>FANCB</i>               |                                | X                             |                                     |
| <i>FANCC</i>               |                                | X                             |                                     |
| <i>FANCD2</i>              |                                | X                             |                                     |
| <i>FANCE</i>               |                                | X                             |                                     |
| <i>FANCF</i>               |                                | X                             |                                     |
| <i>FANCG</i>               |                                | X                             |                                     |
| <i>FANCI</i>               |                                | X                             |                                     |
| <i>FANCL</i>               |                                | X                             |                                     |
| <i>FANCM</i>               |                                | X                             |                                     |
| <i>RAD51C</i> <sup>e</sup> |                                | X                             |                                     |
| <i>SLX4</i> <sup>f</sup>   |                                | X                             |                                     |
| <i>CPA1</i>                |                                |                               | X                                   |
| <i>ALK</i>                 |                                | X                             |                                     |
| <i>APC</i>                 |                                | X                             |                                     |
| <i>AXIN2</i>               |                                | X                             |                                     |
| <i>BAP1</i>                |                                | X                             |                                     |
| <i>BLM</i>                 |                                | X                             |                                     |
| <i>BMPRI1A</i>             |                                | X                             |                                     |
| <i>BUB1B</i>               |                                | X                             |                                     |
| <i>CDC73</i>               |                                | X                             |                                     |
| <i>CDH1</i>                |                                | X                             |                                     |
| <i>CDK4</i>                |                                | X                             |                                     |
| <i>CHEK2</i>               |                                | X                             |                                     |
| <i>CREBBP</i>              |                                | X                             |                                     |
| <i>CYLD</i>                |                                | X                             |                                     |
| <i>DDB2</i>                |                                | X                             |                                     |
| <i>DICER1</i>              |                                | X                             |                                     |
| <i>EP300</i>               |                                | X                             |                                     |
| <i>ERCC2</i>               |                                | X                             |                                     |

|                |   |
|----------------|---|
| <i>ERCC3</i>   | X |
| <i>ERCC5</i>   | X |
| <i>EXT1</i>    | X |
| <i>EXT2</i>    | X |
| <i>FH</i>      | X |
| <i>FLCN</i>    | X |
| <i>GPC3</i>    | X |
| <i>KIT</i>     | X |
| <i>MEN1</i>    | X |
| <i>MET</i>     | X |
| <i>MUTYH</i>   | X |
| <i>NBN</i>     | X |
| <i>NF1</i>     | X |
| <i>NF2</i>     | X |
| <i>PDGFRA</i>  | X |
| <i>PHOX2B</i>  | X |
| <i>PMS1</i>    | X |
| <i>POLD1</i>   | X |
| <i>POLE</i>    | X |
| <i>POLH</i>    | X |
| <i>POT1</i>    | X |
| <i>PRKARIA</i> | X |
| <i>PTCH1</i>   | X |
| <i>PTEN</i>    | X |
| <i>RB1</i>     | X |
| <i>RECQL4</i>  | X |
| <i>RET</i>     | X |
| <i>SBDS</i>    | X |
| <i>SDHAF2</i>  | X |
| <i>SDHB</i>    | X |
| <i>SDHC</i>    | X |
| <i>SDHD</i>    | X |
| <i>SMAD4</i>   | X |
| <i>SUFU</i>    | X |
| <i>TERT</i>    | X |
| <i>TSC1</i>    | X |
| <i>TSC2</i>    | X |
| <i>VHL</i>     | X |
| <i>WAS</i>     | X |
| <i>WRN</i>     | X |
| <i>WT1</i>     | X |
| <i>XPA</i>     | X |
| <i>XPC</i>     | X |

---

<sup>a</sup>Also known as *FANCD1*. <sup>b</sup>Also known as *FANCN*. <sup>c</sup>Also known as *FANCI*. <sup>d</sup>Also known as *FANCG*.

<sup>e</sup>Also known as *FANCP*. <sup>f</sup>Also known as *FANCO*. FPC - familial pancreatic cancer.

Supplementary Table S4. Deleterious variants in FPC patients and kindreds

| Gene    | FPC patients  |                                        |                     |                                |                                            | FPC kindred   |                                        |                     |                                |                                            |
|---------|---------------|----------------------------------------|---------------------|--------------------------------|--------------------------------------------|---------------|----------------------------------------|---------------------|--------------------------------|--------------------------------------------|
|         | SNVs & INDELS | Number of deleterious variants<br>SVDs | SNVs, INDELS & SVDs | Number of VUS<br>SNVs & INDELS | Number of benign variants<br>SNVs & INDELS | SNVs & INDELS | Number of deleterious variants<br>SVDs | SNVs, INDELS & SVDs | Number of VUS<br>SNVs & INDELS | Number of benign variants<br>SNVs & INDELS |
| ATM     | 21            | 1                                      | 22                  | 77                             | 1701                                       | 19            | 0                                      | 19                  | 71                             | 1576                                       |
| BRCA1   | 7             | 6                                      | 13                  | 15                             | 3312                                       | 7             | 6                                      | 13                  | 14                             | 3144                                       |
| BRCA2   | 10            | 1                                      | 11                  | 15                             | 5380                                       | 10            | 0                                      | 10                  | 12                             | 4989                                       |
| CDKN2A  | 16            | 0                                      | 16                  | 17                             | 33                                         | 12            | 0                                      | 12                  | 15                             | 32                                         |
| MLH1    | 0             | 0                                      | 0                   | 14                             | 457                                        | 0             | 0                                      | 0                   | 12                             | 422                                        |
| MSH2    | 0             | 0                                      | 0                   | 19                             | 47                                         | 0             | 0                                      | 0                   | 18                             | 44                                         |
| MSH6    | 0             | 0                                      | 0                   | 16                             | 1103                                       | 0             | 0                                      | 0                   | 14                             | 1020                                       |
| PALB2   | 5             | 0                                      | 5                   | 13                             | 257                                        | 5             | 0                                      | 5                   | 13                             | 246                                        |
| PMS2    | 0             | 0                                      | 0                   | 10                             | 3034                                       | 0             | 0                                      | 0                   | 10                             | 2830                                       |
| PRSS1   | 1             | 0                                      | 1                   | 2                              | 0                                          | 1             | 0                                      | 1                   | 2                              | 0                                          |
| STK11   | 0             | 0                                      | 0                   | 3                              | 10                                         | 0             | 0                                      | 0                   | 3                              | 9                                          |
| TP53    | 2             | 0                                      | 2                   | 7                              | 978                                        | 2             | 0                                      | 2                   | 7                              | 924                                        |
| BRIP1   | 4             | 1                                      | 5                   | 15                             | 2264                                       | 4             | 1                                      | 5                   | 13                             | 2108                                       |
| ERCC4   | 6             | 0                                      | 6                   | 18                             | 592                                        | 4             | 0                                      | 4                   | 17                             | 557                                        |
| FANCA   | 0             | 7                                      | 7                   | 45                             | 2538                                       | 0             | 6                                      | 6                   | 41                             | 2350                                       |
| FANCB   | 0             | 0                                      | 0                   | 12                             | 93                                         | 0             | 0                                      | 0                   | 12                             | 86                                         |
| FANCC   | 3             | 0                                      | 3                   | 16                             | 13                                         | 3             | 0                                      | 3                   | 14                             | 11                                         |
| FANCD2  | 0             | 4                                      | 4                   | 367                            | 292                                        | 0             | 4                                      | 4                   | 332                            | 264                                        |
| FANCE   | 0             | 0                                      | 0                   | 16                             | 1012                                       | 0             | 0                                      | 0                   | 15                             | 941                                        |
| FANCF   | 2             | 0                                      | 2                   | 5                              | 97                                         | 2             | 0                                      | 2                   | 5                              | 92                                         |
| FANCG   | 4             | 0                                      | 4                   | 15                             | 30                                         | 4             | 0                                      | 4                   | 13                             | 28                                         |
| FANCI   | 1             | 1                                      | 2                   | 23                             | 2888                                       | 1             | 1                                      | 2                   | 21                             | 2672                                       |
| FANCL   | 8             | 0                                      | 8                   | 13                             | 793                                        | 7             | 0                                      | 7                   | 12                             | 732                                        |
| FANCM   | 3             | 2                                      | 5                   | 37                             | 715                                        | 3             | 1                                      | 4                   | 32                             | 679                                        |
| RAD51C  | 0             | 0                                      | 0                   | 8                              | 14                                         | 0             | 0                                      | 0                   | 7                              | 14                                         |
| SLX4    | 1             | 0                                      | 1                   | 63                             | 1763                                       | 1             | 0                                      | 1                   | 56                             | 1629                                       |
| CPA1    | 4             | 0                                      | 4                   | 13                             | 1041                                       | 4             | 0                                      | 4                   | 13                             | 976                                        |
| ALK     | 1             | 0                                      | 1                   | 14                             | 6998                                       | 1             | 0                                      | 1                   | 14                             | 6490                                       |
| APC     | 11            | 0                                      | 11                  | 41                             | 5592                                       | 11            | 0                                      | 11                  | 39                             | 5181                                       |
| AXIN2   | 0             | 0                                      | 0                   | 27                             | 2709                                       | 0             | 0                                      | 0                   | 24                             | 2516                                       |
| BAP1    | 1             | 0                                      | 1                   | 5                              | 19                                         | 1             | 0                                      | 1                   | 4                              | 18                                         |
| BLM     | 1             | 3                                      | 4                   | 26                             | 860                                        | 1             | 2                                      | 3                   | 26                             | 806                                        |
| BMPRIA  | 0             | 0                                      | 0                   | 4                              | 388                                        | 0             | 0                                      | 0                   | 3                              | 364                                        |
| BUB1B   | 3             | 0                                      | 3                   | 11                             | 1512                                       | 3             | 0                                      | 3                   | 11                             | 1412                                       |
| CDC73   | 0             | 0                                      | 0                   | 3                              | 0                                          | 0             | 0                                      | 0                   | 3                              | 0                                          |
| CDH1    | 0             | 3                                      | 3                   | 7                              | 852                                        | 0             | 3                                      | 3                   | 7                              | 794                                        |
| CDK4    | 1             | 0                                      | 1                   | 3                              | 0                                          | 1             | 0                                      | 1                   | 3                              | 0                                          |
| CHEK2   | 4             | 6                                      | 10                  | 6                              | 41                                         | 4             | 6                                      | 10                  | 6                              | 38                                         |
| CREBBP  | 0             | 0                                      | 0                   | 36                             | 220                                        | 0             | 0                                      | 0                   | 32                             | 211                                        |
| CYLD    | 0             | 1                                      | 1                   | 3                              | 112                                        | 0             | 1                                      | 1                   | 2                              | 109                                        |
| DDB2    | 0             | 0                                      | 0                   | 2                              | 1280                                       | 0             | 0                                      | 0                   | 2                              | 1190                                       |
| DICER1  | 0             | 0                                      | 0                   | 20                             | 58                                         | 0             | 0                                      | 0                   | 18                             | 54                                         |
| EP300   | 1             | 2                                      | 3                   | 35                             | 1198                                       | 1             | 2                                      | 3                   | 34                             | 1135                                       |
| ERCC2   | 2             | 2                                      | 4                   | 11                             | 2006                                       | 2             | 1                                      | 3                   | 10                             | 1879                                       |
| ERCC3   | 1             | 0                                      | 1                   | 11                             | 9                                          | 1             | 0                                      | 1                   | 11                             | 6                                          |
| ERCC5   | 0             | 0                                      | 0                   | 0                              | 0                                          | 0             | 0                                      | 0                   | 0                              | 0                                          |
| EXT1    | 0             | 2                                      | 2                   | 7                              | 798                                        | 0             | 2                                      | 2                   | 7                              | 752                                        |
| EXT2    | 0             | 0                                      | 0                   | 11                             | 36                                         | 0             | 0                                      | 0                   | 11                             | 34                                         |
| FH      | 1             | 0                                      | 1                   | 3                              | 46                                         | 1             | 0                                      | 1                   | 3                              | 42                                         |
| FLCN    | 1             | 1                                      | 2                   | 18                             | 117                                        | 1             | 1                                      | 2                   | 17                             | 109                                        |
| GPC3    | 0             | 0                                      | 0                   | 7                              | 8                                          | 0             | 0                                      | 0                   | 7                              | 8                                          |
| KIT     | 0             | 0                                      | 0                   | 12                             | 350                                        | 0             | 0                                      | 0                   | 12                             | 317                                        |
| MEN1    | 0             | 0                                      | 0                   | 3                              | 3160                                       | 0             | 0                                      | 0                   | 3                              | 2940                                       |
| MET     | 1             | 0                                      | 1                   | 23                             | 2129                                       | 1             | 0                                      | 1                   | 21                             | 1984                                       |
| MUTYH   | 2             | 0                                      | 2                   | 15                             | 417                                        | 2             | 0                                      | 2                   | 14                             | 388                                        |
| NBN     | 5             | 0                                      | 5                   | 9                              | 1680                                       | 5             | 0                                      | 5                   | 9                              | 1563                                       |
| NF1     | 1             | 0                                      | 1                   | 11                             | 912                                        | 1             | 0                                      | 1                   | 11                             | 860                                        |
| NF2     | 1             | 0                                      | 1                   | 6                              | 0                                          | 1             | 0                                      | 1                   | 5                              | 0                                          |
| PDGFRA  | 0             | 0                                      | 0                   | 21                             | 3271                                       | 0             | 0                                      | 0                   | 20                             | 3016                                       |
| PHOX2B  | 0             | 0                                      | 0                   | 4                              | 62                                         | 0             | 0                                      | 0                   | 4                              | 61                                         |
| PMS1    | 2             | 0                                      | 2                   | 16                             | 28                                         | 2             | 0                                      | 2                   | 16                             | 24                                         |
| POLD1   | 2             | 0                                      | 2                   | 24                             | 524                                        | 1             | 0                                      | 1                   | 21                             | 496                                        |
| POLE    | 0             | 0                                      | 0                   | 58                             | 2384                                       | 0             | 0                                      | 0                   | 55                             | 2209                                       |
| POLH    | 0             | 0                                      | 0                   | 12                             | 145                                        | 0             | 0                                      | 0                   | 12                             | 139                                        |
| POT1    | 0             | 0                                      | 0                   | 12                             | 30                                         | 0             | 0                                      | 0                   | 11                             | 29                                         |
| PRKAR1A | 0             | 0                                      | 0                   | 1                              | 245                                        | 0             | 0                                      | 0                   | 1                              | 232                                        |
| PTCH1   | 1             | 0                                      | 1                   | 30                             | 988                                        | 1             | 0                                      | 1                   | 29                             | 910                                        |
| PTEN    | 0             | 0                                      | 0                   | 1                              | 0                                          | 0             | 0                                      | 0                   | 1                              | 0                                          |
| RB1     | 1             | 0                                      | 1                   | 8                              | 2                                          | 1             | 0                                      | 1                   | 7                              | 2                                          |



|               |            |           |            |             |              |            |           |            |             |              |
|---------------|------------|-----------|------------|-------------|--------------|------------|-----------|------------|-------------|--------------|
| <i>RECQL4</i> | 3          | 0         | 3          | 52          | 4900         | 1          | 0         | 1          | 45          | 4568         |
| <i>RET</i>    | 7          | 0         | 7          | 16          | 3359         | 5          | 0         | 5          | 16          | 3121         |
| <i>SBDS</i>   | 4          | 0         | 4          | 4           | 269          | 4          | 0         | 4          | 4           | 249          |
| <i>SDHAF2</i> | 0          | 0         | 0          | 0           | 0            | 0          | 0         | 0          | 0           | 0            |
| <i>SDHB</i>   | 1          | 0         | 1          | 3           | 1257         | 1          | 0         | 1          | 3           | 1165         |
| <i>SDHC</i>   | 1          | 0         | 1          | 1           | 0            | 1          | 0         | 1          | 1           | 0            |
| <i>SDHD</i>   | 0          | 0         | 0          | 0           | 1287         | 0          | 0         | 0          | 0           | 1195         |
| <i>SMAD4</i>  | 0          | 0         | 0          | 2           | 0            | 0          | 0         | 0          | 2           | 0            |
| <i>SUFU</i>   | 0          | 0         | 0          | 5           | 145          | 0          | 0         | 0          | 5           | 135          |
| <i>TERT</i>   | 10         | 0         | 10         | 11          | 505          | 10         | 0         | 10         | 11          | 473          |
| <i>TSC1</i>   | 0          | 0         | 0          | 12          | 511          | 0          | 0         | 0          | 12          | 479          |
| <i>TSC2</i>   | 0          | 0         | 0          | 13          | 612          | 0          | 0         | 0          | 12          | 570          |
| <i>VHL</i>    | 0          | 0         | 0          | 10          | 0            | 0          | 0         | 0          | 10          | 0            |
| <i>WAS</i>    | 2          | 0         | 2          | 16          | 1            | 2          | 0         | 2          | 16          | 1            |
| <i>WRN</i>    | 1          | 0         | 1          | 44          | 2934         | 1          | 0         | 1          | 41          | 2733         |
| <i>WT1</i>    | 0          | 0         | 0          | 3           | 800          | 0          | 0         | 0          | 3           | 748          |
| <i>XPA</i>    | 0          | 0         | 0          | 3           | 4            | 0          | 0         | 0          | 3           | 3            |
| <i>XPC</i>    | 0          | 0         | 0          | 19          | 2827         | 0          | 0         | 0          | 17          | 2618         |
| <b>Total</b>  | <b>171</b> | <b>43</b> | <b>214</b> | <b>1665</b> | <b>91054</b> | <b>157</b> | <b>37</b> | <b>194</b> | <b>1541</b> | <b>84751</b> |

FPC - familial pancreatic cancer. INDELS - insertion or deletion. SNVs - single nucleotide variants. SVDs - structural variant deletions. VUS - variants of unknown significance.

**Supplementary Table S5.** FPC samples with more than one deleterious variant

| <b>Sample ID</b> | <b>Gene 1</b> | <b>Gene 2</b> | <b>Gene 3</b> | <b>Gene 4</b> | <b>Gene 5</b> |
|------------------|---------------|---------------|---------------|---------------|---------------|
| FPC0025          | <u>FANCA</u>  | RET           | -             | -             | -             |
| FPC0046          | <u>CHEK2</u>  | NF1           | -             | -             | -             |
| FPC0050          | APC           | WAS           | -             | -             | -             |
| FPC0058          | CDKN2A        | ERCC2         | SLX4          | -             | -             |
| FPC0061          | ATM           | RBI           | -             | -             | -             |
| FPC0063          | <u>CHEK2</u>  | <u>FANCA</u>  | -             | -             | -             |
| FPC0075          | <u>BRCA1</u>  | <u>CHEK2</u>  | -             | -             | -             |
| FPC0076          | <u>BLM</u>    | <u>BRCA1</u>  | <u>CDH1</u>   | <u>CHEK2</u>  | <u>FANCD2</u> |
| FPC0091          | RET           | TERT          | -             | -             | -             |
| FPC0126          | ATM           | PALB2         | -             | -             | -             |
| FPC0135          | APC           | BRIP1         | -             | -             | -             |
| FPC0148          | ERCC4         | FANCM         | -             | -             | -             |
| FPC0171          | ATM           | FANCL         | -             | -             | -             |
| FPC0191          | ATM           | RECQL4        | -             | -             | -             |
| FPC0224          | <u>BRCA1</u>  | FANCL         | -             | -             | -             |
| FPC0228          | <u>CYLD</u>   | WAS           | -             | -             | -             |
| FPC0235          | CDKN2A        | WRN           | -             | -             | -             |
| FPC0321          | CDKN2A        | FANCL         | -             | -             | -             |
| FPC0336          | ATM           | TERT          | -             | -             | -             |
| FPC0372          | FANCL         | FH            | -             | -             | -             |
| FPC0472          | BRCA1         | BRCA2         | -             | -             | -             |
| FPC0506          | APC           | BRCA2         | -             | -             | -             |
| FPC0539          | TP53          | TP53          | -             | -             | -             |
| FPC0556          | CDK4          | FLCN          | -             | -             | -             |
| FPC0591          | ATM           | ERCC4         | -             | -             | -             |
| FPC0593          | <u>FANCM</u>  | PTCH1         | -             | -             | -             |
| FPC0622          | BRCA1         | <u>CHEK2</u>  | -             | -             | -             |
| FPC0628          | BRCA1         | BRCA2         | -             | -             | -             |
| FPC0710          | CDKN2A        | RECQL4        | -             | -             | -             |
| FPC0713          | <u>BLM</u>    | <u>BRCA2</u>  | <u>ERCC2</u>  | <u>FANCM</u>  | -             |
| FPC0738          | ATM           | FANCF         | -             | -             | -             |
| FPC0755          | ATM           | BUB1B         | -             | -             | -             |

Underlined gene symbol indicates structural variant deletion. FPC - familial pancreatic cancer

**Supplementary Table S6.** Deleterious variants in BCCS samples

| <b>Gene</b>   | <b>Number of deleterious variants</b> | <b>Number of VUS</b>     | <b>Number of benign variants</b> |
|---------------|---------------------------------------|--------------------------|----------------------------------|
|               | <b>SNVs &amp; INDELS</b>              | <b>SNVs &amp; INDELS</b> | <b>SNVs &amp; INDELS</b>         |
| <i>ATM</i>    | 1                                     | 65                       | 2545                             |
| <i>BRCA1</i>  | 2                                     | 20                       | 4872                             |
| <i>BRCA2</i>  | 6                                     | 40                       | 8077                             |
| <i>CDKN2A</i> | 0                                     | 14                       | 48                               |
| <i>MLH1</i>   | 0                                     | 15                       | 696                              |
| <i>MSH2</i>   | 1                                     | 12                       | 55                               |
| <i>MSH6</i>   | 0                                     | 21                       | 1456                             |
| <i>PALB2</i>  | 0                                     | 29                       | 410                              |
| <i>PMS2</i>   | 0                                     | 6                        | 4025                             |
| <i>PRSS1</i>  | 1                                     | 2                        | 0                                |
| <i>STK11</i>  | 0                                     | 7                        | 7                                |
| <i>TP53</i>   | 0                                     | 3                        | 1472                             |
| <i>BRIP1</i>  | 9                                     | 38                       | 3553                             |
| <i>ERCC4</i>  | 2                                     | 31                       | 872                              |
| <i>FANCA</i>  | 1                                     | 48                       | 3798                             |
| <i>FANCB</i>  | 0                                     | 13                       | 169                              |
| <i>FANCC</i>  | 0                                     | 15                       | 12                               |
| <i>FANCD2</i> | 2                                     | 78                       | 423                              |
| <i>FANCE</i>  | 0                                     | 12                       | 1510                             |
| <i>FANCF</i>  | 1                                     | 8                        | 144                              |
| <i>FANCG</i>  | 1                                     | 12                       | 24                               |
| <i>FANCI</i>  | 2                                     | 33                       | 4061                             |
| <i>FANCL</i>  | 6                                     | 14                       | 1215                             |
| <i>FANCM</i>  | 5                                     | 57                       | 1072                             |
| <i>RAD51C</i> | 0                                     | 18                       | 36                               |
| <i>SLX4</i>   | 0                                     | 65                       | 2902                             |
| <i>CPA1</i>   | 1                                     | 19                       | 1499                             |
| <i>ALK</i>    | 1                                     | 23                       | 9342                             |
| <i>APC</i>    | 4                                     | 55                       | 8698                             |
| <i>AXIN2</i>  | 0                                     | 39                       | 4085                             |
| <i>BAP1</i>   | 0                                     | 3                        | 16                               |
| <i>BLM</i>    | 3                                     | 37                       | 1375                             |
| <i>BMPR1A</i> | 1                                     | 6                        | 432                              |
| <i>BUB1B</i>  | 0                                     | 19                       | 2368                             |
| <i>CDC73</i>  | 0                                     | 2                        | 0                                |
| <i>CDH1</i>   | 0                                     | 14                       | 1314                             |
| <i>CDK4</i>   | 0                                     | 5                        | 2                                |
| <i>CHEK2</i>  | 7                                     | 7                        | 51                               |
| <i>CREBBP</i> | 1                                     | 51                       | 258                              |
| <i>CYLD</i>   | 0                                     | 6                        | 121                              |
| <i>DDB2</i>   | 0                                     | 8                        | 1942                             |
| <i>DICER1</i> | 0                                     | 29                       | 27                               |
| <i>EP300</i>  | 0                                     | 65                       | 1837                             |
| <i>ERCC2</i>  | 1                                     | 18                       | 2887                             |

|                |            |             |               |
|----------------|------------|-------------|---------------|
| <i>ERCC3</i>   | 5          | 14          | 1             |
| <i>ERCC5</i>   | 0          | 0           | 0             |
| <i>EXT1</i>    | 0          | 11          | 1187          |
| <i>EXT2</i>    | 1          | 26          | 26            |
| <i>FH</i>      | 1          | 5           | 51            |
| <i>FLCN</i>    | 1          | 14          | 142           |
| <i>GPC3</i>    | 0          | 24          | 0             |
| <i>KIT</i>     | 0          | 21          | 524           |
| <i>MEN1</i>    | 0          | 5           | 4783          |
| <i>MET</i>     | 0          | 27          | 2716          |
| <i>MUTYH</i>   | 2          | 17          | 654           |
| <i>NBN</i>     | 10         | 25          | 2449          |
| <i>NF1</i>     | 1          | 12          | 1414          |
| <i>NF2</i>     | 0          | 3           | 0             |
| <i>PDGFRA</i>  | 1          | 21          | 4933          |
| <i>PHOX2B</i>  | 1          | 1           | 48            |
| <i>PMS1</i>    | 1          | 21          | 20            |
| <i>POLD1</i>   | 1          | 41          | 557           |
| <i>POLE</i>    | 3          | 71          | 3813          |
| <i>POLH</i>    | 2          | 23          | 194           |
| <i>POT1</i>    | 1          | 25          | 48            |
| <i>PRKARIA</i> | 0          | 2           | 55            |
| <i>PTCH1</i>   | 5          | 42          | 1409          |
| <i>PTEN</i>    | 0          | 1           | 0             |
| <i>RB1</i>     | 0          | 15          | 0             |
| <i>RECQL4</i>  | 0          | 60          | 5592          |
| <i>RET</i>     | 7          | 16          | 5115          |
| <i>SBDS</i>    | 3          | 4           | 359           |
| <i>SDHAF2</i>  | 0          | 1           | 0             |
| <i>SDHB</i>    | 0          | 6           | 1868          |
| <i>SDHC</i>    | 1          | 0           | 0             |
| <i>SDHD</i>    | 0          | 0           | 21            |
| <i>SMAD4</i>   | 0          | 5           | 0             |
| <i>SUFU</i>    | 1          | 6           | 177           |
| <i>TERT</i>    | 8          | 7           | 820           |
| <i>TSC1</i>    | 0          | 16          | 716           |
| <i>TSC2</i>    | 1          | 23          | 968           |
| <i>VHL</i>     | 0          | 15          | 0             |
| <i>WAS</i>     | 0          | 21          | 3             |
| <i>WRN</i>     | 2          | 63          | 4591          |
| <i>WT1</i>     | 0          | 5           | 465           |
| <i>XPA</i>     | 0          | 3           | 0             |
| <i>XPC</i>     | 0          | 21          | 3571          |
| <b>Total</b>   | <b>118</b> | <b>1821</b> | <b>128998</b> |

BCCS - Bipolar Case Control Study. INDELs - insertions and deletions. SNVs - single nucleotide variants. VUS - variants of unknown significance.

**Supplementary Table S7.** Deleterious variants in FPC kindreds and BCCS samples

| Gene          | Number of deleterious variants |                                                     |                      |
|---------------|--------------------------------|-----------------------------------------------------|----------------------|
|               | FPC kindreds (n=593)           | FPC kindreds with $\geq 3$ affected members (n=245) | BCCS samples (n=967) |
| <i>ATM</i>    | 19                             | 9                                                   | 1                    |
| <i>BRCA1</i>  | 7                              | 3                                                   | 2                    |
| <i>BRCA2</i>  | 10                             | 4                                                   | 6                    |
| <i>CDKN2A</i> | 12                             | 7                                                   | 0                    |
| <i>MLH1</i>   | 0                              | 0                                                   | 0                    |
| <i>MSH2</i>   | 0                              | 0                                                   | 1                    |
| <i>MSH6</i>   | 0                              | 0                                                   | 0                    |
| <i>PALB2</i>  | 5                              | 3                                                   | 0                    |
| <i>PMS2</i>   | 0                              | 0                                                   | 0                    |
| <i>PRSS1</i>  | 1                              | 1                                                   | 1                    |
| <i>STK11</i>  | 0                              | 0                                                   | 0                    |
| <i>TP53</i>   | 2                              | 0                                                   | 0                    |
| <i>BRIP1</i>  | 4                              | 1                                                   | 9                    |
| <i>ERCC4</i>  | 4                              | 1                                                   | 2                    |
| <i>FANCA</i>  | 0                              | 0                                                   | 1                    |
| <i>FANCB</i>  | 0                              | 0                                                   | 0                    |
| <i>FANCC</i>  | 3                              | 0                                                   | 0                    |
| <i>FANCD2</i> | 0                              | 0                                                   | 2                    |
| <i>FANCE</i>  | 0                              | 0                                                   | 0                    |
| <i>FANCF</i>  | 2                              | 1                                                   | 1                    |
| <i>FANCG</i>  | 4                              | 1                                                   | 1                    |
| <i>FANCI</i>  | 1                              | 0                                                   | 2                    |
| <i>FANCL</i>  | 7                              | 3                                                   | 6                    |
| <i>FANCM</i>  | 3                              | 0                                                   | 5                    |
| <i>RAD51C</i> | 0                              | 0                                                   | 0                    |
| <i>SLX4</i>   | 1                              | 1                                                   | 0                    |
| <i>CPA1</i>   | 4                              | 0                                                   | 1                    |
| <i>ALK</i>    | 1                              | 1                                                   | 1                    |
| <i>APC</i>    | 11                             | 8                                                   | 4                    |
| <i>AXIN2</i>  | 0                              | 0                                                   | 0                    |
| <i>BAP1</i>   | 1                              | 0                                                   | 0                    |
| <i>BLM</i>    | 1                              | 1                                                   | 3                    |
| <i>BMPR1A</i> | 0                              | 0                                                   | 1                    |
| <i>BUB1B</i>  | 3                              | 3                                                   | 0                    |
| <i>CDC73</i>  | 0                              | 0                                                   | 0                    |
| <i>CDH1</i>   | 0                              | 0                                                   | 0                    |
| <i>CDK4</i>   | 1                              | 0                                                   | 0                    |
| <i>CHEK2</i>  | 4                              | 1                                                   | 7                    |
| <i>CREBBP</i> | 0                              | 0                                                   | 1                    |
| <i>CYLD</i>   | 0                              | 0                                                   | 0                    |
| <i>DDB2</i>   | 0                              | 0                                                   | 0                    |
| <i>DICER1</i> | 0                              | 0                                                   | 0                    |

|                |    |   |    |
|----------------|----|---|----|
| <i>EP300</i>   | 1  | 0 | 0  |
| <i>ERCC2</i>   | 2  | 2 | 1  |
| <i>ERCC3</i>   | 1  | 0 | 5  |
| <i>ERCC5</i>   | 0  | 0 | 0  |
| <i>EXT1</i>    | 0  | 0 | 0  |
| <i>EXT2</i>    | 0  | 0 | 1  |
| <i>FH</i>      | 1  | 1 | 1  |
| <i>FLCN</i>    | 1  | 0 | 1  |
| <i>GPC3</i>    | 0  | 0 | 0  |
| <i>KIT</i>     | 0  | 0 | 0  |
| <i>MEN1</i>    | 0  | 0 | 0  |
| <i>MET</i>     | 1  | 1 | 0  |
| <i>MUTYH</i>   | 2  | 0 | 2  |
| <i>NBN</i>     | 5  | 3 | 10 |
| <i>NF1</i>     | 1  | 1 | 1  |
| <i>NF2</i>     | 1  | 0 | 0  |
| <i>PDGFRA</i>  | 0  | 0 | 1  |
| <i>PHOX2B</i>  | 0  | 0 | 1  |
| <i>PMS1</i>    | 2  | 1 | 1  |
| <i>POLD1</i>   | 1  | 0 | 1  |
| <i>POLE</i>    | 0  | 0 | 3  |
| <i>POLH</i>    | 0  | 0 | 2  |
| <i>POT1</i>    | 0  | 0 | 1  |
| <i>PRKARIA</i> | 0  | 0 | 0  |
| <i>PTCH1</i>   | 1  | 0 | 5  |
| <i>PTEN</i>    | 0  | 0 | 0  |
| <i>RBI</i>     | 1  | 1 | 0  |
| <i>RECQL4</i>  | 1  | 1 | 0  |
| <i>RET</i>     | 5  | 3 | 7  |
| <i>SBDS</i>    | 4  | 2 | 3  |
| <i>SDHAF2</i>  | 0  | 0 | 0  |
| <i>SDHB</i>    | 1  | 1 | 0  |
| <i>SDHC</i>    | 1  | 0 | 1  |
| <i>SDHD</i>    | 0  | 0 | 0  |
| <i>SMAD4</i>   | 0  | 0 | 0  |
| <i>SUFU</i>    | 0  | 0 | 1  |
| <i>TERT</i>    | 10 | 4 | 8  |
| <i>TSC1</i>    | 0  | 0 | 0  |
| <i>TSC2</i>    | 0  | 0 | 1  |
| <i>VHL</i>     | 0  | 0 | 0  |
| <i>WAS</i>     | 2  | 1 | 0  |
| <i>WRN</i>     | 1  | 1 | 2  |
| <i>WT1</i>     | 0  | 0 | 0  |
| <i>XPA</i>     | 0  | 0 | 0  |
| <i>XPC</i>     | 0  | 0 | 0  |

BCCS - Bipolar Case Control Study. FPC - familial pancreatic cancer.

**Supplementary Table S8.** Differences in deleterious variants between FPC kindreds with three or more affected members and BCCS samples

| <b>Genetic Ancestry</b> | <b>Gene</b>   | <b>Deleterious variants in FPC kindred</b> | <b>Deleterious variants in BCCS samples</b> | <b>P-value</b>       |
|-------------------------|---------------|--------------------------------------------|---------------------------------------------|----------------------|
| All (n=245)             | <i>ATM</i>    | 9                                          | 1                                           | 4.4x10 <sup>-6</sup> |
|                         | <i>APC</i>    | 8                                          | 5                                           | 0.0013               |
|                         | <i>BUB1B</i>  | 3                                          | 0                                           | 0.0082               |
|                         | <i>CDKN2A</i> | 7                                          | 0                                           | 1.3x10 <sup>-5</sup> |
|                         | <i>PALB2</i>  | 3                                          | 0                                           | 0.0082               |
| European (n=240)        | <i>ATM</i>    | 9                                          | 1                                           | 3.8x10 <sup>-6</sup> |
|                         | <i>APC</i>    | 8                                          | 5                                           | 0.0012               |
|                         | <i>BUB1B</i>  | 2                                          | 0                                           | 0.0395               |
|                         | <i>CDKN2A</i> | 7                                          | 0                                           | 1.2x10 <sup>-5</sup> |
|                         | <i>PALB2</i>  | 3                                          | 0                                           | 0.0078               |

BCCS - Bipolar Case Control Study. FPC - familial pancreatic cancer.

**Supplementary Table S9.** Private heterozygous PTVs present in all sequenced affected members of a kindred

| <b>Gene</b>     | <b>Number of FPC kindred (n=38) with a shared private heterozygous PTV</b> | <b>Number of private heterozygous PTVs in FPC kindred (n=593)</b> | <b>Number of private heterozygous PTVs in BCCS samples</b> |
|-----------------|----------------------------------------------------------------------------|-------------------------------------------------------------------|------------------------------------------------------------|
| <i>CEP290</i>   | 2                                                                          | 5                                                                 | 5                                                          |
| <i>WDR87</i>    | 2                                                                          | 6                                                                 | 7                                                          |
| <i>ABCB10</i>   | 1                                                                          | 2                                                                 | 0                                                          |
| <i>AGBL1</i>    | 1                                                                          | 2                                                                 | 3                                                          |
| <i>AIG1</i>     | 1                                                                          | 1                                                                 | 0                                                          |
| <i>ATG12</i>    | 1                                                                          | 1                                                                 | 0                                                          |
| <i>ATM</i>      | 1                                                                          | 19                                                                | 1                                                          |
| <i>ATP10B</i>   | 1                                                                          | 4                                                                 | 1                                                          |
| <i>B3GNT8</i>   | 1                                                                          | 1                                                                 | 0                                                          |
| <i>C16orf89</i> | 1                                                                          | 3                                                                 | 0                                                          |
| <i>C1orf123</i> | 1                                                                          | 1                                                                 | 1                                                          |
| <i>C4orf27</i>  | 1                                                                          | 1                                                                 | 0                                                          |
| <i>CDKN2A</i>   | 1                                                                          | 4                                                                 | 0                                                          |
| <i>CHAC2</i>    | 1                                                                          | 1                                                                 | 0                                                          |
| <i>CHPF</i>     | 1                                                                          | 1                                                                 | 1                                                          |
| <i>CNGB1</i>    | 1                                                                          | 1                                                                 | 1                                                          |
| <i>CR1</i>      | 1                                                                          | 1                                                                 | 1                                                          |
| <i>CRIP2</i>    | 1                                                                          | 2                                                                 | 1                                                          |
| <i>CXCL5</i>    | 1                                                                          | 1                                                                 | 0                                                          |
| <i>CXorf40B</i> | 1                                                                          | 1                                                                 | 0                                                          |
| <i>DHX58</i>    | 1                                                                          | 4                                                                 | 3                                                          |
| <i>DNAH6</i>    | 1                                                                          | 5                                                                 | 1                                                          |
| <i>DSC1</i>     | 1                                                                          | 2                                                                 | 0                                                          |
| <i>DUSP28</i>   | 1                                                                          | 1                                                                 | 0                                                          |
| <i>EDN1</i>     | 1                                                                          | 1                                                                 | 0                                                          |
| <i>EGFL6</i>    | 1                                                                          | 1                                                                 | 0                                                          |
| <i>EGR4</i>     | 1                                                                          | 1                                                                 | 0                                                          |
| <i>ENAM</i>     | 1                                                                          | 1                                                                 | 0                                                          |
| <i>ERCC6L</i>   | 1                                                                          | 1                                                                 | 0                                                          |
| <i>FAM136A</i>  | 1                                                                          | 1                                                                 | 0                                                          |
| <i>FAM13A</i>   | 1                                                                          | 1                                                                 | 3                                                          |
| <i>FBXL18</i>   | 1                                                                          | 1                                                                 | 0                                                          |
| <i>FIGNL1</i>   | 1                                                                          | 1                                                                 | 0                                                          |
| <i>GEMIN5</i>   | 1                                                                          | 1                                                                 | 1                                                          |
| <i>GRHPR</i>    | 1                                                                          | 1                                                                 | 0                                                          |
| <i>HACE1</i>    | 1                                                                          | 1                                                                 | 0                                                          |
| <i>HELZ2</i>    | 1                                                                          | 1                                                                 | 1                                                          |
| <i>HEPN1</i>    | 1                                                                          | 1                                                                 | 0                                                          |
| <i>HIF3A</i>    | 1                                                                          | 1                                                                 | 1                                                          |
| <i>HTR5A</i>    | 1                                                                          | 2                                                                 | 0                                                          |
| <i>IDUA</i>     | 1                                                                          | 2                                                                 | 0                                                          |
| <i>INPP5D</i>   | 1                                                                          | 1                                                                 | 0                                                          |
| <i>ISLR2</i>    | 1                                                                          | 1                                                                 | 0                                                          |
| <i>ITIH2</i>    | 1                                                                          | 2                                                                 | 2                                                          |
| <i>KIAA0368</i> | 1                                                                          | 1                                                                 | 2                                                          |
| <i>KRT4</i>     | 1                                                                          | 2                                                                 | 2                                                          |
| <i>LACE1</i>    | 1                                                                          | 1                                                                 | 0                                                          |
| <i>LAG3</i>     | 1                                                                          | 1                                                                 | 0                                                          |
| <i>LCNL1</i>    | 1                                                                          | 1                                                                 | 0                                                          |
| <i>LGALS8</i>   | 1                                                                          | 1                                                                 | 0                                                          |
| <i>LIPT2</i>    | 1                                                                          | 1                                                                 | 0                                                          |
| <i>MANBA</i>    | 1                                                                          | 2                                                                 | 0                                                          |
| <i>MCCC1</i>    | 1                                                                          | 2                                                                 | 1                                                          |
| <i>MCTP2</i>    | 1                                                                          | 5                                                                 | 1                                                          |
| <i>MF12</i>     | 1                                                                          | 3                                                                 | 1                                                          |



|                 |   |   |   |
|-----------------|---|---|---|
| <i>MXRA8</i>    | 1 | 1 | 0 |
| <i>MYBPC2</i>   | 1 | 1 | 0 |
| <i>MYO3B</i>    | 1 | 3 | 1 |
| <i>NDUFA12</i>  | 1 | 1 | 1 |
| <i>NFYA</i>     | 1 | 1 | 0 |
| <i>NOS2</i>     | 1 | 1 | 0 |
| <i>NSG1</i>     | 1 | 1 | 0 |
| <i>NT5E</i>     | 1 | 2 | 0 |
| <i>NUDT1</i>    | 1 | 1 | 0 |
| <i>OPLAH</i>    | 1 | 2 | 1 |
| <i>OR1E1</i>    | 1 | 2 | 1 |
| <i>PCDHGA8</i>  | 1 | 1 | 0 |
| <i>PCP2</i>     | 1 | 1 | 0 |
| <i>PGBD2</i>    | 1 | 1 | 1 |
| <i>PKHD1L1</i>  | 1 | 7 | 9 |
| <i>PLA2G10</i>  | 1 | 1 | 0 |
| <i>PLCD1</i>    | 1 | 2 | 0 |
| <i>PNLIP</i>    | 1 | 1 | 0 |
| <i>POLD1</i>    | 1 | 1 | 1 |
| <i>POLM</i>     | 1 | 1 | 2 |
| <i>POLR1C</i>   | 1 | 1 | 1 |
| <i>POLR3B</i>   | 1 | 2 | 1 |
| <i>PRDM4</i>    | 1 | 1 | 0 |
| <i>PSD2</i>     | 1 | 1 | 1 |
| <i>RABL3</i>    | 1 | 1 | 0 |
| <i>RADIL</i>    | 1 | 1 | 1 |
| <i>RASSF6</i>   | 1 | 1 | 0 |
| <i>RECQL</i>    | 1 | 1 | 2 |
| <i>RGS12</i>    | 1 | 2 | 0 |
| <i>RYR1</i>     | 1 | 4 | 5 |
| <i>SAR1B</i>    | 1 | 1 | 1 |
| <i>SCCPDH</i>   | 1 | 1 | 0 |
| <i>SLC14A1</i>  | 1 | 3 | 0 |
| <i>SLC22A18</i> | 1 | 1 | 0 |
| <i>SLC45A2</i>  | 1 | 2 | 1 |
| <i>SPAG4</i>    | 1 | 4 | 0 |
| <i>SPEM1</i>    | 1 | 1 | 1 |
| <i>SYT15</i>    | 1 | 5 | 3 |
| <i>TAAR5</i>    | 1 | 1 | 0 |
| <i>TACR1</i>    | 1 | 1 | 0 |
| <i>TLR1</i>     | 1 | 2 | 4 |
| <i>TMEM200B</i> | 1 | 1 | 0 |
| <i>TMEM30B</i>  | 1 | 2 | 0 |
| <i>TXNDC5</i>   | 1 | 1 | 1 |
| <i>UNC80</i>    | 1 | 1 | 2 |
| <i>VAT1L</i>    | 1 | 1 | 1 |
| <i>VPS16</i>    | 1 | 1 | 0 |
| <i>ZFP92</i>    | 1 | 1 | 0 |
| <i>ZNF180</i>   | 1 | 2 | 0 |
| <i>ZNF407</i>   | 1 | 2 | 0 |
| <i>ZNF433</i>   | 1 | 2 | 2 |
| <i>ZNF443</i>   | 1 | 1 | 0 |
| <i>ZNF488</i>   | 1 | 2 | 1 |
| <i>ZNF534</i>   | 1 | 1 | 2 |
| <i>ZNF764</i>   | 1 | 2 | 1 |

BCCS - Bipolar Case Control Study. FPC - familial pancreatic cancer. PTVs - premature truncating variants.

**Supplementary Table S10.** Deleterious variants shared between affected members of an FPC kindred

| 1 <sup>st</sup> affected member of kindred | Gene with deleterious variant | Type         | Consequence   | Genomic change <sup>a</sup> | Amino acid change <sup>b</sup> | 2 <sup>nd</sup> affected member of kindred | Deleterious variant present <sup>c</sup> | 3 <sup>rd</sup> affected member of kindred | Deleterious variant present <sup>f</sup> |
|--------------------------------------------|-------------------------------|--------------|---------------|-----------------------------|--------------------------------|--------------------------------------------|------------------------------------------|--------------------------------------------|------------------------------------------|
| FPC0044                                    | <i>BUB1B</i>                  | Deletion     | Frameshift    | g.chr15:40477557_ACAGG>A    | p.fs                           | FPC0679                                    | NP                                       | -                                          | -                                        |
| FPC0105                                    | <i>POLD1</i>                  | Substitution | Splicing      | g.chr19:50887648_G>C        | p.sp                           | FPC0112                                    | P                                        | -                                          | -                                        |
| FPC0171                                    | <i>ATM</i>                    | Substitution | Nonsense      | g.chr11:108124573_C>A       | p.S644X                        | FPC0231                                    | NP                                       | -                                          | -                                        |
| FPC0171                                    | <i>FANCL</i>                  | Deletion     | Frameshift    | g.chr2:58386928_G>GTAAT     | p.fs                           | FPC0231                                    | NP                                       | -                                          | -                                        |
| FPC0347                                    | <i>PALB2</i>                  | Deletion     | Frameshift    | g.chr16:23647356_ATC>A      | p.fs                           | FPC0612                                    | NP                                       | -                                          | -                                        |
| FPC0364                                    | <i>ALK</i>                    | Substitution | Splicing      | g.chr2:29541271_C>T         | p.sp                           | FPC0146                                    | NP                                       | -                                          | -                                        |
| FPC0450                                    | <i>ATM</i>                    | Deletion     | Frameshift    | chr11:108124619_GA>G        | p.fs                           | FPC0505                                    | P                                        | -                                          | -                                        |
| FPC0461                                    | <i>BRCA1</i>                  | Deletion     | Frameshift    | g.chr17:41246849_TAC>T      | p.fs                           | FPC0486                                    | NP                                       | FPC0572                                    | NP                                       |
| FPC0462                                    | <i>CDKN2A</i>                 | Substitution | Nonsynonymous | g.chr9:21971057_C>A         | p.G101W                        | FPC0483                                    | P                                        | -                                          | -                                        |
| FPC0476                                    | <i>CDKN2A</i>                 | Substitution | Nonsense      | g.chr9:21970901_C>A         | p.E153X                        | FPC0497                                    | P                                        | -                                          | -                                        |
| FPC0572                                    | <i>ERCC4</i>                  | Substitution | Nonsynonymous | g.chr16:14041848_C>T        | p.R799W                        | FPC0486                                    | P                                        | FPC0461                                    | NP                                       |
| FPC0689                                    | <i>CDKN2A</i>                 | Substitution | Nonsynonymous | g.chr9:21970981_A>T         | p.V126D                        | FPC0741                                    | P                                        | FPC0687                                    | NP                                       |
| FPC0690                                    | <i>BRIP1</i>                  | Substitution | Nonsynonymous | g.chr17:59937223_G>C        | p.P47A                         | FPC0675                                    | NP                                       | -                                          | -                                        |
| FPC0705                                    | <i>RECQL4</i>                 | Deletion     | Frameshift    | g.chr8:145738491_CAT>C      | p.fs                           | FPC0709                                    | NP                                       | FPC0710                                    | P                                        |
| FPC0709                                    | <i>CDKN2A</i>                 | Substitution | Nonsynonymous | g.chr9:21970981_A>T         | p.V126D                        | FPC0710                                    | P                                        | FPC0705                                    | NP                                       |
| FPC0712                                    | <i>NBN</i>                    | Substitution | Nonsynonymous | g.chr8:90990521_T>C         | p.I171V                        | FPC0713                                    | NP                                       | -                                          | -                                        |
| FPC0718                                    | <i>RET</i>                    | Substitution | Nonsynonymous | g.chr10:43613908_A>T        | p.Y791F                        | FPC0717                                    | P                                        | FPC0719                                    | NP                                       |

FPC - familial pancreatic cancer. <sup>a</sup>Genomic coordinates are in hg19 human genome format and are on the + strand. All changes are heterozygous. g - genomic sequence. <sup>b</sup>p - protein sequence; fs - frameshift; sp - splicing variant. <sup>c</sup>NP - deleterious variant not present in sequenced FPC patient; P - deleterious variant present in sequenced FPC patient.

**Supplementary Table S11.** Somatic mutations in FPC patient tumors

| Sample ID | Gene               | Genomic position <sup>a</sup>      | Amino acid change <sup>b</sup> | Type         | Consequence   |
|-----------|--------------------|------------------------------------|--------------------------------|--------------|---------------|
| Pa102     | <i>AADAC</i>       | chr3_151545829-151545829_C_T       | 357R>C                         | Substitution | Nonsynonymous |
| FPC0625   | <i>ABCA1</i>       | chr9_107556794-107556794_A_        | NA                             | Deletion     | Splicing      |
| FPC0494   | <i>ABCA10</i>      | chr17_67178849-67178849_G_T        | 866Y>X                         | Substitution | Nonsense      |
| FPC0728   | <i>ABCA13</i>      | chr7_48311386-48311386_C_T         | 708A>V                         | Substitution | Nonsynonymous |
| FPC0728   | <i>ABCA13</i>      | chr7_48311639-48311639_A_C         | 792K>N                         | Substitution | Nonsynonymous |
| FPC0070   | <i>ABCA6</i>       | chr17_67109393-67109393_G_A        | 671Q>X                         | Substitution | Nonsense      |
| FPC0728   | <i>ABCA8</i>       | chr17_66913554-66913554_C_T        | 656A>T                         | Substitution | Nonsynonymous |
| Pa229     | <i>ABCC11</i>      | chr16_48264361-48264361_G_A        | 75R>C                          | Substitution | Nonsynonymous |
| FPC0625   | <i>ABCC4</i>       | chr13_95673939-95673939_A_         | NA                             | Deletion     | Splicing      |
| Pa222     | <i>ABCC5</i>       | chr3_183655723-183655723_G_T       | 1274P>T                        | Substitution | Nonsynonymous |
| FPC0751   | <i>ABCC6</i>       | chr16_16269772-16269772_C_T        | 888E>K                         | Substitution | Nonsynonymous |
| Pa231     | <i>ABCG4</i>       | chr11_119024786-119024786_C_G      | 97L>V                          | Substitution | Nonsynonymous |
| FPC0625   | <i>ABI3BP</i>      | chr3_100570788-100570788_A_        | NA                             | Deletion     | Splicing      |
| FPC0625   | <i>ABI3BP</i>      | chr3_100570788-100570788_AA        | NA                             | Insertion    | Splicing      |
| FPC0728   | <i>AC009336.1</i>  | chr2_176993688-176993688_G_A       | 73P>L                          | Substitution | Nonsynonymous |
| FPC0627   | <i>AC034236.1</i>  | chr5_115320315-115320315_C_A       | 296T>N                         | Substitution | Nonsynonymous |
| Pa230     | <i>AC134980.3</i>  | chr15_22319415-22319415_C_T        | 67R>H                          | Substitution | Nonsynonymous |
| FPC0344   | <i>ACACA</i>       | chr17_35487054-35487054_C_T        | 1924D>N                        | Substitution | Nonsynonymous |
| FPC0744   | <i>ACACB</i>       | chr12_109577809-109577809_C_G      | 200S>C                         | Substitution | Nonsynonymous |
| FPC0347   | <i>ACADS</i>       | chr12_121176190-121176190_G_C      | 244E>D                         | Substitution | Nonsynonymous |
| FPC0649   | <i>ACHE</i>        | chr7_100491669-100491669_G_T       | 62A>D                          | Substitution | Nonsynonymous |
| FPC0347   | <i>ACLY</i>        | chr17_40061793-40061793_G_A        | 329R>X                         | Substitution | Nonsense      |
| Pa230     | <i>ACTR10</i>      | chr14_58698990-58698990_TGGGAGGTAA | NA                             | Insertion    | Frameshift    |
| FPC0135   | <i>ACVR1B</i>      | chr12_52370236-52370236_C_T        | 153Q>X                         | Substitution | Nonsense      |
| FPC0728   | <i>ACVR2A</i>      | chr2_148683686-148683686_A_        | NA                             | Deletion     | Frameshift    |
| FPC0745   | <i>ACVR2A</i>      | chr2_148653906-148653907_TT_       | NA                             | Deletion     | Frameshift    |
| Pa229     | <i>ADAM11</i>      | chr17_42837122-42837122_C_T        | 32R>X                          | Substitution | Nonsense      |
| Pa230     | <i>ADAM23</i>      | chr2_207414826-207414826_G_A       | 292R>H                         | Substitution | Nonsynonymous |
| Pa230     | <i>ADAM29</i>      | chr4_175898400-175898400_G_A       | 575R>H                         | Substitution | Nonsynonymous |
| FPC0135   | <i>ADAMTS3</i>     | chr4_73433121-73433121_G_T         | NA                             | Substitution | Splicing      |
| FPC0627   | <i>ADAMTSL2</i>    | chr9_136420796-136420796_G_A       | 465A>T                         | Substitution | Nonsynonymous |
| FPC0344   | <i>ADAT3</i>       | chr19_1912345-1912345_C_           | NA                             | Deletion     | Frameshift    |
| Pa222     | <i>ADCY1</i>       | chr7_45724597-45724597_C_T         | 668T>M                         | Substitution | Nonsynonymous |
| FPC0745   | <i>ADCY7</i>       | chr16_50338848-50338848_C_T        | 525R>C                         | Substitution | Nonsynonymous |
| FPC0747   | <i>ADCY8</i>       | chr8_132052530-132052530_G_T       | 17T>N                          | Substitution | Nonsynonymous |
| FPC0745   | <i>ADD2</i>        | chr2_70910895-70910895_G_A         | 318S>L                         | Substitution | Nonsynonymous |
| FPC0745   | <i>ADD2</i>        | chr2_70919573-70919573_G_A         | 223R>C                         | Substitution | Nonsynonymous |
| FPC0649   | <i>ADIPOQ</i>      | chr3_186571011-186571011_G_A       | 55R>H                          | Substitution | Nonsynonymous |
| FPC0649   | <i>ADPRHL1</i>     | chr13_114077229-114077229_C_T      | 325V>I                         | Substitution | Nonsynonymous |
| FPC0728   | <i>ADRA2B</i>      | chr2_96781506-96781506_C_T         | 128R>H                         | Substitution | Nonsynonymous |
| FPC0625   | <i>ADRA2C</i>      | chr4_3769025-3769025_C_T           | 231A>V                         | Substitution | Nonsynonymous |
| FPC0476   | <i>AFF1</i>        | chr4_87967347-87967347_G_A         | 16R>Q                          | Substitution | Nonsynonymous |
| FPC0135   | <i>AGBL5</i>       | chr2_27278109-27278109_G_A         | 299R>Q                         | Substitution | Nonsynonymous |
| Pa230     | <i>AGPAT3</i>      | chr21_45387878-45387878_C_T        | 77T>M                          | Substitution | Nonsynonymous |
| Pa102     | <i>AGPS</i>        | chr2_178301489-178301489_T_C       | NA                             | Substitution | Splicing      |
| Pa227     | <i>AHSP</i>        | chr16_31539518-31539518_G_A        | 20V>I                          | Substitution | Nonsynonymous |
| FPC0625   | <i>AK9</i>         | chr6_109820315-109820315_C_T       | 1660D>N                        | Substitution | Nonsynonymous |
| FPC0744   | <i>AKNA</i>        | chr9_117105990-117105990_G_A       | 1252A>V                        | Substitution | Nonsynonymous |
| FPC0744   | <i>AKR1C3</i>      | chr10_5144399-5144399_G_A          | 226R>Q                         | Substitution | Nonsynonymous |
| FPC0627   | <i>AL117190.6</i>  | chr14_101302515-101302515_G_A      | 77R>W                          | Substitution | Nonsynonymous |
| FPC0625   | <i>AL365190.16</i> | chr9_84275256-84275256_C_A         | 9V>L                           | Substitution | Nonsynonymous |
| FPC0347   | <i>ALCAM</i>       | chr3_105271329-105271329_G_A       | 522V>M                         | Substitution | Nonsynonymous |
| Pa227     | <i>ALDH3B1</i>     | chr11_67795378-67795378_G_C        | NA                             | Substitution | Splicing      |
| FPC0745   | <i>ALDH9A1</i>     | chr1_165649901-165649901_T_        | NA                             | Deletion     | Frameshift    |
| FPC0737   | <i>ALDOA</i>       | chr16_30081526-30081526_C_T        | 363A>V                         | Substitution | Nonsynonymous |
| Pa227     | <i>ALG9</i>        | chr11_111742145-111742145_C_G      | NA                             | Substitution | Splicing      |
| FPC0649   | <i>ALOX12B</i>     | chr17_7984476-7984476_C_T          | 128V>I                         | Substitution | Nonsynonymous |
| FPC0347   | <i>ALPK3</i>       | chr15_85401414-85401414_A_G        | 1351T>A                        | Substitution | Nonsynonymous |
| FPC0438   | <i>AMER3</i>       | chr2_131519880-131519880_G_A       | 79A>T                          | Substitution | Nonsynonymous |
| FPC0751   | <i>AMER3</i>       | chr2_131521687-131521687_C_A       | 681A>E                         | Substitution | Nonsynonymous |
| FPC0476   | <i>AMOT</i>        | chrX_112065537-112065537_C_A       | 273R>I                         | Substitution | Nonsynonymous |
| FPC0744   | <i>AMOT</i>        | chrX_112058741-112058741_C_G       | 413A>P                         | Substitution | Nonsynonymous |
| Pa227     | <i>AMY2A</i>       | chr1_104166497-104166497_G_C       | 371D>H                         | Substitution | Nonsynonymous |
| Pa230     | <i>ANAPC1</i>      | chr2_112542959-112542959_G_T       | 1632A>D                        | Substitution | Nonsynonymous |
| FPC0652   | <i>ANKDD1B</i>     | chr5_74949004-74949004_G_A         | 218G>D                         | Substitution | Nonsynonymous |

|         |                 |                               |         |              |               |
|---------|-----------------|-------------------------------|---------|--------------|---------------|
| FPC0438 | <i>ANKHD1</i>   | chr5_139884703-139884703_C_T  | NA      | Substitution | Splicing      |
| FPC0751 | <i>ANKRD17</i>  | chr4_73987464-73987464_A_C    | 1169L>V | Substitution | Nonsynonymous |
| FPC0746 | <i>ANKRD40</i>  | chr17_48776867-48776867_G_C   | 224P>R  | Substitution | Nonsynonymous |
| Pa231   | <i>ANKS1B</i>   | chr12_100048865-100048865_C_A | 418G>C  | Substitution | Nonsynonymous |
| FPC0625 | <i>ANO2</i>     | chr12_5708667-5708667_G_A     | 739P>L  | Substitution | Nonsynonymous |
| FPC0746 | <i>ANO2</i>     | chr12_6030300-6030300_G_A     | 143P>L  | Substitution | Nonsynonymous |
| Pa230   | <i>ANO7</i>     | chr2_242140720-242140720_G_A  | 242G>R  | Substitution | Nonsynonymous |
| Pa222   | <i>AP2A1</i>    | chr19_50309015-50309015_C_T   | 878R>C  | Substitution | Nonsynonymous |
| FPC0438 | <i>AP4B1</i>    | chr1_114445487-114445487_G_C  | NA      | Substitution | Splicing      |
| FPC0728 | <i>APCDD1L</i>  | chr20_57036249-57036249_G_A   | 368T>M  | Substitution | Nonsynonymous |
| FPC0625 | <i>APIP</i>     | chr11_34909836-34909836_A_T   | NA      | Substitution | Splicing      |
| FPC0525 | <i>APLP1</i>    | chr19_36370266-36370266_G_T   | 627E>X  | Substitution | Nonsense      |
| FPC0625 | <i>AQP12A</i>   | chr2_241631462-241631462_G_T  | NA      | Deletion     | Frameshift    |
| FPC0627 | <i>AQR</i>      | chr15_35207278-35207278_C_T   | 482R>H  | Substitution | Nonsynonymous |
| Pa102   | <i>ARFGEF1</i>  | chr8_68139458-68139458_T_C    | 1277N>S | Substitution | Nonsynonymous |
| Pa231   | <i>ARHGAP17</i> | chr16_24931459-24931459_C_A   | 880A>S  | Substitution | Nonsynonymous |
| FPC0756 | <i>ARHGAP18</i> | chr6_129899731-129899731_T_A  | 640D>V  | Substitution | Nonsynonymous |
| Pa101   | <i>ARHGAP20</i> | chr11_110450490-110450490_C_A | 1060E>D | Substitution | Nonsynonymous |
| Pa228   | <i>ARHGAP22</i> | chr10_49663160-49663160_G_A   | 226T>M  | Substitution | Nonsynonymous |
| Pa102   | <i>ARHGAP23</i> | chr17_36622972-36622972_C_T   | 256R>C  | Substitution | Nonsynonymous |
| FPC0476 | <i>ARHGAP26</i> | chr5_142281569-142281569_G_T  | 223D>Y  | Substitution | Nonsynonymous |
| Pa231   | <i>ARHGAP27</i> | chr17_43507456-43507456_C_T   | 64V>M   | Substitution | Nonsynonymous |
| Pa227   | <i>ARHGAP44</i> | chr17_12799823-12799823_C_T   | 65R>C   | Substitution | Nonsynonymous |
| FPC0751 | <i>ARHGEF1</i>  | chr19_42396140-42396140_G_T   | 105K>N  | Substitution | Nonsynonymous |
| FPC0476 | <i>ARHGEF4</i>  | chr2_131674239-131674239_C_A  | 577A>E  | Substitution | Nonsynonymous |
| FPC0645 | <i>ARHGEF4</i>  | chr2_131674043-131674043_G_A  | 512G>S  | Substitution | Nonsynonymous |
| FPC0745 | <i>ARHGEF4</i>  | chr2_131673863-131673863_C_T  | 452R>C  | Substitution | Nonsynonymous |
| FPC0070 | <i>ARID1A</i>   | chr1_27101362-27101362_T      | NA      | Insertion    | Frameshift    |
| FPC0745 | <i>ARID1A</i>   | chr1_27087503-27087503_C_T    | 693R>X  | Substitution | Nonsense      |
| Pa102   | <i>ARID1A</i>   | chr1_27093058-27093058_G_A    | NA      | Substitution | Splicing      |
| Pa227   | <i>ARID2</i>    | chr12_46246680-46246680_G_T   | NA      | Substitution | Splicing      |
| FPC0744 | <i>ARID3C</i>   | chr9_34624029-34624029_C_T    | 136R>H  | Substitution | Nonsynonymous |
| Pa231   | <i>ARMC4</i>    | chr10_28229593-28229593_G_A   | 629R>C  | Substitution | Nonsynonymous |
| FPC0737 | <i>ARMCX5</i>   | chrX_101858005-101858005_T_A  | 312F>L  | Substitution | Nonsynonymous |
| FPC0737 | <i>ARR3</i>     | chrX_69489739-69489739_C_T    | 29T>M   | Substitution | Nonsynonymous |
| FPC0494 | <i>ARSK</i>     | chr5_94936704-94936704_A_G    | 417Y>C  | Substitution | Nonsynonymous |
| FPC0494 | <i>ART3</i>     | chr4_77003038-77003038_C_T    | 44T>M   | Substitution | Nonsynonymous |
| FPC0625 | <i>ASB2</i>     | chr14_94423185-94423185_G_A   | 32R>W   | Substitution | Nonsynonymous |
| FPC0747 | <i>ASH1L</i>    | chr1_155408136-155408136_T_G  | 1937E>A | Substitution | Nonsynonymous |
| FPC0737 | <i>ASIC2</i>    | chr17_32483254-32483254_A_G   | 100S>P  | Substitution | Nonsynonymous |
| FPC0625 | <i>ASPH</i>     | chr8_62550925-62550925_A      | NA      | Deletion     | Splicing      |
| FPC0135 | <i>ASTL</i>     | chr2_96799269-96799269_C_T    | 117R>H  | Substitution | Nonsynonymous |
| FPC0494 | <i>ATAD2B</i>   | chr2_24033199-24033199_T_G    | 814E>A  | Substitution | Nonsynonymous |
| Pa222   | <i>ATAD3B</i>   | chr1_1407310-1407310_G_C      | 16A>P   | Substitution | Nonsynonymous |
| FPC0728 | <i>ATF6B</i>    | chr6_32084867-32084867_C_A    | 544K>N  | Substitution | Nonsynonymous |
| Pa228   | <i>ATP10D</i>   | chr4_47538913-47538913_A_G    | 452R>G  | Substitution | Nonsynonymous |
| FPC0347 | <i>ATP8A2</i>   | chr13_26114529-26114529_A_C   | NA      | Substitution | Splicing      |
| FPC0649 | <i>ATRX</i>     | chrX_76939044-76939044_T_G    | 568K>N  | Substitution | Nonsynonymous |
| FPC0625 | <i>AUPI</i>     | chr2_74756112-74756112_A      | NA      | Deletion     | Splicing      |
| Pa229   | <i>B3GALT1</i>  | chr2_168725931-168725931_C_A  | 128Q>K  | Substitution | Nonsynonymous |
| FPC0728 | <i>ADGRB2</i>   | chr1_32193634-32193634_C_T    | 1522V>M | Substitution | Nonsynonymous |
| FPC0751 | <i>ADGRB3</i>   | chr6_70065727-70065727_G_T    | 1190K>N | Substitution | Nonsynonymous |
| FPC0494 | <i>BBS12</i>    | chr4_123664125-123664125_G_C  | 360E>Q  | Substitution | Nonsynonymous |
| FPC0649 | <i>BCAS1</i>    | chr20_52574014-52574014_A_T   | 458I>N  | Substitution | Nonsynonymous |
| Pa231   | <i>BCL2A1</i>   | chr15_80263424-80263424_G_C   | 13A>G   | Substitution | Nonsynonymous |
| Pa228   | <i>BCL6</i>     | chr3_187449532-187449532_A_T  | 116H>Q  | Substitution | Nonsynonymous |
| FPC0726 | <i>BCLAF1</i>   | chr6_136590640-136590640_A_C  | 718S>R  | Substitution | Nonsynonymous |
| Pa222   | <i>BEND4</i>    | chr4_42153742-42153742_G_C    | 140P>R  | Substitution | Nonsynonymous |
| FPC0616 | <i>BICD2</i>    | chr9_95481525-95481525_C_T    | 468A>T  | Substitution | Nonsynonymous |
| FPC0525 | <i>BIN1</i>     | chr2_127821199-127821199_G_A  | 241T>M  | Substitution | Nonsynonymous |
| Pa227   | <i>BIRC6</i>    | chr2_32725000-32725000_A_G    | 2952D>G | Substitution | Nonsynonymous |
| FPC0494 | <i>BOC</i>      | chr3_112992014-112992014_G_A  | 354V>M  | Substitution | Nonsynonymous |
| Pa222   | <i>BOC</i>      | chr3_113002285-113002285_G_A  | 820R>Q  | Substitution | Nonsynonymous |
| Pa229   | <i>BOLL</i>     | chr2_198622125-198622125_C_A  | NA      | Substitution | Splicing      |
| FPC0344 | <i>BPTF</i>     | chr17_65919062-65919064_AGA   | NA      | Deletion     | In-frame      |
| FPC0612 | <i>BRCA2</i>    | chr13_32913342-32913342_G_A   | 1617S>N | Substitution | Nonsynonymous |
| FPC0746 | <i>BRD9</i>     | chr5_891957-891957_T_C        | 22K>R   | Substitution | Nonsynonymous |
| Pa228   | <i>BTBD10</i>   | chr11_13410644-13410644_G_A   | 388R>C  | Substitution | Nonsynonymous |

|         |                  |                               |         |              |               |
|---------|------------------|-------------------------------|---------|--------------|---------------|
| FPC0649 | <i>BTG2</i>      | chr1_203276268-203276268_C_T  | 60S>F   | Substitution | Nonsynonymous |
| Pa102   | <i>BUB1B</i>     | chr15_40505650-40505650_C_G   | 885P>A  | Substitution | Nonsynonymous |
| Pa229   | <i>BZW2</i>      | chr7_16737718-16737718_G_A    | 339E>K  | Substitution | Nonsynonymous |
| FPC0494 | <i>EDRF1</i>     | chr10_127408455-127408455_C_A | 27Q>K   | Substitution | Nonsynonymous |
| FPC0625 | <i>C10orf76</i>  | chr10_103717493-103717493_T_A | NA      | Substitution | Splicing      |
| FPC0745 | <i>C10orf90</i>  | chr10_128147681-128147681_G_C | 609L>V  | Substitution | Nonsynonymous |
| FPC0728 | <i>C11orf87</i>  | chr11_109294667-109294667_G_A | 103R>Q  | Substitution | Nonsynonymous |
| FPC0625 | <i>C14orf169</i> | chr14_73957988-73957988_G_C   | 89R>P   | Substitution | Nonsynonymous |
| FPC0625 | <i>C15orf40</i>  | chr15_83677285-83677285_G_    | NA      | Deletion     | Frameshift    |
| Pa228   | <i>PRR35</i>     | chr16_615266-615266_G_A       | 559A>T  | Substitution | Nonsynonymous |
| FPC0616 | <i>C16orf71</i>  | chr16_4787921-4787921_G_A     | 84A>T   | Substitution | Nonsynonymous |
| FPC0347 | <i>C16orf93</i>  | chr16_30771742-30771742_G_A   | 74P>L   | Substitution | Nonsynonymous |
| Pa231   | <i>C16orf96</i>  | chr16_4638245-4638245_G_A     | 835M>I  | Substitution | Nonsynonymous |
| FPC0759 | <i>C17orf104</i> | chr17_42734592-42734592_C_T   | 56T>I   | Substitution | Nonsynonymous |
| FPC0746 | <i>C17orf97</i>  | chr17_263292-263292_G_A       | 220D>N  | Substitution | Nonsynonymous |
| FPC0759 | <i>C19orf26</i>  | chr19_1235067-1235067_G_A     | 124R>C  | Substitution | Nonsynonymous |
| Pa230   | <i>C1orf100</i>  | chr1_244541771-244541771_C_T  | 52P>L   | Substitution | Nonsynonymous |
| FPC0649 | <i>C1orf147</i>  | chr1_206671019-206671019_G_A  | 11P>L   | Substitution | Nonsynonymous |
| Pa228   | <i>CIART</i>     | chr1_150257038-150257038_G_A  | 185E>K  | Substitution | Nonsynonymous |
| Pa101   | <i>CFAP61</i>    | chr20_20257854-20257854_G_A   | 850V>M  | Substitution | Nonsynonymous |
| Pa101   | <i>CFAP61</i>    | chr20_20269275-20269275_A_C   | 940K>T  | Substitution | Nonsynonymous |
| FPC0135 | <i>C2orf40</i>   | chr2_106694362-106694362_G_A  | 143V>I  | Substitution | Nonsynonymous |
| FPC0747 | <i>C5orf47</i>   | chr5_173416442-173416442_C_A  | 59A>E   | Substitution | Nonsynonymous |
| Pa231   | <i>C6orf10</i>   | chr6_32287756-32287756_A_C    | 194I>R  | Substitution | Nonsynonymous |
| Pa227   | <i>ZBED6CL</i>   | chr7_150027554-150027554_C_T  | 21R>C   | Substitution | Nonsynonymous |
| FPC0747 | <i>CABP2</i>     | chr11_67288598-67288598_C_T   | 93D>N   | Substitution | Nonsynonymous |
| FPC0745 | <i>CACNAIE</i>   | chr1_181705570-181705570_C_T  | 1141P>L | Substitution | Nonsynonymous |
| FPC0616 | <i>CACNAIG</i>   | chr17_48638890-48638890_G_T   | 24D>Y   | Substitution | Nonsynonymous |
| FPC0625 | <i>CACNAIH</i>   | chr16_1259401-1259401_G_A     | 1245D>N | Substitution | Nonsynonymous |
| Pa102   | <i>CACNAIH</i>   | chr16_1259257-1259257_G_A     | 1197E>K | Substitution | Nonsynonymous |
| FPC0747 | <i>CACNAII</i>   | chr22_40056361-40056361_C_T   | 873R>C  | Substitution | Nonsynonymous |
| FPC0747 | <i>CACNAII</i>   | chr22_40066233-40066233_G_A   | 1462R>Q | Substitution | Nonsynonymous |
| Pa230   | <i>CAD</i>       | chr2_27458210-27458210_G_T    | 1295R>L | Substitution | Nonsynonymous |
| FPC0476 | <i>CALCR</i>     | chr7_93055813-93055813_C_T    | 427R>H  | Substitution | Nonsynonymous |
| FPC0747 | <i>CALD1</i>     | chr7_134625945-134625945_G_A  | 497E>K  | Substitution | Nonsynonymous |
| FPC0344 | <i>CAMTA1</i>    | chr1_7723748-7723748_G_A      | 381V>M  | Substitution | Nonsynonymous |
| FPC0625 | <i>CAND1</i>     | chr12_67700248-67700248_G_A   | 934A>T  | Substitution | Nonsynonymous |
| FPC0759 | <i>CANT1</i>     | chr17_76989643-76989643_C_T   | 399E>K  | Substitution | Nonsynonymous |
| FPC0476 | <i>CARD10</i>    | chr22_37900230-37900230_G_A   | 533R>C  | Substitution | Nonsynonymous |
| FPC0751 | <i>CARD10</i>    | chr22_37887388-37887388_G_A   | 970R>W  | Substitution | Nonsynonymous |
| FPC0652 | <i>CASQ2</i>     | chr1_116280945-116280945_G_T  | 144D>E  | Substitution | Nonsynonymous |
| FPC0625 | <i>CATSPERI</i>  | chr11_65792902-65792902_C_T   | 317D>N  | Substitution | Nonsynonymous |
| FPC0344 | <i>CBFA2T3</i>   | chr16_89043142-89043142_G_A   | 25T>M   | Substitution | Nonsynonymous |
| FPC0344 | <i>CBX8</i>      | chr17_77769321-77769321_G_A   | 95R>X   | Substitution | Nonsense      |
| FPC0625 | <i>CCBL1</i>     | chr9_131602898-131602898_T    | NA      | Insertion    | Frameshift    |
| FPC0625 | <i>CCDC109B</i>  | chr4_110606404-110606404_A_T  | NA      | Substitution | Splicing      |
| Pa227   | <i>CCDC114</i>   | chr19_48809565-48809565_G_A   | 168H>Y  | Substitution | Nonsynonymous |
| FPC0525 | <i>CCDC125</i>   | chr5_68599744-68599744_T_G    | 210E>D  | Substitution | Nonsynonymous |
| Pa101   | <i>CCDC13</i>    | chr3_42751216-42751216_C_T    | 650D>N  | Substitution | Nonsynonymous |
| Pa102   | <i>CCDC146</i>   | chr7_76891535-76891535_C_T    | 362R>X  | Substitution | Nonsense      |
| Pa222   | <i>CCDC169</i>   | chr13_36822762-36822762_G_A   | 176Q>X  | Substitution | Nonsense      |
| FPC0616 | <i>CCDC175</i>   | chr14_60027870-60027870_A_    | NA      | Deletion     | Frameshift    |
| FPC0616 | <i>CCDC175</i>   | chr14_60027871-60027871_G_T   | 307L>I  | Substitution | Nonsynonymous |
| FPC0476 | <i>CCDC39</i>    | chr3_180397155-180397155_A_C  | 5F>C    | Substitution | Nonsynonymous |
| Pa231   | <i>CCDC40</i>    | chr17_78064104-78064104_G_T   | 1000C>F | Substitution | Nonsynonymous |
| Pa227   | <i>CCDC53</i>    | chr12_102455125-102455125_C_G | NA      | Substitution | Splicing      |
| FPC0751 | <i>CCDC67</i>    | chr11_93118642-93118642_C_T   | 290R>X  | Substitution | Nonsense      |
| Pa229   | <i>CCDC71</i>    | chr3_49201335-49201335_G_A    | 103P>S  | Substitution | Nonsynonymous |
| Pa227   | <i>CCDC8</i>     | chr19_46914753-46914753_C_G   | 439E>Q  | Substitution | Nonsynonymous |
| FPC0649 | <i>CCDS757.1</i> | chr1_99771529-99771529_C_T    | 419R>X  | Substitution | Nonsense      |
| FPC0625 | <i>CCNC</i>      | chr6_100006296-100006296_A_   | NA      | Deletion     | Frameshift    |
| Pa222   | <i>CCNJ</i>      | chr10_97816872-97816872_C_A   | 203S>Y  | Substitution | Nonsynonymous |
| FPC0728 | <i>CCPG1</i>     | chr15_55652991-55652991_T_G   | 327E>A  | Substitution | Nonsynonymous |
| FPC0759 | <i>CCSER2</i>    | chr10_86259707-86259707_G_A   | 801R>H  | Substitution | Nonsynonymous |
| FPC0525 | <i>CCT7</i>      | chr2_73477492-73477492_G_T    | 377G>C  | Substitution | Nonsynonymous |
| FPC0525 | <i>CD163</i>     | chr12_7639374-7639374_G_A     | 727R>C  | Substitution | Nonsynonymous |
| FPC0744 | <i>CD163L1</i>   | chr12_7525999-7525999_T_A     | 1216H>L | Substitution | Nonsynonymous |
| Pa222   | <i>CD177</i>     | chr19_43859815-43859815_C_G   | 128P>A  | Substitution | Nonsynonymous |

|         |                 |                               |         |              |               |
|---------|-----------------|-------------------------------|---------|--------------|---------------|
| FPC0747 | <i>CD1A</i>     | chr1_158227226-158227226_T_C  | 300V>A  | Substitution | Nonsynonymous |
| FPC0737 | <i>CD44</i>     | chr11_35219748-35219748_T_G   | 293S>A  | Substitution | Nonsynonymous |
| FPC0747 | <i>CD70</i>     | chr19_6586137-6586137_G_A     | 159T>M  | Substitution | Nonsynonymous |
| FPC0745 | <i>CD81</i>     | chr11_2411663-2411663_G_A     | 30G>S   | Substitution | Nonsynonymous |
| FPC0649 | <i>CD93</i>     | chr20_23065343-23065343_C_T   | 496R>H  | Substitution | Nonsynonymous |
| Pa231   | <i>CDC26</i>    | chr9_116029659-116029659_T_C  | 48I>V   | Substitution | Nonsynonymous |
| FPC0746 | <i>CDC42BPB</i> | chr14_103434810-103434810_G_A | 747R>W  | Substitution | Nonsynonymous |
| Pa231   | <i>CDC7</i>     | chr1_91973956-91973956_T_G    | NA      | Substitution | Splicing      |
| Pa102   | <i>CDH19</i>    | chr18_64221714-64221714_T_A   | 180S>C  | Substitution | Nonsynonymous |
| Pa222   | <i>CDH19</i>    | chr18_64172477-64172477_T_C   | 631S>G  | Substitution | Nonsynonymous |
| FPC0737 | <i>CDH2</i>     | chr18_25568548-25568548_G_A   | 561R>X  | Substitution | Nonsense      |
| Pa231   | <i>CDH22</i>    | chr20_44806708-44806708_G_A   | 598R>C  | Substitution | Nonsynonymous |
| FPC0744 | <i>CDH23</i>    | chr10_73466665-73466665_A_T   | 989N>Y  | Substitution | Nonsynonymous |
| Pa230   | <i>CDH3</i>     | chr16_68712450-68712450_C_T   | 146T>M  | Substitution | Nonsynonymous |
| FPC0744 | <i>CDH4</i>     | chr20_60427876-60427876_G_A   | 267V>I  | Substitution | Nonsynonymous |
| FPC0135 | <i>CDH8</i>     | chr16_62055298-62055298_G_A   | 4R>W    | Substitution | Nonsynonymous |
| FPC0745 | <i>CDHR1</i>    | chr10_85961671-85961671_G_A   | 212A>T  | Substitution | Nonsynonymous |
| Pa230   | <i>CDK13</i>    | chr7_40118416-40118416_C_T    | 999R>X  | Substitution | Nonsense      |
| FPC0476 | <i>CDK9</i>     | chr9_130551622-130551622_G_A  | 307D>N  | Substitution | Nonsynonymous |
| FPC0616 | <i>CDKN2A</i>   | chr9_21971194-21971194_C_     | NA      | Deletion     | Frameshift    |
| FPC0746 | <i>CDKN2A</i>   | chr9_21971111-21971111_G_A    | 138A>V  | Substitution | Nonsynonymous |
| Pa102   | <i>CDKN2A</i>   | chr9_21974772-21974773_CC_    | NA      | Deletion     | Frameshift    |
| Pa227   | <i>CDKN2A</i>   | chr9_21971111-21971111_G_A    | 138A>V  | Substitution | Nonsynonymous |
| Pa230   | <i>CDKN2A</i>   | chr9_21971041-21971041_A      | NA      | Insertion    | Frameshift    |
| FPC0625 | <i>CEACAM20</i> | chr19_45016988-45016988_T_G   | 484D>A  | Substitution | Nonsynonymous |
| FPC0625 | <i>CEACAM20</i> | chr19_45016989-45016989_C_T   | 484D>N  | Substitution | Nonsynonymous |
| FPC0494 | <i>CECR2</i>    | chr22_18022353-18022353_C_T   | 819R>X  | Substitution | Nonsense      |
| FPC0627 | <i>CELF1</i>    | chr11_47510493-47510493_C_A   | 25R>M   | Substitution | Nonsynonymous |
| FPC0747 | <i>CELF5</i>    | chr19_3281255-3281255_G_A     | 221R>Q  | Substitution | Nonsynonymous |
| FPC0728 | <i>CELF6</i>    | chr15_72608245-72608245_C_T   | 96A>T   | Substitution | Nonsynonymous |
| FPC0625 | <i>CEP104</i>   | chr1_3759890-3759890_A        | NA      | Insertion    | Splicing      |
| Pa228   | <i>CERS4</i>    | chr19_8326651-8326651_A_T     | 310M>L  | Substitution | Nonsynonymous |
| FPC0625 | <i>CES1</i>     | chr16_55844925-55844925_A     | NA      | Insertion    | Splicing      |
| Pa230   | <i>CFP</i>      | chrX_47486217-47486217_C_T    | 299D>N  | Substitution | Nonsynonymous |
| FPC0627 | <i>CHD5</i>     | chr1_6181216-6181216_G_A      | 1621R>W | Substitution | Nonsynonymous |
| FPC0759 | <i>CHN2</i>     | chr7_29440412-29440412_G_A    | 182V>I  | Substitution | Nonsynonymous |
| FPC0737 | <i>CHRD</i>     | chr3_184104440-184104440_G_A  | 698R>Q  | Substitution | Nonsynonymous |
| FPC0652 | <i>CHRNA1</i>   | chr2_175613343-175613343_C_T  | 428A>T  | Substitution | Nonsynonymous |
| FPC0747 | <i>CHRN2</i>    | chr1_154544311-154544311_G_A  | 338V>I  | Substitution | Nonsynonymous |
| FPC0745 | <i>CHRND</i>    | chr2_233391314-233391314_G_A  | 43R>Q   | Substitution | Nonsynonymous |
| FPC0652 | <i>CIITA</i>    | chr16_11000517-11000517_C_T   | 390R>W  | Substitution | Nonsynonymous |
| Pa227   | <i>CKAP5</i>    | chr11_46780943-46780943_G_A   | 1482R>X | Substitution | Nonsense      |
| FPC0756 | <i>CLCA1</i>    | chr1_86959931-86959931_C_T    | 581S>F  | Substitution | Nonsynonymous |
| FPC0070 | <i>CLDN5</i>    | chr22_19511835-19511835_C_T   | 67A>T   | Substitution | Nonsynonymous |
| FPC0649 | <i>CLK2</i>     | chr1_155234040-155234040_T_C  | 399I>V  | Substitution | Nonsynonymous |
| FPC0744 | <i>CLK4</i>     | chr5_178040820-178040820_T_G  | 189K>N  | Substitution | Nonsynonymous |
| FPC0625 | <i>CNTNAP2</i>  | chr7_147335947-147335947_C_T  | 16S>F   | Substitution | Nonsynonymous |
| FPC0344 | <i>CNTNAP5</i>  | chr2_124999846-124999846_T_C  | 86V>A   | Substitution | Nonsynonymous |
| FPC0347 | <i>CNTROB</i>   | chr17_7846846-7846846_C_T     | NA      | Substitution | Splicing      |
| FPC0494 | <i>COA6</i>     | chr1_234509384-234509384_C_T  | 58R>C   | Substitution | Nonsynonymous |
| FPC0747 | <i>COG2</i>     | chr1_230798923-230798923_G_A  | 113V>I  | Substitution | Nonsynonymous |
| FPC0747 | <i>COL11A1</i>  | chr1_103379210-103379210_C_G  | 1351G>R | Substitution | Nonsynonymous |
| Pa227   | <i>COL11A1</i>  | chr1_103488505-103488505_C_A  | 358E>D  | Substitution | Nonsynonymous |
| Pa228   | <i>COL4A5</i>   | chrX_107849987-107849987_G_A  | 754A>T  | Substitution | Nonsynonymous |
| FPC0745 | <i>COL5A3</i>   | chr19_10071410-10071410_G_A   | 1670R>C | Substitution | Nonsynonymous |
| FPC0627 | <i>COL6A1</i>   | chr21_47421271-47421271_G_A   | 643D>N  | Substitution | Nonsynonymous |
| FPC0744 | <i>COL9A2</i>   | chr1_40767487-40767487_G_C    | 623P>A  | Substitution | Nonsynonymous |
| FPC0525 | <i>COLEC10</i>  | chr8_120079618-120079618_G_A  | 33R>H   | Substitution | Nonsynonymous |
| FPC0745 | <i>COLEC12</i>  | chr18_346619-346619_G_A       | 335R>C  | Substitution | Nonsynonymous |
| FPC0759 | <i>COQ10B</i>   | chr2_198324735-198324735_C_T  | 62R>X   | Substitution | Nonsense      |
| Pa222   | <i>COQ9</i>     | chr16_57481431-57481431_C_T   | 5A>V    | Substitution | Nonsynonymous |
| FPC0625 | <i>CP</i>       | chr3_148901396-148901396_A    | NA      | Deletion     | Splicing      |
| Pa222   | <i>CPB1</i>     | chr3_148562468-148562468_G_A  | 231R>Q  | Substitution | Nonsynonymous |
| Pa222   | <i>CPNE5</i>    | chr6_36713231-36713231_C_T    | 421R>H  | Substitution | Nonsynonymous |
| FPC0347 | <i>CPS1</i>     | chr2_211541772-211541772_C_G  | 1445P>R | Substitution | Nonsynonymous |
| FPC0751 | <i>CPXMI</i>    | chr20_2775081-2775081_A_G     | NA      | Substitution | Splicing      |
| FPC0747 | <i>CREB3L1</i>  | chr11_46299682-46299682_C_T   | 7P>L    | Substitution | Nonsynonymous |
| Pa227   | <i>CREB3L1</i>  | chr11_46342082-46342082_G_T   | NA      | Substitution | Splicing      |

|         |                      |                               |         |              |               |
|---------|----------------------|-------------------------------|---------|--------------|---------------|
| FPC0625 | <i>CREBBP</i>        | chr16_3808053-3808053_A       | NA      | Insertion    | Splicing      |
| Pa229   | <i>CRMP1</i>         | chr4_5841350-5841350_A_T      | 403H>Q  | Substitution | Nonsynonymous |
| FPC0525 | <i>CRYGB</i>         | chr2_209010626-209010626_A_T  | 42C>S   | Substitution | Nonsynonymous |
| Pa231   | <i>CSF2RB</i>        | chr22_37326752-37326752_G_A   | 298G>S  | Substitution | Nonsynonymous |
| Pa222   | <i>CSMD3</i>         | chr8_113332201-113332201_A_T  | 2392L>Q | Substitution | Nonsynonymous |
| FPC0744 | <i>CSNK1A1L</i>      | chr13_37679366-37679366_C_T   | 10E>K   | Substitution | Nonsynonymous |
| FPC0625 | <i>CSNK1G2-AS1</i>   | chr19_1954129-1954129_T_C     | NA      | Substitution | NA            |
| Pa229   | <i>CTD-2611O12.2</i> | chr19_56284090-56284090_G_A   | 137A>T  | Substitution | Nonsynonymous |
| FPC0747 | <i>CTNND1</i>        | chr11_57564206-57564206_G_A   | 233R>Q  | Substitution | Nonsynonymous |
| FPC0745 | <i>CTSD</i>          | chr11_1769246-1769246_G_A     | 63P>L   | Substitution | Nonsynonymous |
| FPC0347 | <i>CTSK</i>          | chr1_150779223-150779223_T_G  | 20E>A   | Substitution | Nonsynonymous |
| Pa222   | <i>CUL1</i>          | chr7_148486871-148486871_G_A  | 543G>R  | Substitution | Nonsynonymous |
| Pa229   | <i>CUL9</i>          | chr6_43164580-43164580_C_T    | 928P>L  | Substitution | Nonsynonymous |
| Pa230   | <i>CUL9</i>          | chr6_43181595-43181595_G_A    | 1878R>H | Substitution | Nonsynonymous |
| Pa229   | <i>CWF19L2</i>       | chr11_107299725-107299725_G_C | 411N>K  | Substitution | Nonsynonymous |
| FPC0494 | <i>CFAP47</i>        | chrX_36337360-36337360_G_     | NA      | Deletion     | Frameshift    |
| FPC0745 | <i>CFAP47</i>        | chrX_36322049-36322049_G_T    | 132V>F  | Substitution | Nonsynonymous |
| FPC0347 | <i>CYP11A1</i>       | chr15_75014615-75014615_T_A   | 275K>M  | Substitution | Nonsynonymous |
| Pa102   | <i>CYP21A2</i>       | chr6_32008184-32008184_T_G    | 314I>S  | Substitution | Nonsynonymous |
| FPC0476 | <i>CYP26B1</i>       | chr2_72360229-72360229_C_T    | 357V>I  | Substitution | Nonsynonymous |
| FPC0746 | <i>CYP46A1</i>       | chr14_100157470-100157470_C_T | 58R>C   | Substitution | Nonsynonymous |
| FPC0728 | <i>DAB1</i>          | chr1_57491653-57491653_C_T    | NA      | Substitution | Splicing      |
| FPC0476 | <i>DCAF12L2</i>      | chrX_125299721-125299721_G_A  | 63R>W   | Substitution | Nonsynonymous |
| FPC0438 | <i>DCAF13</i>        | chr8_104447996-104447996_C_G  | 462P>A  | Substitution | Nonsynonymous |
| FPC0744 | <i>DCC</i>           | chr18_50832036-50832036_G_A   | 667R>H  | Substitution | Nonsynonymous |
| FPC0135 | <i>DCHS1</i>         | chr11_6651374-6651374_G_A     | 1551R>C | Substitution | Nonsynonymous |
| Pa228   | <i>DCHS1</i>         | chr11_6661487-6661487_C_A     | 453R>L  | Substitution | Nonsynonymous |
| Pa231   | <i>DCHS1</i>         | chr11_6646623-6646623_G_A     | 2318P>S | Substitution | Nonsynonymous |
| FPC0745 | <i>DCLK2</i>         | chr4_151000541-151000541_G_A  | 121R>H  | Substitution | Nonsynonymous |
| FPC0744 | <i>DCSTAMP</i>       | chr8_105361496-105361496_G_T  | 239G>V  | Substitution | Nonsynonymous |
| FPC0745 | <i>DDX17</i>         | chr22_38888114-38888114_C_T   | 386R>H  | Substitution | Nonsynonymous |
| FPC0759 | <i>DDX41</i>         | chr5_176942808-176942808_C_T  | 150R>H  | Substitution | Nonsynonymous |
| FPC0745 | <i>DDX42</i>         | chr17_61895418-61895418_A_G   | 826N>S  | Substitution | Nonsynonymous |
| FPC0625 | <i>DDX52</i>         | chr17_35988719-35988719_A_    | NA      | Deletion     | Splicing      |
| FPC0625 | <i>DDX60L</i>        | chr4_169312799-169312799_G    | NA      | Insertion    | Splicing      |
| FPC0625 | <i>DENND3</i>        | chr8_142152436-142152436_G_A  | 141V>I  | Substitution | Nonsynonymous |
| FPC0525 | <i>DGKD</i>          | chr2_234377167-234377167_G_C  | 1175E>Q | Substitution | Nonsynonymous |
| FPC0747 | <i>DGKK</i>          | chrX_50213157-50213157_C_T    | 174R>H  | Substitution | Nonsynonymous |
| Pa101   | <i>DHX34</i>         | chr19_47870310-47870310_A_G   | 556T>A  | Substitution | Nonsynonymous |
| Pa102   | <i>DHX34</i>         | chr19_47870310-47870310_A_G   | 556T>A  | Substitution | Nonsynonymous |
| FPC0745 | <i>DHX57</i>         | chr2_39082255-39082255_T_C    | 617R>G  | Substitution | Nonsynonymous |
| Pa231   | <i>DIDO1</i>         | chr20_61511246-61511246_G_A   | 2021P>L | Substitution | Nonsynonymous |
| FPC0745 | <i>DKFZP686J1910</i> | chr16_81183402-81183402_C_T   | 1549R>H | Substitution | Nonsynonymous |
| FPC0728 | <i>DKFZP779J2370</i> | chr15_100256986-100256986_G_A | 6P>L    | Substitution | Nonsynonymous |
| FPC0744 | <i>DLC1</i>          | chr8_13356764-13356764_C_T    | 273D>N  | Substitution | Nonsynonymous |
| FPC0746 | <i>DLGAP3</i>        | chr1_35370171-35370171_C_T    | 272G>S  | Substitution | Nonsynonymous |
| Pa230   | <i>DMBT1</i>         | chr10_124347988-124347988_C_T | 597R>C  | Substitution | Nonsynonymous |
| FPC0737 | <i>DNAH10</i>        | chr12_124416293-124416293_G_A | 4225G>R | Substitution | Nonsynonymous |
| FPC0737 | <i>DNAH11</i>        | chr7_21857903-21857903_C_T    | 3553T>M | Substitution | Nonsynonymous |
| FPC0759 | <i>DNAH5</i>         | chr5_13885215-13885215_G_A    | 956R>C  | Substitution | Nonsynonymous |
| FPC0525 | <i>DNAH6</i>         | chr2_84831556-84831556_G_A    | 988E>K  | Substitution | Nonsynonymous |
| FPC0625 | <i>DNAH7</i>         | chr2_196762492-196762492_A    | NA      | Insertion    | Splicing      |
| FPC0747 | <i>DNAH7</i>         | chr2_196642630-196642630_C_T  | 3653R>H | Substitution | Nonsynonymous |
| FPC0747 | <i>DNAH7</i>         | chr2_196661344-196661344_G_C  | 3491H>D | Substitution | Nonsynonymous |
| Pa230   | <i>DNAH7</i>         | chr2_196659235-196659235_C_G  | 3515D>H | Substitution | Nonsynonymous |
| FPC0652 | <i>DNAH9</i>         | chr17_11593283-11593283_C_T   | 1382R>W | Substitution | Nonsynonymous |
| FPC0627 | <i>DNAJC10</i>       | chr2_183593653-183593653_G_T  | 189D>Y  | Substitution | Nonsynonymous |
| Pa222   | <i>DNAJC17</i>       | chr15_41068494-41068494_C_A   | NA      | Substitution | Splicing      |
| FPC0525 | <i>DNHD1</i>         | chr11_6540881-6540881_A_C     | 482N>H  | Substitution | Nonsynonymous |
| FPC0751 | <i>DNMT3L</i>        | chr21_45671514-45671514_C_T   | 254R>H  | Substitution | Nonsynonymous |
| Pa222   | <i>DOK3</i>          | chr5_176931211-176931211_C_T  | 422G>S  | Substitution | Nonsynonymous |
| FPC0728 | <i>DOTIL</i>         | chr19_2207621-2207621_C_T     | 302S>L  | Substitution | Nonsynonymous |
| Pa101   | <i>DPP3</i>          | chr11_66261057-66261057_G_A   | 448G>S  | Substitution | Nonsynonymous |
| FPC0747 | <i>DPP7</i>          | chr9_140007735-140007735_A_G  | 209F>S  | Substitution | Nonsynonymous |
| FPC0745 | <i>DRD1</i>          | chr5_174869961-174869961_C_A  | 48V>F   | Substitution | Nonsynonymous |
| FPC0728 | <i>DUSP16</i>        | chr12_12630227-12630227_T     | NA      | Insertion    | Frameshift    |
| FPC0744 | <i>DVL1</i>          | chr1_1275456-1275456_C_T      | 291A>T  | Substitution | Nonsynonymous |
| FPC0135 | <i>DVL3</i>          | chr3_183888334-183888335_CA_  | NA      | Deletion     | Frameshift    |

|         |                 |                               |         |              |               |
|---------|-----------------|-------------------------------|---------|--------------|---------------|
| FPC0625 | <i>DYNC1L1I</i> | chr3_32571824-32571824_A_     | NA      | Deletion     | Splicing      |
| Pa101   | <i>DYNC2H1</i>  | chr11_103019309-103019309_A_T | 970N>I  | Substitution | Nonsynonymous |
| Pa231   | <i>DYNC2H1</i>  | chr11_103074479-103074479_G_A | 2762G>E | Substitution | Nonsynonymous |
| FPC0652 | <i>DYTN</i>     | chr2_207569605-207569605_G_A  | 149R>X  | Substitution | Nonsense      |
| Pa228   | <i>EBF1</i>     | chr5_158139342-158139342_C_A  | NA      | Substitution | Splicing      |
| FPC0736 | <i>EBNA1BP2</i> | chr1_43634675-43634675_G_A    | 158Q>X  | Substitution | Nonsense      |
| FPC0625 | <i>ECD</i>      | chr10_74906123-74906123_A_    | NA      | Deletion     | Splicing      |
| Pa231   | <i>ECD</i>      | chr10_74906123-74906123_A_    | NA      | Deletion     | Splicing      |
| Pa230   | <i>EFCAB13</i>  | chr17_45451876-45451876_G_C   | 306D>H  | Substitution | Nonsynonymous |
| FPC0737 | <i>EFCAB7</i>   | chr1_63999206-63999206_C_T    | 190R>C  | Substitution | Nonsynonymous |
| Pa228   | <i>MICU3</i>    | chr8_16961950-16961950_C_A    | 345H>Q  | Substitution | Nonsynonymous |
| Pa222   | <i>EHBP1</i>    | chr2_63053349-63053349_C_T    | 147S>F  | Substitution | Nonsynonymous |
| FPC0625 | <i>EI24</i>     | chr11_125452295-125452295_C_A | 243Q>K  | Substitution | Nonsynonymous |
| FPC0625 | <i>EI24</i>     | chr11_125452298-125452298_A_G | 244R>G  | Substitution | Nonsynonymous |
| FPC0494 | <i>EIF2AK3</i>  | chr2_88890353-88890353_G_T    | 329L>M  | Substitution | Nonsynonymous |
| Pa222   | <i>EIF2B2</i>   | chr14_75469811-75469811_G_A   | 40G>R   | Substitution | Nonsynonymous |
| FPC0728 | <i>AGO2</i>     | chr8_141566117-141566117_T_A  | 383M>L  | Substitution | Nonsynonymous |
| FPC0751 | <i>EIF2S3L</i>  | chr12_10658881-10658881_T_A   | 127V>D  | Substitution | Nonsynonymous |
| Pa231   | <i>EIF3A</i>    | chr10_120829141-120829141_A_C | 256I>S  | Substitution | Nonsynonymous |
| FPC0728 | <i>ELF4</i>     | chrX_129205124-129205124_G_A  | 234R>X  | Substitution | Nonsense      |
| Pa102   | <i>ELMO2</i>    | chr20_45023111-45023111_G_A   | 4P>L    | Substitution | Nonsynonymous |
| FPC0525 | <i>EP400</i>    | chr12_132496183-132496183_T_  | NA      | Deletion     | Splicing      |
| FPC0625 | <i>EPB41L4B</i> | chr9_112069508-112069508_T_   | NA      | Deletion     | Frameshift    |
| FPC0652 | <i>EPHA6</i>    | chr3_97356828-97356828_C_T    | 896R>W  | Substitution | Nonsynonymous |
| FPC0135 | <i>EPHA8</i>    | chr1_22927533-22927533_C_T    | 894A>V  | Substitution | Nonsynonymous |
| Pa227   | <i>EPHB1</i>    | chr3_134851891-134851891_G_A  | 433A>T  | Substitution | Nonsynonymous |
| FPC0652 | <i>EPHB4</i>    | chr7_100417826-100417826_C_T  | 301V>I  | Substitution | Nonsynonymous |
| FPC0525 | <i>EPS8</i>     | chr12_15819395-15819395_T_G   | 193K>T  | Substitution | Nonsynonymous |
| Pa227   | <i>EPT1</i>     | chr2_26587719-26587719_C_T    | 49A>V   | Substitution | Nonsynonymous |
| FPC0625 | <i>ERAP1</i>    | chr5_96116124-96116124_T_A    | NA      | Substitution | Splicing      |
| FPC0625 | <i>ERAP1</i>    | chr5_96116125-96116125_A_C    | NA      | Substitution | Splicing      |
| Pa227   | <i>ERF</i>      | chr19_42754571-42754571_T_C   | 57I>V   | Substitution | Nonsynonymous |
| Pa231   | <i>ERLIN1</i>   | chr10_101911899-101911899_T_G | 346S>R  | Substitution | Nonsynonymous |
| Pa222   | <i>ESPNL</i>    | chr2_239025571-239025571_G_A  | 295V>M  | Substitution | Nonsynonymous |
| Pa222   | <i>EVC</i>      | chr4_5803782-5803782_C_A      | 804H>N  | Substitution | Nonsynonymous |
| FPC0652 | <i>EVPL</i>     | chr17_74015057-74015057_G_A   | 408R>X  | Substitution | Nonsense      |
| FPC0726 | <i>EVPL</i>     | chr17_74011034-74011034_C_T   | 729D>N  | Substitution | Nonsynonymous |
| Pa222   | <i>EXOC3L1</i>  | chr16_67221600-67221600_C_T   | 190G>R  | Substitution | Nonsynonymous |
| FPC0652 | <i>EXOC6</i>    | chr10_94608375-94608375_G_A   | 29V>M   | Substitution | Nonsynonymous |
| Pa222   | <i>EXOC8</i>    | chr1_231472042-231472042_C_T  | 484G>S  | Substitution | Nonsynonymous |
| FPC0438 | <i>EXOSC9</i>   | chr4_122737994-122737995_AA_  | NA      | Deletion     | Frameshift    |
| FPC0627 | <i>EYS</i>      | chr6_66042308-66042308_C_A    | 590R>I  | Substitution | Nonsynonymous |
| Pa102   | <i>F2</i>       | chr11_46750254-46750254_A_T   | 447I>F  | Substitution | Nonsynonymous |
| FPC0476 | <i>F7</i>       | chr13_113771857-113771857_C_T | 251A>V  | Substitution | Nonsynonymous |
| FPC0135 | <i>FAM109A</i>  | chr12_111801054-111801054_C_T | 60V>I   | Substitution | Nonsynonymous |
| Pa222   | <i>FAM111B</i>  | chr11_58893567-58893567_C_G   | 666T>S  | Substitution | Nonsynonymous |
| FPC0525 | <i>FAM117B</i>  | chr2_203589708-203589708_G_C  | 30W>C   | Substitution | Nonsynonymous |
| FPC0070 | <i>FAM122A</i>  | chr9_71395486-71395486_C_G    | 136R>G  | Substitution | Nonsynonymous |
| FPC0744 | <i>FAM135A</i>  | chr6_71235687-71235687_T_G    | 771L>X  | Substitution | Nonsense      |
| FPC0625 | <i>FAM171B</i>  | chr2_187626520-187626520_C_A  | 484S>Y  | Substitution | Nonsynonymous |
| FPC0476 | <i>FAM194A</i>  | chr3_68802094-68802094_T_A    | 69E>V   | Substitution | Nonsynonymous |
| FPC0745 | <i>FAM205BP</i> | chr9_34837695-34837695_C_T    | 49R>H   | Substitution | Nonsynonymous |
| FPC0476 | <i>FAM209B</i>  | chr20_55108525-55108525_G_A   | 43R>Q   | Substitution | Nonsynonymous |
| FPC0627 | <i>FAM46A</i>   | chr6_82461365-82461365_A_T    | 165L>Q  | Substitution | Nonsynonymous |
| FPC0728 | <i>BRINP3</i>   | chr1_190067891-190067891_G_A  | 520R>C  | Substitution | Nonsynonymous |
| Pa227   | <i>FAM63B</i>   | chr15_59064335-59064335_G_A   | 247W>X  | Substitution | Nonsense      |
| FPC0625 | <i>FANCM</i>    | chr14_45605618-45605618_C_G   | 128F>L  | Substitution | Nonsynonymous |
| FPC0737 | <i>FANCM</i>    | chr14_45645877-45645877_A_G   | 1307Y>C | Substitution | Nonsynonymous |
| FPC0070 | <i>FAT1</i>     | chr4_187549490-187549490_C_T  | 1543R>H | Substitution | Nonsynonymous |
| FPC0344 | <i>FAT2</i>     | chr5_150925292-150925292_A_G  | 1799L>S | Substitution | Nonsynonymous |
| FPC0744 | <i>FAT2</i>     | chr5_150905452-150905452_G_   | NA      | Insertion    | Frameshift    |
| FPC0747 | <i>FAT4</i>     | chr4_126412015-126412015_C_T  | 4680Q>X | Substitution | Nonsense      |
| FPC0344 | <i>FBLL1</i>    | chr5_167957374-167957374_G_T  | 289A>S  | Substitution | Nonsynonymous |
| FPC0737 | <i>FBLN1</i>    | chr22_45996196-45996196_G_A   | 661R>H  | Substitution | Nonsynonymous |
| Pa222   | <i>FBN1</i>     | chr15_48805784-48805784_G_A   | 517A>V  | Substitution | Nonsynonymous |
| FPC0070 | <i>FBN2</i>     | chr5_127609637-127609637_G_A  | 2579P>S | Substitution | Nonsynonymous |
| FPC0746 | <i>FBN2</i>     | chr5_127636565-127636565_C_G  | 2037G>A | Substitution | Nonsynonymous |
| Pa102   | <i>FBN2</i>     | chr5_127681205-127681205_G_A  | 1021R>C | Substitution | Nonsynonymous |



|         |                 |                                                    |         |              |               |
|---------|-----------------|----------------------------------------------------|---------|--------------|---------------|
| FPC0652 | <i>FBXL13</i>   | chr7_102518899-102518899_T_A                       | NA      | Substitution | Splicing      |
| FPC0747 | <i>FBXO21</i>   | chr12_117610387-117610387_G_C                      | 301P>R  | Substitution | Nonsynonymous |
| FPC0746 | <i>FBXO46</i>   | chr19_46215346-46215346_G_A                        | 470R>X  | Substitution | Nonsense      |
| FPC0744 | <i>FCRL4</i>    | chr1_157559038-157559038_C_A                       | 88R>L   | Substitution | Nonsynonymous |
| FPC0625 | <i>FCRL5</i>    | chr1_157504348-157504348_A_T                       | 579H>Q  | Substitution | Nonsynonymous |
| FPC0625 | <i>FCRL5</i>    | chr1_157504349-157504349_T_G                       | 579H>P  | Substitution | Nonsynonymous |
| Pa230   | <i>FEMIC</i>    | chr5_114860151-114860151_C_T                       | 570E>K  | Substitution | Nonsynonymous |
| Pa230   | <i>FFARI</i>    | chr19_35842813-35842813_C_T                        | 120P>L  | Substitution | Nonsynonymous |
| FPC0476 | <i>FGD1</i>     | chrX_54475297-54475297_G_C                         | 793P>R  | Substitution | Nonsynonymous |
| Pa222   | <i>FGF5</i>     | chr4_81207633-81207633_G_A                         | 205R>Q  | Substitution | Nonsynonymous |
| FPC0747 | <i>FGFR2</i>    | chr10_123325147-123325147_G_A                      | 61R>C   | Substitution | Nonsynonymous |
| FPC0070 | <i>FGL1</i>     | chr8_17731940-17731940_C_A                         | 112C>F  | Substitution | Nonsynonymous |
| FPC0347 | <i>FKRP</i>     | chr19_47258728-47258728_G_C                        | 7Q>H    | Substitution | Nonsynonymous |
| FPC0627 | <i>FLCN</i>     | chr17_17118616-17118616_C_T                        | 439V>M  | Substitution | Nonsynonymous |
| FPC0751 | <i>FLNC</i>     | chr7_128485276-128485276_G_A                       | 1253V>I | Substitution | Nonsynonymous |
| FPC0347 | <i>FLT1</i>     | chr13_29005314-29005314_C_G                        | 316G>A  | Substitution | Nonsynonymous |
| FPC0625 | <i>FLT4</i>     | chr5_180046492-180046492_C_G                       | NA      | Substitution | Splicing      |
| FPC0625 | <i>FLT4</i>     | chr5_180046493-180046493_A_G                       | NA      | Substitution | Splicing      |
| FPC0625 | <i>FLT4</i>     | chr5_180046494-180046494_G_C                       | NA      | Substitution | Splicing      |
| FPC0748 | <i>FLVCR1</i>   | chr1_213032419-213032419_T                         | NA      | Insertion    | Frameshift    |
| Pa229   | <i>FMO3</i>     | chr1_171083479-171083479_G_A                       | 387R>H  | Substitution | Nonsynonymous |
| FPC0347 | <i>FOXB2</i>    | chr9_79634892-79634892_C_T                         | 108R>C  | Substitution | Nonsynonymous |
| FPC0494 | <i>FREM3</i>    | chr4_144614358-144614358_A_                        | NA      | Deletion     | Splicing      |
| FPC0627 | <i>FSCN1</i>    | chr7_5632959-5632959_A_C                           | 131K>T  | Substitution | Nonsynonymous |
| FPC0476 | <i>FSHR</i>     | chr2_49190290-49190290_C_T                         | 557R>Q  | Substitution | Nonsynonymous |
| FPC0625 | <i>FUBP1</i>    | chr1_78435702-78435702_A_                          | NA      | Deletion     | Splicing      |
| Pa227   | <i>FUT7</i>     | chr9_139926078-139926078_C_T                       | 38R>Q   | Substitution | Nonsynonymous |
| FPC0652 | <i>GABBR1</i>   | chr6_29589534-29589534_A_                          | NA      | Insertion    | Frameshift    |
| FPC0745 | <i>GABRA6</i>   | chr5_161115971-161115971_T                         | NA      | Insertion    | Frameshift    |
| Pa102   | <i>GABRB3</i>   | chr15_26866684-26866684_G_T                        | NA      | Substitution | Splicing      |
| Pa228   | <i>GAD2</i>     | chr10_26518619-26518619_G_C                        | 251M>I  | Substitution | Nonsynonymous |
| FPC0476 | <i>GAL3ST3</i>  | chr11_65811101-65811101_G_A                        | 58P>L   | Substitution | Nonsynonymous |
| FPC0737 | <i>GALNT10</i>  | chr5_153765887-153765887_C_T                       | 318A>V  | Substitution | Nonsynonymous |
| FPC0747 | <i>GALNT14</i>  | chr2_31215798-31215798_C_T                         | 69V>I   | Substitution | Nonsynonymous |
| Pa101   | <i>GALNT16</i>  | chr14_69800300-69800300_G                          | NA      | Insertion    | Frameshift    |
| FPC0728 | <i>GAMT</i>     | chr19_1399000-1399000_G_A                          | 162P>L  | Substitution | Nonsynonymous |
| FPC0135 | <i>GANC</i>     | chr15_42584990-42584990_C_G                        | 129D>E  | Substitution | Nonsynonymous |
| FPC0625 | <i>GAS2</i>     | chr11_22770667-22770667_T_A                        | 159Y>N  | Substitution | Nonsynonymous |
| FPC0347 | <i>GBAP1</i>    | chr1_155186379-155186379_C_G                       | 143Q>H  | Substitution | Nonsynonymous |
| FPC0476 | <i>GEMIN5</i>   | chr5_154296637-154296637_GCT                       | NA      | Insertion    | In-frame      |
| FPC0627 | <i>GFM1</i>     | chr3_158364654-158364654_C_T                       | 164R>C  | Substitution | Nonsynonymous |
| FPC0746 | <i>GN</i>       | chr19_38877043-38877043_C_T                        | 287E>K  | Substitution | Nonsynonymous |
| FPC0649 | <i>GIPC1</i>    | chr19_14589561-14589561_T_C                        | 262E>G  | Substitution | Nonsynonymous |
| FPC0747 | <i>GIPR</i>     | chr19_46180341-46180341_C_A                        | 256F>L  | Substitution | Nonsynonymous |
| Pa229   | <i>GJA3</i>     | chr13_20717051-20717051_G_A                        | 126P>L  | Substitution | Nonsynonymous |
| FPC0751 | <i>GJA9</i>     | chr1_39340662-39340662_T_G                         | 370K>T  | Substitution | Nonsynonymous |
| FPC0747 | <i>GKN1</i>     | chr2_69207157-69207157_G_A                         | 157R>H  | Substitution | Nonsynonymous |
| FPC0616 | <i>GLI3</i>     | chr7_42004662-42004662_C_T                         | 1337A>T | Substitution | Nonsynonymous |
| FPC0746 | <i>GLI3</i>     | chr7_42011982-42011982_C_T                         | 686R>Q  | Substitution | Nonsynonymous |
| FPC0347 | <i>GLS</i>      | chr2_191792051-191792051_C_T                       | 423T>I  | Substitution | Nonsynonymous |
| Pa101   | <i>GMIP</i>     | chr19_19754323-19754323_G_A                        | 6P>S    | Substitution | Nonsynonymous |
| Pa231   | <i>GNB2</i>     | chr7_100276335-100276335_G_A                       | 312D>N  | Substitution | Nonsynonymous |
| Pa229   | <i>GOLGA4</i>   | chr3_37368043-37368069_GATATTGAACACAAAGAATTGGTTTNA | NA      | Deletion     | In-frame      |
| FPC0745 | <i>GOLGA6L2</i> | chr15_23686803-23686803_C_G                        | 273E>D  | Substitution | Nonsynonymous |
| FPC0494 | <i>GPAT2</i>    | chr2_96688929-96688929_G_A                         | 692R>C  | Substitution | Nonsynonymous |
| FPC0751 | <i>GPC4</i>     | chrX_132437297-132437297_G_T                       | 455S>R  | Substitution | Nonsynonymous |
| FPC0737 | <i>GPC5</i>     | chr13_92346053-92346053_G_A                        | 313G>E  | Substitution | Nonsynonymous |
| Pa102   | <i>GPCPD1</i>   | chr20_5560671-5560671_T_A                          | 152L>F  | Substitution | Nonsynonymous |
| FPC0135 | <i>GPM6B</i>    | chrX_13834996-13834996_C_T                         | 10E>K   | Substitution | Nonsynonymous |
| FPC0347 | <i>ADGRG4</i>   | chrX_135474445-135474447_GAT_                      | NA      | Deletion     | In-frame      |
| FPC0625 | <i>ADGRA3</i>   | chr4_22457447-22457447_A_G                         | 4V>A    | Substitution | Nonsynonymous |
| FPC0649 | <i>ADGRD1</i>   | chr12_131569149-131569149_G_A                      | 538V>I  | Substitution | Nonsynonymous |
| FPC0347 | <i>GPR142</i>   | chr17_72363807-72363807_T                          | NA      | Insertion    | Frameshift    |
| FPC0616 | <i>GPR156</i>   | chr3_119892225-119892225_C_A                       | 342Q>H  | Substitution | Nonsynonymous |
| FPC0725 | <i>GPR32</i>    | chr19_51274851-51274851_A_C                        | 332T>P  | Substitution | Nonsynonymous |
| FPC0737 | <i>GPR39</i>    | chr2_133402940-133402940_C_T                       | 375R>C  | Substitution | Nonsynonymous |
| FPC0476 | <i>GPR50</i>    | chrX_150349064-150349064_C_T                       | 337R>C  | Substitution | Nonsynonymous |
| Pa227   | <i>ADGRV1</i>   | chr5_89943537-89943537_C_T                         | 1082P>L | Substitution | Nonsynonymous |

|         |                 |                                            |         |              |               |
|---------|-----------------|--------------------------------------------|---------|--------------|---------------|
| FPC0476 | <i>GPRASP2</i>  | chrX_101971979-101971979_A_G               | 728T>A  | Substitution | Nonsynonymous |
| FPC0751 | <i>GRAMD1B</i>  | chr11_123448093-123448093_C                | NA      | Insertion    | Frameshift    |
| FPC0744 | <i>GRB10</i>    | chr7_50737441-50737441_G_A                 | 161P>L  | Substitution | Nonsynonymous |
| Pa231   | <i>GRB14</i>    | chr2_165365366-165365366_A                 | NA      | Insertion    | Splicing      |
| FPC0649 | <i>GRIA2</i>    | chr4_158281129-158281129_G_A               | 709E>K  | Substitution | Nonsynonymous |
| FPC0625 | <i>GRIA3</i>    | chrX_122336604-122336604_C_G               | 129P>A  | Substitution | Nonsynonymous |
| FPC0737 | <i>GRID1</i>    | chr10_87966324-87966324_G_A                | 106T>M  | Substitution | Nonsynonymous |
| FPC0438 | <i>GRID2IP</i>  | chr7_6565891-6565891_C_T                   | 295G>S  | Substitution | Nonsynonymous |
| FPC0737 | <i>GRIK4</i>    | chr11_120833172-120833172_G_A              | 683R>H  | Substitution | Nonsynonymous |
| FPC0751 | <i>GRIPAP1</i>  | chrX_48844573-48844573_C_T                 | 303R>H  | Substitution | Nonsynonymous |
| FPC0625 | <i>GRK1</i>     | chr13_114321792-114321792_C_T              | 31R>W   | Substitution | Nonsynonymous |
| Pa231   | <i>GRK7</i>     | chr3_141497160-141497160_G_A               | 12A>T   | Substitution | Nonsynonymous |
| FPC0652 | <i>GRM5</i>     | chr11_88300941-88300941_G_A                | 637A>V  | Substitution | Nonsynonymous |
| FPC0745 | <i>GSDMB</i>    | chr17_38062230-38062230_C_A                | 286E>D  | Substitution | Nonsynonymous |
| FPC0652 | <i>GTF3C1</i>   | chr16_27481592-27481592_C_T                | 1551E>K | Substitution | Nonsynonymous |
| FPC0652 | <i>GYS1</i>     | chr19_49472739-49472739_G_A                | 674R>C  | Substitution | Nonsynonymous |
| Pa227   | <i>GYS2</i>     | chr12_21733394-21733394_T_C                | 62N>S   | Substitution | Nonsynonymous |
| FPC0744 | <i>H2AFY2</i>   | chr10_71851697-71851697_G_A                | 155R>Q  | Substitution | Nonsynonymous |
| FPC0625 | <i>HACL1</i>    | chr3_15613280-15613280_A                   | NA      | Insertion    | Splicing      |
| FPC0649 | <i>HAPLN1</i>   | chr5_82937543-82937543_A_C                 | 279C>W  | Substitution | Nonsynonymous |
| FPC0652 | <i>HAT1</i>     | chr2_172822955-172822955_G_T               | 213A>S  | Substitution | Nonsynonymous |
| FPC0756 | <i>HBB</i>      | chr11_5248160-5248160_C_G                  | 31R>T   | Substitution | Nonsynonymous |
| Pa229   | <i>HBPI</i>     | chr7_106822983-106822983_C_G               | 112T>R  | Substitution | Nonsynonymous |
| FPC0737 | <i>HCN4</i>     | chr15_73615456-73615456_G_A                | 993T>M  | Substitution | Nonsynonymous |
| Pa231   | <i>HCN4</i>     | chr15_73660208-73660208_C_T                | 135G>D  | Substitution | Nonsynonymous |
| FPC0748 | <i>HDAC7</i>    | chr12_48190075-48190075_G_A                | 237S>F  | Substitution | Nonsynonymous |
| Pa229   | <i>HECTD1</i>   | chr14_31598240-31598240_GCACTGGAAGATGACCCT | NA      | Insertion    | In-frame      |
| Pa102   | <i>HEPACAM</i>  | chr11_124792636-124792636_C_A              | 294E>D  | Substitution | Nonsynonymous |
| Pa102   | <i>HEPN1</i>    | chr11_124789852-124789852_G_A              | 69R>Q   | Substitution | Nonsynonymous |
| Pa227   | <i>HERC1</i>    | chr15_63948096-63948096_C_T                | 3310R>Q | Substitution | Nonsynonymous |
| FPC0747 | <i>HERC2</i>    | chr15_28357016-28357016_C_T                | 4800A>T | Substitution | Nonsynonymous |
| FPC0751 | <i>HFM1</i>     | chr1_91850795-91850795_A                   | NA      | Deletion     | Splicing      |
| FPC0759 | <i>HGS</i>      | chr17_79658574-79658574_G_T                | 212C>F  | Substitution | Nonsynonymous |
| FPC0438 | <i>HIAT1</i>    | chr1_100547707-100547707_A_T               | 472H>L  | Substitution | Nonsynonymous |
| FPC0728 | <i>HIGD2B</i>   | chr15_72968711-72968711_G_A                | 2A>V    | Substitution | Nonsynonymous |
| Pa227   | <i>HIP1R</i>    | chr12_123340451-123340451_G_T              | NA      | Substitution | Splicing      |
| FPC0494 | <i>HIRA</i>     | chr22_19394779-19394779_C_T                | 77R>Q   | Substitution | Nonsynonymous |
| Pa227   | <i>HIST1H4B</i> | chr6_26027365-26027365_G_A                 | 39A>V   | Substitution | Nonsynonymous |
| FPC0745 | <i>HIVEP3</i>   | chr1_42046318-42046318_C_T                 | 1384S>N | Substitution | Nonsynonymous |
| FPC0747 | <i>HK2</i>      | chr2_75107496-75107496_C_T                 | 457T>I  | Substitution | Nonsynonymous |
| FPC0627 | <i>HMCN1</i>    | chr1_186043907-186043907_C_T               | 2725A>V | Substitution | Nonsynonymous |
| FPC0649 | <i>HMCN2</i>    | chr9_133266657-133266657_G_A               | 149R>Q  | Substitution | Nonsynonymous |
| Pa230   | <i>HNRNPM</i>   | chr19_8520336-8520336_T_A                  | 54I>K   | Substitution | Nonsynonymous |
| Pa227   | <i>HRNR</i>     | chr1_152185859-152185859_C_T               | 2749R>H | Substitution | Nonsynonymous |
| FPC0745 | <i>HS3ST1</i>   | chr4_11401236-11401236_G_A                 | 132R>X  | Substitution | Nonsense      |
| FPC0751 | <i>HS3ST1</i>   | chr4_11401473-11401473_G_A                 | 53Q>X   | Substitution | Nonsense      |
| FPC0747 | <i>HSCB</i>     | chr22_29139872-29139872_A_G                | 80N>S   | Substitution | Nonsynonymous |
| FPC0759 | <i>HSD17B2</i>  | chr16_82131763-82131763_G_A                | 296G>S  | Substitution | Nonsynonymous |
| FPC0494 | <i>HSD17B3</i>  | chr9_98997831-98997831_G_C                 | 282P>A  | Substitution | Nonsynonymous |
| FPC0747 | <i>HSF4</i>     | chr16_67198727-67198727_C_G                | 5P>A    | Substitution | Nonsynonymous |
| FPC0616 | <i>HSH2D</i>    | chr19_16268144-16268144_G_A                | 200R>H  | Substitution | Nonsynonymous |
| FPC0747 | <i>HSPAIL</i>   | chr6_31778008-31778008_G_A                 | 581S>L  | Substitution | Nonsynonymous |
| Pa227   | <i>HSPA6</i>    | chr1_161496156-161496156_C_T               | 570R>C  | Substitution | Nonsynonymous |
| Pa228   | <i>HSPA9</i>    | chr5_137902814-137902814_A_G               | 252I>T  | Substitution | Nonsynonymous |
| Pa229   | <i>HSPG2</i>    | chr1_22161214-22161214_C_T                 | 3560A>T | Substitution | Nonsynonymous |
| FPC0756 | <i>HTR7</i>     | chr10_92509035-92509035_C_T                | 286V>I  | Substitution | Nonsynonymous |
| FPC0746 | <i>HTR7P1</i>   | chr12_13153707-13153707_C_T                | 188S>F  | Substitution | Nonsynonymous |
| FPC0652 | <i>HYDIN</i>    | chr16_71096139-71096139_G_A                | 770T>I  | Substitution | Nonsynonymous |
| FPC0344 | <i>HYOU1</i>    | chr11_118919009-118919009_C_A              | 776S>I  | Substitution | Nonsynonymous |
| FPC0494 | <i>LAH1</i>     | chr2_9621469-9621469_G_C                   | 113S>T  | Substitution | Nonsynonymous |
| Pa228   | <i>IARS</i>     | chr9_95003206-95003206_C_T                 | 1072G>E | Substitution | Nonsynonymous |
| Pa228   | <i>IGDCC3</i>   | chr15_65622667-65622667_G_A                | 608R>C  | Substitution | Nonsynonymous |
| FPC0756 | <i>IGHA1</i>    | chr14_106173605-106173605_G_A              | 321R>C  | Substitution | Nonsynonymous |
| FPC0751 | <i>IGLV3-27</i> | chr22_23011181-23011181_G_A                | 82G>S   | Substitution | Nonsynonymous |
| FPC0494 | <i>IGSF1</i>    | chrX_130419756-130419756_C_A               | 122E>X  | Substitution | Nonsense      |
| FPC0616 | <i>IGSF10</i>   | chr3_151171534-151171534_C_T               | 118R>Q  | Substitution | Nonsynonymous |
| Pa227   | <i>IGSF9B</i>   | chr11_133791134-133791134_C_A              | 829S>I  | Substitution | Nonsynonymous |
| FPC0625 | <i>IL13RA2</i>  | chrX_114242638-114242638_G_C               | 285T>S  | Substitution | Nonsynonymous |

|         |                  |                               |         |              |               |
|---------|------------------|-------------------------------|---------|--------------|---------------|
| FPC0652 | <i>IL17B</i>     | chr5_148756438-148756438_G_A  | 58R>C   | Substitution | Nonsynonymous |
| FPC0745 | <i>ILDR1</i>     | chr3_121724153-121724153_C_T  | 106R>Q  | Substitution | Nonsynonymous |
| Pa228   | <i>ILF3</i>      | chr19_10787905-10787905_A_G   | 160T>A  | Substitution | Nonsynonymous |
| FPC0616 | <i>INO80</i>     | chr15_41388477-41388477_C_T   | 11G>E   | Substitution | Nonsynonymous |
| FPC0748 | <i>INTS12</i>    | chr4_106614622-106614622_C_T  | 111G>R  | Substitution | Nonsynonymous |
| FPC0745 | <i>IQCE</i>      | chr7_2608628-2608628_C_T      | 42S>L   | Substitution | Nonsynonymous |
| FPC0759 | <i>IQCF6</i>     | chr3_51812802-51812802_C_T    | 54R>Q   | Substitution | Nonsynonymous |
| FPC0525 | <i>IQCH</i>      | chr15_67652196-67652196_A_T   | 242R>S  | Substitution | Nonsynonymous |
| FPC0759 | <i>IRAK1</i>     | chrX_153279633-153279633_C_T  | 467A>T  | Substitution | Nonsynonymous |
| Pa230   | <i>IREB2</i>     | chr15_78777218-78777218_T_C   | 510I>T  | Substitution | Nonsynonymous |
| FPC0759 | <i>IRS1</i>      | chr2_227661396-227661398_TGC_ | NA      | Deletion     | In-frame      |
| FPC0747 | <i>IRX6</i>      | chr16_55360423-55360423_C_A   | 74P>H   | Substitution | Nonsynonymous |
| FPC0649 | <i>ISLR</i>      | chr15_74468241-74468241_G_A   | 348G>S  | Substitution | Nonsynonymous |
| Pa228   | <i>ISX</i>       | chr22_35481613-35481613_C_T   | 222T>I  | Substitution | Nonsynonymous |
| Pa228   | <i>ITGA7</i>     | chr12_56092548-56092548_C_T   | 315R>H  | Substitution | Nonsynonymous |
| FPC0625 | <i>ITGAX</i>     | chr16_31391868-31391868_G_A   | 1067V>M | Substitution | Nonsynonymous |
| FPC0347 | <i>ITIH5</i>     | chr10_7622013-7622013_C_G     | 375G>R  | Substitution | Nonsynonymous |
| Pa227   | <i>ITPR3</i>     | chr6_33656459-33656459_C_T    | 2199R>C | Substitution | Nonsynonymous |
| FPC0649 | <i>ITSN1</i>     | chr21_35254688-35254688_C_A   | 1495P>T | Substitution | Nonsynonymous |
| FPC0616 | <i>IVL</i>       | chr1_152883569-152883569_C_A  | 432H>Q  | Substitution | Nonsynonymous |
| FPC0627 | <i>JAM2</i>      | chr21_27084697-27084697_G_T   | NA      | Substitution | Splicing      |
| FPC0726 | <i>JPH4</i>      | chr14_24040238-24040238_C_T   | 568A>T  | Substitution | Nonsynonymous |
| Pa230   | <i>JUNB</i>      | chr19_12902725-12902725_A_G   | 47Y>C   | Substitution | Nonsynonymous |
| FPC0744 | <i>KCNA5</i>     | chr12_5154314-5154314_G_T     | 334W>L  | Substitution | Nonsynonymous |
| FPC0625 | <i>KCNA7</i>     | chr19_49575432-49575432_C_G   | 137E>D  | Substitution | Nonsynonymous |
| FPC0745 | <i>KCNE5</i>     | chrX_108868081-108868081_C_T  | 57D>N   | Substitution | Nonsynonymous |
| FPC0759 | <i>KCNG1</i>     | chr20_49621004-49621004_G_A   | 372R>C  | Substitution | Nonsynonymous |
| FPC0745 | <i>KCNG2</i>     | chr18_77623896-77623896_G_A   | 77A>T   | Substitution | Nonsynonymous |
| FPC0476 | <i>KCNG3</i>     | chr2_42720145-42720145_G_T    | 166S>X  | Substitution | Nonsense      |
| FPC0070 | <i>KCNHI</i>     | chr1_210857484-210857485_GA_  | NA      | Deletion     | Splicing      |
| FPC0347 | <i>KCNK15</i>    | chr20_43379388-43379388_G_A   | 301R>H  | Substitution | Nonsynonymous |
| Pa222   | <i>KCNK16</i>    | chr6_39284074-39284074_C_A    | NA      | Substitution | Splicing      |
| FPC0747 | <i>KCNK18</i>    | chr10_118969347-118969347_C_A | 231S>Y  | Substitution | Nonsynonymous |
| FPC0748 | <i>KCNMB3</i>    | chr3_178968609-178968609_A_T  | 61L>Q   | Substitution | Nonsynonymous |
| FPC0344 | <i>KCNN2</i>     | chr5_113740231-113740231_C_T  | 227H>Y  | Substitution | Nonsynonymous |
| Pa228   | <i>KCNQ2</i>     | chr20_62065228-62065228_A_G   | 351L>P  | Substitution | Nonsynonymous |
| Pa228   | <i>KCNT2</i>     | chr1_196311360-196311360_T_A  | NA      | Substitution | Splicing      |
| Pa228   | <i>KCNT2</i>     | chr1_196311361-196311361_G_C  | NA      | Substitution | Splicing      |
| Pa229   | <i>KCNT2</i>     | chr1_196227503-196227503_C_T  | 1011R>Q | Substitution | Nonsynonymous |
| FPC0344 | <i>KCNV2</i>     | chr9_2718160-2718160_G_A      | 141D>N  | Substitution | Nonsynonymous |
| Pa229   | <i>KCTD6</i>     | chr3_58486706-58486706_C_G    | 21H>D   | Substitution | Nonsynonymous |
| FPC0070 | <i>KDM3A</i>     | chr2_86678329-86678329_C_G    | 149P>R  | Substitution | Nonsynonymous |
| Pa102   | <i>KDM4C</i>     | chr9_7174667-7174667_G_A      | 1037D>N | Substitution | Nonsynonymous |
| Pa227   | <i>KIAA0556</i>  | chr16_27752211-27752211_A_T   | 865S>C  | Substitution | Nonsynonymous |
| FPC0347 | <i>ICE1</i>      | chr5_5461863-5461863_A_T      | 806R>X  | Substitution | Nonsense      |
| FPC0649 | <i>KIAA1109</i>  | chr4_123187938-123187938_G_T  | 2440V>F | Substitution | Nonsynonymous |
| FPC0728 | <i>KIAA1109</i>  | chr4_123128268-123128268_T_C  | 501L>S  | Substitution | Nonsynonymous |
| FPC0737 | <i>KIAA1211L</i> | chr2_99413812-99413812_C_A    | NA      | Substitution | Splicing      |
| FPC0649 | <i>ARFGEF3</i>   | chr6_138656264-138656264_G_A  | 2094R>H | Substitution | Nonsynonymous |
| FPC0744 | <i>KIAA1407</i>  | chr3_113737613-113737613_C_A  | 359V>F  | Substitution | Nonsynonymous |
| FPC0652 | <i>KIAA1462</i>  | chr10_30318342-30318342_T_G   | 245E>D  | Substitution | Nonsynonymous |
| FPC0625 | <i>KIAA1524</i>  | chr3_108276265-108276265_A    | NA      | Insertion    | Splicing      |
| FPC0745 | <i>KIAA1671</i>  | chr22_25434857-25434857_G_A   | 587G>D  | Substitution | Nonsynonymous |
| FPC0747 | <i>KIAA1755</i>  | chr20_36874488-36874488_G_A   | 15A>V   | Substitution | Nonsynonymous |
| FPC0728 | <i>CCAR2</i>     | chr8_22464772-22464772_A_G    | 141I>V  | Substitution | Nonsynonymous |
| FPC0616 | <i>KIAA2022</i>  | chrX_73961508-73961508_C_A    | 962D>Y  | Substitution | Nonsynonymous |
| FPC0744 | <i>KIAA2022</i>  | chrX_73965471-73965471_T_G    | 5Q>H    | Substitution | Nonsynonymous |
| FPC0476 | <i>KIF13A</i>    | chr6_17772273-17772273_G_C    | 1448P>A | Substitution | Nonsynonymous |
| Pa229   | <i>KIF1B</i>     | chr1_10381896-10381896_G_C    | 734S>T  | Substitution | Nonsynonymous |
| FPC0745 | <i>KIF26A</i>    | chr14_104641592-104641592_C_T | 823R>C  | Substitution | Nonsynonymous |
| FPC0748 | <i>KL</i>        | chr13_33635773-33635773_C_T   | 853R>C  | Substitution | Nonsynonymous |
| FPC0746 | <i>KLF17</i>     | chr1_44596381-44596381_A_G    | 375N>D  | Substitution | Nonsynonymous |
| FPC0751 | <i>KLHDC7A</i>   | chr1_18808142-18808142_T_G    | 223W>G  | Substitution | Nonsynonymous |
| FPC0746 | <i>KLHL2</i>     | chr4_166159933-166159933_A_G  | 88E>G   | Substitution | Nonsynonymous |
| FPC0625 | <i>KLRF1</i>     | chr12_9994450-9994450_G_A     | 126C>Y  | Substitution | Nonsynonymous |
| FPC0625 | <i>KLRF1</i>     | chr12_9994453-9994453_A_G     | 127Y>C  | Substitution | Nonsynonymous |
| FPC0625 | <i>KLRF1</i>     | chr12_9994454-9994454_T_G     | 127Y>X  | Substitution | Nonsense      |
| FPC0616 | <i>KNDC1</i>     | chr10_135015094-135015094_C_T | 1027R>W | Substitution | Nonsynonymous |

|         |                  |                               |         |              |               |
|---------|------------------|-------------------------------|---------|--------------|---------------|
| FPC0081 | <i>KNTC1</i>     | chr12_123082423-123082423_A_T | 1501M>L | Substitution | Nonsynonymous |
| FPC0070 | <i>KRAS</i>      | chr12_25398284-25398284_C_T   | 12G>D   | Substitution | Nonsynonymous |
| FPC0081 | <i>KRAS</i>      | chr12_25380276-25380276_T_A   | 61Q>L   | Substitution | Nonsynonymous |
| FPC0135 | <i>KRAS</i>      | chr12_25380276-25380276_T_C   | 61Q>R   | Substitution | Nonsynonymous |
| FPC0344 | <i>KRAS</i>      | chr12_25398284-25398284_C_A   | 12G>V   | Substitution | Nonsynonymous |
| FPC0347 | <i>KRAS</i>      | chr12_25398284-25398284_C_A   | 12G>V   | Substitution | Nonsynonymous |
| FPC0438 | <i>KRAS</i>      | chr12_25380275-25380275_T_G   | 61Q>H   | Substitution | Nonsynonymous |
| FPC0476 | <i>KRAS</i>      | chr12_25380276-25380276_T_A   | 61Q>L   | Substitution | Nonsynonymous |
| FPC0494 | <i>KRAS</i>      | chr12_25398285-25398285_C_G   | 12G>R   | Substitution | Nonsynonymous |
| FPC0525 | <i>KRAS</i>      | chr12_25398284-25398284_C_A   | 12G>V   | Substitution | Nonsynonymous |
| FPC0616 | <i>KRAS</i>      | chr12_25398284-25398284_C_T   | 12G>D   | Substitution | Nonsynonymous |
| FPC0625 | <i>KRAS</i>      | chr12_25398284-25398284_C_T   | 12G>D   | Substitution | Nonsynonymous |
| FPC0627 | <i>KRAS</i>      | chr12_25398284-25398284_C_T   | 12G>D   | Substitution | Nonsynonymous |
| FPC0645 | <i>KRAS</i>      | chr12_25398285-25398285_C_G   | 12G>R   | Substitution | Nonsynonymous |
| FPC0652 | <i>KRAS</i>      | chr12_25398284-25398284_C_T   | 12G>D   | Substitution | Nonsynonymous |
| FPC0725 | <i>KRAS</i>      | chr12_25398284-25398284_C_T   | 12G>D   | Substitution | Nonsynonymous |
| FPC0726 | <i>KRAS</i>      | chr12_25398284-25398284_C_T   | 12G>D   | Substitution | Nonsynonymous |
| FPC0728 | <i>KRAS</i>      | chr12_25398284-25398284_C_T   | 12G>D   | Substitution | Nonsynonymous |
| FPC0737 | <i>KRAS</i>      | chr12_25398284-25398284_C_T   | 12G>D   | Substitution | Nonsynonymous |
| FPC0744 | <i>KRAS</i>      | chr12_25398284-25398284_C_A   | 12G>V   | Substitution | Nonsynonymous |
| FPC0745 | <i>KRAS</i>      | chr12_25398284-25398284_C_T   | 12G>D   | Substitution | Nonsynonymous |
| FPC0746 | <i>KRAS</i>      | chr12_25398285-25398285_C_G   | 12G>R   | Substitution | Nonsynonymous |
| FPC0747 | <i>KRAS</i>      | chr12_25380275-25380275_T_G   | 61Q>H   | Substitution | Nonsynonymous |
| FPC0748 | <i>KRAS</i>      | chr12_25398284-25398284_C_A   | 12G>V   | Substitution | Nonsynonymous |
| FPC0751 | <i>KRAS</i>      | chr12_25398284-25398284_C_T   | 12G>D   | Substitution | Nonsynonymous |
| FPC0756 | <i>KRAS</i>      | chr12_25398284-25398284_C_A   | 12G>V   | Substitution | Nonsynonymous |
| Pa101   | <i>KRAS</i>      | chr12_25398284-25398284_C_A   | 12G>V   | Substitution | Nonsynonymous |
| Pa102   | <i>KRAS</i>      | chr12_25398284-25398284_C_T   | 12G>D   | Substitution | Nonsynonymous |
| Pa222   | <i>KRAS</i>      | chr12_25398284-25398284_C_T   | 12G>D   | Substitution | Nonsynonymous |
| Pa227   | <i>KRAS</i>      | chr12_25398284-25398284_C_T   | 12G>D   | Substitution | Nonsynonymous |
| Pa228   | <i>KRAS</i>      | chr12_25398284-25398284_C_T   | 12G>D   | Substitution | Nonsynonymous |
| Pa229   | <i>KRAS</i>      | chr12_25398284-25398284_C_A   | 12G>V   | Substitution | Nonsynonymous |
| Pa230   | <i>KRAS</i>      | chr12_25398284-25398284_C_A   | 12G>V   | Substitution | Nonsynonymous |
| Pa231   | <i>KRAS</i>      | chr12_25380275-25380275_T_G   | 61Q>H   | Substitution | Nonsynonymous |
| FPC0652 | <i>KRT2</i>      | chr12_53039355-53039355_T_G   | NA      | Substitution | Splicing      |
| FPC0744 | <i>KRT24</i>     | chr17_38859762-38859762_C_T   | 62G>S   | Substitution | Nonsynonymous |
| Pa102   | <i>KRT84</i>     | chr12_52772162-52772162_C_T   | 487V>I  | Substitution | Nonsynonymous |
| FPC0494 | <i>KRTAP24-1</i> | chr21_31655018-31655018_G_T   | 78P>H   | Substitution | Nonsynonymous |
| FPC0347 | <i>KRTAP3-2</i>  | chr17_39155882-39155882_G_A   | 75P>L   | Substitution | Nonsynonymous |
| FPC0347 | <i>KY</i>        | chr3_134369700-134369700_C_T  | 35A>T   | Substitution | Nonsynonymous |
| FPC0747 | <i>LAMA1</i>     | chr18_6986267-6986267_C_A     | 1750A>S | Substitution | Nonsynonymous |
| FPC0494 | <i>LAMA3</i>     | chr18_21529777-21529777_G_C   | 3134D>H | Substitution | Nonsynonymous |
| Pa222   | <i>LAMA5</i>     | chr20_60897815-60897815_C_T   | NA      | Substitution | Splicing      |
| FPC0652 | <i>LAMC1</i>     | chr1_183097865-183097865_G_A  | 1087R>H | Substitution | Nonsynonymous |
| FPC0625 | <i>LARP7</i>     | chr4_113578483-113578483_A    | NA      | Insertion    | Frameshift    |
| FPC0745 | <i>LASIL</i>     | chrX_64749109-64749109_C_G    | 277E>Q  | Substitution | Nonsynonymous |
| FPC0476 | <i>LEMD3</i>     | chr12_65564791-65564791_A_G   | 472Y>C  | Substitution | Nonsynonymous |
| Pa227   | <i>P3H3</i>      | chr12_6938023-6938023_C_G     | 140R>G  | Substitution | Nonsynonymous |
| FPC0747 | <i>LHX5</i>      | chr12_113907121-113907121_G_A | 68A>V   | Substitution | Nonsynonymous |
| Pa222   | <i>LIMK1</i>     | chr7_73507608-73507608_G_A    | 10R>H   | Substitution | Nonsynonymous |
| FPC0625 | <i>LINTA</i>     | chr12_81239722-81239722_A     | NA      | Insertion    | Splicing      |
| FPC0135 | <i>LINC00521</i> | chr14_94467512-94467512_C_T   | NA      | Substitution | NA            |
| FPC0727 | <i>LIPE</i>      | chr19_42914802-42914802_G_A   | 359A>V  | Substitution | Nonsynonymous |
| FPC0744 | <i>LIPF</i>      | chr10_90427400-90427400_A_C   | 60E>D   | Substitution | Nonsynonymous |
| FPC0746 | <i>LIPH</i>      | chr3_185232267-185232267_AC   | NA      | Insertion    | Frameshift    |
| Pa222   | <i>LIX1</i>      | chr5_96430624-96430624_C_T    | 226R>Q  | Substitution | Nonsynonymous |
| Pa227   | <i>LMLN</i>      | chr3_197707203-197707203_C_T  | 186R>W  | Substitution | Nonsynonymous |
| FPC0737 | <i>LMTK3</i>     | chr19_49001957-49001957_G_A   | 819P>L  | Substitution | Nonsynonymous |
| Pa101   | <i>LPA</i>       | chr6_161006199-161006199_G_A  | 1390R>X | Substitution | Nonsense      |
| Pa222   | <i>ADGRL1</i>    | chr19_14263136-14263136_C_T   | 1217V>I | Substitution | Nonsynonymous |
| FPC0745 | <i>LPIN3</i>     | chr20_39987466-39987466_G_A   | 839R>Q  | Substitution | Nonsynonymous |
| FPC0476 | <i>LRP1B</i>     | chr2_141625347-141625347_C_T  | 1464R>Q | Substitution | Nonsynonymous |
| FPC0625 | <i>LRP1B</i>     | chr2_141459795-141459795_C_T  | 2073G>R | Substitution | Nonsynonymous |
| FPC0748 | <i>LRP1B</i>     | chr2_140995761-140995761_C_A  | 4507G>V | Substitution | Nonsynonymous |
| FPC0070 | <i>LRP2</i>      | chr2_170063276-170063276_G_T  | 2318D>E | Substitution | Nonsynonymous |
| FPC0476 | <i>LRP2</i>      | chr2_170009390-170009390_C_T  | 4127R>H | Substitution | Nonsynonymous |
| Pa228   | <i>LRP6</i>      | chr12_12397358-12397358_G_T   | 96S>Y   | Substitution | Nonsynonymous |
| FPC0645 | <i>LRRC24</i>    | chr8_145747933-145747933_C_T  | 490D>N  | Substitution | Nonsynonymous |

|         |                 |                               |         |              |               |
|---------|-----------------|-------------------------------|---------|--------------|---------------|
| Pa231   | <i>NRROS</i>    | chr3_196386812-196386812_G_A  | 100A>T  | Substitution | Nonsynonymous |
| Pa222   | <i>LRRC55</i>   | chr11_56950145-56950145_C_T   | 260R>C  | Substitution | Nonsynonymous |
| FPC0344 | <i>LRRC71</i>   | chr1_156899472-156899472_T    | NA      | Insertion    | Frameshift    |
| Pa229   | <i>LRR1Q1</i>   | chr12_85554492-85554492_G_T   | 1608G>C | Substitution | Nonsynonymous |
| FPC0746 | <i>LRRK2</i>    | chr12_40677878-40677878_C_A   | 815P>T  | Substitution | Nonsynonymous |
| FPC0081 | <i>LRRTM1</i>   | chr2_80529836-80529836_G_T    | 370T>N  | Substitution | Nonsynonymous |
| Pa230   | <i>LRRTM3</i>   | chr10_68687327-68687327_C_A   | 218S>Y  | Substitution | Nonsynonymous |
| FPC0494 | <i>LSM12</i>    | chr17_42141262-42141262_G_C   | 55I>M   | Substitution | Nonsynonymous |
| FPC0652 | <i>LTBP1</i>    | chr2_33468758-33468758_T_C    | 636C>R  | Substitution | Nonsynonymous |
| FPC0525 | <i>LTBP3</i>    | chr11_65319824-65319824_G_A   | 414Q>X  | Substitution | Nonsense      |
| FPC0616 | <i>LTF</i>      | chr3_46501292-46501292_G_T    | 21R>S   | Substitution | Nonsynonymous |
| FPC0744 | <i>LYNX1</i>    | chr8_143857086-143857086_C_A  | 27A>S   | Substitution | Nonsynonymous |
| FPC0494 | <i>LYST</i>     | chr1_235894163-235894163_C_A  | 3010A>S | Substitution | Nonsynonymous |
| FPC0625 | <i>LYST</i>     | chr1_235938389-235938389_A    | NA      | Insertion    | Splicing      |
| FPC0756 | <i>MAGEB10</i>  | chrX_27840153-27840153_C_A    | 244P>T  | Substitution | Nonsynonymous |
| FPC0737 | <i>MAGEB17</i>  | chrX_16188795-16188795_G_T    | 97G>V   | Substitution | Nonsynonymous |
| FPC0728 | <i>MAGEB18</i>  | chrX_26158032-26158032_G_C    | 310E>D  | Substitution | Nonsynonymous |
| FPC0747 | <i>MAGI2</i>    | chr7_77789413-77789413_C_T    | 925R>H  | Substitution | Nonsynonymous |
| Pa227   | <i>MAGI2</i>    | chr7_77764361-77764361_G_C    | 1003T>S | Substitution | Nonsynonymous |
| FPC0625 | <i>MAML2</i>    | chr11_95826575-95826575_C_A   | 207R>L  | Substitution | Nonsynonymous |
| FPC0745 | <i>MAN2A1</i>   | chr5_109106176-109106176_G_A  | 377G>E  | Substitution | Nonsynonymous |
| Pa101   | <i>MAP1S</i>    | chr19_17837917-17837917_C_T   | 575P>L  | Substitution | Nonsynonymous |
| FPC0751 | <i>MAP2K1</i>   | chr15_66774194-66774194_G_A   | 224V>M  | Substitution | Nonsynonymous |
| Pa102   | <i>MAP2K1</i>   | chr15_66679764-66679764_G_C   | 27E>Q   | Substitution | Nonsynonymous |
| FPC0744 | <i>MAP2K4</i>   | chr17_12028625-12028625_C_A   | 276D>E  | Substitution | Nonsynonymous |
| FPC0494 | <i>MAPK15</i>   | chr8_144804016-144804016_G_A  | 475R>Q  | Substitution | Nonsynonymous |
| FPC0751 | <i>MAPK8</i>    | chr10_49609715-49609715_C_G   | 4S>R    | Substitution | Nonsynonymous |
| FPC0746 | <i>MATN4</i>    | chr20_43932934-43932934_C_T   | 193V>I  | Substitution | Nonsynonymous |
| Pa229   | <i>MBD5</i>     | chr2_149227865-149227865_A_C  | 785N>H  | Substitution | Nonsynonymous |
| FPC0652 | <i>MBLAC2</i>   | chr5_89769854-89769854_A_C    | 86F>V   | Substitution | Nonsynonymous |
| FPC0756 | <i>MCF2L2</i>   | chr3_183035949-183035949_A    | NA      | Deletion     | Frameshift    |
| FPC0745 | <i>MCTP1</i>    | chr5_94230502-94230502_G_A    | 564T>M  | Substitution | Nonsynonymous |
| FPC0344 | <i>MDN1</i>     | chr6_90513179-90513179_C_A    | 66R>L   | Substitution | Nonsynonymous |
| FPC0625 | <i>MED27</i>    | chr9_134735980-134735980_G_A  | 294P>L  | Substitution | Nonsynonymous |
| FPC0737 | <i>MEGF10</i>   | chr5_126732418-126732418_T_C  | 203C>R  | Substitution | Nonsynonymous |
| FPC0625 | <i>MGA</i>      | chr15_42021471-42021471_C     | NA      | Deletion     | Frameshift    |
| Pa222   | <i>MGAT4A</i>   | chr2_99256294-99256294_A      | NA      | Deletion     | Frameshift    |
| Pa231   | <i>MGAT5</i>    | chr2_135076257-135076257_G_A  | 174A>T  | Substitution | Nonsynonymous |
| Pa230   | <i>MICALL1</i>  | chr22_38321979-38321979_G_T   | 465G>V  | Substitution | Nonsynonymous |
| FPC0649 | <i>MIR223</i>   | chrX_65238767-65238767_C_T    | 19P>L   | Substitution | Nonsynonymous |
| Pa222   | <i>MIR525</i>   | chr19_54200844-54200844_G_A   | 20A>T   | Substitution | Nonsynonymous |
| Pa222   | <i>MIR936</i>   | chr10_105807923-105807923_T_C | 8R>G    | Substitution | Nonsynonymous |
| FPC0652 | <i>MIRLET7E</i> | chr19_52196093-52196093_A_G   | 19I>V   | Substitution | Nonsynonymous |
| FPC0746 | <i>KMT2D</i>    | chr12_49444741-49444742_AC    | NA      | Deletion     | Frameshift    |
| FPC0344 | <i>KMT2C</i>    | chr7_151879331-151879331_G_A  | 1872Q>X | Substitution | Nonsense      |
| FPC0627 | <i>KMT2C</i>    | chr7_151945330-151945330_G_T  | 730S>Y  | Substitution | Nonsynonymous |
| FPC0759 | <i>MMEL1</i>    | chr1_2541231-2541231_G_A      | 102P>L  | Substitution | Nonsynonymous |
| Pa228   | <i>MMEL1</i>    | chr1_2535385-2535385_C_T      | 318D>N  | Substitution | Nonsynonymous |
| FPC0737 | <i>MMP2</i>     | chr16_55530924-55530924_T_C   | 520I>T  | Substitution | Nonsynonymous |
| Pa228   | <i>MMP27</i>    | chr11_102562592-102562592_G_A | 483H>Y  | Substitution | Nonsynonymous |
| FPC0649 | <i>MOGAT1</i>   | chr2_223574553-223574553_G_A  | 318E>K  | Substitution | Nonsynonymous |
| FPC0649 | <i>MOV10L1</i>  | chr22_50596562-50596562_G_T   | 1048C>F | Substitution | Nonsynonymous |
| FPC0494 | <i>MPC2</i>     | chr1_167893779-167893779_A    | NA      | Deletion     | Splicing      |
| FPC0476 | <i>MPHOSPH9</i> | chr12_123706093-123706093_G_A | 81A>V   | Substitution | Nonsynonymous |
| FPC0625 | <i>MRE11A</i>   | chr11_94212931-94212931_A     | NA      | Insertion    | Splicing      |
| Pa228   | <i>MROH6</i>    | chr8_144653916-144653916_G_A  | 175R>X  | Substitution | Nonsense      |
| Pa101   | <i>MRPL30</i>   | chr2_99812044-99812044_C_T    | 121P>L  | Substitution | Nonsynonymous |
| FPC0494 | <i>MRPS31</i>   | chr13_41345268-41345268_A_G   | 2F>S    | Substitution | Nonsynonymous |
| FPC0344 | <i>MRPS5</i>    | chr2_95766281-95766281_A_T    | 290I>K  | Substitution | Nonsynonymous |
| FPC0525 | <i>MS4A14</i>   | chr11_60183408-60183408_C_A   | 323Q>K  | Substitution | Nonsynonymous |
| FPC0438 | <i>MTMR1</i>    | chrX_149931095-149931095_C_T  | 631R>C  | Substitution | Nonsynonymous |
| FPC0476 | <i>MTMR1</i>    | chrX_149905203-149905203_C_T  | 398A>V  | Substitution | Nonsynonymous |
| FPC0726 | <i>MTMR12</i>   | chr5_32229936-32229936_T_C    | 731E>G  | Substitution | Nonsynonymous |
| Pa230   | <i>MTSS1</i>    | chr8_125577963-125577963_G_A  | 255S>L  | Substitution | Nonsynonymous |
| Pa229   | <i>MUC19</i>    | chr12_40935424-40935424_T_G   | 151S>A  | Substitution | Nonsynonymous |
| FPC0746 | <i>MUC20</i>    | chr3_195452649-195452649_C_T  | 392P>L  | Substitution | Nonsynonymous |
| FPC0747 | <i>MVP</i>      | chr16_29859162-29859162_C_T   | 845A>V  | Substitution | Nonsynonymous |
| FPC0625 | <i>MYCBP2</i>   | chr13_77750766-77750766_A     | NA      | Deletion     | Splicing      |

|         |                |                               |         |              |               |
|---------|----------------|-------------------------------|---------|--------------|---------------|
| FPC0494 | <i>MYH11</i>   | chr16_15832467-15832467_T_G   | 1033T>P | Substitution | Nonsynonymous |
| FPC0347 | <i>MYH13</i>   | chr17_10227376-10227376_G_A   | 966T>M  | Substitution | Nonsynonymous |
| FPC0746 | <i>MYH8</i>    | chr17_10307718-10307718_G_A   | 873R>W  | Substitution | Nonsynonymous |
| FPC0070 | <i>MYL1</i>    | chr2_211179766-211179766_T_   | NA      | Deletion     | Frameshift    |
| Pa227   | <i>MYO18A</i>  | chr17_27425864-27425864_C_G   | 1254E>Q | Substitution | Nonsynonymous |
| Pa228   | <i>MYO1F</i>   | chr19_8620554-8620554_C_T     | 44D>N   | Substitution | Nonsynonymous |
| FPC0744 | <i>MYO3A</i>   | chr10_26241122-26241122_G_A   | 28G>D   | Substitution | Nonsynonymous |
| Pa231   | <i>MYO5C</i>   | chr15_52521349-52521349_C_A   | 1063R>L | Substitution | Nonsynonymous |
| FPC0747 | <i>MYO7B</i>   | chr2_128367539-128367539_C_T  | 1047T>M | Substitution | Nonsynonymous |
| Pa222   | <i>MYO7B</i>   | chr2_128327368-128327368_G_A  | 159E>K  | Substitution | Nonsynonymous |
| Pa228   | <i>MYO7B</i>   | chr2_128394117-128394117_C_T  | NA      | Substitution | Splicing      |
| Pa101   | <i>MYO9B</i>   | chr19_17212643-17212643_C_T   | 39T>I   | Substitution | Nonsynonymous |
| Pa101   | <i>MYRIP</i>   | chr3_40231481-40231481_G_A    | 398E>K  | Substitution | Nonsynonymous |
| Pa230   | <i>NAA15</i>   | chr4_140283064-140283064_G_T  | 576E>X  | Substitution | Nonsense      |
| FPC0744 | <i>NADK</i>    | chr1_1688032-1688032_A_       | NA      | Deletion     | Frameshift    |
| FPC0747 | <i>NAGA</i>    | chr22_42456411-42456411_C_A   | 370D>Y  | Substitution | Nonsynonymous |
| FPC0746 | <i>NALCN</i>   | chr13_101910868-101910868_C_T | 398V>M  | Substitution | Nonsynonymous |
| FPC0751 | <i>NAPSA</i>   | chr19_50864268-50864268_G_A   | 200R>W  | Substitution | Nonsynonymous |
| Pa229   | <i>ICE2</i>    | chr15_60745863-60745863_G_A   | 355T>I  | Substitution | Nonsynonymous |
| FPC0525 | <i>NAV2</i>    | chr11_20077350-20077350_A_G   | 1560N>D | Substitution | Nonsynonymous |
| FPC0344 | <i>NBEAL2</i>  | chr3_47047258-47047258_A_G    | 2241N>S | Substitution | Nonsynonymous |
| FPC0747 | <i>NCAM1</i>   | chr11_113142516-113142516_C_T | 247R>X  | Substitution | Nonsense      |
| Pa228   | <i>NCAM2</i>   | chr21_22906907-22906907_A_T   | 778R>X  | Substitution | Nonsense      |
| FPC0728 | <i>NCK1</i>    | chr3_136646868-136646868_G_A  | 9A>T    | Substitution | Nonsynonymous |
| Pa222   | <i>NCMAP</i>   | chr1_24921954-24921956_CTT_   | NA      | Deletion     | In-frame      |
| FPC0344 | <i>NDN</i>     | chr15_23932118-23932118_G_A   | 83P>S   | Substitution | Nonsynonymous |
| FPC0476 | <i>NDNF</i>    | chr4_121957450-121957451_CT_  | NA      | Deletion     | Frameshift    |
| Pa101   | <i>NDST1</i>   | chr5_149924915-149924915_A_G  | 671D>G  | Substitution | Nonsynonymous |
| FPC0627 | <i>NDUFAF3</i> | chr3_49059867-49059867_C_G    | 56Q>E   | Substitution | Nonsynonymous |
| FPC0748 | <i>NDUFB4</i>  | chr3_120315283-120315283_C_T  | 26S>F   | Substitution | Nonsynonymous |
| FPC0625 | <i>NEB</i>     | chr2_152402516-152402516_A_   | NA      | Insertion    | Splicing      |
| FPC0744 | <i>NEB</i>     | chr2_152402878-152402878_C_A  | 5115R>L | Substitution | Nonsynonymous |
| FPC0746 | <i>NEB</i>     | chr2_152467061-152467061_C_A  | 3753S>I | Substitution | Nonsynonymous |
| FPC0756 | <i>NEB</i>     | chr2_152502670-152502670_T_C  | 2504K>E | Substitution | Nonsynonymous |
| FPC0135 | <i>NEMF</i>    | chr14_50262552-50262552_C_T   | 859S>N  | Substitution | Nonsynonymous |
| FPC0652 | <i>NFKBIZ</i>  | chr3_101574703-101574703_C_   | NA      | Insertion    | Frameshift    |
| FPC0759 | <i>NFXL1</i>   | chr4_47916120-47916120_C_T    | 34G>E   | Substitution | Nonsynonymous |
| Pa229   | <i>NKX6-3</i>  | chr8_41507968-41507968_G_A    | 15P>L   | Substitution | Nonsynonymous |
| Pa228   | <i>NLRP12</i>  | chr19_54313706-54313706_C_T   | 403V>I  | Substitution | Nonsynonymous |
| Pa229   | <i>NLRP4</i>   | chr19_56369657-56369657_C_T   | 300R>W  | Substitution | Nonsynonymous |
| FPC0649 | <i>NLRP5</i>   | chr19_56569755-56569755_C_T   | 1150T>M | Substitution | Nonsynonymous |
| Pa227   | <i>NLRP5</i>   | chr19_56539520-56539520_G_A   | 641V>M  | Substitution | Nonsynonymous |
| Pa101   | <i>NNT</i>     | chr5_43656074-43656074_C_T    | 731T>M  | Substitution | Nonsynonymous |
| FPC0744 | <i>NOA1</i>    | chr4_57829624-57829624_T_C    | 697N>D  | Substitution | Nonsynonymous |
| Pa101   | <i>NOL11</i>   | chr17_65734394-65734394_A_C   | 562Q>H  | Substitution | Nonsynonymous |
| FPC0625 | <i>NOLA</i>    | chr18_31523145-31523145_A_    | NA      | Deletion     | Splicing      |
| FPC0347 | <i>NOX1</i>    | chrX_100117243-100117243_G_A  | 241R>C  | Substitution | Nonsynonymous |
| FPC0626 | <i>NPAP1</i>   | chr15_24921079-24921079_G_A   | 22R>H   | Substitution | Nonsynonymous |
| Pa222   | <i>NPFFR2</i>  | chr4_73013324-73013324_G_A    | 455C>Y  | Substitution | Nonsynonymous |
| FPC0745 | <i>NPHS1</i>   | chr19_36335290-36335290_C_T   | 668V>M  | Substitution | Nonsynonymous |
| Pa230   | <i>NPHS1</i>   | chr19_36322017-36322017_C_T   | 1140R>H | Substitution | Nonsynonymous |
| FPC0627 | <i>NPL</i>     | chr1_182787714-182787714_A_T  | 166I>F  | Substitution | Nonsynonymous |
| FPC0476 | <i>NPLOC4</i>  | chr17_79571645-79571645_G_A   | 255R>W  | Substitution | Nonsynonymous |
| FPC0627 | <i>NR12</i>    | chr3_119533869-119533869_G_A  | 319A>T  | Substitution | Nonsynonymous |
| FPC0751 | <i>NR5A2</i>   | chr1_200143282-200143282_G_A  | 524G>R  | Substitution | Nonsynonymous |
| FPC0625 | <i>NRAP</i>    | chr10_115405704-115405704_AA  | NA      | Insertion    | Splicing      |
| Pa227   | <i>NRAP</i>    | chr10_115372131-115372131_C_A | 1120M>I | Substitution | Nonsynonymous |
| FPC0625 | <i>NRXN1</i>   | chr2_50850700-50850700_A_T    | 329L>M  | Substitution | Nonsynonymous |
| FPC0756 | <i>NRXN3</i>   | chr14_79111646-79111646_C_T   | 75A>V   | Substitution | Nonsynonymous |
| Pa101   | <i>NRXN3</i>   | chr14_79175585-79175585_G_A   | 43R>H   | Substitution | Nonsynonymous |
| Pa222   | <i>NT5C1B</i>  | chr2_18765976-18765976_G_C    | 236S>W  | Substitution | Nonsynonymous |
| FPC0494 | <i>NT5E</i>    | chr6_86197211-86197211_A_C    | NA      | Substitution | Splicing      |
| FPC0476 | <i>NTNG1</i>   | chr1_107937828-107937828_A_G  | 314T>A  | Substitution | Nonsynonymous |
| Pa222   | <i>NUDT17</i>  | chr1_145586623-145586623_T_C  | 318D>G  | Substitution | Nonsynonymous |
| FPC0438 | <i>NXNL1</i>   | chr19_17571644-17571644_C_T   | 12R>H   | Substitution | Nonsynonymous |
| FPC0476 | <i>OBSCN</i>   | chr1_228469871-228469871_G_A  | 2812R>Q | Substitution | Nonsynonymous |
| FPC0652 | <i>OBSCN</i>   | chr1_228540673-228540673_G_A  | 6191A>T | Substitution | Nonsynonymous |
| FPC0344 | <i>OBSL1</i>   | chr2_220432586-220432586_C_T  | 463R>H  | Substitution | Nonsynonymous |

|         |                |                               |         |              |               |
|---------|----------------|-------------------------------|---------|--------------|---------------|
| Pa227   | <i>OGDHL</i>   | chr10_50953992-50953992_C_T   | 443R>H  | Substitution | Nonsynonymous |
| FPC0616 | <i>OPRK1</i>   | chr8_54141985-54141985_G_A    | 339R>W  | Substitution | Nonsynonymous |
| FPC0494 | <i>OR10A2</i>  | chr11_6890999-6890999_C_A     | 5S>Y    | Substitution | Nonsynonymous |
| FPC0476 | <i>OR10AD1</i> | chr12_48596268-48596268_C_T   | 270D>N  | Substitution | Nonsynonymous |
| Pa222   | <i>OR10C1</i>  | chr6_29408456-29408456_G_A    | 222V>I  | Substitution | Nonsynonymous |
| FPC0494 | <i>OR10S1</i>  | chr11_123848191-123848191_A_T | 70L>I   | Substitution | Nonsynonymous |
| FPC0494 | <i>OR10S1</i>  | chr11_123848197-123848197_G_T | 68L>I   | Substitution | Nonsynonymous |
| Pa229   | <i>OR14K1</i>  | chr1_247902083-247902083_C_A  | 56A>E   | Substitution | Nonsynonymous |
| Pa222   | <i>OR2C1</i>   | chr16_3406088-3406088_C_T     | 50R>C   | Substitution | Nonsynonymous |
| FPC0347 | <i>OR2T2</i>   | chr1_248616641-248616641_G_C  | 181E>D  | Substitution | Nonsynonymous |
| Pa228   | <i>OR2T8</i>   | chr1_248059713-248059713_G_A  | 275M>I  | Substitution | Nonsynonymous |
| FPC0135 | <i>OR2W1</i>   | chr6_29012115-29012115_C_T    | 280V>I  | Substitution | Nonsynonymous |
| Pa229   | <i>OR4M2</i>   | chr15_22369038-22369038_C_A   | 155H>N  | Substitution | Nonsynonymous |
| FPC0135 | <i>OR4N2</i>   | chr14_20296473-20296473_T_C   | 289L>P  | Substitution | Nonsynonymous |
| FPC0728 | <i>OR51Q1</i>  | chr11_5443608-5443608_C_T     | 60R>C   | Substitution | Nonsynonymous |
| FPC0627 | <i>OR52A5</i>  | chr11_5153409-5153409_G_A     | 155A>V  | Substitution | Nonsynonymous |
| FPC0745 | <i>OR5A1</i>   | chr11_59211266-59211266_G_A   | 209V>I  | Substitution | Nonsynonymous |
| Pa229   | <i>OR5D17P</i> | chr11_55522951-55522951_T_A   | 158C>S  | Substitution | Nonsynonymous |
| Pa102   | <i>OR8B2</i>   | chr11_12425251-12425251_G_T   | 230S>Y  | Substitution | Nonsynonymous |
| FPC0745 | <i>OSBP</i>    | chr11_59378034-59378034_G_A   | 131R>C  | Substitution | Nonsynonymous |
| Pa222   | <i>OSBPL6</i>  | chr2_179201053-179201053_A_G  | 207Q>R  | Substitution | Nonsynonymous |
| Pa230   | <i>OXCT2</i>   | chr1_40235796-40235796_C_T    | 378A>T  | Substitution | Nonsynonymous |
| FPC0344 | <i>P2RX2</i>   | chr12_133198064-133198064_G_A | 334G>R  | Substitution | Nonsynonymous |
| FPC0652 | <i>P2RY4</i>   | chrX_69478619-69478619_C_T    | 286V>M  | Substitution | Nonsynonymous |
| FPC0652 | <i>P2RY6</i>   | chr11_73008273-73008273_C_T   | 237A>V  | Substitution | Nonsynonymous |
| Pa222   | <i>PABPC1</i>  | chr8_101719138-101719138_C_T  | 475R>Q  | Substitution | Nonsynonymous |
| FPC0745 | <i>PAIP1</i>   | chr5_43535071-43535071_C_T    | 361D>N  | Substitution | Nonsynonymous |
| FPC0746 | <i>PAK4</i>    | chr19_39667336-39667336_G_A   | 489R>H  | Substitution | Nonsynonymous |
| FPC0347 | <i>PAMR1</i>   | chr11_35492155-35492155_T_A   | 236I>F  | Substitution | Nonsynonymous |
| FPC0726 | <i>PANX3</i>   | chr11_124489550-124489550_C_T | 300R>X  | Substitution | Nonsense      |
| FPC0747 | <i>PAPD4</i>   | chr5_78964853-78964853_T_C    | NA      | Substitution | Splicing      |
| FPC0751 | <i>PAPPA</i>   | chr9_119129926-119129926_T_A  | 1500S>T | Substitution | Nonsynonymous |
| FPC0344 | <i>PAPPA2</i>  | chr1_176564589-176564589_C_T  | 617R>C  | Substitution | Nonsynonymous |
| FPC0494 | <i>PAPPA2</i>  | chr1_176668724-176668724_G_A  | 1079V>M | Substitution | Nonsynonymous |
| Pa102   | <i>PAQR8</i>   | chr6_52268711-52268711_C_G    | 234L>V  | Substitution | Nonsynonymous |
| FPC0649 | <i>PARP2</i>   | chr14_20815052-20815052_T_C   | NA      | Insertion    | Frameshift    |
| FPC0476 | <i>PAX1</i>    | chr20_21690047-21690047_C_T   | 416A>V  | Substitution | Nonsynonymous |
| Pa230   | <i>PAXBP1</i>  | chr21_34143670-34143670_C_G   | 104A>P  | Substitution | Nonsynonymous |
| FPC0756 | <i>PBDC1</i>   | chrX_75393434-75393434_G      | NA      | Insertion    | Frameshift    |
| FPC0745 | <i>PC</i>      | chr11_66616807-66616807_T_C   | 1061K>R | Substitution | Nonsynonymous |
| FPC0494 | <i>PCCA</i>    | chr13_100958089-100958089_G_A | NA      | Substitution | Splicing      |
| Pa102   | <i>PCDH11X</i> | chrX_91066267-91066267_C_G    | 6Q>E    | Substitution | Nonsynonymous |
| FPC0649 | <i>PCDH15</i>  | chr10_55912990-55912990_C_G   | 552A>P  | Substitution | Nonsynonymous |
| FPC0747 | <i>PCDH15</i>  | chr10_56077174-56077174_G_A   | 245R>X  | Substitution | Nonsense      |
| Pa229   | <i>PCDH15</i>  | chr10_55721607-55721607_A_C   | 972F>V  | Substitution | Nonsynonymous |
| Pa230   | <i>PCDH17</i>  | chr13_58209198-58209198_G_A   | 840G>R  | Substitution | Nonsynonymous |
| FPC0652 | <i>PCDHA6</i>  | chr5_140307690-140307690_C_T  | 405R>W  | Substitution | Nonsynonymous |
| FPC0652 | <i>PCDHB2</i>  | chr5_140474496-140474496_C_T  | 41T>M   | Substitution | Nonsynonymous |
| Pa227   | <i>PCDHGA2</i> | chr5_140811129-140811129_A_G  | 268D>G  | Substitution | Nonsynonymous |
| Pa228   | <i>PCDHGA5</i> | chr5_140744415-140744415_G_T  | 173S>I  | Substitution | Nonsynonymous |
| FPC0652 | <i>PCDHGA6</i> | chr5_140754776-140754776_T_C  | 376S>P  | Substitution | Nonsynonymous |
| Pa222   | <i>PCDHGA8</i> | chr5_140772985-140772985_G_C  | 202R>T  | Substitution | Nonsynonymous |
| FPC0744 | <i>PCDHGB1</i> | chr5_140732003-140732003_G_A  | 726G>S  | Substitution | Nonsynonymous |
| FPC0135 | <i>PCLO</i>    | chr7_82451835-82451835_C_T    | 4923V>M | Substitution | Nonsynonymous |
| Pa222   | <i>PCLO</i>    | chr7_82476510-82476510_C_T    | 4570E>K | Substitution | Nonsynonymous |
| Pa222   | <i>PCNT</i>    | chr21_47754488-47754488_A_G   | 149S>G  | Substitution | Nonsynonymous |
| FPC0737 | <i>PCSK4</i>   | chr19_1488246-1488246_G_A     | 110R>W  | Substitution | Nonsynonymous |
| Pa102   | <i>PDE10A</i>  | chr6_165749697-165749697_C_A  | 728G>W  | Substitution | Nonsynonymous |
| FPC0070 | <i>PDE1B</i>   | chr12_54968938-54968938_C_T   | 374P>L  | Substitution | Nonsynonymous |
| FPC0744 | <i>PDE3A</i>   | chr12_20766419-20766419_G_A   | 352E>K  | Substitution | Nonsynonymous |
| FPC0751 | <i>PDE6B</i>   | chr4_651158-651158_G_T        | 426G>C  | Substitution | Nonsynonymous |
| FPC0649 | <i>PDK3</i>    | chrX_24549805-24549805_G_A    | 332R>H  | Substitution | Nonsynonymous |
| FPC0751 | <i>PDPN</i>    | chr1_13933769-13933769_G_A    | 133E>K  | Substitution | Nonsynonymous |
| FPC0737 | <i>PDZRN4</i>  | chr12_41967273-41967273_A_G   | NA      | Insertion    | Frameshift    |
| FPC0438 | <i>PEAR1</i>   | chr1_156875217-156875217_G_A  | NA      | Substitution | Splicing      |
| FPC0759 | <i>PEAR1</i>   | chr1_156875126-156875126_C_T  | 73R>W   | Substitution | Nonsynonymous |
| FPC0652 | <i>PENK</i>    | chr8_57354232-57354232_G_A    | 135R>W  | Substitution | Nonsynonymous |
| FPC0649 | <i>PEX5L</i>   | chr3_179526095-179526095_C_T  | 495D>N  | Substitution | Nonsynonymous |

|         |                 |                               |         |              |               |
|---------|-----------------|-------------------------------|---------|--------------|---------------|
| FPC0746 | <i>PGR</i>      | chr11_100962544-100962544_T   | NA      | Insertion    | Frameshift    |
| FPC0751 | <i>PGR</i>      | chr11_100998972-100998972_G_A | 277A>V  | Substitution | Nonsynonymous |
| FPC0747 | <i>PHACTR4</i>  | chr1_28785730-28785730_A_     | NA      | Deletion     | Frameshift    |
| Pa222   | <i>PHC1</i>     | chr12_9089869-9089869_C_T     | 859R>C  | Substitution | Nonsynonymous |
| FPC0652 | <i>PHLPP2</i>   | chr16_71736600-71736600_C_T   | 107V>I  | Substitution | Nonsynonymous |
| FPC0748 | <i>PHOSPHO2</i> | chr2_170557881-170557881_C_T  | 134L>F  | Substitution | Nonsynonymous |
| FPC0751 | <i>PHYH</i>     | chr10_13336552-13336552_C_G   | 97G>A   | Substitution | Nonsynonymous |
| FPC0751 | <i>PHYH</i>     | chr10_13336592-13336592_C_T   | 84E>K   | Substitution | Nonsynonymous |
| FPC0751 | <i>PHYH</i>     | chr10_13337575-13337575_C_A   | 56E>X   | Substitution | Nonsense      |
| FPC0625 | <i>PIBF1</i>    | chr13_73409509-73409509_A_    | NA      | Insertion    | Splicing      |
| FPC0625 | <i>PIBF1</i>    | chr13_73409509-73409509_A_    | NA      | Deletion     | Splicing      |
| FPC0751 | <i>PIDD1</i>    | chr11_800377-800377_C_T       | 706V>M  | Substitution | Nonsynonymous |
| FPC0751 | <i>PIGA</i>     | chrX_15342915-15342915_A_G    | 354S>P  | Substitution | Nonsynonymous |
| FPC0747 | <i>PIGQ</i>     | chr16_633021-633021_G_T       | 557G>V  | Substitution | Nonsynonymous |
| FPC0616 | <i>PIH1D1</i>   | chr19_49950652-49950652_G_A   | 185P>L  | Substitution | Nonsynonymous |
| FPC0649 | <i>PIK3C2G</i>  | chr12_18534755-18534755_G_A   | 605V>I  | Substitution | Nonsynonymous |
| FPC0747 | <i>PIK3CA</i>   | chr3_178927974-178927974_G_A  | 418E>K  | Substitution | Nonsynonymous |
| FPC0751 | <i>PIK3R6</i>   | chr17_8731965-8731965_G_T     | 411S>Y  | Substitution | Nonsynonymous |
| FPC0759 | <i>PISD</i>     | chr22_32017832-32017832_G_A   | 87R>W   | Substitution | Nonsynonymous |
| FPC0748 | <i>PIWIL4</i>   | chr11_94353173-94353173_T_A   | 769Y>N  | Substitution | Nonsynonymous |
| FPC0616 | <i>PJA2</i>     | chr5_108717408-108717408_A_   | NA      | Insertion    | Splicing      |
| Pa102   | <i>PKHD1</i>    | chr6_51732905-51732905_C_T    | 2497G>R | Substitution | Nonsynonymous |
| FPC0745 | <i>PKM</i>      | chr15_72499508-72499508_C_T   | 316R>Q  | Substitution | Nonsynonymous |
| FPC0347 | <i>PKNI</i>     | chr19_14561228-14561228_C_T   | 243R>C  | Substitution | Nonsynonymous |
| Pa102   | <i>PLCD4</i>    | chr2_219494297-219494297_G_A  | 344G>R  | Substitution | Nonsynonymous |
| Pa101   | <i>PLCL1</i>    | chr2_198950910-198950910_C_T  | 792A>V  | Substitution | Nonsynonymous |
| FPC0759 | <i>PLEC</i>     | chr8_144998131-144998131_C_T  | 2126R>H | Substitution | Nonsynonymous |
| Pa229   | <i>PLEC</i>     | chr8_144995279-144995279_CGTC | NA      | Insertion    | Frameshift    |
| FPC0625 | <i>PLEKHA5</i>  | chr12_19410475-19410475_T_    | NA      | Deletion     | Splicing      |
| FPC0746 | <i>PLEKHA6</i>  | chr1_204198232-204198232_C_A  | 862V>L  | Substitution | Nonsynonymous |
| Pa222   | <i>PLEKHG3</i>  | chr14_65198494-65198494_C_A   | 309Y>X  | Substitution | Nonsense      |
| FPC0745 | <i>PLEKHG4B</i> | chr5_143249-143249_G_A        | 166R>Q  | Substitution | Nonsynonymous |
| Pa222   | <i>PLEKHG6</i>  | chr12_6436775-6436775_G_A     | 676E>K  | Substitution | Nonsynonymous |
| Pa228   | <i>PLOD2</i>    | chr3_145806380-145806380_T_A  | 333H>L  | Substitution | Nonsynonymous |
| FPC0751 | <i>PLTP</i>     | chr20_44536398-44536398_C_T   | NA      | Substitution | Splicing      |
| FPC0494 | <i>PLXNA2</i>   | chr1_208315691-208315691_C_T  | 497V>I  | Substitution | Nonsynonymous |
| Pa231   | <i>PLXNA2</i>   | chr1_208227789-208227789_A_G  | 945S>P  | Substitution | Nonsynonymous |
| Pa222   | <i>PLXNA4</i>   | chr7_132192549-132192549_G_A  | 302R>C  | Substitution | Nonsynonymous |
| FPC0347 | <i>PLXNC1</i>   | chr12_94688261-94688261_G_C   | NA      | Substitution | Splicing      |
| FPC0737 | <i>PNLIP</i>    | chr10_118320000-118320000_G_A | 378G>E  | Substitution | Nonsynonymous |
| FPC0627 | <i>PNPLA6</i>   | chr19_7626171-7626171_G_A     | 1293E>K | Substitution | Nonsynonymous |
| FPC0081 | <i>PNPLA8</i>   | chr7_108155797-108155797_G_T  | 47Q>K   | Substitution | Nonsynonymous |
| FPC0081 | <i>PNPLA8</i>   | chr7_108155799-108155799_A_T  | 46L>Q   | Substitution | Nonsynonymous |
| FPC0070 | <i>PNPT1</i>    | chr2_55883510-55883510_A_     | NA      | Deletion     | Splicing      |
| FPC0625 | <i>PNPT1</i>    | chr2_55883510-55883510_A_     | NA      | Deletion     | Splicing      |
| FPC0744 | <i>POGZ</i>     | chr1_151378138-151378138_T_C  | 1125I>V | Substitution | Nonsynonymous |
| Pa228   | <i>POLR1A</i>   | chr2_86255142-86255142_A_G    | 1643L>P | Substitution | Nonsynonymous |
| Pa230   | <i>POLR2L</i>   | chr11_8429493-8429493_G_A     | 6R>C    | Substitution | Nonsynonymous |
| Pa231   | <i>POP4</i>     | chr19_30104799-30104799_C_A   | 149S>Y  | Substitution | Nonsynonymous |
| FPC0759 | <i>PPP1R14C</i> | chr6_150569880-150569880_A_T  | NA      | Substitution | Splicing      |
| FPC0476 | <i>PPP1R32</i>  | chr11_61254014-61254014_G_T   | 256V>L  | Substitution | Nonsynonymous |
| FPC0476 | <i>PPP2R2C</i>  | chr4_6380272-6380272_C_T      | 66E>K   | Substitution | Nonsynonymous |
| Pa228   | <i>PRAMI</i>    | chr19_8555768-8555768_C_T     | NA      | Substitution | Splicing      |
| FPC0747 | <i>PRDM14</i>   | chr8_70978583-70978583_T_A    | 357H>L  | Substitution | Nonsynonymous |
| FPC0649 | <i>PRDM7</i>    | chr16_90126993-90126993_A_G   | 330L>P  | Substitution | Nonsynonymous |
| FPC0070 | <i>PRF1</i>     | chr10_72360523-72360523_C_G   | 46E>Q   | Substitution | Nonsynonymous |
| FPC0625 | <i>PRKAA1</i>   | chr5_40775530-40775530_A_T    | 115Y>X  | Substitution | Nonsense      |
| FPC0747 | <i>PRKCG</i>    | chr19_54403579-54403579_G_A   | NA      | Substitution | Splicing      |
| FPC0616 | <i>PRKD2</i>    | chr19_47177940-47177940_C_T   | 826R>Q  | Substitution | Nonsynonymous |
| FPC0747 | <i>PRNP</i>     | chr20_4680464-4680464_G_A     | 200E>K  | Substitution | Nonsynonymous |
| Pa102   | <i>PROX2</i>    | chr14_75329616-75329616_G_A   | 308R>C  | Substitution | Nonsynonymous |
| FPC0135 | <i>PRPF6</i>    | chr20_62642794-62642794_G_A   | 488D>N  | Substitution | Nonsynonymous |
| FPC0728 | <i>PRPH</i>     | chr12_49689233-49689233_G_A   | 84E>K   | Substitution | Nonsynonymous |
| FPC0728 | <i>PRR12</i>    | chr19_50100977-50100977_C_T   | 1129R>C | Substitution | Nonsynonymous |
| Pa229   | <i>PRRG4</i>    | chr11_32860438-32860438_G_T   | 93W>L   | Substitution | Nonsynonymous |
| FPC0625 | <i>PRRT2</i>    | chr16_29825016-29825016_C_    | NA      | Deletion     | Frameshift    |
| FPC0649 | <i>PRSS35</i>   | chr6_84233953-84233953_C_T    | 265R>X  | Substitution | Nonsense      |
| Pa222   | <i>PRSS38</i>   | chr1_228003861-228003861_G_C  | 73W>C   | Substitution | Nonsynonymous |



|         |                      |                                |         |              |               |
|---------|----------------------|--------------------------------|---------|--------------|---------------|
| Pa222   | <i>PRSS38</i>        | chr1_228003862-228003862_C_T   | 74Q>X   | Substitution | Nonsense      |
| FPC0625 | <i>PRUNE2</i>        | chr9_79244209-79244209_A_      | NA      | Deletion     | Splicing      |
| Pa102   | <i>PSD3</i>          | chr8_18666261-18666261_T_A     | NA      | Substitution | Splicing      |
| FPC0737 | <i>PSIP1</i>         | chr9_15490051-15490051_C_A     | 74R>I   | Substitution | Nonsynonymous |
| Pa101   | <i>PSTK</i>          | chr10_124740107-124740107_C_T  | 38L>F   | Substitution | Nonsynonymous |
| FPC0745 | <i>PTCH1</i>         | chr9_98270561-98270561_G_C     | 28A>G   | Substitution | Nonsynonymous |
| FPC0070 | <i>PTCHD2</i>        | chr1_11562134-11562134_C_T     | 362A>V  | Substitution | Nonsynonymous |
| FPC0616 | <i>PTEN</i>          | chr10_89692949-89692949_T_     | NA      | Deletion     | Frameshift    |
| FPC0728 | <i>PTGDR</i>         | chr14_52734822-52734822_C_T    | 97A>V   | Substitution | Nonsynonymous |
| Pa231   | <i>PTGFRN</i>        | chr1_117487409-117487409_C_G   | 176P>R  | Substitution | Nonsynonymous |
| FPC0745 | <i>PTH1R</i>         | chr3_46944896-46944896_G_A     | 511R>H  | Substitution | Nonsynonymous |
| FPC0438 | <i>PTK7</i>          | chr6_43111275-43111279_TGTTCC_ | NA      | Deletion     | Frameshift    |
| FPC0494 | <i>PTPN12</i>        | chr7_77261689-77261689_C_G     | 674P>R  | Substitution | Nonsynonymous |
| Pa101   | <i>PTPN14</i>        | chr1_214575053-214575053_A_T   | 215F>Y  | Substitution | Nonsynonymous |
| FPC0347 | <i>PTPRF</i>         | chr1_44079328-44079328_C_T     | 1338A>V | Substitution | Nonsynonymous |
| FPC0625 | <i>PTPRS</i>         | chr19_5223023-5223023_G_A      | 927T>M  | Substitution | Nonsynonymous |
| FPC0744 | <i>PUS7L</i>         | chr12_44148883-44148883_T_A    | 56K>X   | Substitution | Nonsense      |
| FPC0476 | <i>PXDN</i>          | chr2_1670162-1670162_C_T       | 372R>Q  | Substitution | Nonsynonymous |
| FPC0652 | <i>PXDNL</i>         | chr8_52321851-52321851_G_A     | 778P>L  | Substitution | Nonsynonymous |
| FPC0737 | <i>PXDNL</i>         | chr8_52321594-52321594_G_A     | 864R>C  | Substitution | Nonsynonymous |
| FPC0625 | <i>PYGO1</i>         | chr15_55841196-55841196_A_     | NA      | Insertion    | Splicing      |
| FPC0476 | <i>RAB37</i>         | chr17_72738423-72738423_G_A    | 79V>M   | Substitution | Nonsynonymous |
| FPC0476 | <i>RAB5B</i>         | chr12_56383731-56383731_C_T    | 55A>V   | Substitution | Nonsynonymous |
| FPC0627 | <i>RACGAP1</i>       | chr12_50386126-50386126_C_T    | 494A>T  | Substitution | Nonsynonymous |
| FPC0625 | <i>RAD23B</i>        | chr9_110093971-110093972_AA_   | NA      | Deletion     | Frameshift    |
| FPC0347 | <i>RAD54L</i>        | chr1_46743877-46743877_G_A     | 723A>T  | Substitution | Nonsynonymous |
| FPC0737 | <i>RADIL</i>         | chr7_4876137-4876137_C_T       | 212R>H  | Substitution | Nonsynonymous |
| FPC0494 | <i>RAG1</i>          | chr11_36597064-36597064_G_A    | 737R>H  | Substitution | Nonsynonymous |
| FPC0745 | <i>RASAL3</i>        | chr19_15574865-15574865_G_A    | 102P>L  | Substitution | Nonsynonymous |
| FPC0135 | <i>RB1</i>           | chr13_49037879-49037879_T_C    | 707S>P  | Substitution | Nonsynonymous |
| FPC0625 | <i>RB1CC1</i>        | chr8_53543091-53543091_A_      | NA      | Insertion    | Splicing      |
| FPC0751 | <i>RBFOX1</i>        | chr16_7703894-7703894_G_A      | 299V>M  | Substitution | Nonsynonymous |
| FPC0625 | <i>RBL1</i>          | chr20_35696592-35696592_A_     | NA      | Deletion     | Splicing      |
| FPC0728 | <i>RBM10</i>         | chrX_47045120-47045120_C_      | NA      | Deletion     | Frameshift    |
| FPC0476 | <i>RBM3</i>          | chrX_48434905-48434905_A_T     | 109D>V  | Substitution | Nonsynonymous |
| Pa101   | <i>RBM39</i>         | chr20_34328759-34328759_G_A    | 13A>V   | Substitution | Nonsynonymous |
| Pa101   | <i>RBM39</i>         | chr20_34328760-34328760_C_A    | 13A>S   | Substitution | Nonsynonymous |
| FPC0347 | <i>RBMXL3</i>        | chrX_114425923-114425923_C_A   | 640A>D  | Substitution | Nonsynonymous |
| FPC0625 | <i>RC3H2</i>         | chr9_125655309-125655309_A_    | NA      | Insertion    | Splicing      |
| FPC0625 | <i>RC3H2</i>         | chr9_125655309-125655309_A_    | NA      | Deletion     | Splicing      |
| FPC0494 | <i>RCVRN</i>         | chr17_9808167-9808167_C_T      | 111V>M  | Substitution | Nonsynonymous |
| FPC0525 | <i>RECQL</i>         | chr12_21623147-21623147_A_     | NA      | Deletion     | Frameshift    |
| FPC0652 | <i>RELN</i>          | chr7_103368613-103368613_G_A   | 233A>V  | Substitution | Nonsynonymous |
| FPC0525 | <i>REERG</i>         | chr12_15262093-15262093_G_A    | 184T>M  | Substitution | Nonsynonymous |
| FPC0525 | <i>RFC1</i>          | chr4_39314458-39314458_A_G     | 433Y>H  | Substitution | Nonsynonymous |
| FPC0616 | <i>RFPL3</i>         | chr22_32756703-32756703_C_T    | 280R>C  | Substitution | Nonsynonymous |
| FPC0652 | <i>RGCC</i>          | chr13_42032417-42032417_G_T    | NA      | Substitution | Splicing      |
| FPC0645 | <i>RGS20</i>         | chr8_54791947-54791947_C_T     | 99R>W   | Substitution | Nonsynonymous |
| FPC0494 | <i>RGS3</i>          | chr9_116356285-116356285_C_A   | 29P>H   | Substitution | Nonsynonymous |
| FPC0748 | <i>RGS6</i>          | chr14_72932474-72932474_C_T    | 135L>F  | Substitution | Nonsynonymous |
| Pa228   | <i>RHO</i>           | chr3_129249760-129249760_C_T   | 135R>W  | Substitution | Nonsynonymous |
| FPC0728 | <i>RIF1</i>          | chr2_152320029-152320029_T_G   | 1332L>R | Substitution | Nonsynonymous |
| FPC0751 | <i>RIMS1</i>         | chr6_72806713-72806713_C_T     | 103R>W  | Substitution | Nonsynonymous |
| Pa102   | <i>RIMS1</i>         | chr6_72943509-72943509_C_T     | 571T>M  | Substitution | Nonsynonymous |
| FPC0494 | <i>RMDN3</i>         | chr15_41029894-41029894_T_     | NA      | Insertion    | Frameshift    |
| FPC0494 | <i>RNASE7</i>        | chr14_21511377-21511377_T_C    | 76F>L   | Substitution | Nonsynonymous |
| FPC0347 | <i>RNF111</i>        | chr15_59376329-59376329_C_T    | 767R>W  | Substitution | Nonsynonymous |
| FPC0737 | <i>RNF168</i>        | chr3_196198706-196198706_T_C   | 567Q>R  | Substitution | Nonsynonymous |
| Pa228   | <i>RNF17</i>         | chr13_25399896-25399896_G_A    | 744R>Q  | Substitution | Nonsynonymous |
| Pa229   | <i>RNF220</i>        | chr1_44878130-44878130_C_T     | 121R>W  | Substitution | Nonsynonymous |
| FPC0746 | <i>RNF43</i>         | chr17_56440757-56440757_G_A    | 154P>L  | Substitution | Nonsynonymous |
| FPC0347 | <i>ROBO2</i>         | chr3_75986741-75986741_G_T     | 33G>X   | Substitution | Nonsense      |
| FPC0626 | <i>ROBO2</i>         | chr3_75986717-75986717_G_A     | 25V>M   | Substitution | Nonsynonymous |
| FPC0627 | <i>ROR2</i>          | chr9_94488893-94488893_G_A     | 439P>L  | Substitution | Nonsynonymous |
| Pa102   | <i>RP1</i>           | chr8_55576264-55576264_A_G     | 203I>V  | Substitution | Nonsynonymous |
| FPC0728 | <i>RP11-46C24.3</i>  | chr16_89235260-89235260_C_T    | 192P>L  | Substitution | Nonsynonymous |
| FPC0625 | <i>RP11-863K10.7</i> | chr8_37593487-37593487_A_      | NA      | Deletion     | Frameshift    |
| FPC0347 | <i>RPGR</i>          | chrX_38156660-38156660_T_C     | 431I>V  | Substitution | Nonsynonymous |

|         |                 |                               |         |              |               |
|---------|-----------------|-------------------------------|---------|--------------|---------------|
| FPC0347 | <i>RPGR</i>     | chrX_38156677-38156677_C_T    | 425R>K  | Substitution | Nonsynonymous |
| FPC0745 | <i>RPGR</i>     | chrX_38163930-38163930_T_G    | 298S>R  | Substitution | Nonsynonymous |
| FPC0759 | <i>RPGRIP1</i>  | chr14_21794101-21794101_C_T   | 827R>C  | Substitution | Nonsynonymous |
| FPC0744 | <i>RPS6KA2</i>  | chr6_166843970-166843970_T_C  | 526K>E  | Substitution | Nonsynonymous |
| FPC0135 | <i>RPTOR</i>    | chr17_78897378-78897378_C_T   | 905R>W  | Substitution | Nonsynonymous |
| FPC0627 | <i>RRBP1</i>    | chr20_17639880-17639880_C_T   | 425A>T  | Substitution | Nonsynonymous |
| FPC0745 | <i>RTL1</i>     | chr14_101348803-101348803_C_T | 775V>M  | Substitution | Nonsynonymous |
| FPC0438 | <i>RTN4IP1</i>  | chr6_107070755-107070755_C_T  | 122D>N  | Substitution | Nonsynonymous |
| Pa230   | <i>RTN4R</i>    | chr22_20231161-20231161_G_A   | 16S>F   | Substitution | Nonsynonymous |
| Pa230   | <i>RUNDC1</i>   | chr17_41132930-41132930_C_G   | 113R>G  | Substitution | Nonsynonymous |
| FPC0347 | <i>RUNX1T1</i>  | chr8_92998508-92998508_G_C    | 375L>V  | Substitution | Nonsynonymous |
| FPC0525 | <i>RYR1</i>     | chr19_38993593-38993593_G_A   | 2637A>T | Substitution | Nonsynonymous |
| FPC0627 | <i>RYR1</i>     | chr19_39013699-39013699_G_A   | 3431A>T | Substitution | Nonsynonymous |
| FPC0751 | <i>RYR1</i>     | chr19_38976583-38976583_C_T   | 1763P>L | Substitution | Nonsynonymous |
| Pa102   | <i>RYR1</i>     | chr19_39055860-39055860_C_T   | 4296R>W | Substitution | Nonsynonymous |
| Pa227   | <i>SI00A7L2</i> | chr1_153410753-153410753_C_T  | 29R>H   | Substitution | Nonsynonymous |
| Pa222   | <i>SACS</i>     | chr13_23912230-23912230_G_A   | 1929R>W | Substitution | Nonsynonymous |
| Pa228   | <i>SACS</i>     | chr13_23904882-23904882_C_T   | 4378R>Q | Substitution | Nonsynonymous |
| Pa231   | <i>SAFB2</i>    | chr19_5594184-5594184_C_T     | 642R>H  | Substitution | Nonsynonymous |
| FPC0494 | <i>SALL1</i>    | chr16_51174296-51174296_C_T   | 613E>K  | Substitution | Nonsynonymous |
| FPC0756 | <i>SALL1</i>    | chr16_51175381-51175381_C_T   | 251R>H  | Substitution | Nonsynonymous |
| FPC0751 | <i>SALL3</i>    | chr18_76754563-76754563_C_T   | 858Q>X  | Substitution | Nonsense      |
| FPC0347 | <i>SAMD15</i>   | chr14_77843824-77843824_G_C   | 21E>D   | Substitution | Nonsynonymous |
| FPC0625 | <i>SAP130</i>   | chr2_128770732-128770732_A    | NA      | Deletion     | Splicing      |
| Pa222   | <i>SATB1</i>    | chr3_18436040-18436040_C_T    | 374E>K  | Substitution | Nonsynonymous |
| FPC0652 | <i>SBF2</i>     | chr11_9838424-9838424_G_T     | 1314A>E | Substitution | Nonsynonymous |
| Pa228   | <i>SCAF4</i>    | chr21_33076217-33076217_G_A   | 61P>L   | Substitution | Nonsynonymous |
| FPC0625 | <i>SCAMP1</i>   | chr5_77745857-77745857_G_T    | 245G>C  | Substitution | Nonsynonymous |
| FPC0652 | <i>SCARA5</i>   | chr8_27779321-27779321_C_T    | 228R>H  | Substitution | Nonsynonymous |
| FPC0525 | <i>SCFD1</i>    | chr14_31175055-31175055_C_T   | 506P>L  | Substitution | Nonsynonymous |
| Pa230   | <i>SCN11A</i>   | chr3_38938452-38938452_G_A    | 763R>C  | Substitution | Nonsynonymous |
| FPC0347 | <i>SCN3A</i>    | chr2_166011143-166011143_T_C  | 400Y>C  | Substitution | Nonsynonymous |
| FPC0745 | <i>SCN3A</i>    | chr2_165996047-165996047_C_A  | 697E>D  | Substitution | Nonsynonymous |
| FPC0728 | <i>SCN4A</i>    | chr17_62025396-62025396_G_A   | 1058R>W | Substitution | Nonsynonymous |
| FPC0746 | <i>SCUBE3</i>   | chr6_35200741-35200741_G      | NA      | Deletion     | Frameshift    |
| FPC0745 | <i>SCYL3</i>    | chr1_169836049-169836049_G_A  | 268T>M  | Substitution | Nonsynonymous |
| FPC0135 | <i>SDF4</i>     | chr1_1152915-1152915_G_A      | 356R>C  | Substitution | Nonsynonymous |
| FPC0737 | <i>SEC16A</i>   | chr9_139354515-139354515_T    | NA      | Deletion     | Frameshift    |
| FPC0476 | <i>SEC24A</i>   | chr5_134002645-134002645_A_T  | 233D>V  | Substitution | Nonsynonymous |
| FPC0625 | <i>SEC24D</i>   | chr4_119666218-119666218_A    | NA      | Deletion     | Splicing      |
| FPC0745 | <i>SECISBP2</i> | chr9_91949629-91949629_T_C    | 358I>T  | Substitution | Nonsynonymous |
| Pa230   | <i>SEMA3A</i>   | chr7_83591143-83591143_C_A    | NA      | Substitution | Splicing      |
| FPC0751 | <i>SEMA3D</i>   | chr7_84642109-84642109_T_G    | 586D>A  | Substitution | Nonsynonymous |
| FPC0649 | <i>SEMA6D</i>   | chr15_48056480-48056480_G_A   | 359E>K  | Substitution | Nonsynonymous |
| Pa229   | <i>SEMA6D</i>   | chr15_48062708-48062708_G_T   | 650V>F  | Substitution | Nonsynonymous |
| FPC0625 | <i>SENP3</i>    | chr17_7470288-7470288_A_G     | 436K>R  | Substitution | Nonsynonymous |
| Pa229   | <i>SEPT5</i>    | chr22_19707634-19707634_G_A   | NA      | Substitution | Splicing      |
| FPC0347 | <i>SERPINA7</i> | chrX_105278361-105278361_C_A  | 303L>F  | Substitution | Nonsynonymous |
| FPC0747 | <i>SETDB1</i>   | chr1_150917624-150917624_G    | NA      | Insertion    | Frameshift    |
| FPC0756 | <i>SF3B1</i>    | chr2_198266834-198266834_T_C  | 700K>E  | Substitution | Nonsynonymous |
| FPC0751 | <i>SGCD</i>     | chr5_156186295-156186295_C_T  | 256T>M  | Substitution | Nonsynonymous |
| FPC0347 | <i>SGOL2</i>    | chr2_201436704-201436704_A_C  | 545K>N  | Substitution | Nonsynonymous |
| FPC0627 | <i>SGOL2</i>    | chr2_201436921-201436921_C_T  | 618R>W  | Substitution | Nonsynonymous |
| FPC0649 | <i>SH3TC2</i>   | chr5_148406893-148406893_C_T  | 801C>Y  | Substitution | Nonsynonymous |
| Pa102   | <i>SHMT2</i>    | chr12_57627424-57627424_C_T   | 368R>X  | Substitution | Nonsense      |
| FPC0649 | <i>SLAH3</i>    | chr13_46357961-46357961_C_G   | 123V>L  | Substitution | Nonsynonymous |
| FPC0746 | <i>SIDT2</i>    | chr11_117052591-117052591_C_T | 125S>L  | Substitution | Nonsynonymous |
| Pa227   | <i>SIGLEC5</i>  | chr19_52132823-52132823_C_T   | 163S>N  | Substitution | Nonsynonymous |
| Pa228   | <i>SIGLEC6</i>  | chr19_52034564-52034564_G_A   | 93F>L   | Substitution | Nonsynonymous |
| FPC0625 | <i>SKA3</i>     | chr13_21729953-21729953_A     | NA      | Insertion    | Splicing      |
| FPC0625 | <i>SKP2</i>     | chr5_36183987-36183987_C      | NA      | Insertion    | Frameshift    |
| FPC0625 | <i>SKP2</i>     | chr5_36183991-36183991_T_A    | 371C>S  | Substitution | Nonsynonymous |
| FPC0727 | <i>SKP2</i>     | chr5_36166719-36166719_G_A    | 164R>H  | Substitution | Nonsynonymous |
| FPC0347 | <i>SLC14A2</i>  | chr18_43253660-43253660_C_T   | 797A>V  | Substitution | Nonsynonymous |
| Pa102   | <i>SLC15A3</i>  | chr11_60718618-60718618_C_T   | 136A>T  | Substitution | Nonsynonymous |
| FPC0344 | <i>SLC17A1</i>  | chr6_25813424-25813424_C_T    | 212V>I  | Substitution | Nonsynonymous |
| FPC0476 | <i>SLC17A2</i>  | chr6_25918786-25918786_G_A    | 193S>F  | Substitution | Nonsynonymous |
| Pa101   | <i>SLC17A7</i>  | chr19_49938117-49938117_C_T   | 153A>T  | Substitution | Nonsynonymous |

|         |                 |                               |         |              |               |
|---------|-----------------|-------------------------------|---------|--------------|---------------|
| FPC0625 | <i>SLC18A1</i>  | chr8_20036003-20036003_T_C    | 164I>V  | Substitution | Nonsynonymous |
| FPC0652 | <i>SLC1A6</i>   | chr19_15079239-15079239_C_T   | 142A>T  | Substitution | Nonsynonymous |
| Pa222   | <i>SLC22A1</i>  | chr6_160579546-160579546_A_G  | NA      | Substitution | Splicing      |
| FPC0494 | <i>SLC22A9</i>  | chr11_63138694-63138694_G_T   | 164G>C  | Substitution | Nonsynonymous |
| FPC0494 | <i>SLC22A9</i>  | chr11_63138695-63138695_G_C   | 164G>A  | Substitution | Nonsynonymous |
| FPC0070 | <i>SLC23A3</i>  | chr2_220033370-220033370_G_A  | NA      | Substitution | Splicing      |
| FPC0625 | <i>SLC25A36</i> | chr3_140678385-140678385_A    | NA      | Insertion    | Splicing      |
| FPC0625 | <i>SLC25A36</i> | chr3_140678385-140678385_A    | NA      | Deletion     | Splicing      |
| FPC0747 | <i>SLC25A42</i> | chr19_19221543-19221543_G_A   | 272R>H  | Substitution | Nonsynonymous |
| Pa222   | <i>SLC27A3</i>  | chr1_153750707-153750707_G_A  | 458R>H  | Substitution | Nonsynonymous |
| FPC0616 | <i>SLC27A6</i>  | chr5_128301873-128301873_G_A  | 15V>I   | Substitution | Nonsynonymous |
| FPC0652 | <i>SLC2A12</i>  | chr6_134349987-134349987_C_T  | 326V>I  | Substitution | Nonsynonymous |
| Pa229   | <i>SLC30A10</i> | chr1_220100437-220100437_G_T  | 217F>L  | Substitution | Nonsynonymous |
| FPC0745 | <i>SLC30A8</i>  | chr8_118183351-118183351_T_A  | 303L>Q  | Substitution | Nonsynonymous |
| FPC0746 | <i>SLC34A1</i>  | chr5_176813507-176813507_G_A  | 158V>M  | Substitution | Nonsynonymous |
| FPC0627 | <i>SLC36A3</i>  | chr5_150666970-150666970_G_A  | 223T>M  | Substitution | Nonsynonymous |
| Pa101   | <i>SLC44A1</i>  | chr9_108126862-108126862_T_G  | 372F>V  | Substitution | Nonsynonymous |
| Pa230   | <i>SLC44A5</i>  | chr1_75683560-75683560_G_A    | 539R>C  | Substitution | Nonsynonymous |
| FPC0625 | <i>SLC46A1</i>  | chr17_26727721-26727721_G_A   | NA      | Substitution | Splicing      |
| Pa229   | <i>SLC5A10</i>  | chr17_18922878-18922878_G_A   | 478V>I  | Substitution | Nonsynonymous |
| Pa102   | <i>SLC5A7</i>   | chr2_108627139-108627139_G_T  | 522S>I  | Substitution | Nonsynonymous |
| FPC0438 | <i>SLC6A15</i>  | chr12_85277657-85277657_C_T   | 246G>D  | Substitution | Nonsynonymous |
| FPC0525 | <i>SLC6A15</i>  | chr12_85277705-85277705_A_T   | 230I>N  | Substitution | Nonsynonymous |
| FPC0627 | <i>SLC6A17</i>  | chr1_110740189-110740189_C_A  | 595P>T  | Substitution | Nonsynonymous |
| Pa101   | <i>SLC6A3</i>   | chr5_1420769-1420769_A_G      | 281L>P  | Substitution | Nonsynonymous |
| FPC0745 | <i>SLC7A9</i>   | chr19_33353388-33353388_C_T   | 195G>R  | Substitution | Nonsynonymous |
| Pa231   | <i>SLC9A3</i>   | chr5_483524-483524_G_T        | 336R>S  | Substitution | Nonsynonymous |
| FPC0751 | <i>SLC9A7</i>   | chrX_46495076-46495076_C_T    | 541V>I  | Substitution | Nonsynonymous |
| FPC0747 | <i>SLCO1C1</i>  | chr12_20905319-20905319_A     | NA      | Insertion    | Frameshift    |
| FPC0745 | <i>SLIT2</i>    | chr4_20599961-20599961_G      | NA      | Insertion    | Frameshift    |
| Pa102   | <i>SLIT2</i>    | chr4_20533674-20533674_C_T    | 561R>C  | Substitution | Nonsynonymous |
| FPC0135 | <i>SLIT3</i>    | chr5_168096941-168096941_C_T  | 1395E>K | Substitution | Nonsynonymous |
| Pa222   | <i>SLITRK3</i>  | chr3_164906423-164906423_C_A  | 732K>N  | Substitution | Nonsynonymous |
| FPC0347 | <i>SMAD4</i>    | chr18_48581171-48581171_A_T   | 159K>X  | Substitution | Nonsense      |
| FPC0476 | <i>SMAD4</i>    | chr18_48593406-48593406_G_C   | 386G>A  | Substitution | Nonsynonymous |
| FPC0494 | <i>SMAD4</i>    | chr18_48591977-48591977_G_A   | NA      | Substitution | Splicing      |
| FPC0612 | <i>SMAD4</i>    | chr18_48581243-48581243_C_T   | 183Q>X  | Substitution | Nonsense      |
| FPC0616 | <i>SMAD4</i>    | chr18_48591919-48591919_G_A   | 361R>H  | Substitution | Nonsynonymous |
| FPC0625 | <i>SMAD4</i>    | chr18_48575054-48575054_A_G   | NA      | Substitution | Splicing      |
| FPC0725 | <i>SMAD4</i>    | chr18_48603023-48603023_C_T   | 442Q>X  | Substitution | Nonsense      |
| FPC0744 | <i>SMAD4</i>    | chr18_48575055-48575055_G     | NA      | Deletion     | Splicing      |
| FPC0745 | <i>SMAD4</i>    | chr18_48591918-48591918_C_T   | 361R>C  | Substitution | Nonsynonymous |
| FPC0751 | <i>SMAD4</i>    | chr18_48593417-48593417_G_T   | 390E>X  | Substitution | Nonsense      |
| Pa101   | <i>SMAD4</i>    | chr18_48584607-48584607_T     | NA      | Insertion    | Frameshift    |
| Pa228   | <i>SMAD4</i>    | chr18_48591977-48591977_G_T   | NA      | Substitution | Splicing      |
| Pa230   | <i>SMAD4</i>    | chr18_48591903-48591903_C_A   | 356P>T  | Substitution | Nonsynonymous |
| FPC0625 | <i>SMAD5</i>    | chr5_135513087-135513087_T_A  | NA      | Substitution | Splicing      |
| FPC0745 | <i>SMARCA1</i>  | chrX_128599676-128599676_G_A  | 951R>C  | Substitution | Nonsynonymous |
| FPC0649 | <i>SMARCC1</i>  | chr3_47752232-47752232_C_T    | 287V>M  | Substitution | Nonsynonymous |
| FPC0649 | <i>SMARCC1</i>  | chr3_47752298-47752298_C_T    | 265V>I  | Substitution | Nonsynonymous |
| FPC0649 | <i>SMARCD3</i>  | chr7_150938994-150938994_C_T  | 249R>H  | Substitution | Nonsynonymous |
| FPC0756 | <i>SMC3</i>     | chr10_112342336-112342336_A_G | 247E>G  | Substitution | Nonsynonymous |
| FPC0347 | <i>SMG1</i>     | chr16_18852993-18852993_G_C   | 2197P>R | Substitution | Nonsynonymous |
| FPC0438 | <i>SMG1</i>     | chr16_18840678-18840678_C_A   | 3178R>M | Substitution | Nonsynonymous |
| FPC0616 | <i>SMG1</i>     | chr16_18841007-18841009_AAA_  | NA      | Deletion     | In-frame      |
| FPC0649 | <i>SMG6</i>     | chr17_2203926-2203926_G_A     | 41R>C   | Substitution | Nonsynonymous |
| FPC0748 | <i>SMPD3</i>    | chr16_68405439-68405439_C_A   | 216G>C  | Substitution | Nonsynonymous |
| Pa230   | <i>SNAP91</i>   | chr6_84304147-84304147_C_T    | 460A>T  | Substitution | Nonsynonymous |
| Pa230   | <i>SNCAIP</i>   | chr5_121776330-121776330_A_T  | 435I>F  | Substitution | Nonsynonymous |
| FPC0652 | <i>SNRPF</i>    | chr12_96259162-96259162_A_T   | 64I>L   | Substitution | Nonsynonymous |
| FPC0625 | <i>SNRPG</i>    | chr2_70514418-70514418_C_A    | 89S>I   | Substitution | Nonsynonymous |
| FPC0744 | <i>SNTA1</i>    | chr20_32000520-32000520_G_A   | 257A>V  | Substitution | Nonsynonymous |
| FPC0347 | <i>SOGA3</i>    | chr6_127797568-127797568_C_A  | 535E>X  | Substitution | Nonsense      |
| FPC0759 | <i>SORBS1</i>   | chr10_97197258-97197258_C_T   | 22G>E   | Substitution | Nonsynonymous |
| FPC0494 | <i>SOWAHB</i>   | chr4_77817612-77817612_C_G    | 464G>A  | Substitution | Nonsynonymous |
| Pa229   | <i>SOX5</i>     | chr12_23818482-23818482_G_C   | 276P>R  | Substitution | Nonsynonymous |
| FPC0649 | <i>SP9</i>      | chr2_175201342-175201342_G_T  | 177A>S  | Substitution | Nonsynonymous |
| FPC0627 | <i>SPAG17</i>   | chr1_118644361-118644361_A_   | NA      | Deletion     | Splicing      |

|         |                |                               |         |              |               |
|---------|----------------|-------------------------------|---------|--------------|---------------|
| FPC0652 | <i>SPATA18</i> | chr4_52945961-52945961_G_A    | 411V>I  | Substitution | Nonsynonymous |
| FPC0344 | <i>SPATC1</i>  | chr8_145096225-145096225_C_T  | 467R>W  | Substitution | Nonsynonymous |
| FPC0649 | <i>SPATS2L</i> | chr2_201342480-201342480_G_A  | 468R>H  | Substitution | Nonsynonymous |
| FPC0652 | <i>SPATS2L</i> | chr2_201342515-201342515_C_T  | 480R>W  | Substitution | Nonsynonymous |
| Pa228   | <i>SPDYE4</i>  | chr17_8660702-8660702_C_T     | 73R>H   | Substitution | Nonsynonymous |
| Pa102   | <i>SPEG</i>    | chr2_220313453-220313453_CCAT | NA      | Insertion    | Frameshift    |
| FPC0737 | <i>SPG11</i>   | chr15_44944092-44944092_G_C   | 351N>K  | Substitution | Nonsynonymous |
| Pa230   | <i>SPHKAP</i>  | chr2_228883900-228883900_G_T  | 557A>D  | Substitution | Nonsynonymous |
| FPC0649 | <i>SPII</i>    | chr11_47397252-47397252_G_A   | 26T>M   | Substitution | Nonsynonymous |
| Pa228   | <i>SPONI</i>   | chr11_13984492-13984492_C_T   | 14P>L   | Substitution | Nonsynonymous |
| Pa222   | <i>SPPL2C</i>  | chr17_43922928-43922928_G_A   | 219R>Q  | Substitution | Nonsynonymous |
| FPC0649 | <i>SPRED1</i>  | chr15_38643689-38643689_T_A   | 387F>I  | Substitution | Nonsynonymous |
| FPC0737 | <i>SPRY1</i>   | chr4_124323063-124323063_C_T  | 106A>V  | Substitution | Nonsynonymous |
| FPC0652 | <i>SPTAN1</i>  | chr9_131388967-131388967_G_A  | NA      | Substitution | Splicing      |
| FPC0745 | <i>SPTAN1</i>  | chr9_131346247-131346247_A_G  | 731Q>R  | Substitution | Nonsynonymous |
| Pa228   | <i>SPTB</i>    | chr14_65264500-65264500_T_C   | 377N>D  | Substitution | Nonsynonymous |
| FPC0649 | <i>SPTBN5</i>  | chr15_42167715-42167716_CA_   | NA      | Deletion     | Frameshift    |
| FPC0070 | <i>SRFBP1</i>  | chr5_121356311-121356311_G_A  | 294R>Q  | Substitution | Nonsynonymous |
| FPC0347 | <i>SRRM2</i>   | chr16_2809011-2809011_C_T     | 207R>W  | Substitution | Nonsynonymous |
| FPC0652 | <i>SRRM4</i>   | chr12_119583235-119583235_C_T | 274P>L  | Substitution | Nonsynonymous |
| FPC0745 | <i>SSH1</i>    | chr12_109196141-109196141_A_C | 320S>A  | Substitution | Nonsynonymous |
| FPC0476 | <i>SSPO</i>    | chr7_149510793-149510793_G_A  | 3360V>M | Substitution | Nonsynonymous |
| Pa102   | <i>ST14</i>    | chr11_130068884-130068884_A_G | 576N>S  | Substitution | Nonsynonymous |
| FPC0494 | <i>ST5</i>     | chr11_8734210-8734210_T_C     | 687E>G  | Substitution | Nonsynonymous |
| Pa229   | <i>STAB2</i>   | chr12_104136295-104136295_G_T | 1998E>D | Substitution | Nonsynonymous |
| FPC0625 | <i>STAM2</i>   | chr2_153004817-153004817_A_   | NA      | Deletion     | Splicing      |
| Pa102   | <i>STAT5B</i>  | chr17_40359678-40359678_G_A   | 659R>C  | Substitution | Nonsynonymous |
| FPC0746 | <i>STBD1</i>   | chr4_77227941-77227941_G_A    | 7A>T    | Substitution | Nonsynonymous |
| FPC0135 | <i>STC1</i>    | chr8_23709859-23709859_C_T    | 53G>S   | Substitution | Nonsynonymous |
| Pa228   | <i>STK24</i>   | chr13_99105453-99105453_T_G   | 436S>R  | Substitution | Nonsynonymous |
| FPC0746 | <i>STK38L</i>  | chr12_27461319-27461319_A_    | NA      | Insertion    | Frameshift    |
| Pa222   | <i>STXBP1</i>  | chr9_130444732-130444732_G_A  | 532R>H  | Substitution | Nonsynonymous |
| FPC0627 | <i>SUDS3</i>   | chr12_118828946-118828946_C_T | 126R>X  | Substitution | Nonsense      |
| FPC0625 | <i>SVEP1</i>   | chr9_113137746-113137746_A_   | NA      | Deletion     | Splicing      |
| FPC0625 | <i>SVEP1</i>   | chr9_113137746-113137748_AAA_ | NA      | Deletion     | Splicing      |
| Pa101   | <i>SYCP2</i>   | chr20_58467047-58467047_T     | NA      | Insertion    | Frameshift    |
| FPC0649 | <i>SYNDIG1</i> | chr20_24523888-24523888_G_A   | 52R>Q   | Substitution | Nonsynonymous |
| FPC0652 | <i>SYNE1</i>   | chr6_152776647-152776647_G_A  | 936R>X  | Substitution | Nonsense      |
| FPC0759 | <i>SYNE1</i>   | chr6_152737804-152737804_G_A  | 1923A>V | Substitution | Nonsynonymous |
| FPC0347 | <i>SYNJ1</i>   | chr21_34038745-34038745_G_C   | 650I>M  | Substitution | Nonsynonymous |
| Pa231   | <i>SYNM</i>    | chr15_99672770-99672770_G_A   | 1401R>K | Substitution | Nonsynonymous |
| FPC0745 | <i>SYT1</i>    | chr12_79693277-79693277_T     | NA      | Insertion    | Frameshift    |
| FPC0745 | <i>SYT10</i>   | chr12_33532801-33532801_C_T   | 489R>Q  | Substitution | Nonsynonymous |
| FPC0737 | <i>SYT14</i>   | chr4_68928723-68928723_C_A    | 35C>F   | Substitution | Nonsynonymous |
| FPC0746 | <i>SYT14</i>   | chr1_210267681-210267681_A_T  | 153R>X  | Substitution | Nonsense      |
| Pa101   | <i>TANC2</i>   | chr17_61483557-61483557_G_A   | 1096A>T | Substitution | Nonsynonymous |
| FPC0625 | <i>TANK</i>    | chr2_162036188-162036188_T_G  | 5I>M    | Substitution | Nonsynonymous |
| FPC0649 | <i>TAOK2</i>   | chr16_29998315-29998315_G_A   | 908G>R  | Substitution | Nonsynonymous |
| FPC0494 | <i>TAS1R1</i>  | chr1_6630992-6630992_G_T      | 72G>V   | Substitution | Nonsynonymous |
| FPC0476 | <i>TAS2R7</i>  | chr12_10954544-10954544_C_T   | 209R>Q  | Substitution | Nonsynonymous |
| FPC0627 | <i>TBC1D14</i> | chr4_6925336-6925336_G_A      | 74G>R   | Substitution | Nonsynonymous |
| FPC0476 | <i>TBC1D23</i> | chr3_100014147-100014147_G_T  | 243E>X  | Substitution | Nonsense      |
| Pa101   | <i>TBC1D5</i>  | chr3_17349597-17349597_T_G    | 342E>A  | Substitution | Nonsynonymous |
| FPC0737 | <i>TBLXR1</i>  | chr3_176769378-176769378_G_A  | 114A>V  | Substitution | Nonsynonymous |
| Pa222   | <i>TCERG1L</i> | chr10_133107472-133107472_C_A | 145A>S  | Substitution | Nonsynonymous |
| Pa228   | <i>TCF12</i>   | chr15_57574705-57574705_G_A   | 681V>I  | Substitution | Nonsynonymous |
| Pa102   | <i>TCF21</i>   | chr6_134212933-134212933_C_G  | 178A>G  | Substitution | Nonsynonymous |
| Pa230   | <i>TCF7</i>    | chr5_133477982-133477982_T_G  | 248F>V  | Substitution | Nonsynonymous |
| FPC0344 | <i>TCOF1</i>   | chr5_149776183-149776183_G_A  | 1337E>K | Substitution | Nonsynonymous |
| Pa101   | <i>TCP10</i>   | chr6_167790110-167790110_C_T  | 167R>H  | Substitution | Nonsynonymous |
| FPC0070 | <i>TDRD15</i>  | chr2_21363738-21363738_G_T    | 1133E>D | Substitution | Nonsynonymous |
| Pa227   | <i>TDRD15</i>  | chr2_21362784-21362784_G_T    | 815W>C  | Substitution | Nonsynonymous |
| Pa222   | <i>TDRD9</i>   | chr14_104501344-104501344_G_A | 1223G>S | Substitution | Nonsynonymous |
| FPC0135 | <i>TEKT3</i>   | chr17_15217494-15217494_G_A   | 263T>M  | Substitution | Nonsynonymous |
| FPC0627 | <i>TEKT3</i>   | chr17_15207273-15207273_G_A   | 485R>W  | Substitution | Nonsynonymous |
| Pa230   | <i>TENM3</i>   | chr4_183652080-183652080_C_T  | 919R>X  | Substitution | Nonsense      |
| FPC0649 | <i>TENM4</i>   | chr11_78380510-78380510_C_T   | 2294D>N | Substitution | Nonsynonymous |
| FPC0747 | <i>TFIP11</i>  | chr22_26895297-26895297_G_A   | 368R>W  | Substitution | Nonsynonymous |

|         |                 |                               |         |              |               |
|---------|-----------------|-------------------------------|---------|--------------|---------------|
| FPC0737 | <i>TGFBR2</i>   | chr3_30729962-30729962_C_T    | 520R>X  | Substitution | Nonsense      |
| FPC0476 | <i>TH</i>       | chr11_2190908-2190908_G_A     | 126A>V  | Substitution | Nonsynonymous |
| FPC0625 | <i>THAP2</i>    | chr12_72070509-72070509_G_C   | 103C>S  | Substitution | Nonsynonymous |
| FPC0747 | <i>THEMIS2</i>  | chr1_28206445-28206445_C_T    | 176R>X  | Substitution | Nonsense      |
| Pa228   | <i>THSD7B</i>   | chr2_137917932-137917932_A_   | NA      | Deletion     | Frameshift    |
| FPC0728 | <i>TIAM2</i>    | chr6_155504488-155504488_G_A  | 973R>Q  | Substitution | Nonsynonymous |
| Pa229   | <i>TIMM23</i>   | chr10_51620361-51620361_G_C   | 43S>C   | Substitution | Nonsynonymous |
| Pa228   | <i>TJP3</i>     | chr19_3728660-3728660_C_A     | 55S>Y   | Substitution | Nonsynonymous |
| Pa231   | <i>TLE3</i>     | chr15_70343800-70343800_C_T   | 714W>X  | Substitution | Nonsense      |
| FPC0344 | <i>TLX3</i>     | chr5_170737196-170737196_G_A  | 155G>D  | Substitution | Nonsynonymous |
| FPC0081 | <i>TM2D3</i>    | chr15_102191909-102191909_G_  | NA      | Deletion     | Frameshift    |
| Pa102   | <i>TMEM132B</i> | chr12_126138972-126138972_C_A | 985L>M  | Substitution | Nonsynonymous |
| FPC0737 | <i>TMEM132D</i> | chr12_129559212-129559212_A_T | 836S>R  | Substitution | Nonsynonymous |
| FPC0745 | <i>TMEM132E</i> | chr17_32959783-32959783_G_A   | 425A>T  | Substitution | Nonsynonymous |
| FPC0438 | <i>TMEM168</i>  | chr7_112424331-112424331_C_A  | 184V>F  | Substitution | Nonsynonymous |
| FPC0747 | <i>TMEM168</i>  | chr7_112424721-112424721_C_T  | 54V>I   | Substitution | Nonsynonymous |
| FPC0438 | <i>TMEM173</i>  | chr5_138857888-138857888_G_T  | 242N>K  | Substitution | Nonsynonymous |
| FPC0135 | <i>TMEM184C</i> | chr4_148550778-148550778_G_A  | 201E>K  | Substitution | Nonsynonymous |
| FPC0744 | <i>TMEM2</i>    | chr9_74345134-74345134_A_T    | 603H>Q  | Substitution | Nonsynonymous |
| FPC0494 | <i>TMEM213</i>  | chr7_138482751-138482751_C_A  | 19Q>K   | Substitution | Nonsynonymous |
| FPC0652 | <i>TMEM237</i>  | chr2_202494461-202494461_C_T  | 223R>Q  | Substitution | Nonsynonymous |
| FPC0747 | <i>TMEM44</i>   | chr3_194344021-194344021_C_T  | 182G>S  | Substitution | Nonsynonymous |
| FPC0751 | <i>TMEM45A</i>  | chr3_100287685-100287685_C_T  | 203P>L  | Substitution | Nonsynonymous |
| Pa230   | <i>TMEM5</i>    | chr12_64196186-64196186_G_T   | NA      | Substitution | Splicing      |
| FPC0652 | <i>TMEM63C</i>  | chr14_77706951-77706951_G_A   | 355R>H  | Substitution | Nonsynonymous |
| FPC0494 | <i>TMIGD2</i>   | chr19_4292807-4292807_C_T     | 213G>E  | Substitution | Nonsynonymous |
| Pa101   | <i>TMTC3</i>    | chr12_88586434-88586434_T_C   | 587L>P  | Substitution | Nonsynonymous |
| FPC0737 | <i>TNC</i>      | chr9_117836073-117836073_G_A  | 1008P>L | Substitution | Nonsynonymous |
| FPC0625 | <i>TNFAIP6</i>  | chr2_152236046-152236047_AA_  | NA      | Deletion     | Frameshift    |
| FPC0747 | <i>TNFSF9</i>   | chr19_6534939-6534939_C_      | NA      | Deletion     | Frameshift    |
| FPC0746 | <i>TNNI3</i>    | chr19_55668461-55668461_C_T   | 22R>H   | Substitution | Nonsynonymous |
| FPC0347 | <i>TNS3</i>     | chr7_47408573-47408573_C_T    | 557S>N  | Substitution | Nonsynonymous |
| FPC0625 | <i>TNS3</i>     | chr7_47342790-47342790_G_A    | 1072T>M | Substitution | Nonsynonymous |
| FPC0728 | <i>TNXB</i>     | chr6_32037602-32037602_C_T    | 1772R>H | Substitution | Nonsynonymous |
| FPC0438 | <i>TOE1</i>     | chr1_45808874-45808874_C_T    | 345R>W  | Substitution | Nonsynonymous |
| FPC0070 | <i>TP53</i>     | chr17_7577022-7577022_G_A     | 306R>X  | Substitution | Nonsense      |
| FPC0135 | <i>TP53</i>     | chr17_7577539-7577539_G_A     | 248R>W  | Substitution | Nonsynonymous |
| FPC0344 | <i>TP53</i>     | chr17_7576928-7576928_T_C     | NA      | Substitution | Splicing      |
| FPC0438 | <i>TP53</i>     | chr17_7578192-7578192_G_      | NA      | Insertion    | Frameshift    |
| FPC0476 | <i>TP53</i>     | chr17_7577570-7577570_C_T     | 237M>I  | Substitution | Nonsynonymous |
| FPC0525 | <i>TP53</i>     | chr17_7578478-7578478_G_C     | 151P>R  | Substitution | Nonsynonymous |
| FPC0612 | <i>TP53</i>     | chr17_7577094-7577094_G_A     | 282R>W  | Substitution | Nonsynonymous |
| FPC0616 | <i>TP53</i>     | chr17_7579355-7579355_A_G     | 111L>P  | Substitution | Nonsynonymous |
| FPC0625 | <i>TP53</i>     | chr17_7579495-7579495_G_      | NA      | Deletion     | Frameshift    |
| FPC0627 | <i>TP53</i>     | chr17_7577121-7577121_G_A     | 273R>C  | Substitution | Nonsynonymous |
| FPC0649 | <i>TP53</i>     | chr17_7578212-7578212_G_A     | 213R>X  | Substitution | Nonsense      |
| FPC0652 | <i>TP53</i>     | chr17_7578203-7578203_C_T     | 216V>M  | Substitution | Nonsynonymous |
| FPC0726 | <i>TP53</i>     | chr17_7577568-7577570_CAC_    | NA      | Deletion     | In-frame      |
| FPC0744 | <i>TP53</i>     | chr17_7577535-7577535_C_A     | 249R>M  | Substitution | Nonsynonymous |
| FPC0745 | <i>TP53</i>     | chr17_7578406-7578406_C_T     | 175R>H  | Substitution | Nonsynonymous |
| FPC0746 | <i>TP53</i>     | chr17_7577120-7577120_C_T     | 273R>H  | Substitution | Nonsynonymous |
| FPC0747 | <i>TP53</i>     | chr17_7577568-7577568_C_T     | 238C>Y  | Substitution | Nonsynonymous |
| FPC0748 | <i>TP53</i>     | chr17_7577112-7577112_C_G     | 276A>P  | Substitution | Nonsynonymous |
| FPC0751 | <i>TP53</i>     | chr17_7578442-7578442_T_C     | 163Y>C  | Substitution | Nonsynonymous |
| FPC0759 | <i>TP53</i>     | chr17_7577115-7577115_A_G     | 275C>R  | Substitution | Nonsynonymous |
| Pa101   | <i>TP53</i>     | chr17_7577036-7577036_G_      | NA      | Insertion    | Frameshift    |
| Pa102   | <i>TP53</i>     | chr17_7577117-7577117_A_G     | 274V>A  | Substitution | Nonsynonymous |
| Pa222   | <i>TP53</i>     | chr17_7574009-7574012_TCTC_   | NA      | Deletion     | Frameshift    |
| Pa222   | <i>TP53</i>     | chr17_7574013-7574013_G_C     | 338F>L  | Substitution | Nonsynonymous |
| Pa227   | <i>TP53</i>     | chr17_7578263-7578263_G_A     | 196R>X  | Substitution | Nonsense      |
| Pa227   | <i>TP53</i>     | chr17_7578266-7578266_T_A     | 195I>F  | Substitution | Nonsynonymous |
| Pa228   | <i>TP53</i>     | chr17_7578554-7578554_A_C     | 126Y>D  | Substitution | Nonsynonymous |
| Pa229   | <i>TP53</i>     | chr17_7577120-7577120_C_      | NA      | Deletion     | Frameshift    |
| Pa230   | <i>TP53</i>     | chr17_7576928-7576928_T_C     | NA      | Substitution | Splicing      |
| Pa231   | <i>TP53</i>     | chr17_7577538-7577538_C_T     | 248R>Q  | Substitution | Nonsynonymous |
| Pa101   | <i>TPSAB1</i>   | chr16_1291226-1291226_A_G     | 45Q>R   | Substitution | Nonsynonymous |
| FPC0652 | <i>TRAF1</i>    | chr9_123675635-123675635_G_A  | 226R>C  | Substitution | Nonsynonymous |
| FPC0745 | <i>TRAPPC12</i> | chr2_3392385-3392385_G_A      | 331V>M  | Substitution | Nonsynonymous |

|         |                |                                 |          |              |               |
|---------|----------------|---------------------------------|----------|--------------|---------------|
| Pa229   | <i>TRGC1</i>   | chr7_38299727-38299727_T_C      | 100R>G   | Substitution | Nonsynonymous |
| Pa230   | <i>TRIM23</i>  | chr5_64892267-64892267_A_C      | 467H>Q   | Substitution | Nonsynonymous |
| FPC0616 | <i>TRIML1</i>  | chr4_189061730-189061730_G_T    | 153A>S   | Substitution | Nonsynonymous |
| FPC0751 | <i>TRIO</i>    | chr5_14359638-14359638_G_A      | 797D>N   | Substitution | Nonsynonymous |
| FPC0748 | <i>TRMT10C</i> | chr3_101283824-101283824_A_T    | 67K>X    | Substitution | Nonsense      |
| FPC0627 | <i>TRO</i>     | chrX_54956485-54956485_G_A      | 1110G>S  | Substitution | Nonsynonymous |
| FPC0645 | <i>TRO</i>     | chrX_54956515-54956515_G_A      | 1120G>S  | Substitution | Nonsynonymous |
| FPC0135 | <i>TRPC3</i>   | chr4_122853484-122853484_G_A    | 310T>M   | Substitution | Nonsynonymous |
| FPC0625 | <i>TRPC4</i>   | chr13_38320595-38320596_AA_     | NA       | Deletion     | Splicing      |
| FPC0751 | <i>TRPM5</i>   | chr11_2427966-2427966_T_A       | 1059K>M  | Substitution | Nonsynonymous |
| FPC0728 | <i>TRPV4</i>   | chr12_110246208-110246208_C_T   | 151R>Q   | Substitution | Nonsynonymous |
| FPC0347 | <i>TSC2</i>    | chr16_2125846-2125846_G_C       | 864Q>H   | Substitution | Nonsynonymous |
| FPC0347 | <i>TSC2</i>    | chr16_2125848-2125848_A_T       | 865Y>F   | Substitution | Nonsynonymous |
| FPC0476 | <i>TSPAN10</i> | chr17_79615121-79615121_G_A     | 289A>T   | Substitution | Nonsynonymous |
| Pa101   | <i>TSPAN19</i> | chr12_85423572-85423572_A_      | NA       | Deletion     | Splicing      |
| Pa229   | <i>TSPEAR</i>  | chr21_45987892-45987892_G_A     | NA       | Substitution | Splicing      |
| Pa102   | <i>TST</i>     | chr22_37414349-37414349_G_A     | 142T>I   | Substitution | Nonsynonymous |
| FPC0737 | <i>TTC1</i>    | chr5_159437618-159437618_G_A    | 28C>Y    | Substitution | Nonsynonymous |
| FPC0745 | <i>TTC14</i>   | chr3_180327954-180327954_G_T    | 646R>I   | Substitution | Nonsynonymous |
| FPC0135 | <i>TTN</i>     | chr2_179486707-179486707_A_T    | 12413I>N | Substitution | Nonsynonymous |
| FPC0344 | <i>TTN</i>     | chr2_179501172-179501172_C_T    | 11193R>H | Substitution | Nonsynonymous |
| FPC0347 | <i>TTN</i>     | chr2_179603006-179603006_C_A    | 3481S>I  | Substitution | Nonsynonymous |
| Pa228   | <i>TTN</i>     | chr2_179587536-179587536_G_A    | 6120R>W  | Substitution | Nonsynonymous |
| Pa227   | <i>TUBB6</i>   | chr18_12325092-12325092_G_A     | 102A>T   | Substitution | Nonsynonymous |
| FPC0737 | <i>TULP4</i>   | chr6_158922708-158922708_G_G    | NA       | Substitution | Splicing      |
| FPC0347 | <i>TVP23C</i>  | chr17_15443734-15443734_A_G     | 202W>R   | Substitution | Nonsynonymous |
| FPC0347 | <i>TVP23C</i>  | chr17_15443742-15443742_C_G     | 199S>T   | Substitution | Nonsynonymous |
| FPC0625 | <i>TVP23C</i>  | chr17_15343522-15343522_T_C     | NA       | Substitution | Splicing      |
| FPC0759 | <i>TXNDC2</i>  | chr18_9887329-9887329_T_C       | 285S>P   | Substitution | Nonsynonymous |
| Pa231   | <i>TXNDC9</i>  | chr2_99936266-99936266_A_       | NA       | Deletion     | Splicing      |
| Pa102   | <i>TYRP1</i>   | chr9_12702411-12702411_ACAA_    | NA       | Deletion     | Frameshift    |
| FPC0081 | <i>U2AF2</i>   | chr19_56172500-56172500_T_A     | 144M>K   | Substitution | Nonsynonymous |
| FPC0744 | <i>UBE2J1</i>  | chr6_90042839-90042839_G_C      | 215P>R   | Substitution | Nonsynonymous |
| Pa222   | <i>UBE2J1</i>  | chr6_90047964-90047964_G_C      | 130L>V   | Substitution | Nonsynonymous |
| FPC0625 | <i>UBE3B</i>   | chr12_109924383-109924386_AACA_ | NA       | Deletion     | Splicing      |
| FPC0625 | <i>UBE3B</i>   | chr12_109924384-109924385_AC_   | NA       | Deletion     | Splicing      |
| FPC0652 | <i>UBR3</i>    | chr2_170871808-170871808_G_A    | NA       | Insertion    | Frameshift    |
| FPC0347 | <i>UBR4</i>    | chr1_19510544-19510544_A_T      | 688S>R   | Substitution | Nonsynonymous |
| Pa101   | <i>UBR4</i>    | chr1_19446082-19446082_A_T      | 3475F>Y  | Substitution | Nonsynonymous |
| Pa101   | <i>UCP1</i>    | chr4_141489105-141489105_A_T    | 51S>R    | Substitution | Nonsynonymous |
| FPC0625 | <i>UGDH</i>    | chr4_39511531-39511531_A_       | NA       | Deletion     | Splicing      |
| FPC0347 | <i>UGGT1</i>   | chr2_128903391-128903391_C_G    | 622Y>X   | Substitution | Nonsense      |
| Pa231   | <i>UNC5A</i>   | chr5_176304576-176304576_G_A    | 503V>I   | Substitution | Nonsynonymous |
| FPC0652 | <i>UPK3A</i>   | chr22_45685025-45685025_G_A     | NA       | Substitution | Splicing      |
| FPC0347 | <i>URGCP</i>   | chr7_43918481-43918481_G_A      | 194S>L   | Substitution | Nonsynonymous |
| FPC0616 | <i>USF2</i>    | chr19_35761632-35761632_G_A     | 198V>I   | Substitution | Nonsynonymous |
| FPC0727 | <i>USH2A</i>   | chr1_216363567-216363567_G_A    | 1465A>V  | Substitution | Nonsynonymous |
| FPC0751 | <i>USP35</i>   | chr11_77921330-77921330_G_A     | 810R>H   | Substitution | Nonsynonymous |
| FPC0616 | <i>VASN</i>    | chr16_4430957-4430957_G_A       | 27G>S    | Substitution | Nonsynonymous |
| Pa227   | <i>VHLL</i>    | chr1_156268713-156268713_G_A    | 90R>C    | Substitution | Nonsynonymous |
| FPC0745 | <i>VIPAS39</i> | chr14_77896056-77896056_C_T     | 412E>K   | Substitution | Nonsynonymous |
| FPC0744 | <i>VPS13D</i>  | chr1_12438525-12438525_G_T      | 3654G>V  | Substitution | Nonsynonymous |
| FPC0625 | <i>VPS35</i>   | chr16_46708575-46708575_A_      | NA       | Deletion     | Splicing      |
| Pa227   | <i>VPS4B</i>   | chr18_61089473-61089473_T_C     | 7N>S     | Substitution | Nonsynonymous |
| FPC0728 | <i>VPS52</i>   | chr6_33231813-33231813_C_T      | 531R>Q   | Substitution | Nonsynonymous |
| FPC0745 | <i>VPS8</i>    | chr3_184588550-184588550_G_T    | 564C>F   | Substitution | Nonsynonymous |
| FPC0751 | <i>VRK2</i>    | chr2_58386554-58386554_A_       | NA       | Insertion    | Frameshift    |
| FPC0476 | <i>VRK3</i>    | chr19_50512610-50512610_T_G     | 58T>P    | Substitution | Nonsynonymous |
| FPC0525 | <i>VRTN</i>    | chr14_74824463-74824463_G_A     | 326R>Q   | Substitution | Nonsynonymous |
| FPC0625 | <i>VWA3B</i>   | chr2_98907090-98907090_T_       | NA       | Insertion    | Frameshift    |
| FPC0476 | <i>VWCE</i>    | chr11_61026391-61026391_G_A     | 875S>L   | Substitution | Nonsynonymous |
| FPC0476 | <i>VWF</i>     | chr12_6138531-6138531_C_T       | 982V>M   | Substitution | Nonsynonymous |
| FPC0737 | <i>WAC</i>     | chr10_28878720-28878720_A_G     | 146Y>C   | Substitution | Nonsynonymous |
| Pa228   | <i>WAS</i>     | chrX_48542706-48542706_C_T      | 56A>V    | Substitution | Nonsynonymous |
| Pa102   | <i>WASF2</i>   | chr1_27741432-27741432_C_T      | 188R>Q   | Substitution | Nonsynonymous |
| Pa229   | <i>WDFY3</i>   | chr4_85708835-85708835_G_A      | 1234S>L  | Substitution | Nonsynonymous |
| Pa229   | <i>WDFY4</i>   | chr10_50081701-50081701_C_T     | 2303R>C  | Substitution | Nonsynonymous |
| FPC0728 | <i>WDR1</i>    | chr4_10079453-10079453_G_T      | 498S>Y   | Substitution | Nonsynonymous |

|         |                |                               |         |              |               |
|---------|----------------|-------------------------------|---------|--------------|---------------|
| FPC0494 | <i>WDR17</i>   | chr4_177073053-177073053_G_A  | 823A>T  | Substitution | Nonsynonymous |
| FPC0344 | <i>WDR3</i>    | chr1_118475967-118475967_C_T  | 9R>C    | Substitution | Nonsynonymous |
| Pa231   | <i>WDR66</i>   | chr5_117773701-117773701_G_T  | 208L>I  | Substitution | Nonsynonymous |
| FPC0525 | <i>WDR78</i>   | chr1_67306159-67306159_G_T    | 496T>K  | Substitution | Nonsynonymous |
| FPC0347 | <i>WDR81</i>   | chr17_1631350-1631352_GAG_    | NA      | Deletion     | In-frame      |
| FPC0476 | <i>WFS1</i>    | chr4_6303708-6303708_A_G      | 729D>G  | Substitution | Nonsynonymous |
| FPC0744 | <i>WNK4</i>    | chr17_40935976-40935976_G_T   | 271E>D  | Substitution | Nonsynonymous |
| FPC0744 | <i>WNK4</i>    | chr17_40935977-40935977_A_T   | 272M>L  | Substitution | Nonsynonymous |
| FPC0494 | <i>WWC1</i>    | chr5_167826492-167826492_G_A  | NA      | Substitution | Splicing      |
| FPC0745 | <i>XIRP2</i>   | chr2_168108339-168108339_T_A  | 3479N>K | Substitution | Nonsynonymous |
| Pa229   | <i>XKR5</i>    | chr8_6673373-6673373_T_G      | 292D>A  | Substitution | Nonsynonymous |
| FPC0347 | <i>XPNPEP2</i> | chrX_128884450-128884450_C_T  | 215T>I  | Substitution | Nonsynonymous |
| FPC0625 | <i>XPO4</i>    | chr13_21370399-21370399_A_    | NA      | Deletion     | Splicing      |
| FPC0070 | <i>YTHDC1</i>  | chr4_69188627-69188627_C_A    | 481E>X  | Substitution | Nonsense      |
| FPC0746 | <i>ZBBX</i>    | chr3_167039950-167039952_TCT_ | NA      | Deletion     | In-frame      |
| FPC0744 | <i>ZBTB10</i>  | chr8_81399227-81399227_G_     | NA      | Deletion     | Frameshift    |
| FPC0759 | <i>ZBTB17</i>  | chr1_16270769-16270769_G_A    | 403A>V  | Substitution | Nonsynonymous |
| Pa101   | <i>ZBTB21</i>  | chr21_43412930-43412932_AGT_  | NA      | Deletion     | In-frame      |
| FPC0652 | <i>ZBTB46</i>  | chr20_62378341-62378341_G_A   | 571S>L  | Substitution | Nonsynonymous |
| FPC0745 | <i>ZC3H12B</i> | chrX_64722293-64722293_G_     | NA      | Insertion    | Frameshift    |
| FPC0494 | <i>ZC3H18</i>  | chr16_88695191-88695193_GCT_  | NA      | Deletion     | In-frame      |
| FPC0746 | <i>ZFP42</i>   | chr4_188924752-188924752_C_T  | 264T>M  | Substitution | Nonsynonymous |
| FPC0652 | <i>ZIC1</i>    | chr3_147128434-147128434_G_A  | 179G>S  | Substitution | Nonsynonymous |
| FPC0525 | <i>ZMAT1</i>   | chrX_101138613-101138613_G_A  | 596R>X  | Substitution | Nonsense      |
| FPC0737 | <i>ZMYM3</i>   | chrX_70467303-70467303_G_A    | 736R>C  | Substitution | Nonsynonymous |
| FPC0745 | <i>ZMYM3</i>   | chrX_70470042-70470042_T_A    | 362N>I  | Substitution | Nonsynonymous |
| Pa229   | <i>ZNF134</i>  | chr19_58132520-58132520_G_T   | 345E>X  | Substitution | Nonsense      |
| FPC0746 | <i>ZNF148</i>  | chr3_124951967-124951967_C_T  | 535V>I  | Substitution | Nonsynonymous |
| Pa231   | <i>ZNF19</i>   | chr16_71510176-71510176_C_A   | NA      | Substitution | Splicing      |
| FPC0625 | <i>ZNF234</i>  | chr19_44662272-44662272_A_T   | 701*>C  | Substitution | Nonsynonymous |
| Pa222   | <i>ZNF330</i>  | chr4_142153743-142153743_C_G  | 212P>R  | Substitution | Nonsynonymous |
| FPC0745 | <i>ZNF337</i>  | chr20_25656692-25656692_C_T   | 411R>Q  | Substitution | Nonsynonymous |
| FPC0745 | <i>ZNF43</i>   | chr19_21992086-21992086_A_T   | 251N>K  | Substitution | Nonsynonymous |
| FPC0625 | <i>ZNF451</i>  | chr6_56963875-56963875_C_A    | 41P>H   | Substitution | Nonsynonymous |
| Pa222   | <i>ZNF462</i>  | chr9_109690782-109690782_T_C  | 1530V>A | Substitution | Nonsynonymous |
| Pa230   | <i>ZNF48</i>   | chr16_30409205-30409205_C_T   | 212R>W  | Substitution | Nonsynonymous |
| FPC0070 | <i>ZNF556</i>  | chr19_2877513-2877513_G_A     | 186R>H  | Substitution | Nonsynonymous |
| FPC0751 | <i>ZNF571</i>  | chr19_38056754-38056754_C_A   | 192E>D  | Substitution | Nonsynonymous |
| FPC0745 | <i>ZNF592</i>  | chr15_85343170-85343170_A_G   | 1079T>A | Substitution | Nonsynonymous |
| FPC0070 | <i>ZNF606</i>  | chr19_58490501-58490501_T_G   | 516E>A  | Substitution | Nonsynonymous |
| Pa228   | <i>ZNF623</i>  | chr8_144733502-144733502_A_G  | 487Y>C  | Substitution | Nonsynonymous |
| FPC0747 | <i>ZNF644</i>  | chr1_91403886-91403886_T_A    | 1009K>X | Substitution | Nonsense      |
| Pa222   | <i>ZNF652</i>  | chr17_47394922-47394922_C_A   | 56G>X   | Substitution | Nonsense      |
| FPC0759 | <i>ZNF682</i>  | chr19_20117230-20117230_C_T   | 361V>I  | Substitution | Nonsynonymous |
| FPC0625 | <i>ZNF714</i>  | chr19_21299774-21299774_T_A   | 102Y>N  | Substitution | Nonsynonymous |
| FPC0745 | <i>ZNF746</i>  | chr7_149171580-149171580_G_   | NA      | Deletion     | Frameshift    |
| FPC0746 | <i>ZNF785</i>  | chr16_30594329-30594329_G_A   | 257A>V  | Substitution | Nonsynonymous |
| Pa227   | <i>ZNF804B</i> | chr7_88956781-88956781_T_G    | 125S>A  | Substitution | Nonsynonymous |
| FPC0737 | <i>ZNF841</i>  | chr19_52568760-52568760_G_A   | 792P>L  | Substitution | Nonsynonymous |
| FPC0744 | <i>ZNFX1</i>   | chr20_47864839-47864839_G_T   | 1574F>L | Substitution | Nonsynonymous |
| Pa102   | <i>ZSCAN1</i>  | chr19_58564841-58564841_C_G   | 217P>A  | Substitution | Nonsynonymous |
| FPC0745 | <i>ZZZ3</i>    | chr1_78045264-78045264_G_A    | 677S>F  | Substitution | Nonsynonymous |

<sup>a</sup>Genomic coordinates are in hg19 human genome format and are on the + strand. <sup>b</sup>NA - not applicable as variant is INDEL and/or splice site.

FPC - familial pancreatic cancer

**Supplementary Table S12.** Summary of somatic mutation data for FPC patient tumors by gene

| <b>Gene</b>     | <b>Number of somatic mutations</b> | <b>Number of FPC patients with somatic mutation in tumor</b> | <b>Percentage of FPC patients with a somatic mutation in tumor (%)</b> |
|-----------------|------------------------------------|--------------------------------------------------------------|------------------------------------------------------------------------|
| <i>KRAS</i>     | 33                                 | 33                                                           | 84.6                                                                   |
| <i>TP53</i>     | 30                                 | 28                                                           | 71.8                                                                   |
| <i>SMAD4</i>    | 13                                 | 13                                                           | 33.3                                                                   |
| <i>CDKN2A</i>   | 5                                  | 5                                                            | 12.8                                                                   |
| <i>NEB</i>      | 4                                  | 4                                                            | 10.3                                                                   |
| <i>RYR1</i>     | 4                                  | 4                                                            | 10.3                                                                   |
| <i>TTN</i>      | 4                                  | 4                                                            | 10.3                                                                   |
| <i>ARHGEF4</i>  | 3                                  | 3                                                            | 7.7                                                                    |
| <i>ARID1A</i>   | 3                                  | 3                                                            | 7.7                                                                    |
| <i>DCHS1</i>    | 3                                  | 3                                                            | 7.7                                                                    |
| <i>DNAH7</i>    | 4                                  | 3                                                            | 7.7                                                                    |
| <i>FBN2</i>     | 3                                  | 3                                                            | 7.7                                                                    |
| <i>LRP1B</i>    | 3                                  | 3                                                            | 7.7                                                                    |
| <i>MYO7B</i>    | 3                                  | 3                                                            | 7.7                                                                    |
| <i>PCDH15</i>   | 3                                  | 3                                                            | 7.7                                                                    |
| <i>SMG1</i>     | 3                                  | 3                                                            | 7.7                                                                    |
| <i>ACVR2A</i>   | 2                                  | 2                                                            | 5.1                                                                    |
| <i>AMER3</i>    | 2                                  | 2                                                            | 5.1                                                                    |
| <i>AMOT</i>     | 2                                  | 2                                                            | 5.1                                                                    |
| <i>ANO2</i>     | 2                                  | 2                                                            | 5.1                                                                    |
| <i>BOC</i>      | 2                                  | 2                                                            | 5.1                                                                    |
| <i>CACNA1H</i>  | 2                                  | 2                                                            | 5.1                                                                    |
| <i>CARD10</i>   | 2                                  | 2                                                            | 5.1                                                                    |
| <i>CDH19</i>    | 2                                  | 2                                                            | 5.1                                                                    |
| <i>COL11A1</i>  | 2                                  | 2                                                            | 5.1                                                                    |
| <i>CREB3L1</i>  | 2                                  | 2                                                            | 5.1                                                                    |
| <i>CUL9</i>     | 2                                  | 2                                                            | 5.1                                                                    |
| <i>CFAP47</i>   | 2                                  | 2                                                            | 5.1                                                                    |
| <i>DHX34</i>    | 2                                  | 2                                                            | 5.1                                                                    |
| <i>DYNC2H1</i>  | 2                                  | 2                                                            | 5.1                                                                    |
| <i>ECD</i>      | 2                                  | 2                                                            | 5.1                                                                    |
| <i>EVPL</i>     | 2                                  | 2                                                            | 5.1                                                                    |
| <i>FANCM</i>    | 2                                  | 2                                                            | 5.1                                                                    |
| <i>FAT2</i>     | 2                                  | 2                                                            | 5.1                                                                    |
| <i>GLI3</i>     | 2                                  | 2                                                            | 5.1                                                                    |
| <i>HCN4</i>     | 2                                  | 2                                                            | 5.1                                                                    |
| <i>HS3ST1</i>   | 2                                  | 2                                                            | 5.1                                                                    |
| <i>KCNT2</i>    | 3                                  | 2                                                            | 5.1                                                                    |
| <i>KIAA1109</i> | 2                                  | 2                                                            | 5.1                                                                    |
| <i>KIAA2022</i> | 2                                  | 2                                                            | 5.1                                                                    |
| <i>LRP2</i>     | 2                                  | 2                                                            | 5.1                                                                    |
| <i>LYST</i>     | 2                                  | 2                                                            | 5.1                                                                    |
| <i>MAGI2</i>    | 2                                  | 2                                                            | 5.1                                                                    |
| <i>MAP2K1</i>   | 2                                  | 2                                                            | 5.1                                                                    |
| <i>KMT2C</i>    | 2                                  | 2                                                            | 5.1                                                                    |
| <i>MMEL1</i>    | 2                                  | 2                                                            | 5.1                                                                    |
| <i>MTMR1</i>    | 2                                  | 2                                                            | 5.1                                                                    |
| <i>NLRP5</i>    | 2                                  | 2                                                            | 5.1                                                                    |
| <i>NPHS1</i>    | 2                                  | 2                                                            | 5.1                                                                    |
| <i>NRAP</i>     | 2                                  | 2                                                            | 5.1                                                                    |



|                   |   |   |     |
|-------------------|---|---|-----|
| <i>NRXN3</i>      | 2 | 2 | 5.1 |
| <i>OBSCN</i>      | 2 | 2 | 5.1 |
| <i>PAPPA2</i>     | 2 | 2 | 5.1 |
| <i>PCLO</i>       | 2 | 2 | 5.1 |
| <i>PEAR1</i>      | 2 | 2 | 5.1 |
| <i>PGR</i>        | 2 | 2 | 5.1 |
| <i>PLEC</i>       | 2 | 2 | 5.1 |
| <i>PLXNA2</i>     | 2 | 2 | 5.1 |
| <i>PNPT1</i>      | 2 | 2 | 5.1 |
| <i>PXDNL</i>      | 2 | 2 | 5.1 |
| <i>RIMS1</i>      | 2 | 2 | 5.1 |
| <i>ROBO2</i>      | 2 | 2 | 5.1 |
| <i>RPGR</i>       | 3 | 2 | 5.1 |
| <i>SACS</i>       | 2 | 2 | 5.1 |
| <i>SALL1</i>      | 2 | 2 | 5.1 |
| <i>SCN3A</i>      | 2 | 2 | 5.1 |
| <i>SEMA6D</i>     | 2 | 2 | 5.1 |
| <i>SGOL2</i>      | 2 | 2 | 5.1 |
| <i>SKP2</i>       | 3 | 2 | 5.1 |
| <i>SLC6A15</i>    | 2 | 2 | 5.1 |
| <i>SLIT2</i>      | 2 | 2 | 5.1 |
| <i>SPATS2L</i>    | 2 | 2 | 5.1 |
| <i>SPTAN1</i>     | 2 | 2 | 5.1 |
| <i>SYNE1</i>      | 2 | 2 | 5.1 |
| <i>SYT14</i>      | 2 | 2 | 5.1 |
| <i>TDRD15</i>     | 2 | 2 | 5.1 |
| <i>TEKT3</i>      | 2 | 2 | 5.1 |
| <i>TMEM168</i>    | 2 | 2 | 5.1 |
| <i>TNS3</i>       | 2 | 2 | 5.1 |
| <i>TRO</i>        | 2 | 2 | 5.1 |
| <i>TVP23C</i>     | 3 | 2 | 5.1 |
| <i>UBE2J1</i>     | 2 | 2 | 5.1 |
| <i>UBR4</i>       | 2 | 2 | 5.1 |
| <i>ZMYM3</i>      | 2 | 2 | 5.1 |
| <i>SEPT5</i>      | 1 | 1 | 2.6 |
| <i>AADAC</i>      | 1 | 1 | 2.6 |
| <i>ABCA1</i>      | 1 | 1 | 2.6 |
| <i>ABCA10</i>     | 1 | 1 | 2.6 |
| <i>ABCA13</i>     | 2 | 1 | 2.6 |
| <i>ABCA6</i>      | 1 | 1 | 2.6 |
| <i>ABCA8</i>      | 1 | 1 | 2.6 |
| <i>ABCC11</i>     | 1 | 1 | 2.6 |
| <i>ABCC4</i>      | 1 | 1 | 2.6 |
| <i>ABCC5</i>      | 1 | 1 | 2.6 |
| <i>ABCC6</i>      | 1 | 1 | 2.6 |
| <i>ABCG4</i>      | 1 | 1 | 2.6 |
| <i>ABI3BP</i>     | 2 | 1 | 2.6 |
| <i>AC009336.1</i> | 1 | 1 | 2.6 |
| <i>AC034236.1</i> | 1 | 1 | 2.6 |
| <i>AC134980.3</i> | 1 | 1 | 2.6 |
| <i>ACACA</i>      | 1 | 1 | 2.6 |
| <i>ACACB</i>      | 1 | 1 | 2.6 |
| <i>ACADS</i>      | 1 | 1 | 2.6 |
| <i>ACHE</i>       | 1 | 1 | 2.6 |

|                    |   |   |     |
|--------------------|---|---|-----|
| <i>ACLY</i>        | 1 | 1 | 2.6 |
| <i>ACTR10</i>      | 1 | 1 | 2.6 |
| <i>ACVR1B</i>      | 1 | 1 | 2.6 |
| <i>ADAM11</i>      | 1 | 1 | 2.6 |
| <i>ADAM23</i>      | 1 | 1 | 2.6 |
| <i>ADAM29</i>      | 1 | 1 | 2.6 |
| <i>ADAMTS3</i>     | 1 | 1 | 2.6 |
| <i>ADAMTSL2</i>    | 1 | 1 | 2.6 |
| <i>ADAT3</i>       | 1 | 1 | 2.6 |
| <i>ADCY1</i>       | 1 | 1 | 2.6 |
| <i>ADCY7</i>       | 1 | 1 | 2.6 |
| <i>ADCY8</i>       | 1 | 1 | 2.6 |
| <i>ADD2</i>        | 2 | 1 | 2.6 |
| <i>ADIPOQ</i>      | 1 | 1 | 2.6 |
| <i>ADPRHL1</i>     | 1 | 1 | 2.6 |
| <i>ADRA2B</i>      | 1 | 1 | 2.6 |
| <i>ADRA2C</i>      | 1 | 1 | 2.6 |
| <i>AFF1</i>        | 1 | 1 | 2.6 |
| <i>AGBL5</i>       | 1 | 1 | 2.6 |
| <i>AGPAT3</i>      | 1 | 1 | 2.6 |
| <i>AGPS</i>        | 1 | 1 | 2.6 |
| <i>AHSP</i>        | 1 | 1 | 2.6 |
| <i>AK9</i>         | 1 | 1 | 2.6 |
| <i>AKNA</i>        | 1 | 1 | 2.6 |
| <i>AKR1C3</i>      | 1 | 1 | 2.6 |
| <i>AL117190.6</i>  | 1 | 1 | 2.6 |
| <i>AL365190.16</i> | 1 | 1 | 2.6 |
| <i>ALCAM</i>       | 1 | 1 | 2.6 |
| <i>ALDH3B1</i>     | 1 | 1 | 2.6 |
| <i>ALDH9A1</i>     | 1 | 1 | 2.6 |
| <i>ALDOA</i>       | 1 | 1 | 2.6 |
| <i>ALG9</i>        | 1 | 1 | 2.6 |
| <i>ALOX12B</i>     | 1 | 1 | 2.6 |
| <i>ALPK3</i>       | 1 | 1 | 2.6 |
| <i>AMY2A</i>       | 1 | 1 | 2.6 |
| <i>ANAPC1</i>      | 1 | 1 | 2.6 |
| <i>ANKDD1B</i>     | 1 | 1 | 2.6 |
| <i>ANKHD1</i>      | 1 | 1 | 2.6 |
| <i>ANKRD17</i>     | 1 | 1 | 2.6 |
| <i>ANKRD40</i>     | 1 | 1 | 2.6 |
| <i>ANKS1B</i>      | 1 | 1 | 2.6 |
| <i>ANO7</i>        | 1 | 1 | 2.6 |
| <i>AP2A1</i>       | 1 | 1 | 2.6 |
| <i>AP4B1</i>       | 1 | 1 | 2.6 |
| <i>APCDD1L</i>     | 1 | 1 | 2.6 |
| <i>APIP</i>        | 1 | 1 | 2.6 |
| <i>APLP1</i>       | 1 | 1 | 2.6 |
| <i>AQP12A</i>      | 1 | 1 | 2.6 |
| <i>AQR</i>         | 1 | 1 | 2.6 |
| <i>ARFGEF1</i>     | 1 | 1 | 2.6 |
| <i>ARHGAP17</i>    | 1 | 1 | 2.6 |
| <i>ARHGAP18</i>    | 1 | 1 | 2.6 |
| <i>ARHGAP20</i>    | 1 | 1 | 2.6 |
| <i>ARHGAP22</i>    | 1 | 1 | 2.6 |

|                  |   |   |     |
|------------------|---|---|-----|
| <i>ARHGAP23</i>  | 1 | 1 | 2.6 |
| <i>ARHGAP26</i>  | 1 | 1 | 2.6 |
| <i>ARHGAP27</i>  | 1 | 1 | 2.6 |
| <i>ARHGAP44</i>  | 1 | 1 | 2.6 |
| <i>ARHGEF1</i>   | 1 | 1 | 2.6 |
| <i>ARID2</i>     | 1 | 1 | 2.6 |
| <i>ARID3C</i>    | 1 | 1 | 2.6 |
| <i>ARMC4</i>     | 1 | 1 | 2.6 |
| <i>ARMCX5</i>    | 1 | 1 | 2.6 |
| <i>ARR3</i>      | 1 | 1 | 2.6 |
| <i>ARSK</i>      | 1 | 1 | 2.6 |
| <i>ART3</i>      | 1 | 1 | 2.6 |
| <i>ASB2</i>      | 1 | 1 | 2.6 |
| <i>ASH1L</i>     | 1 | 1 | 2.6 |
| <i>ASIC2</i>     | 1 | 1 | 2.6 |
| <i>ASPH</i>      | 1 | 1 | 2.6 |
| <i>ASTL</i>      | 1 | 1 | 2.6 |
| <i>ATAD2B</i>    | 1 | 1 | 2.6 |
| <i>ATAD3B</i>    | 1 | 1 | 2.6 |
| <i>ATF6B</i>     | 1 | 1 | 2.6 |
| <i>ATP10D</i>    | 1 | 1 | 2.6 |
| <i>ATP8A2</i>    | 1 | 1 | 2.6 |
| <i>ATRX</i>      | 1 | 1 | 2.6 |
| <i>AUP1</i>      | 1 | 1 | 2.6 |
| <i>B3GALT1</i>   | 1 | 1 | 2.6 |
| <i>ADGRB2</i>    | 1 | 1 | 2.6 |
| <i>ADGRB3</i>    | 1 | 1 | 2.6 |
| <i>BBS12</i>     | 1 | 1 | 2.6 |
| <i>BCAS1</i>     | 1 | 1 | 2.6 |
| <i>BCL2A1</i>    | 1 | 1 | 2.6 |
| <i>BCL6</i>      | 1 | 1 | 2.6 |
| <i>BCLAF1</i>    | 1 | 1 | 2.6 |
| <i>BEND4</i>     | 1 | 1 | 2.6 |
| <i>BICD2</i>     | 1 | 1 | 2.6 |
| <i>BIN1</i>      | 1 | 1 | 2.6 |
| <i>BIRC6</i>     | 1 | 1 | 2.6 |
| <i>BOLL</i>      | 1 | 1 | 2.6 |
| <i>BPTF</i>      | 1 | 1 | 2.6 |
| <i>BRCA2</i>     | 1 | 1 | 2.6 |
| <i>BRD9</i>      | 1 | 1 | 2.6 |
| <i>BTBD10</i>    | 1 | 1 | 2.6 |
| <i>BTG2</i>      | 1 | 1 | 2.6 |
| <i>BUB1B</i>     | 1 | 1 | 2.6 |
| <i>BZW2</i>      | 1 | 1 | 2.6 |
| <i>EDRF1</i>     | 1 | 1 | 2.6 |
| <i>C10orf76</i>  | 1 | 1 | 2.6 |
| <i>C10orf90</i>  | 1 | 1 | 2.6 |
| <i>C11orf87</i>  | 1 | 1 | 2.6 |
| <i>C14orf169</i> | 1 | 1 | 2.6 |
| <i>C15orf40</i>  | 1 | 1 | 2.6 |
| <i>PRR35</i>     | 1 | 1 | 2.6 |
| <i>C16orf71</i>  | 1 | 1 | 2.6 |
| <i>C16orf93</i>  | 1 | 1 | 2.6 |
| <i>C16orf96</i>  | 1 | 1 | 2.6 |

|                  |   |   |     |
|------------------|---|---|-----|
| <i>C17orf104</i> | 1 | 1 | 2.6 |
| <i>C17orf97</i>  | 1 | 1 | 2.6 |
| <i>C19orf26</i>  | 1 | 1 | 2.6 |
| <i>C1orf100</i>  | 1 | 1 | 2.6 |
| <i>C1orf147</i>  | 1 | 1 | 2.6 |
| <i>CIART</i>     | 1 | 1 | 2.6 |
| <i>CFAP61</i>    | 2 | 1 | 2.6 |
| <i>C2orf40</i>   | 1 | 1 | 2.6 |
| <i>C5orf47</i>   | 1 | 1 | 2.6 |
| <i>C6orf10</i>   | 1 | 1 | 2.6 |
| <i>ZBED6CL</i>   | 1 | 1 | 2.6 |
| <i>CABP2</i>     | 1 | 1 | 2.6 |
| <i>CACNA1E</i>   | 1 | 1 | 2.6 |
| <i>CACNA1G</i>   | 1 | 1 | 2.6 |
| <i>CACNA1I</i>   | 2 | 1 | 2.6 |
| <i>CAD</i>       | 1 | 1 | 2.6 |
| <i>CALCR</i>     | 1 | 1 | 2.6 |
| <i>CALD1</i>     | 1 | 1 | 2.6 |
| <i>CAMTA1</i>    | 1 | 1 | 2.6 |
| <i>CAND1</i>     | 1 | 1 | 2.6 |
| <i>CANT1</i>     | 1 | 1 | 2.6 |
| <i>CASQ2</i>     | 1 | 1 | 2.6 |
| <i>CATSPER1</i>  | 1 | 1 | 2.6 |
| <i>CBFA2T3</i>   | 1 | 1 | 2.6 |
| <i>CBX8</i>      | 1 | 1 | 2.6 |
| <i>CCBL1</i>     | 1 | 1 | 2.6 |
| <i>CCDC109B</i>  | 1 | 1 | 2.6 |
| <i>CCDC114</i>   | 1 | 1 | 2.6 |
| <i>CCDC125</i>   | 1 | 1 | 2.6 |
| <i>CCDC13</i>    | 1 | 1 | 2.6 |
| <i>CCDC146</i>   | 1 | 1 | 2.6 |
| <i>CCDC169</i>   | 1 | 1 | 2.6 |
| <i>CCDC175</i>   | 2 | 1 | 2.6 |
| <i>CCDC39</i>    | 1 | 1 | 2.6 |
| <i>CCDC40</i>    | 1 | 1 | 2.6 |
| <i>CCDC53</i>    | 1 | 1 | 2.6 |
| <i>CCDC67</i>    | 1 | 1 | 2.6 |
| <i>CCDC71</i>    | 1 | 1 | 2.6 |
| <i>CCDC8</i>     | 1 | 1 | 2.6 |
| <i>CCDS757.1</i> | 1 | 1 | 2.6 |
| <i>CCNC</i>      | 1 | 1 | 2.6 |
| <i>CCNJ</i>      | 1 | 1 | 2.6 |
| <i>CCPG1</i>     | 1 | 1 | 2.6 |
| <i>CCSER2</i>    | 1 | 1 | 2.6 |
| <i>CCT7</i>      | 1 | 1 | 2.6 |
| <i>CD163</i>     | 1 | 1 | 2.6 |
| <i>CD163L1</i>   | 1 | 1 | 2.6 |
| <i>CD177</i>     | 1 | 1 | 2.6 |
| <i>CD1A</i>      | 1 | 1 | 2.6 |
| <i>CD44</i>      | 1 | 1 | 2.6 |
| <i>CD70</i>      | 1 | 1 | 2.6 |
| <i>CD81</i>      | 1 | 1 | 2.6 |
| <i>CD93</i>      | 1 | 1 | 2.6 |
| <i>CDC26</i>     | 1 | 1 | 2.6 |

|                 |   |   |     |
|-----------------|---|---|-----|
| <i>CDC42BPB</i> | 1 | 1 | 2.6 |
| <i>CDC7</i>     | 1 | 1 | 2.6 |
| <i>CDH2</i>     | 1 | 1 | 2.6 |
| <i>CDH22</i>    | 1 | 1 | 2.6 |
| <i>CDH23</i>    | 1 | 1 | 2.6 |
| <i>CDH3</i>     | 1 | 1 | 2.6 |
| <i>CDH4</i>     | 1 | 1 | 2.6 |
| <i>CDH8</i>     | 1 | 1 | 2.6 |
| <i>CDHR1</i>    | 1 | 1 | 2.6 |
| <i>CDK13</i>    | 1 | 1 | 2.6 |
| <i>CDK9</i>     | 1 | 1 | 2.6 |
| <i>CEACAM20</i> | 2 | 1 | 2.6 |
| <i>CECR2</i>    | 1 | 1 | 2.6 |
| <i>CELF1</i>    | 1 | 1 | 2.6 |
| <i>CELF5</i>    | 1 | 1 | 2.6 |
| <i>CELF6</i>    | 1 | 1 | 2.6 |
| <i>CEP104</i>   | 1 | 1 | 2.6 |
| <i>CERS4</i>    | 1 | 1 | 2.6 |
| <i>CES1</i>     | 1 | 1 | 2.6 |
| <i>CFP</i>      | 1 | 1 | 2.6 |
| <i>CHD5</i>     | 1 | 1 | 2.6 |
| <i>CHN2</i>     | 1 | 1 | 2.6 |
| <i>CHRD</i>     | 1 | 1 | 2.6 |
| <i>CHRNA1</i>   | 1 | 1 | 2.6 |
| <i>CHRN2</i>    | 1 | 1 | 2.6 |
| <i>CHRNA1</i>   | 1 | 1 | 2.6 |
| <i>CHRNA2</i>   | 1 | 1 | 2.6 |
| <i>CHRNA3</i>   | 1 | 1 | 2.6 |
| <i>CHRNA4</i>   | 1 | 1 | 2.6 |
| <i>CHRNA5</i>   | 1 | 1 | 2.6 |
| <i>CHRNA6</i>   | 1 | 1 | 2.6 |
| <i>CHRNA7</i>   | 1 | 1 | 2.6 |
| <i>CHRNA8</i>   | 1 | 1 | 2.6 |
| <i>CHRNA9</i>   | 1 | 1 | 2.6 |
| <i>CHRNA10</i>  | 1 | 1 | 2.6 |
| <i>CHRNA11</i>  | 1 | 1 | 2.6 |
| <i>CHRNA12</i>  | 1 | 1 | 2.6 |
| <i>CHRNA13</i>  | 1 | 1 | 2.6 |
| <i>CHRNA14</i>  | 1 | 1 | 2.6 |
| <i>CHRNA15</i>  | 1 | 1 | 2.6 |
| <i>CHRNA16</i>  | 1 | 1 | 2.6 |
| <i>CHRNA17</i>  | 1 | 1 | 2.6 |
| <i>CHRNA18</i>  | 1 | 1 | 2.6 |
| <i>CHRNA19</i>  | 1 | 1 | 2.6 |
| <i>CHRNA20</i>  | 1 | 1 | 2.6 |
| <i>CHRNA21</i>  | 1 | 1 | 2.6 |
| <i>CHRNA22</i>  | 1 | 1 | 2.6 |
| <i>CHRNA23</i>  | 1 | 1 | 2.6 |
| <i>CHRNA24</i>  | 1 | 1 | 2.6 |
| <i>CHRNA25</i>  | 1 | 1 | 2.6 |
| <i>CHRNA26</i>  | 1 | 1 | 2.6 |
| <i>CHRNA27</i>  | 1 | 1 | 2.6 |
| <i>CHRNA28</i>  | 1 | 1 | 2.6 |
| <i>CHRNA29</i>  | 1 | 1 | 2.6 |
| <i>CHRNA30</i>  | 1 | 1 | 2.6 |
| <i>CHRNA31</i>  | 1 | 1 | 2.6 |
| <i>CHRNA32</i>  | 1 | 1 | 2.6 |
| <i>CHRNA33</i>  | 1 | 1 | 2.6 |
| <i>CHRNA34</i>  | 1 | 1 | 2.6 |
| <i>CHRNA35</i>  | 1 | 1 | 2.6 |
| <i>CHRNA36</i>  | 1 | 1 | 2.6 |
| <i>CHRNA37</i>  | 1 | 1 | 2.6 |
| <i>CHRNA38</i>  | 1 | 1 | 2.6 |
| <i>CHRNA39</i>  | 1 | 1 | 2.6 |
| <i>CHRNA40</i>  | 1 | 1 | 2.6 |
| <i>CHRNA41</i>  | 1 | 1 | 2.6 |
| <i>CHRNA42</i>  | 1 | 1 | 2.6 |
| <i>CHRNA43</i>  | 1 | 1 | 2.6 |
| <i>CHRNA44</i>  | 1 | 1 | 2.6 |
| <i>CHRNA45</i>  | 1 | 1 | 2.6 |
| <i>CHRNA46</i>  | 1 | 1 | 2.6 |
| <i>CHRNA47</i>  | 1 | 1 | 2.6 |
| <i>CHRNA48</i>  | 1 | 1 | 2.6 |
| <i>CHRNA49</i>  | 1 | 1 | 2.6 |
| <i>CHRNA50</i>  | 1 | 1 | 2.6 |
| <i>CHRNA51</i>  | 1 | 1 | 2.6 |
| <i>CHRNA52</i>  | 1 | 1 | 2.6 |
| <i>CHRNA53</i>  | 1 | 1 | 2.6 |
| <i>CHRNA54</i>  | 1 | 1 | 2.6 |
| <i>CHRNA55</i>  | 1 | 1 | 2.6 |
| <i>CHRNA56</i>  | 1 | 1 | 2.6 |
| <i>CHRNA57</i>  | 1 | 1 | 2.6 |
| <i>CHRNA58</i>  | 1 | 1 | 2.6 |
| <i>CHRNA59</i>  | 1 | 1 | 2.6 |
| <i>CHRNA60</i>  | 1 | 1 | 2.6 |
| <i>CHRNA61</i>  | 1 | 1 | 2.6 |
| <i>CHRNA62</i>  | 1 | 1 | 2.6 |
| <i>CHRNA63</i>  | 1 | 1 | 2.6 |
| <i>CHRNA64</i>  | 1 | 1 | 2.6 |
| <i>CHRNA65</i>  | 1 | 1 | 2.6 |
| <i>CHRNA66</i>  | 1 | 1 | 2.6 |
| <i>CHRNA67</i>  | 1 | 1 | 2.6 |
| <i>CHRNA68</i>  | 1 | 1 | 2.6 |
| <i>CHRNA69</i>  | 1 | 1 | 2.6 |
| <i>CHRNA70</i>  | 1 | 1 | 2.6 |
| <i>CHRNA71</i>  | 1 | 1 | 2.6 |
| <i>CHRNA72</i>  | 1 | 1 | 2.6 |
| <i>CHRNA73</i>  | 1 | 1 | 2.6 |
| <i>CHRNA74</i>  | 1 | 1 | 2.6 |
| <i>CHRNA75</i>  | 1 | 1 | 2.6 |
| <i>CHRNA76</i>  | 1 | 1 | 2.6 |
| <i>CHRNA77</i>  | 1 | 1 | 2.6 |
| <i>CHRNA78</i>  | 1 | 1 | 2.6 |
| <i>CHRNA79</i>  | 1 | 1 | 2.6 |
| <i>CHRNA80</i>  | 1 | 1 | 2.6 |
| <i>CHRNA81</i>  | 1 | 1 | 2.6 |
| <i>CHRNA82</i>  | 1 | 1 | 2.6 |
| <i>CHRNA83</i>  | 1 | 1 | 2.6 |
| <i>CHRNA84</i>  | 1 | 1 | 2.6 |
| <i>CHRNA85</i>  | 1 | 1 | 2.6 |
| <i>CHRNA86</i>  | 1 | 1 | 2.6 |
| <i>CHRNA87</i>  | 1 | 1 | 2.6 |
| <i>CHRNA88</i>  | 1 | 1 | 2.6 |
| <i>CHRNA89</i>  | 1 | 1 | 2.6 |
| <i>CHRNA90</i>  | 1 | 1 | 2.6 |
| <i>CHRNA91</i>  | 1 | 1 | 2.6 |
| <i>CHRNA92</i>  | 1 | 1 | 2.6 |
| <i>CHRNA93</i>  | 1 | 1 | 2.6 |
| <i>CHRNA94</i>  | 1 | 1 | 2.6 |
| <i>CHRNA95</i>  | 1 | 1 | 2.6 |
| <i>CHRNA96</i>  | 1 | 1 | 2.6 |
| <i>CHRNA97</i>  | 1 | 1 | 2.6 |
| <i>CHRNA98</i>  | 1 | 1 | 2.6 |
| <i>CHRNA99</i>  | 1 | 1 | 2.6 |
| <i>CHRNA100</i> | 1 | 1 | 2.6 |

|                       |   |   |     |
|-----------------------|---|---|-----|
| <i>CSMD3</i>          | 1 | 1 | 2.6 |
| <i>CSNK1A1L</i>       | 1 | 1 | 2.6 |
| <i>CSNK1G2-AS1</i>    | 1 | 1 | 2.6 |
| <i>CTD-2611O12.2</i>  | 1 | 1 | 2.6 |
| <i>CTNND1</i>         | 1 | 1 | 2.6 |
| <i>CTSD</i>           | 1 | 1 | 2.6 |
| <i>CTSK</i>           | 1 | 1 | 2.6 |
| <i>CUL1</i>           | 1 | 1 | 2.6 |
| <i>CWF19L2</i>        | 1 | 1 | 2.6 |
| <i>CYP1A1</i>         | 1 | 1 | 2.6 |
| <i>CYP21A2</i>        | 1 | 1 | 2.6 |
| <i>CYP26B1</i>        | 1 | 1 | 2.6 |
| <i>CYP46A1</i>        | 1 | 1 | 2.6 |
| <i>DAB1</i>           | 1 | 1 | 2.6 |
| <i>DCAF12L2</i>       | 1 | 1 | 2.6 |
| <i>DCAF13</i>         | 1 | 1 | 2.6 |
| <i>DCC</i>            | 1 | 1 | 2.6 |
| <i>DCLK2</i>          | 1 | 1 | 2.6 |
| <i>DCSTAMP</i>        | 1 | 1 | 2.6 |
| <i>DDX17</i>          | 1 | 1 | 2.6 |
| <i>DDX41</i>          | 1 | 1 | 2.6 |
| <i>DDX42</i>          | 1 | 1 | 2.6 |
| <i>DDX52</i>          | 1 | 1 | 2.6 |
| <i>DDX60L</i>         | 1 | 1 | 2.6 |
| <i>DENND3</i>         | 1 | 1 | 2.6 |
| <i>DGKD</i>           | 1 | 1 | 2.6 |
| <i>DGKK</i>           | 1 | 1 | 2.6 |
| <i>DHX57</i>          | 1 | 1 | 2.6 |
| <i>DIDO1</i>          | 1 | 1 | 2.6 |
| <i>DKFZP686J19100</i> | 1 | 1 | 2.6 |
| <i>DKFZP779J2370</i>  | 1 | 1 | 2.6 |
| <i>DLC1</i>           | 1 | 1 | 2.6 |
| <i>DLGAP3</i>         | 1 | 1 | 2.6 |
| <i>DMBT1</i>          | 1 | 1 | 2.6 |
| <i>DNAH10</i>         | 1 | 1 | 2.6 |
| <i>DNAH11</i>         | 1 | 1 | 2.6 |
| <i>DNAH5</i>          | 1 | 1 | 2.6 |
| <i>DNAH6</i>          | 1 | 1 | 2.6 |
| <i>DNAH9</i>          | 1 | 1 | 2.6 |
| <i>DNAJC10</i>        | 1 | 1 | 2.6 |
| <i>DNAJC17</i>        | 1 | 1 | 2.6 |
| <i>DNHD1</i>          | 1 | 1 | 2.6 |
| <i>DNMT3L</i>         | 1 | 1 | 2.6 |
| <i>DOK3</i>           | 1 | 1 | 2.6 |
| <i>DOT1L</i>          | 1 | 1 | 2.6 |
| <i>DPP3</i>           | 1 | 1 | 2.6 |
| <i>DPP7</i>           | 1 | 1 | 2.6 |
| <i>DRD1</i>           | 1 | 1 | 2.6 |
| <i>DUSP16</i>         | 1 | 1 | 2.6 |
| <i>DVL1</i>           | 1 | 1 | 2.6 |
| <i>DVL3</i>           | 1 | 1 | 2.6 |
| <i>DYNC1L1I</i>       | 1 | 1 | 2.6 |
| <i>DYTN</i>           | 1 | 1 | 2.6 |
| <i>EBF1</i>           | 1 | 1 | 2.6 |

|                 |   |   |     |
|-----------------|---|---|-----|
| <i>EBNA1BP2</i> | 1 | 1 | 2.6 |
| <i>EFCAB13</i>  | 1 | 1 | 2.6 |
| <i>EFCAB7</i>   | 1 | 1 | 2.6 |
| <i>MICU3</i>    | 1 | 1 | 2.6 |
| <i>EHBP1</i>    | 1 | 1 | 2.6 |
| <i>EI24</i>     | 2 | 1 | 2.6 |
| <i>EIF2AK3</i>  | 1 | 1 | 2.6 |
| <i>EIF2B2</i>   | 1 | 1 | 2.6 |
| <i>AGO2</i>     | 1 | 1 | 2.6 |
| <i>EIF2S3L</i>  | 1 | 1 | 2.6 |
| <i>EIF3A</i>    | 1 | 1 | 2.6 |
| <i>ELF4</i>     | 1 | 1 | 2.6 |
| <i>ELMO2</i>    | 1 | 1 | 2.6 |
| <i>EP400</i>    | 1 | 1 | 2.6 |
| <i>EPB41L4B</i> | 1 | 1 | 2.6 |
| <i>EPHA6</i>    | 1 | 1 | 2.6 |
| <i>EPHA8</i>    | 1 | 1 | 2.6 |
| <i>EPHB1</i>    | 1 | 1 | 2.6 |
| <i>EPHB4</i>    | 1 | 1 | 2.6 |
| <i>EPS8</i>     | 1 | 1 | 2.6 |
| <i>EPT1</i>     | 1 | 1 | 2.6 |
| <i>ERAP1</i>    | 2 | 1 | 2.6 |
| <i>ERF</i>      | 1 | 1 | 2.6 |
| <i>ERLIN1</i>   | 1 | 1 | 2.6 |
| <i>ESPNL</i>    | 1 | 1 | 2.6 |
| <i>EVC</i>      | 1 | 1 | 2.6 |
| <i>EXOC3L1</i>  | 1 | 1 | 2.6 |
| <i>EXOC6</i>    | 1 | 1 | 2.6 |
| <i>EXOC8</i>    | 1 | 1 | 2.6 |
| <i>EXOSC9</i>   | 1 | 1 | 2.6 |
| <i>EYS</i>      | 1 | 1 | 2.6 |
| <i>F2</i>       | 1 | 1 | 2.6 |
| <i>F7</i>       | 1 | 1 | 2.6 |
| <i>FAM109A</i>  | 1 | 1 | 2.6 |
| <i>FAM111B</i>  | 1 | 1 | 2.6 |
| <i>FAM117B</i>  | 1 | 1 | 2.6 |
| <i>FAM122A</i>  | 1 | 1 | 2.6 |
| <i>FAM135A</i>  | 1 | 1 | 2.6 |
| <i>FAM171B</i>  | 1 | 1 | 2.6 |
| <i>FAM19A4</i>  | 1 | 1 | 2.6 |
| <i>FAM205BP</i> | 1 | 1 | 2.6 |
| <i>FAM209B</i>  | 1 | 1 | 2.6 |
| <i>FAM46A</i>   | 1 | 1 | 2.6 |
| <i>BRINP3</i>   | 1 | 1 | 2.6 |
| <i>FAM63B</i>   | 1 | 1 | 2.6 |
| <i>FAT1</i>     | 1 | 1 | 2.6 |
| <i>FAT4</i>     | 1 | 1 | 2.6 |
| <i>FBLL1</i>    | 1 | 1 | 2.6 |
| <i>FBLN1</i>    | 1 | 1 | 2.6 |
| <i>FBN1</i>     | 1 | 1 | 2.6 |
| <i>FBXL13</i>   | 1 | 1 | 2.6 |
| <i>FBXO21</i>   | 1 | 1 | 2.6 |
| <i>FBXO46</i>   | 1 | 1 | 2.6 |
| <i>FCRL4</i>    | 1 | 1 | 2.6 |

|                 |   |   |     |
|-----------------|---|---|-----|
| <i>FCRL5</i>    | 2 | 1 | 2.6 |
| <i>FEM1C</i>    | 1 | 1 | 2.6 |
| <i>FFAR1</i>    | 1 | 1 | 2.6 |
| <i>FGD1</i>     | 1 | 1 | 2.6 |
| <i>FGF5</i>     | 1 | 1 | 2.6 |
| <i>FGFR2</i>    | 1 | 1 | 2.6 |
| <i>FGL1</i>     | 1 | 1 | 2.6 |
| <i>FKRP</i>     | 1 | 1 | 2.6 |
| <i>FLCN</i>     | 1 | 1 | 2.6 |
| <i>FLNC</i>     | 1 | 1 | 2.6 |
| <i>FLT1</i>     | 1 | 1 | 2.6 |
| <i>FLT4</i>     | 3 | 1 | 2.6 |
| <i>FLVCR1</i>   | 1 | 1 | 2.6 |
| <i>FMO3</i>     | 1 | 1 | 2.6 |
| <i>FOXB2</i>    | 1 | 1 | 2.6 |
| <i>FREM3</i>    | 1 | 1 | 2.6 |
| <i>FSCN1</i>    | 1 | 1 | 2.6 |
| <i>FSHR</i>     | 1 | 1 | 2.6 |
| <i>FUBP1</i>    | 1 | 1 | 2.6 |
| <i>FUT7</i>     | 1 | 1 | 2.6 |
| <i>GABBR1</i>   | 1 | 1 | 2.6 |
| <i>GABRA6</i>   | 1 | 1 | 2.6 |
| <i>GABRB3</i>   | 1 | 1 | 2.6 |
| <i>GAD2</i>     | 1 | 1 | 2.6 |
| <i>GAL3ST3</i>  | 1 | 1 | 2.6 |
| <i>GALNT10</i>  | 1 | 1 | 2.6 |
| <i>GALNT14</i>  | 1 | 1 | 2.6 |
| <i>GALNT16</i>  | 1 | 1 | 2.6 |
| <i>GAMT</i>     | 1 | 1 | 2.6 |
| <i>GANC</i>     | 1 | 1 | 2.6 |
| <i>GAS2</i>     | 1 | 1 | 2.6 |
| <i>GBAP1</i>    | 1 | 1 | 2.6 |
| <i>GEMIN5</i>   | 1 | 1 | 2.6 |
| <i>GFMI</i>     | 1 | 1 | 2.6 |
| <i>GGN</i>      | 1 | 1 | 2.6 |
| <i>GIPC1</i>    | 1 | 1 | 2.6 |
| <i>GIPR</i>     | 1 | 1 | 2.6 |
| <i>GJA3</i>     | 1 | 1 | 2.6 |
| <i>GJA9</i>     | 1 | 1 | 2.6 |
| <i>GKNI</i>     | 1 | 1 | 2.6 |
| <i>GLS</i>      | 1 | 1 | 2.6 |
| <i>GMIP</i>     | 1 | 1 | 2.6 |
| <i>GNB2</i>     | 1 | 1 | 2.6 |
| <i>GOLGA4</i>   | 1 | 1 | 2.6 |
| <i>GOLGA6L2</i> | 1 | 1 | 2.6 |
| <i>GPAT2</i>    | 1 | 1 | 2.6 |
| <i>GPC4</i>     | 1 | 1 | 2.6 |
| <i>GPC5</i>     | 1 | 1 | 2.6 |
| <i>GPCPD1</i>   | 1 | 1 | 2.6 |
| <i>GPM6B</i>    | 1 | 1 | 2.6 |
| <i>ADGRG4</i>   | 1 | 1 | 2.6 |
| <i>ADGRA3</i>   | 1 | 1 | 2.6 |
| <i>ADGRD1</i>   | 1 | 1 | 2.6 |
| <i>GPR142</i>   | 1 | 1 | 2.6 |



|                 |   |   |     |
|-----------------|---|---|-----|
| <i>GPR156</i>   | 1 | 1 | 2.6 |
| <i>GPR32</i>    | 1 | 1 | 2.6 |
| <i>GPR39</i>    | 1 | 1 | 2.6 |
| <i>GPR50</i>    | 1 | 1 | 2.6 |
| <i>ADGRV1</i>   | 1 | 1 | 2.6 |
| <i>GPRASP2</i>  | 1 | 1 | 2.6 |
| <i>GRAMD1B</i>  | 1 | 1 | 2.6 |
| <i>GRB10</i>    | 1 | 1 | 2.6 |
| <i>GRB14</i>    | 1 | 1 | 2.6 |
| <i>GRIA2</i>    | 1 | 1 | 2.6 |
| <i>GRIA3</i>    | 1 | 1 | 2.6 |
| <i>GRID1</i>    | 1 | 1 | 2.6 |
| <i>GRID2IP</i>  | 1 | 1 | 2.6 |
| <i>GRIK4</i>    | 1 | 1 | 2.6 |
| <i>GRIPAP1</i>  | 1 | 1 | 2.6 |
| <i>GRK1</i>     | 1 | 1 | 2.6 |
| <i>GRK7</i>     | 1 | 1 | 2.6 |
| <i>GRM5</i>     | 1 | 1 | 2.6 |
| <i>GSDMB</i>    | 1 | 1 | 2.6 |
| <i>GTF3C1</i>   | 1 | 1 | 2.6 |
| <i>GYS1</i>     | 1 | 1 | 2.6 |
| <i>GYS2</i>     | 1 | 1 | 2.6 |
| <i>H2AFY2</i>   | 1 | 1 | 2.6 |
| <i>HACL1</i>    | 1 | 1 | 2.6 |
| <i>HAPLN1</i>   | 1 | 1 | 2.6 |
| <i>HAT1</i>     | 1 | 1 | 2.6 |
| <i>HBB</i>      | 1 | 1 | 2.6 |
| <i>HBP1</i>     | 1 | 1 | 2.6 |
| <i>HDAC7</i>    | 1 | 1 | 2.6 |
| <i>HECTD1</i>   | 1 | 1 | 2.6 |
| <i>HEPACAM</i>  | 1 | 1 | 2.6 |
| <i>HEPN1</i>    | 1 | 1 | 2.6 |
| <i>HERC1</i>    | 1 | 1 | 2.6 |
| <i>HERC2</i>    | 1 | 1 | 2.6 |
| <i>HFM1</i>     | 1 | 1 | 2.6 |
| <i>HGS</i>      | 1 | 1 | 2.6 |
| <i>HIAT1</i>    | 1 | 1 | 2.6 |
| <i>HIGD2B</i>   | 1 | 1 | 2.6 |
| <i>HIP1R</i>    | 1 | 1 | 2.6 |
| <i>HIRA</i>     | 1 | 1 | 2.6 |
| <i>HIST1H4B</i> | 1 | 1 | 2.6 |
| <i>HIVEP3</i>   | 1 | 1 | 2.6 |
| <i>HK2</i>      | 1 | 1 | 2.6 |
| <i>HMCN1</i>    | 1 | 1 | 2.6 |
| <i>HMCN2</i>    | 1 | 1 | 2.6 |
| <i>HNRNPM</i>   | 1 | 1 | 2.6 |
| <i>HRNR</i>     | 1 | 1 | 2.6 |
| <i>HSCB</i>     | 1 | 1 | 2.6 |
| <i>HSD17B2</i>  | 1 | 1 | 2.6 |
| <i>HSD17B3</i>  | 1 | 1 | 2.6 |
| <i>HSF4</i>     | 1 | 1 | 2.6 |
| <i>HSH2D</i>    | 1 | 1 | 2.6 |
| <i>HSPA1L</i>   | 1 | 1 | 2.6 |
| <i>HSPA6</i>    | 1 | 1 | 2.6 |

|                 |   |   |     |
|-----------------|---|---|-----|
| <i>HSPA9</i>    | 1 | 1 | 2.6 |
| <i>HSPG2</i>    | 1 | 1 | 2.6 |
| <i>HTR7</i>     | 1 | 1 | 2.6 |
| <i>HTR7P1</i>   | 1 | 1 | 2.6 |
| <i>HYDIN</i>    | 1 | 1 | 2.6 |
| <i>HYOU1</i>    | 1 | 1 | 2.6 |
| <i>IAH1</i>     | 1 | 1 | 2.6 |
| <i>IARS</i>     | 1 | 1 | 2.6 |
| <i>IGDCC3</i>   | 1 | 1 | 2.6 |
| <i>IGHA1</i>    | 1 | 1 | 2.6 |
| <i>IGLV3-27</i> | 1 | 1 | 2.6 |
| <i>IGSF1</i>    | 1 | 1 | 2.6 |
| <i>IGSF10</i>   | 1 | 1 | 2.6 |
| <i>IGSF9B</i>   | 1 | 1 | 2.6 |
| <i>IL13RA2</i>  | 1 | 1 | 2.6 |
| <i>IL17B</i>    | 1 | 1 | 2.6 |
| <i>ILDR1</i>    | 1 | 1 | 2.6 |
| <i>ILF3</i>     | 1 | 1 | 2.6 |
| <i>INO80</i>    | 1 | 1 | 2.6 |
| <i>INTS12</i>   | 1 | 1 | 2.6 |
| <i>IQCE</i>     | 1 | 1 | 2.6 |
| <i>IQCF6</i>    | 1 | 1 | 2.6 |
| <i>IQCH</i>     | 1 | 1 | 2.6 |
| <i>IRAK1</i>    | 1 | 1 | 2.6 |
| <i>IREB2</i>    | 1 | 1 | 2.6 |
| <i>IRS1</i>     | 1 | 1 | 2.6 |
| <i>IRX6</i>     | 1 | 1 | 2.6 |
| <i>ISLR</i>     | 1 | 1 | 2.6 |
| <i>ISX</i>      | 1 | 1 | 2.6 |
| <i>ITGA7</i>    | 1 | 1 | 2.6 |
| <i>ITGAX</i>    | 1 | 1 | 2.6 |
| <i>ITIH5</i>    | 1 | 1 | 2.6 |
| <i>ITPR3</i>    | 1 | 1 | 2.6 |
| <i>ITSN1</i>    | 1 | 1 | 2.6 |
| <i>IVL</i>      | 1 | 1 | 2.6 |
| <i>JAM2</i>     | 1 | 1 | 2.6 |
| <i>JPH4</i>     | 1 | 1 | 2.6 |
| <i>JUNB</i>     | 1 | 1 | 2.6 |
| <i>KCNA5</i>    | 1 | 1 | 2.6 |
| <i>KCNA7</i>    | 1 | 1 | 2.6 |
| <i>KCNE5</i>    | 1 | 1 | 2.6 |
| <i>KCNG1</i>    | 1 | 1 | 2.6 |
| <i>KCNG2</i>    | 1 | 1 | 2.6 |
| <i>KCNG3</i>    | 1 | 1 | 2.6 |
| <i>KCNH1</i>    | 1 | 1 | 2.6 |
| <i>KCNK15</i>   | 1 | 1 | 2.6 |
| <i>KCNK16</i>   | 1 | 1 | 2.6 |
| <i>KCNK18</i>   | 1 | 1 | 2.6 |
| <i>KCNMB3</i>   | 1 | 1 | 2.6 |
| <i>KCNN2</i>    | 1 | 1 | 2.6 |
| <i>KCNQ2</i>    | 1 | 1 | 2.6 |
| <i>KCNV2</i>    | 1 | 1 | 2.6 |
| <i>KCTD6</i>    | 1 | 1 | 2.6 |
| <i>KDM3A</i>    | 1 | 1 | 2.6 |

|                  |   |   |     |
|------------------|---|---|-----|
| <i>KDM4C</i>     | 1 | 1 | 2.6 |
| <i>KIAA0556</i>  | 1 | 1 | 2.6 |
| <i>ICE1</i>      | 1 | 1 | 2.6 |
| <i>KIAA1211L</i> | 1 | 1 | 2.6 |
| <i>ARFGEF3</i>   | 1 | 1 | 2.6 |
| <i>KIAA1407</i>  | 1 | 1 | 2.6 |
| <i>KIAA1462</i>  | 1 | 1 | 2.6 |
| <i>KIAA1524</i>  | 1 | 1 | 2.6 |
| <i>KIAA1671</i>  | 1 | 1 | 2.6 |
| <i>KIAA1755</i>  | 1 | 1 | 2.6 |
| <i>CCAR2</i>     | 1 | 1 | 2.6 |
| <i>KIF13A</i>    | 1 | 1 | 2.6 |
| <i>KIF1B</i>     | 1 | 1 | 2.6 |
| <i>KIF26A</i>    | 1 | 1 | 2.6 |
| <i>KL</i>        | 1 | 1 | 2.6 |
| <i>KLF17</i>     | 1 | 1 | 2.6 |
| <i>KLHDC7A</i>   | 1 | 1 | 2.6 |
| <i>KLHL2</i>     | 1 | 1 | 2.6 |
| <i>KLRF1</i>     | 3 | 1 | 2.6 |
| <i>KNDC1</i>     | 1 | 1 | 2.6 |
| <i>KNTC1</i>     | 1 | 1 | 2.6 |
| <i>KRT2</i>      | 1 | 1 | 2.6 |
| <i>KRT24</i>     | 1 | 1 | 2.6 |
| <i>KRT84</i>     | 1 | 1 | 2.6 |
| <i>KRTAP24-1</i> | 1 | 1 | 2.6 |
| <i>KRTAP3-2</i>  | 1 | 1 | 2.6 |
| <i>KY</i>        | 1 | 1 | 2.6 |
| <i>LAMA1</i>     | 1 | 1 | 2.6 |
| <i>LAMA3</i>     | 1 | 1 | 2.6 |
| <i>LAMA5</i>     | 1 | 1 | 2.6 |
| <i>LAMC1</i>     | 1 | 1 | 2.6 |
| <i>LARP7</i>     | 1 | 1 | 2.6 |
| <i>LASIL</i>     | 1 | 1 | 2.6 |
| <i>LEMD3</i>     | 1 | 1 | 2.6 |
| <i>P3H3</i>      | 1 | 1 | 2.6 |
| <i>LHX5</i>      | 1 | 1 | 2.6 |
| <i>LIMK1</i>     | 1 | 1 | 2.6 |
| <i>LIN7A</i>     | 1 | 1 | 2.6 |
| <i>LINC00521</i> | 1 | 1 | 2.6 |
| <i>LIPE</i>      | 1 | 1 | 2.6 |
| <i>LIPF</i>      | 1 | 1 | 2.6 |
| <i>LIPH</i>      | 1 | 1 | 2.6 |
| <i>LIX1</i>      | 1 | 1 | 2.6 |
| <i>LMLN</i>      | 1 | 1 | 2.6 |
| <i>LMTK3</i>     | 1 | 1 | 2.6 |
| <i>LPA</i>       | 1 | 1 | 2.6 |
| <i>ADGRL1</i>    | 1 | 1 | 2.6 |
| <i>LPIN3</i>     | 1 | 1 | 2.6 |
| <i>LRP6</i>      | 1 | 1 | 2.6 |
| <i>LRRC24</i>    | 1 | 1 | 2.6 |
| <i>NRROS</i>     | 1 | 1 | 2.6 |
| <i>LRRC55</i>    | 1 | 1 | 2.6 |
| <i>LRRC71</i>    | 1 | 1 | 2.6 |
| <i>LRRIQ1</i>    | 1 | 1 | 2.6 |

|                 |   |   |     |
|-----------------|---|---|-----|
| <i>LRRK2</i>    | 1 | 1 | 2.6 |
| <i>LRRTM1</i>   | 1 | 1 | 2.6 |
| <i>LRRTM3</i>   | 1 | 1 | 2.6 |
| <i>LSM12</i>    | 1 | 1 | 2.6 |
| <i>LTBP1</i>    | 1 | 1 | 2.6 |
| <i>LTBP3</i>    | 1 | 1 | 2.6 |
| <i>LTF</i>      | 1 | 1 | 2.6 |
| <i>LYNX1</i>    | 1 | 1 | 2.6 |
| <i>MAGEB10</i>  | 1 | 1 | 2.6 |
| <i>MAGEB17</i>  | 1 | 1 | 2.6 |
| <i>MAGEB18</i>  | 1 | 1 | 2.6 |
| <i>MAML2</i>    | 1 | 1 | 2.6 |
| <i>MAN2A1</i>   | 1 | 1 | 2.6 |
| <i>MAP1S</i>    | 1 | 1 | 2.6 |
| <i>MAP2K4</i>   | 1 | 1 | 2.6 |
| <i>MAPK15</i>   | 1 | 1 | 2.6 |
| <i>MAPK8</i>    | 1 | 1 | 2.6 |
| <i>MATN4</i>    | 1 | 1 | 2.6 |
| <i>MBD5</i>     | 1 | 1 | 2.6 |
| <i>MBLAC2</i>   | 1 | 1 | 2.6 |
| <i>MCF2L2</i>   | 1 | 1 | 2.6 |
| <i>MCTP1</i>    | 1 | 1 | 2.6 |
| <i>MDN1</i>     | 1 | 1 | 2.6 |
| <i>MED27</i>    | 1 | 1 | 2.6 |
| <i>MEGF10</i>   | 1 | 1 | 2.6 |
| <i>MGA</i>      | 1 | 1 | 2.6 |
| <i>MGAT4A</i>   | 1 | 1 | 2.6 |
| <i>MGAT5</i>    | 1 | 1 | 2.6 |
| <i>MICALL1</i>  | 1 | 1 | 2.6 |
| <i>MIR223</i>   | 1 | 1 | 2.6 |
| <i>MIR525</i>   | 1 | 1 | 2.6 |
| <i>MIR936</i>   | 1 | 1 | 2.6 |
| <i>MIRLET7E</i> | 1 | 1 | 2.6 |
| <i>KMT2D</i>    | 1 | 1 | 2.6 |
| <i>MMP2</i>     | 1 | 1 | 2.6 |
| <i>MMP27</i>    | 1 | 1 | 2.6 |
| <i>MOGAT1</i>   | 1 | 1 | 2.6 |
| <i>MOV10L1</i>  | 1 | 1 | 2.6 |
| <i>MPC2</i>     | 1 | 1 | 2.6 |
| <i>MPHOSPH9</i> | 1 | 1 | 2.6 |
| <i>MRE11A</i>   | 1 | 1 | 2.6 |
| <i>MROH6</i>    | 1 | 1 | 2.6 |
| <i>MRPL30</i>   | 1 | 1 | 2.6 |
| <i>MRPS31</i>   | 1 | 1 | 2.6 |
| <i>MRPS5</i>    | 1 | 1 | 2.6 |
| <i>MS4A14</i>   | 1 | 1 | 2.6 |
| <i>MTMR12</i>   | 1 | 1 | 2.6 |
| <i>MTSS1</i>    | 1 | 1 | 2.6 |
| <i>MUC19</i>    | 1 | 1 | 2.6 |
| <i>MUC20</i>    | 1 | 1 | 2.6 |
| <i>MVP</i>      | 1 | 1 | 2.6 |
| <i>MYCBP2</i>   | 1 | 1 | 2.6 |
| <i>MYH11</i>    | 1 | 1 | 2.6 |
| <i>MYH13</i>    | 1 | 1 | 2.6 |

|                |   |   |     |
|----------------|---|---|-----|
| <i>MYH8</i>    | 1 | 1 | 2.6 |
| <i>MYL1</i>    | 1 | 1 | 2.6 |
| <i>MYO18A</i>  | 1 | 1 | 2.6 |
| <i>MYO1F</i>   | 1 | 1 | 2.6 |
| <i>MYO3A</i>   | 1 | 1 | 2.6 |
| <i>MYO5C</i>   | 1 | 1 | 2.6 |
| <i>MYO9B</i>   | 1 | 1 | 2.6 |
| <i>MYRIP</i>   | 1 | 1 | 2.6 |
| <i>NAA15</i>   | 1 | 1 | 2.6 |
| <i>NADK</i>    | 1 | 1 | 2.6 |
| <i>NAGA</i>    | 1 | 1 | 2.6 |
| <i>NALCN</i>   | 1 | 1 | 2.6 |
| <i>NAPSA</i>   | 1 | 1 | 2.6 |
| <i>ICE2</i>    | 1 | 1 | 2.6 |
| <i>NAV2</i>    | 1 | 1 | 2.6 |
| <i>NBEAL2</i>  | 1 | 1 | 2.6 |
| <i>NCAMI</i>   | 1 | 1 | 2.6 |
| <i>NCAM2</i>   | 1 | 1 | 2.6 |
| <i>NCK1</i>    | 1 | 1 | 2.6 |
| <i>NCMAP</i>   | 1 | 1 | 2.6 |
| <i>NDN</i>     | 1 | 1 | 2.6 |
| <i>NDNF</i>    | 1 | 1 | 2.6 |
| <i>NDST1</i>   | 1 | 1 | 2.6 |
| <i>NDUFAF3</i> | 1 | 1 | 2.6 |
| <i>NDUFB4</i>  | 1 | 1 | 2.6 |
| <i>NEMF</i>    | 1 | 1 | 2.6 |
| <i>NFKBIZ</i>  | 1 | 1 | 2.6 |
| <i>NFXL1</i>   | 1 | 1 | 2.6 |
| <i>NKX6-3</i>  | 1 | 1 | 2.6 |
| <i>NLRP12</i>  | 1 | 1 | 2.6 |
| <i>NLRP4</i>   | 1 | 1 | 2.6 |
| <i>NNT</i>     | 1 | 1 | 2.6 |
| <i>NOA1</i>    | 1 | 1 | 2.6 |
| <i>NOL11</i>   | 1 | 1 | 2.6 |
| <i>NOL4</i>    | 1 | 1 | 2.6 |
| <i>NOX1</i>    | 1 | 1 | 2.6 |
| <i>NPAP1</i>   | 1 | 1 | 2.6 |
| <i>NPFFR2</i>  | 1 | 1 | 2.6 |
| <i>NPL</i>     | 1 | 1 | 2.6 |
| <i>NPLOC4</i>  | 1 | 1 | 2.6 |
| <i>NR1H2</i>   | 1 | 1 | 2.6 |
| <i>NR5A2</i>   | 1 | 1 | 2.6 |
| <i>NRXN1</i>   | 1 | 1 | 2.6 |
| <i>NT5C1B</i>  | 1 | 1 | 2.6 |
| <i>NT5E</i>    | 1 | 1 | 2.6 |
| <i>NTNG1</i>   | 1 | 1 | 2.6 |
| <i>NUDT17</i>  | 1 | 1 | 2.6 |
| <i>NXNL1</i>   | 1 | 1 | 2.6 |
| <i>OBSL1</i>   | 1 | 1 | 2.6 |
| <i>OGDHL</i>   | 1 | 1 | 2.6 |
| <i>OPRK1</i>   | 1 | 1 | 2.6 |
| <i>OR10A2</i>  | 1 | 1 | 2.6 |
| <i>OR10AD1</i> | 1 | 1 | 2.6 |
| <i>OR10C1</i>  | 1 | 1 | 2.6 |

|                |   |   |     |
|----------------|---|---|-----|
| <i>OR10S1</i>  | 2 | 1 | 2.6 |
| <i>OR14K1</i>  | 1 | 1 | 2.6 |
| <i>OR2C1</i>   | 1 | 1 | 2.6 |
| <i>OR2T2</i>   | 1 | 1 | 2.6 |
| <i>OR2T8</i>   | 1 | 1 | 2.6 |
| <i>OR2W1</i>   | 1 | 1 | 2.6 |
| <i>OR4M2</i>   | 1 | 1 | 2.6 |
| <i>OR4N2</i>   | 1 | 1 | 2.6 |
| <i>OR51Q1</i>  | 1 | 1 | 2.6 |
| <i>OR52A5</i>  | 1 | 1 | 2.6 |
| <i>OR5A1</i>   | 1 | 1 | 2.6 |
| <i>OR5D17P</i> | 1 | 1 | 2.6 |
| <i>OR8B2</i>   | 1 | 1 | 2.6 |
| <i>OSBP</i>    | 1 | 1 | 2.6 |
| <i>OSBPL6</i>  | 1 | 1 | 2.6 |
| <i>OXCT2</i>   | 1 | 1 | 2.6 |
| <i>P2RX2</i>   | 1 | 1 | 2.6 |
| <i>P2RY4</i>   | 1 | 1 | 2.6 |
| <i>P2RY6</i>   | 1 | 1 | 2.6 |
| <i>PABPC1</i>  | 1 | 1 | 2.6 |
| <i>PAIP1</i>   | 1 | 1 | 2.6 |
| <i>PAK4</i>    | 1 | 1 | 2.6 |
| <i>PAMR1</i>   | 1 | 1 | 2.6 |
| <i>PANX3</i>   | 1 | 1 | 2.6 |
| <i>PAPD4</i>   | 1 | 1 | 2.6 |
| <i>PAPPA</i>   | 1 | 1 | 2.6 |
| <i>PAQR8</i>   | 1 | 1 | 2.6 |
| <i>PARP2</i>   | 1 | 1 | 2.6 |
| <i>PAX1</i>    | 1 | 1 | 2.6 |
| <i>PAXBPI</i>  | 1 | 1 | 2.6 |
| <i>PBDC1</i>   | 1 | 1 | 2.6 |
| <i>PC</i>      | 1 | 1 | 2.6 |
| <i>PCCA</i>    | 1 | 1 | 2.6 |
| <i>PCDH11X</i> | 1 | 1 | 2.6 |
| <i>PCDH17</i>  | 1 | 1 | 2.6 |
| <i>PCDHA6</i>  | 1 | 1 | 2.6 |
| <i>PCDHB2</i>  | 1 | 1 | 2.6 |
| <i>PCDHGA2</i> | 1 | 1 | 2.6 |
| <i>PCDHGA5</i> | 1 | 1 | 2.6 |
| <i>PCDHGA6</i> | 1 | 1 | 2.6 |
| <i>PCDHGA8</i> | 1 | 1 | 2.6 |
| <i>PCDHGB1</i> | 1 | 1 | 2.6 |
| <i>PCNT</i>    | 1 | 1 | 2.6 |
| <i>PCSK4</i>   | 1 | 1 | 2.6 |
| <i>PDE10A</i>  | 1 | 1 | 2.6 |
| <i>PDE1B</i>   | 1 | 1 | 2.6 |
| <i>PDE3A</i>   | 1 | 1 | 2.6 |
| <i>PDE6B</i>   | 1 | 1 | 2.6 |
| <i>PDK3</i>    | 1 | 1 | 2.6 |
| <i>PDPN</i>    | 1 | 1 | 2.6 |
| <i>PDZRN4</i>  | 1 | 1 | 2.6 |
| <i>PENK</i>    | 1 | 1 | 2.6 |
| <i>PEX5L</i>   | 1 | 1 | 2.6 |
| <i>PHACTR4</i> | 1 | 1 | 2.6 |

|                 |   |   |     |
|-----------------|---|---|-----|
| <i>PHC1</i>     | 1 | 1 | 2.6 |
| <i>PHLPP2</i>   | 1 | 1 | 2.6 |
| <i>PHOSPHO2</i> | 1 | 1 | 2.6 |
| <i>PHYH</i>     | 3 | 1 | 2.6 |
| <i>PIBF1</i>    | 2 | 1 | 2.6 |
| <i>PIDD1</i>    | 1 | 1 | 2.6 |
| <i>PIGA</i>     | 1 | 1 | 2.6 |
| <i>PIGQ</i>     | 1 | 1 | 2.6 |
| <i>PIH1D1</i>   | 1 | 1 | 2.6 |
| <i>PIK3C2G</i>  | 1 | 1 | 2.6 |
| <i>PIK3CA</i>   | 1 | 1 | 2.6 |
| <i>PIK3R6</i>   | 1 | 1 | 2.6 |
| <i>PISD</i>     | 1 | 1 | 2.6 |
| <i>PIWIL4</i>   | 1 | 1 | 2.6 |
| <i>PJA2</i>     | 1 | 1 | 2.6 |
| <i>PKHD1</i>    | 1 | 1 | 2.6 |
| <i>PKM</i>      | 1 | 1 | 2.6 |
| <i>PKN1</i>     | 1 | 1 | 2.6 |
| <i>PLCD4</i>    | 1 | 1 | 2.6 |
| <i>PLCL1</i>    | 1 | 1 | 2.6 |
| <i>PLEKHA5</i>  | 1 | 1 | 2.6 |
| <i>PLEKHA6</i>  | 1 | 1 | 2.6 |
| <i>PLEKHG3</i>  | 1 | 1 | 2.6 |
| <i>PLEKHG4B</i> | 1 | 1 | 2.6 |
| <i>PLEKHG6</i>  | 1 | 1 | 2.6 |
| <i>PLOD2</i>    | 1 | 1 | 2.6 |
| <i>PLTP</i>     | 1 | 1 | 2.6 |
| <i>PLXNA4</i>   | 1 | 1 | 2.6 |
| <i>PLXNC1</i>   | 1 | 1 | 2.6 |
| <i>PNLIP</i>    | 1 | 1 | 2.6 |
| <i>PNPLA6</i>   | 1 | 1 | 2.6 |
| <i>PNPLA8</i>   | 2 | 1 | 2.6 |
| <i>POGZ</i>     | 1 | 1 | 2.6 |
| <i>POLR1A</i>   | 1 | 1 | 2.6 |
| <i>POLR2L</i>   | 1 | 1 | 2.6 |
| <i>POP4</i>     | 1 | 1 | 2.6 |
| <i>PPP1R14C</i> | 1 | 1 | 2.6 |
| <i>PPP1R32</i>  | 1 | 1 | 2.6 |
| <i>PPP2R2C</i>  | 1 | 1 | 2.6 |
| <i>PRAMI</i>    | 1 | 1 | 2.6 |
| <i>PRDM14</i>   | 1 | 1 | 2.6 |
| <i>PRDM7</i>    | 1 | 1 | 2.6 |
| <i>PRF1</i>     | 1 | 1 | 2.6 |
| <i>PRKAA1</i>   | 1 | 1 | 2.6 |
| <i>PRKCG</i>    | 1 | 1 | 2.6 |
| <i>PRKD2</i>    | 1 | 1 | 2.6 |
| <i>PRNP</i>     | 1 | 1 | 2.6 |
| <i>PROX2</i>    | 1 | 1 | 2.6 |
| <i>PRPF6</i>    | 1 | 1 | 2.6 |
| <i>PRPH</i>     | 1 | 1 | 2.6 |
| <i>PRR12</i>    | 1 | 1 | 2.6 |
| <i>PRRG4</i>    | 1 | 1 | 2.6 |
| <i>PRRT2</i>    | 1 | 1 | 2.6 |
| <i>PRSS35</i>   | 1 | 1 | 2.6 |

|                |   |   |     |
|----------------|---|---|-----|
| <i>PRSS38</i>  | 2 | 1 | 2.6 |
| <i>PRUNE2</i>  | 1 | 1 | 2.6 |
| <i>PSD3</i>    | 1 | 1 | 2.6 |
| <i>PSIP1</i>   | 1 | 1 | 2.6 |
| <i>PSTK</i>    | 1 | 1 | 2.6 |
| <i>PTCH1</i>   | 1 | 1 | 2.6 |
| <i>PTCHD2</i>  | 1 | 1 | 2.6 |
| <i>PTEN</i>    | 1 | 1 | 2.6 |
| <i>PTGDR</i>   | 1 | 1 | 2.6 |
| <i>PTGFRN</i>  | 1 | 1 | 2.6 |
| <i>PTH1R</i>   | 1 | 1 | 2.6 |
| <i>PTK7</i>    | 1 | 1 | 2.6 |
| <i>PTPN12</i>  | 1 | 1 | 2.6 |
| <i>PTPN14</i>  | 1 | 1 | 2.6 |
| <i>PTPRF</i>   | 1 | 1 | 2.6 |
| <i>PTPRS</i>   | 1 | 1 | 2.6 |
| <i>PUS7L</i>   | 1 | 1 | 2.6 |
| <i>PXDN</i>    | 1 | 1 | 2.6 |
| <i>PYGO1</i>   | 1 | 1 | 2.6 |
| <i>RAB37</i>   | 1 | 1 | 2.6 |
| <i>RAB5B</i>   | 1 | 1 | 2.6 |
| <i>RACGAP1</i> | 1 | 1 | 2.6 |
| <i>RAD23B</i>  | 1 | 1 | 2.6 |
| <i>RAD54L</i>  | 1 | 1 | 2.6 |
| <i>RADIL</i>   | 1 | 1 | 2.6 |
| <i>RAG1</i>    | 1 | 1 | 2.6 |
| <i>RASAL3</i>  | 1 | 1 | 2.6 |
| <i>RB1</i>     | 1 | 1 | 2.6 |
| <i>RB1CC1</i>  | 1 | 1 | 2.6 |
| <i>RBFOX1</i>  | 1 | 1 | 2.6 |
| <i>RBL1</i>    | 1 | 1 | 2.6 |
| <i>RBM10</i>   | 1 | 1 | 2.6 |
| <i>RBM3</i>    | 1 | 1 | 2.6 |
| <i>RBM39</i>   | 2 | 1 | 2.6 |
| <i>RBMXL3</i>  | 1 | 1 | 2.6 |
| <i>RC3H2</i>   | 2 | 1 | 2.6 |
| <i>RCVRN</i>   | 1 | 1 | 2.6 |
| <i>RECQL</i>   | 1 | 1 | 2.6 |
| <i>RELN</i>    | 1 | 1 | 2.6 |
| <i>RERG</i>    | 1 | 1 | 2.6 |
| <i>RFC1</i>    | 1 | 1 | 2.6 |
| <i>RFPL3</i>   | 1 | 1 | 2.6 |
| <i>RGCC</i>    | 1 | 1 | 2.6 |
| <i>RGS20</i>   | 1 | 1 | 2.6 |
| <i>RGS3</i>    | 1 | 1 | 2.6 |
| <i>RGS6</i>    | 1 | 1 | 2.6 |
| <i>RHO</i>     | 1 | 1 | 2.6 |
| <i>RIF1</i>    | 1 | 1 | 2.6 |
| <i>RMDN3</i>   | 1 | 1 | 2.6 |
| <i>RNASE7</i>  | 1 | 1 | 2.6 |
| <i>RNF111</i>  | 1 | 1 | 2.6 |
| <i>RNF168</i>  | 1 | 1 | 2.6 |
| <i>RNF17</i>   | 1 | 1 | 2.6 |
| <i>RNF220</i>  | 1 | 1 | 2.6 |



|                      |   |   |     |
|----------------------|---|---|-----|
| <i>RNF43</i>         | 1 | 1 | 2.6 |
| <i>ROR2</i>          | 1 | 1 | 2.6 |
| <i>RP1</i>           | 1 | 1 | 2.6 |
| <i>RP11-46C24.3</i>  | 1 | 1 | 2.6 |
| <i>RP11-863K10.7</i> | 1 | 1 | 2.6 |
| <i>RPGRIP1</i>       | 1 | 1 | 2.6 |
| <i>RPS6KA2</i>       | 1 | 1 | 2.6 |
| <i>RPTOR</i>         | 1 | 1 | 2.6 |
| <i>RRBP1</i>         | 1 | 1 | 2.6 |
| <i>RTL1</i>          | 1 | 1 | 2.6 |
| <i>RTN4IP1</i>       | 1 | 1 | 2.6 |
| <i>RTN4R</i>         | 1 | 1 | 2.6 |
| <i>RUNDC1</i>        | 1 | 1 | 2.6 |
| <i>RUNX1T1</i>       | 1 | 1 | 2.6 |
| <i>SI00A7L2</i>      | 1 | 1 | 2.6 |
| <i>SAFB2</i>         | 1 | 1 | 2.6 |
| <i>SALL3</i>         | 1 | 1 | 2.6 |
| <i>SAMD15</i>        | 1 | 1 | 2.6 |
| <i>SAP130</i>        | 1 | 1 | 2.6 |
| <i>SATB1</i>         | 1 | 1 | 2.6 |
| <i>SBF2</i>          | 1 | 1 | 2.6 |
| <i>SCAF4</i>         | 1 | 1 | 2.6 |
| <i>SCAMP1</i>        | 1 | 1 | 2.6 |
| <i>SCARA5</i>        | 1 | 1 | 2.6 |
| <i>SCFD1</i>         | 1 | 1 | 2.6 |
| <i>SCN11A</i>        | 1 | 1 | 2.6 |
| <i>SCN4A</i>         | 1 | 1 | 2.6 |
| <i>SCUBE3</i>        | 1 | 1 | 2.6 |
| <i>SCYL3</i>         | 1 | 1 | 2.6 |
| <i>SDF4</i>          | 1 | 1 | 2.6 |
| <i>SEC16A</i>        | 1 | 1 | 2.6 |
| <i>SEC24A</i>        | 1 | 1 | 2.6 |
| <i>SEC24D</i>        | 1 | 1 | 2.6 |
| <i>SECISBP2</i>      | 1 | 1 | 2.6 |
| <i>SEMA3A</i>        | 1 | 1 | 2.6 |
| <i>SEMA3D</i>        | 1 | 1 | 2.6 |
| <i>SEN3</i>          | 1 | 1 | 2.6 |
| <i>SERPINA7</i>      | 1 | 1 | 2.6 |
| <i>SETDB1</i>        | 1 | 1 | 2.6 |
| <i>SF3B1</i>         | 1 | 1 | 2.6 |
| <i>SGCD</i>          | 1 | 1 | 2.6 |
| <i>SH3TC2</i>        | 1 | 1 | 2.6 |
| <i>SHMT2</i>         | 1 | 1 | 2.6 |
| <i>SIAH3</i>         | 1 | 1 | 2.6 |
| <i>SIDT2</i>         | 1 | 1 | 2.6 |
| <i>SIGLEC5</i>       | 1 | 1 | 2.6 |
| <i>SIGLEC6</i>       | 1 | 1 | 2.6 |
| <i>SKA3</i>          | 1 | 1 | 2.6 |
| <i>SLC14A2</i>       | 1 | 1 | 2.6 |
| <i>SLC15A3</i>       | 1 | 1 | 2.6 |
| <i>SLC17A1</i>       | 1 | 1 | 2.6 |
| <i>SLC17A2</i>       | 1 | 1 | 2.6 |
| <i>SLC17A7</i>       | 1 | 1 | 2.6 |
| <i>SLC18A1</i>       | 1 | 1 | 2.6 |

|                 |   |   |     |
|-----------------|---|---|-----|
| <i>SLC1A6</i>   | 1 | 1 | 2.6 |
| <i>SLC22A1</i>  | 1 | 1 | 2.6 |
| <i>SLC22A9</i>  | 2 | 1 | 2.6 |
| <i>SLC23A3</i>  | 1 | 1 | 2.6 |
| <i>SLC25A36</i> | 2 | 1 | 2.6 |
| <i>SLC25A42</i> | 1 | 1 | 2.6 |
| <i>SLC27A3</i>  | 1 | 1 | 2.6 |
| <i>SLC27A6</i>  | 1 | 1 | 2.6 |
| <i>SLC2A12</i>  | 1 | 1 | 2.6 |
| <i>SLC30A10</i> | 1 | 1 | 2.6 |
| <i>SLC30A8</i>  | 1 | 1 | 2.6 |
| <i>SLC34A1</i>  | 1 | 1 | 2.6 |
| <i>SLC36A3</i>  | 1 | 1 | 2.6 |
| <i>SLC44A1</i>  | 1 | 1 | 2.6 |
| <i>SLC44A5</i>  | 1 | 1 | 2.6 |
| <i>SLC46A1</i>  | 1 | 1 | 2.6 |
| <i>SLC5A10</i>  | 1 | 1 | 2.6 |
| <i>SLC5A7</i>   | 1 | 1 | 2.6 |
| <i>SLC6A17</i>  | 1 | 1 | 2.6 |
| <i>SLC6A3</i>   | 1 | 1 | 2.6 |
| <i>SLC7A9</i>   | 1 | 1 | 2.6 |
| <i>SLC9A3</i>   | 1 | 1 | 2.6 |
| <i>SLC9A7</i>   | 1 | 1 | 2.6 |
| <i>SLCO1C1</i>  | 1 | 1 | 2.6 |
| <i>SLIT3</i>    | 1 | 1 | 2.6 |
| <i>SLITRK3</i>  | 1 | 1 | 2.6 |
| <i>SMAD5</i>    | 1 | 1 | 2.6 |
| <i>SMARCA1</i>  | 1 | 1 | 2.6 |
| <i>SMARCC1</i>  | 2 | 1 | 2.6 |
| <i>SMARCD3</i>  | 1 | 1 | 2.6 |
| <i>SMC3</i>     | 1 | 1 | 2.6 |
| <i>SMG6</i>     | 1 | 1 | 2.6 |
| <i>SMPD3</i>    | 1 | 1 | 2.6 |
| <i>SNAP91</i>   | 1 | 1 | 2.6 |
| <i>SNCAIP</i>   | 1 | 1 | 2.6 |
| <i>SNRPF</i>    | 1 | 1 | 2.6 |
| <i>SNRPG</i>    | 1 | 1 | 2.6 |
| <i>SNTA1</i>    | 1 | 1 | 2.6 |
| <i>SOGA3</i>    | 1 | 1 | 2.6 |
| <i>SORBS1</i>   | 1 | 1 | 2.6 |
| <i>SOWAHB</i>   | 1 | 1 | 2.6 |
| <i>SOX5</i>     | 1 | 1 | 2.6 |
| <i>SP9</i>      | 1 | 1 | 2.6 |
| <i>SPAG17</i>   | 1 | 1 | 2.6 |
| <i>SPATA18</i>  | 1 | 1 | 2.6 |
| <i>SPATC1</i>   | 1 | 1 | 2.6 |
| <i>SPDYE4</i>   | 1 | 1 | 2.6 |
| <i>SPEG</i>     | 1 | 1 | 2.6 |
| <i>SPG11</i>    | 1 | 1 | 2.6 |
| <i>SPHKAP</i>   | 1 | 1 | 2.6 |
| <i>SPII</i>     | 1 | 1 | 2.6 |
| <i>SPON1</i>    | 1 | 1 | 2.6 |
| <i>SPPL2C</i>   | 1 | 1 | 2.6 |
| <i>SPRED1</i>   | 1 | 1 | 2.6 |

|                |   |   |     |
|----------------|---|---|-----|
| <i>SPRY1</i>   | 1 | 1 | 2.6 |
| <i>SPTB</i>    | 1 | 1 | 2.6 |
| <i>SPTBN5</i>  | 1 | 1 | 2.6 |
| <i>SRFBP1</i>  | 1 | 1 | 2.6 |
| <i>SRRM2</i>   | 1 | 1 | 2.6 |
| <i>SRRM4</i>   | 1 | 1 | 2.6 |
| <i>SSH1</i>    | 1 | 1 | 2.6 |
| <i>SSPO</i>    | 1 | 1 | 2.6 |
| <i>ST14</i>    | 1 | 1 | 2.6 |
| <i>ST5</i>     | 1 | 1 | 2.6 |
| <i>STAB2</i>   | 1 | 1 | 2.6 |
| <i>STAM2</i>   | 1 | 1 | 2.6 |
| <i>STAT5B</i>  | 1 | 1 | 2.6 |
| <i>STBD1</i>   | 1 | 1 | 2.6 |
| <i>STC1</i>    | 1 | 1 | 2.6 |
| <i>STK24</i>   | 1 | 1 | 2.6 |
| <i>STK38L</i>  | 1 | 1 | 2.6 |
| <i>STXBP1</i>  | 1 | 1 | 2.6 |
| <i>SUDS3</i>   | 1 | 1 | 2.6 |
| <i>SVEP1</i>   | 2 | 1 | 2.6 |
| <i>SYCP2</i>   | 1 | 1 | 2.6 |
| <i>SYNDIG1</i> | 1 | 1 | 2.6 |
| <i>SYNJ1</i>   | 1 | 1 | 2.6 |
| <i>SYNM</i>    | 1 | 1 | 2.6 |
| <i>SYT1</i>    | 1 | 1 | 2.6 |
| <i>SYT10</i>   | 1 | 1 | 2.6 |
| <i>TANC2</i>   | 1 | 1 | 2.6 |
| <i>TANK</i>    | 1 | 1 | 2.6 |
| <i>TAOK2</i>   | 1 | 1 | 2.6 |
| <i>TAS1R1</i>  | 1 | 1 | 2.6 |
| <i>TAS2R7</i>  | 1 | 1 | 2.6 |
| <i>TBC1D14</i> | 1 | 1 | 2.6 |
| <i>TBC1D23</i> | 1 | 1 | 2.6 |
| <i>TBC1D5</i>  | 1 | 1 | 2.6 |
| <i>TBL1XR1</i> | 1 | 1 | 2.6 |
| <i>TCERG1L</i> | 1 | 1 | 2.6 |
| <i>TCF12</i>   | 1 | 1 | 2.6 |
| <i>TCF21</i>   | 1 | 1 | 2.6 |
| <i>TCF7</i>    | 1 | 1 | 2.6 |
| <i>TCOF1</i>   | 1 | 1 | 2.6 |
| <i>TCP10</i>   | 1 | 1 | 2.6 |
| <i>TDRD9</i>   | 1 | 1 | 2.6 |
| <i>TENM3</i>   | 1 | 1 | 2.6 |
| <i>TENM4</i>   | 1 | 1 | 2.6 |
| <i>TFIP11</i>  | 1 | 1 | 2.6 |
| <i>TGFBR2</i>  | 1 | 1 | 2.6 |
| <i>TH</i>      | 1 | 1 | 2.6 |
| <i>THAP2</i>   | 1 | 1 | 2.6 |
| <i>THEMIS2</i> | 1 | 1 | 2.6 |
| <i>THSD7B</i>  | 1 | 1 | 2.6 |
| <i>TIAM2</i>   | 1 | 1 | 2.6 |
| <i>TIMM23</i>  | 1 | 1 | 2.6 |
| <i>TJP3</i>    | 1 | 1 | 2.6 |
| <i>TLE3</i>    | 1 | 1 | 2.6 |

|                 |   |   |     |
|-----------------|---|---|-----|
| <i>TLX3</i>     | 1 | 1 | 2.6 |
| <i>TM2D3</i>    | 1 | 1 | 2.6 |
| <i>TMEM132B</i> | 1 | 1 | 2.6 |
| <i>TMEM132D</i> | 1 | 1 | 2.6 |
| <i>TMEM132E</i> | 1 | 1 | 2.6 |
| <i>TMEM173</i>  | 1 | 1 | 2.6 |
| <i>TMEM184C</i> | 1 | 1 | 2.6 |
| <i>TMEM2</i>    | 1 | 1 | 2.6 |
| <i>TMEM213</i>  | 1 | 1 | 2.6 |
| <i>TMEM237</i>  | 1 | 1 | 2.6 |
| <i>TMEM44</i>   | 1 | 1 | 2.6 |
| <i>TMEM45A</i>  | 1 | 1 | 2.6 |
| <i>TMEM5</i>    | 1 | 1 | 2.6 |
| <i>TMEM63C</i>  | 1 | 1 | 2.6 |
| <i>TMIGD2</i>   | 1 | 1 | 2.6 |
| <i>TMTC3</i>    | 1 | 1 | 2.6 |
| <i>TNC</i>      | 1 | 1 | 2.6 |
| <i>TNFAIP6</i>  | 1 | 1 | 2.6 |
| <i>TNFSF9</i>   | 1 | 1 | 2.6 |
| <i>TNNI3</i>    | 1 | 1 | 2.6 |
| <i>TNXB</i>     | 1 | 1 | 2.6 |
| <i>TOE1</i>     | 1 | 1 | 2.6 |
| <i>TPSAB1</i>   | 1 | 1 | 2.6 |
| <i>TRAF1</i>    | 1 | 1 | 2.6 |
| <i>TRAPPC12</i> | 1 | 1 | 2.6 |
| <i>TRGC1</i>    | 1 | 1 | 2.6 |
| <i>TRIM23</i>   | 1 | 1 | 2.6 |
| <i>TRIML1</i>   | 1 | 1 | 2.6 |
| <i>TRIO</i>     | 1 | 1 | 2.6 |
| <i>TRMT10C</i>  | 1 | 1 | 2.6 |
| <i>TRPC3</i>    | 1 | 1 | 2.6 |
| <i>TRPC4</i>    | 1 | 1 | 2.6 |
| <i>TRPM5</i>    | 1 | 1 | 2.6 |
| <i>TRPV4</i>    | 1 | 1 | 2.6 |
| <i>TSC2</i>     | 2 | 1 | 2.6 |
| <i>TSPAN10</i>  | 1 | 1 | 2.6 |
| <i>TSPAN19</i>  | 1 | 1 | 2.6 |
| <i>TSPEAR</i>   | 1 | 1 | 2.6 |
| <i>TST</i>      | 1 | 1 | 2.6 |
| <i>TTC1</i>     | 1 | 1 | 2.6 |
| <i>TTC14</i>    | 1 | 1 | 2.6 |
| <i>TUBB6</i>    | 1 | 1 | 2.6 |
| <i>TULP4</i>    | 1 | 1 | 2.6 |
| <i>TXNDC2</i>   | 1 | 1 | 2.6 |
| <i>TXNDC9</i>   | 1 | 1 | 2.6 |
| <i>TYRP1</i>    | 1 | 1 | 2.6 |
| <i>U2AF2</i>    | 1 | 1 | 2.6 |
| <i>UBE3B</i>    | 2 | 1 | 2.6 |
| <i>UBR3</i>     | 1 | 1 | 2.6 |
| <i>UCP1</i>     | 1 | 1 | 2.6 |
| <i>UGDH</i>     | 1 | 1 | 2.6 |
| <i>UGGT1</i>    | 1 | 1 | 2.6 |
| <i>UNC5A</i>    | 1 | 1 | 2.6 |
| <i>UPK3A</i>    | 1 | 1 | 2.6 |

|                |   |   |     |
|----------------|---|---|-----|
| <i>URGCP</i>   | 1 | 1 | 2.6 |
| <i>USF2</i>    | 1 | 1 | 2.6 |
| <i>USH2A</i>   | 1 | 1 | 2.6 |
| <i>USP35</i>   | 1 | 1 | 2.6 |
| <i>VASN</i>    | 1 | 1 | 2.6 |
| <i>VHLL</i>    | 1 | 1 | 2.6 |
| <i>VIPAS39</i> | 1 | 1 | 2.6 |
| <i>VPS13D</i>  | 1 | 1 | 2.6 |
| <i>VPS35</i>   | 1 | 1 | 2.6 |
| <i>VPS4B</i>   | 1 | 1 | 2.6 |
| <i>VPS52</i>   | 1 | 1 | 2.6 |
| <i>VPS8</i>    | 1 | 1 | 2.6 |
| <i>VRK2</i>    | 1 | 1 | 2.6 |
| <i>VRK3</i>    | 1 | 1 | 2.6 |
| <i>VRTN</i>    | 1 | 1 | 2.6 |
| <i>VWA3B</i>   | 1 | 1 | 2.6 |
| <i>VWCE</i>    | 1 | 1 | 2.6 |
| <i>VWF</i>     | 1 | 1 | 2.6 |
| <i>WAC</i>     | 1 | 1 | 2.6 |
| <i>WAS</i>     | 1 | 1 | 2.6 |
| <i>WASF2</i>   | 1 | 1 | 2.6 |
| <i>WDFY3</i>   | 1 | 1 | 2.6 |
| <i>WDFY4</i>   | 1 | 1 | 2.6 |
| <i>WDR1</i>    | 1 | 1 | 2.6 |
| <i>WDR17</i>   | 1 | 1 | 2.6 |
| <i>WDR3</i>    | 1 | 1 | 2.6 |
| <i>WDR66</i>   | 1 | 1 | 2.6 |
| <i>WDR78</i>   | 1 | 1 | 2.6 |
| <i>WDR81</i>   | 1 | 1 | 2.6 |
| <i>WFS1</i>    | 1 | 1 | 2.6 |
| <i>WNK4</i>    | 2 | 1 | 2.6 |
| <i>WWC1</i>    | 1 | 1 | 2.6 |
| <i>XIRP2</i>   | 1 | 1 | 2.6 |
| <i>XKR5</i>    | 1 | 1 | 2.6 |
| <i>XPNPEP2</i> | 1 | 1 | 2.6 |
| <i>XPO4</i>    | 1 | 1 | 2.6 |
| <i>YTHDC1</i>  | 1 | 1 | 2.6 |
| <i>ZBBX</i>    | 1 | 1 | 2.6 |
| <i>ZBTB10</i>  | 1 | 1 | 2.6 |
| <i>ZBTB17</i>  | 1 | 1 | 2.6 |
| <i>ZBTB21</i>  | 1 | 1 | 2.6 |
| <i>ZBTB46</i>  | 1 | 1 | 2.6 |
| <i>ZC3H12B</i> | 1 | 1 | 2.6 |
| <i>ZC3H18</i>  | 1 | 1 | 2.6 |
| <i>ZFP42</i>   | 1 | 1 | 2.6 |
| <i>ZIC1</i>    | 1 | 1 | 2.6 |
| <i>ZMAT1</i>   | 1 | 1 | 2.6 |
| <i>ZNF134</i>  | 1 | 1 | 2.6 |
| <i>ZNF148</i>  | 1 | 1 | 2.6 |
| <i>ZNF19</i>   | 1 | 1 | 2.6 |
| <i>ZNF234</i>  | 1 | 1 | 2.6 |
| <i>ZNF330</i>  | 1 | 1 | 2.6 |
| <i>ZNF337</i>  | 1 | 1 | 2.6 |
| <i>ZNF43</i>   | 1 | 1 | 2.6 |

|                |             |             |     |
|----------------|-------------|-------------|-----|
| <i>ZNF451</i>  | 1           | 1           | 2.6 |
| <i>ZNF462</i>  | 1           | 1           | 2.6 |
| <i>ZNF48</i>   | 1           | 1           | 2.6 |
| <i>ZNF556</i>  | 1           | 1           | 2.6 |
| <i>ZNF571</i>  | 1           | 1           | 2.6 |
| <i>ZNF592</i>  | 1           | 1           | 2.6 |
| <i>ZNF606</i>  | 1           | 1           | 2.6 |
| <i>ZNF623</i>  | 1           | 1           | 2.6 |
| <i>ZNF644</i>  | 1           | 1           | 2.6 |
| <i>ZNF652</i>  | 1           | 1           | 2.6 |
| <i>ZNF682</i>  | 1           | 1           | 2.6 |
| <i>ZNF714</i>  | 1           | 1           | 2.6 |
| <i>ZNF746</i>  | 1           | 1           | 2.6 |
| <i>ZNF785</i>  | 1           | 1           | 2.6 |
| <i>ZNF804B</i> | 1           | 1           | 2.6 |
| <i>ZNF841</i>  | 1           | 1           | 2.6 |
| <i>ZNFX1</i>   | 1           | 1           | 2.6 |
| <i>ZSCAN1</i>  | 1           | 1           | 2.6 |
| <i>ZZZ3</i>    | 1           | 1           | 2.6 |
| <b>Total</b>   | <b>1409</b> | <b>1373</b> |     |

FPC - familial pancreatic cancer.
